# Supplementary material for: The Effect of Cyanine Dye NK-4 on Photoreceptor Degeneration in a Rat Model of Early-Stage Retinitis Pigmentosa
Source: MDPI journal article supplement (doi:10.3390/ph14070694), 2021-07-19
Supplement: s1 [file s1]

Supplementary Table S2. Annotation of 5 up-regulated genes

| MyList         | Gene ID | Type   | Tax ID        | Homologene Gene ID | Homologene Gene Tax ID | Gene Symbol    | Description                       | Biological Process (GO)                                                                                                                                                              | GO:0042440 pigment metabolic process | GO:0055076 transition metal ion homeostas | GO:1901215 negative regulation of neuron |
|----------------|---------|--------|---------------|--------------------|------------------------|----------------|-----------------------------------|--------------------------------------------------------------------------------------------------------------------------------------------------------------------------------------|--------------------------------------|-------------------------------------------|------------------------------------------|
| <i>hmox1</i>   | 24451   | symbol | R. norvegicus | 24451              | R. norvegicus          | <i>Hmox1</i>   | heme oxygenase 1                  | GO:0006788 heme oxidation;GO:0032764 negative regulation of mast cell cytokine production;GO:0034395 regulation of transcription from RNA polymerase II promoter in response to iron | 1                                    | 1                                         | 1                                        |
| <i>mt1</i>     | 24567   | symbol | R. norvegicus | 24567              | R. norvegicus          | <i>Mt1</i>     | metallothionein 1                 | GO:0071247 cellular response to chromate;GO:0046687 response to chromate;GO:0010273 detoxification of copper ion                                                                     | 0                                    | 1                                         | 1                                        |
| <i>bdh2</i>    | 295458  | symbol | R. norvegicus | 295458             | R. norvegicus          | <i>Bdh2</i>    | 3-hydroxybutyrate dehydrogenase 2 | GO:0009237 siderophore metabolic process;GO:0019290 siderophore biosynthetic process;GO:0019184 nonribosomal peptide biosynthetic process                                            | 1                                    | 1                                         | 0                                        |
| <i>slc7a11</i> | 310392  | symbol | R. norvegicus | 310392             | R. norvegicus          | <i>Slc7a11</i> | solute carrier family 7 member 11 | GO:1901494 regulation of cysteine metabolic process;GO:0031335 regulation of sulfur amino acid metabolic process;GO:1903786 regulation of glutathione biosynthetic process           | 1                                    | 0                                         | 1                                        |
| <i>atf5</i>    | 282840  | symbol | R. norvegicus | 282840             | R. norvegicus          | <i>Atf5</i>    | activating transcription factor 5 | GO:0021891 olfactory bulb interneuron development;GO:0021924 cell proliferation in external granule layer;GO:0021930 cerebellar granule cell precursor proliferation                 | 0                                    | 0                                         | 0                                        |

Supplementary Table S3. Enrichment of 5 up-regulated genes

| Group ID  | Category                | Term       | Description                         | LogP         | Log(q-value) | InTerm_InList | Genes                 | Symbols                     |
|-----------|-------------------------|------------|-------------------------------------|--------------|--------------|---------------|-----------------------|-----------------------------|
| 1_Summary | GO Biological Processes | GO:0042440 | pigment metabolic process           | -6.302359406 | -2.034       | 3/67          | 24451, 295458, 310392 | <i>Hmox1, Bdh2, Slc7a11</i> |
| 1_Member  | GO Biological Processes | GO:0042440 | pigment metabolic process           | -6.302359406 | -2.034       | 3/67          | 24451, 295458, 310392 | <i>Hmox1, Bdh2, Slc7a11</i> |
| 2_Summary | GO Biological Processes | GO:0055076 | transition metal ion homeostasis    | -5.42142541  | -1.454       | 3/131         | 24451, 24567, 295458  | <i>Hmox1, Mt1, Bdh2</i>     |
| 2_Member  | GO Biological Processes | GO:0055076 | transition metal ion homeostasis    | -5.42142541  | -1.454       | 3/131         | 24451, 24567, 295458  | <i>Hmox1, Mt1, Bdh2</i>     |
| 2_Member  | GO Biological Processes | GO:0055065 | metal ion homeostasis               | -3.236322349 | 0.000        | 3/708         | 24451, 24567, 295458  | <i>Hmox1, Mt1, Bdh2</i>     |
| 2_Member  | GO Biological Processes | GO:0055080 | cation homeostasis                  | -3.11430281  | 0.000        | 3/779         | 24451, 24567, 295458  | <i>Hmox1, Mt1, Bdh2</i>     |
| 2_Member  | GO Biological Processes | GO:0098771 | inorganic ion homeostasis           | -3.093200204 | 0.000        | 3/792         | 24451, 24567, 295458  | <i>Hmox1, Mt1, Bdh2</i>     |
| 3_Summary | GO Biological Processes | GO:1901215 | negative regulation of neuron death | -4.5230839   | -0.732       | 3/261         | 24451, 24567, 310392  | <i>Hmox1, Mt1, Slc7a11</i>  |
| 3_Member  | GO Biological Processes | GO:1901215 | negative regulation of neuron death | -4.5230839   | -0.732       | 3/261         | 24451, 24567, 310392  | <i>Hmox1, Mt1, Slc7a11</i>  |
| 3_Member  | GO Biological Processes | GO:1901214 | regulation of neuron death          | -3.976679761 | -0.310       | 3/398         | 24451, 24567, 310392  | <i>Hmox1, Mt1, Slc7a11</i>  |
| 3_Member  | GO Biological Processes | GO:0070997 | neuron death                        | -3.832640965 | -0.263       | 3/445         | 24451, 24567, 310392  | <i>Hmox1, Mt1, Slc7a11</i>  |
