# Supplementary material for: The Effect of Cyanine Dye NK-4 on Photoreceptor Degeneration in a Rat Model of Early-Stage Retinitis Pigmentosa
Source: MDPI journal article supplement (doi:10.3390/ph14070694), 2021-07-19
Supplement: s1 [file s1]

TUNEL / DAPI ( at the site a )

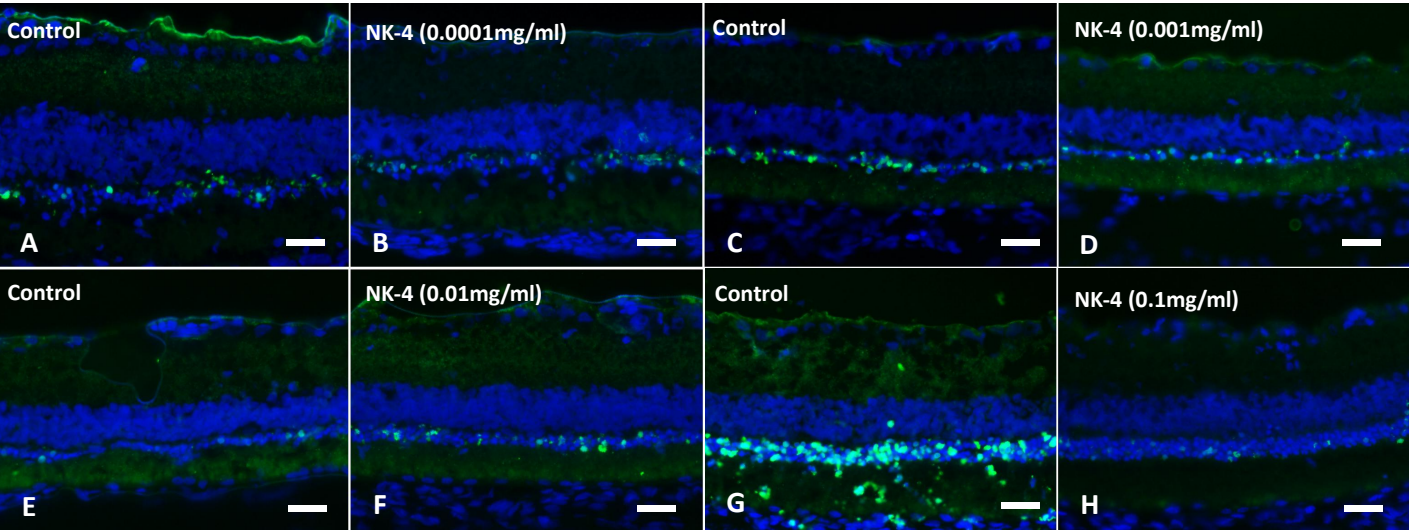

TUNEL / DAPI ( at the site b )

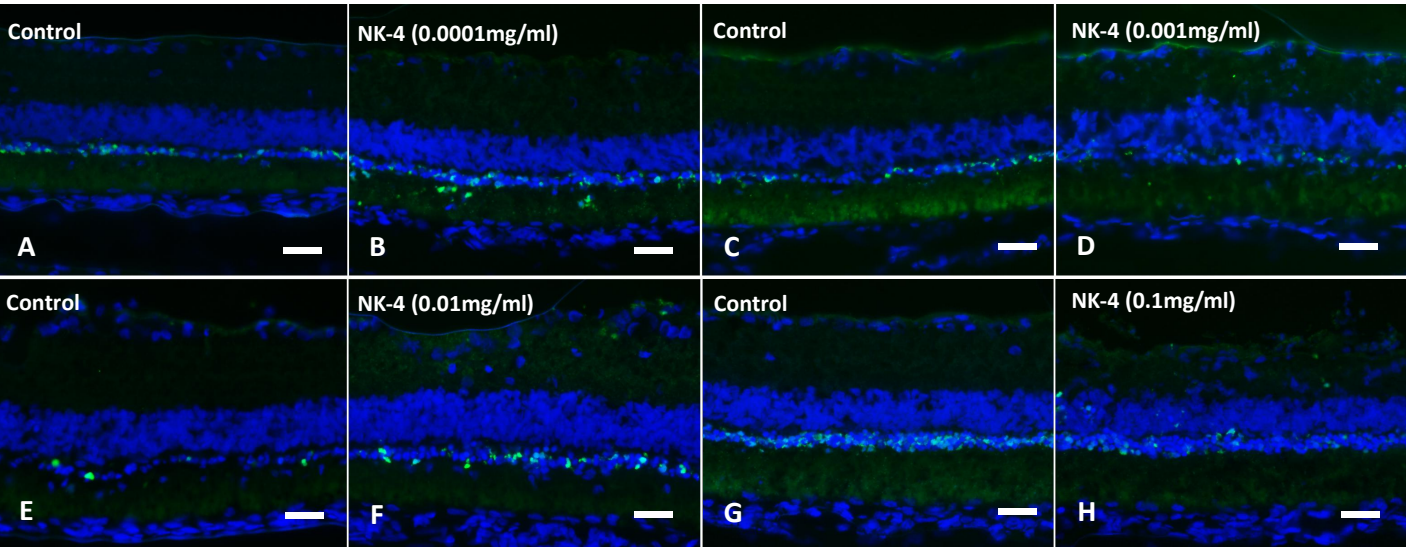

TUNEL / DAPI ( at the site c )

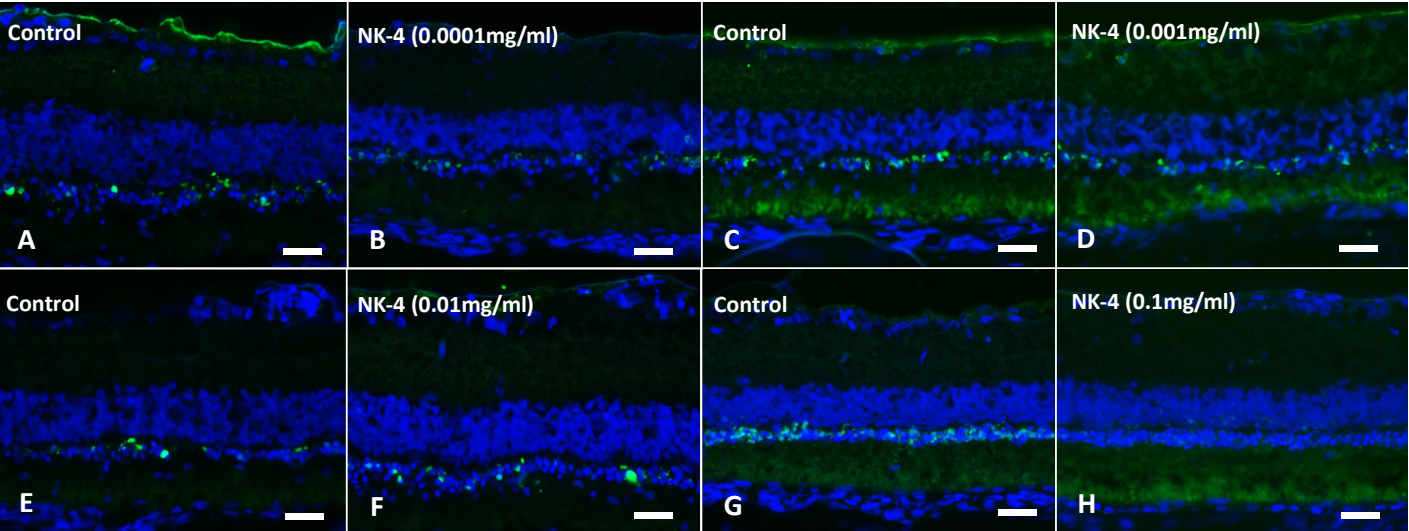

**Supplementary Figure S1.** TUNEL staining of retinal sections at the site of “a, b, c”. TUNEL assay indicated that TUNEL-positive signals (green) were mainly detected in the ONL and were likely to be fewer in retinas treated with NK-4 (0.0001 mg/ml, 0.001 mg/ml, 0.01 mg/ml, and 0.1 mg/ml) than in those with control vehicle. Cell nuclei were counterstained with DAPI (blue). Pair groups: A vs. B, C vs. D, E vs. F, G vs. H. ONL, outer nuclear layer; INL, inner nuclear layer; OPL, outer plexiform layer. Scale bar = 20  $\mu$ m.

TUNEL / DAPI ( at the site d )

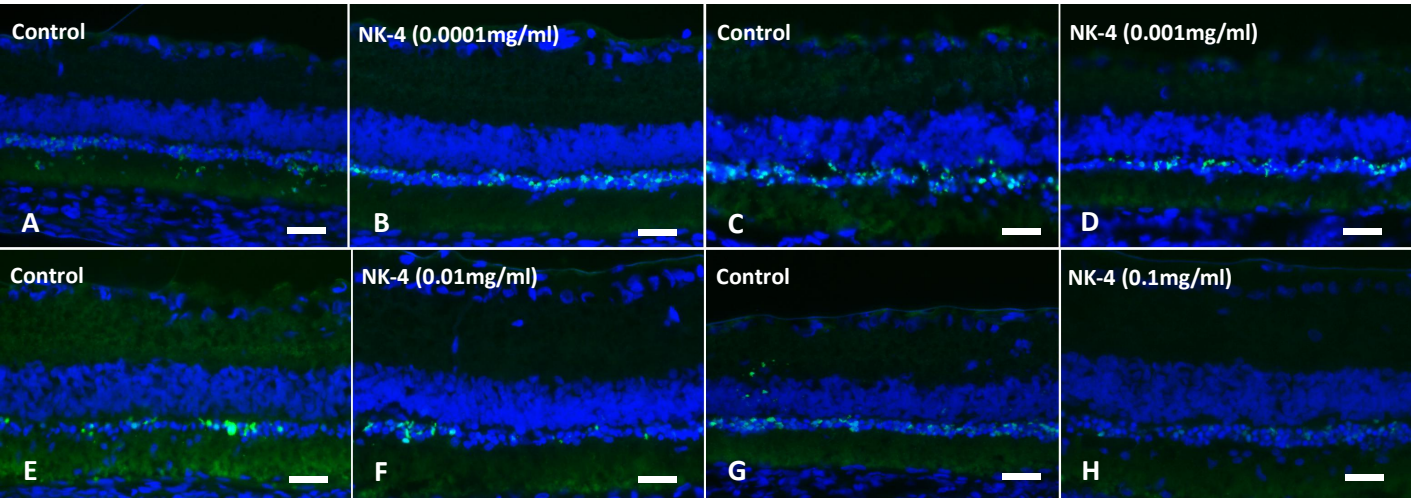

TUNEL / DAPI ( at the site e )

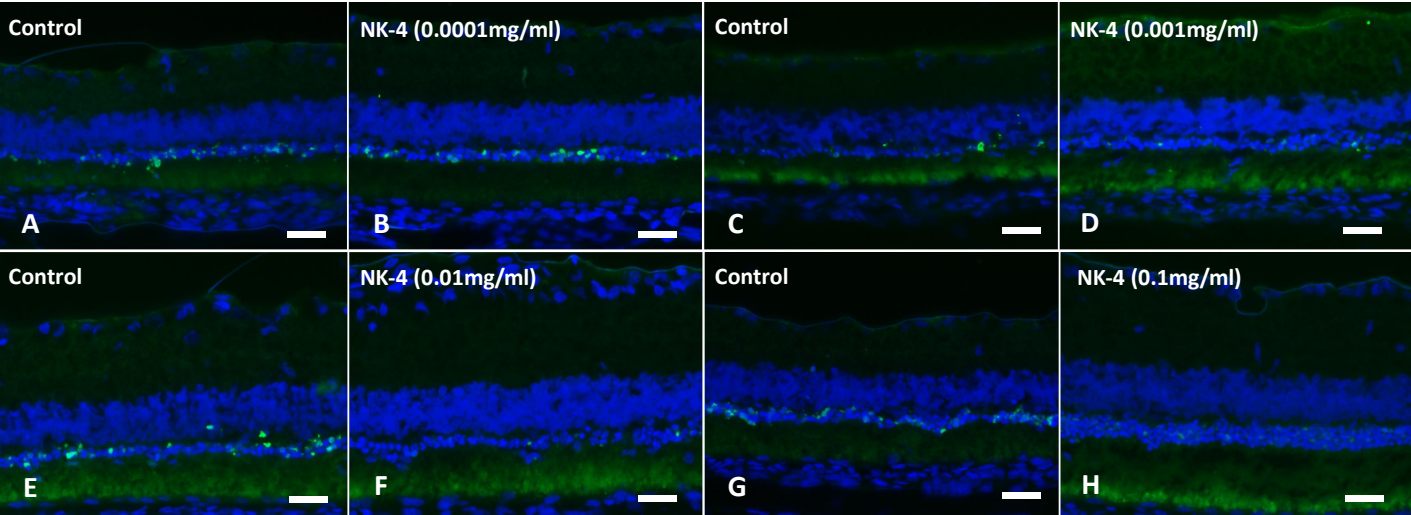

**Supplementary Figure S1 (continued).** TUNEL staining of retinal sections at the site of “d, e”. TUNEL assay indicated that TUNEL-positive signals (green) were mainly detected in the ONL and were likely to be fewer in retinas treated with NK-4 (0.0001 mg/ml, 0.001 mg/ml, 0.01 mg/ml, and 0.1 mg/ml) than in those with control vehicle. Cell nuclei were counterstained with DAPI (blue). Pair groups: A vs. B, C vs. D, E vs. F, G vs. H. ONL, outer nuclear layer; INL, inner nuclear layer; OPL, outer plexiform layer. Scale bar = 20 μm.
