# Supplementary material for: The Effect of Cyanine Dye NK-4 on Photoreceptor Degeneration in a Rat Model of Early-Stage Retinitis Pigmentosa
Source: Pharmaceuticals (Basel). 2021 Jul 19;14(7):694. doi: 10.3390/ph14070694 (PMC8308753; doi:10.3390/ph14070694)
Supplement: Supplementary file 1 [file pharmaceuticals-14-00694-s001.zip › Supplementary Table S1_RNA-seq raw data.xlsx]

## Sheet: RNA-seq
gene_name	locus on rn4	Experiment1			Experiment2			Experiment3			Experiment4			Assembled				All_increase
		value_control	value_NK4	log2(fold_change)	value_control	value_NK4	log2(fold_change)	value_control	value_NK4	log2(fold_change)	value_control	value_NK4	log2(fold_change)	value_control	value_NK4	log2(fold_change)	p_value
SLC22A8	chr1:211269365-211287596	0.608163	0.891634	0.551993	0.469638	0.963305	1.03644	2.92087	5.46634	0.904176	1.08278	12.9999	3.58568	1.22812	4.8197	1.97249	5e-05	1
GCG	chr3:44432001-44441017	0.417238	0.675919	0.695981	0.339018	0.603405	0.831762	0.702759	1.42439	1.01924	0.692203	3.14137	2.18213	0.530066	1.40884	1.41027	0.0208	1
CASP4	chr8:2038591-2075722	0.57887	2.81342	2.28101	0.940457	1.86037	0.984158	2.27186	6.48179	1.51252	1.26988	2.04346	0.686323	1.23695	3.23353	1.38633	0.0046	1
PPIC	chr18:48886547-48899154	0.301423	1.13952	1.91856	0.489344	0.799187	0.707682	1.44077	2.3191	0.686721	1.14414	4.55001	1.9916	0.819518	2.12352	1.37361	0.004	1
CDH3	chr19:36343822-36393819	0.198172	0.305855	0.626094	0.275317	0.409432	0.572533	0.869712	1.2485	0.521591	0.589288	2.63991	2.16345	0.469557	1.10056	1.22886	0.0057	1
BFSP2	chr8:108463716-108522500	1.79017	3.38402	0.91864	0.968369	2.71225	1.48586	1.40454	4.20468	1.5819	2.66027	5.21093	0.969968	1.69494	3.81995	1.17232	0.00415	1
TRIB3	chr3:142664049-142670170	1.77833	3.91322	1.13783	2.30674	4.59039	0.992759	1.947	5.14827	1.40284	2.28669	3.75509	0.715587	2.0825	4.3337	1.05728	0.0036	1
MT1	chr19:11261630-11262647	51.6515	99.295	0.942912	52.6982	141.185	1.42176	83.5437	128.113	0.616817	46.5435	90.5525	0.960174	58.3045	114.762	0.976961	0.0001	1
C1QTNF5	chr8:47089563-47091434	4.14516	5.96973	0.526238	3.32334	4.95862	0.577304	3.87628	7.37737	0.928435	3.62302	10.4942	1.53433	3.75095	7.08055	0.916607	0.00275	1
BDH2	chr2:232765048-232785694	0.645092	2.18973	1.76318	1.79636	3.19861	0.832372	2.99701	5.06341	0.756584	2.7713	4.74786	0.776716	2.00796	3.72225	0.890448	0.0246	1
ATF5	chr1:95284510-95286786	7.13786	14.2494	0.997337	8.08554	14.8063	0.872793	39.5674	76.3254	0.947852	33.299	49.5713	0.574024	21.2397	37.1711	0.807418	0.0006	1
HMOX1	chr19:13963122-13969964	2.75347	3.87498	0.492937	2.56526	6.42576	1.32476	7.82933	13.5342	0.789652	4.67903	7.29094	0.639896	4.35874	7.59759	0.80163	0.00575	1
SLC7A11	chr2:139241141-139317101	10.4841	16.0441	0.613836	9.59227	14.7766	0.623372	18.9022	33.18	0.811761	12.5741	23.9089	0.927091	12.7446	21.5264	0.756224	5e-05	1
SMAD6	chr8:68144336-68213725	2.525	3.75845	0.573856	2.16574	3.21321	0.569155	2.30225	3.23185	0.489315	1.93177	3.88643	1.00852	2.24267	3.51293	0.647456	0.0493	1
PPFIBP2	chr1:164979708-165125076	0.842434	1.39366	0.726244	0.824897	1.21836	0.562649	1.36147	2.2828	0.74564	1.71449	2.51946	0.555329	1.16932	1.81639	0.635403	0.04895	1
SOD3	chr14:63381446-63387180	0.392883	0.363774	-0.111055	0.48564	0.757591	0.641531	5.18218	7.54153	0.5413	1.00548	31.3304	4.96161	1.68644	9.41189	2.4805	5e-05	0
BMP4	chr15:22283040-22289984	0.129376	0.419257	1.69627	0.559892	0.436581	-0.3589	1.3697	3.26042	1.2512	0.219626	8.18329	5.21956	0.555249	2.90924	2.38944	0.00045	0
PMAIP1	chr18:62914708-62921090	0.643851	9.72827	3.91738	0.348288	2.95146	3.08308	0.727695	1.56804	1.10756	1.58337	1.47831	-0.0990512	0.81112	4.0784	2.33002	0.0376	0
OPTC	chr13:46846755-46858100	2.74306	2.51386	-0.12588	2.78962	2.56453	-0.121372	14.0255	26.249	0.904208	1.74498	76.1189	5.44698	5.16739	25.345	2.29419	5e-05	0
NPVF	chr4:78886520-78890237	1.17979	1.2734	0.110147	1.02717	0.909932	-0.174845	14.2368	18.3452	0.365778	3.45768	78.3504	4.50206	4.74471	23.2546	2.29312	5e-05	0
MFRP	chr8:47084055-47089218	0.364226	0.612073	0.74887	0.437477	0.507243	0.213471	3.09017	4.84664	0.649297	0.801445	16.478	4.36179	1.12732	5.29658	2.23216	5e-05	0
LTBP2	chr6:108826438-108924895	0.570988	0.402112	-0.505865	0.54506	0.563884	0.0489817	5.68141	8.87744	0.643895	0.453684	24.6669	5.76474	1.73492	8.12005	2.22662	5e-05	0
FBLN2	chr4:125380499-125441075	1.67803	1.24787	-0.427303	1.62445	1.61788	-0.00584498	2.71683	6.55158	1.26992	1.42365	26.7769	4.23332	1.85064	8.57329	2.21182	5e-05	0
NOTUM	chr10:110047039-110054106	0.27765	0.249949	-0.151632	0.250167	0.312311	0.320096	0.512544	1.51692	1.5654	0.516189	5.17178	3.32469	0.382971	1.71704	2.16462	0.00045	0
FBLN1	chr7:123208153-123287289	0.814892	1.13123	0.473211	1.20009	1.47708	0.2996	29.9611	35.2684	0.235289	2.46507	110.375	5.48465	8.1408	34.8393	2.09747	5e-05	0
GJA1	chr20:35409814-35422259	3.15552	4.17989	0.405586	3.22698	4.42971	0.457028	15.2824	23.1878	0.601489	4.19787	81.0041	4.27027	6.27207	26.7093	2.09033	5e-05	0
SLC26A4	chr6:49389211-49427000	1.46119	1.78449	0.288376	1.78504	1.80695	0.0175984	9.34376	15.5826	0.737857	3.21667	44.5225	3.79089	3.81541	15.0424	1.97913	5e-05	0
STEAP1	chr4:24962597-24973106	0.175653	0.189718	0.111128	0.285286	0.592735	1.05498	0.238497	1.0746	2.17176	0.294192	2.20081	2.90321	0.247945	0.974133	1.9741	0.01805	0
CRYBA2	chr9:74222838-74226049	0.195109	0.631886	1.69538	2.96853	1.12862	-1.39519	10.9764	0.850823	-3.68941	7.38404	76.0567	3.36459	5.16637	18.5108	1.84115	5e-05	0
RGD1305645	chr9:42930953-42950605	1.02407	0.276467	-1.88914	0.693972	0.370246	-0.906392	3.75365	5.18476	0.465982	0.838083	17.5193	4.38571	1.53472	5.49471	1.84007	0.001	0
OTX1	chr14:102720080-102726929	0.318426	0.564371	0.825685	0.339883	0.30589	-0.152028	1.26684	2.04712	0.692356	0.700997	6.58315	3.2313	0.638229	2.2542	1.82047	0.0069	0
OGN	chr17:20969065-21145330	2.03269	1.93545	-0.0707233	1.56389	1.76052	0.170864	8.39444	13.7947	0.716608	3.84047	38.5328	3.32673	3.83552	13.2466	1.78813	5e-05	0
ENPP2	chr7:91295814-91377947	2.75446	2.67676	-0.0412784	2.35506	2.65219	0.171421	5.93346	10.501	0.823581	3.12235	34.047	3.44682	3.48829	11.8553	1.76493	5e-05	0
WFDC1	chr19:49924309-49943113	3.67882	3.68447	0.00221202	5.88016	3.87726	-0.600819	14.5974	24.0654	0.721246	4.62406	60.1241	3.70071	7.05123	21.7376	1.62425	5e-05	0
SLC13A3	chr3:156447899-156510620	2.45455	3.29191	0.423465	2.134	3.15542	0.564271	4.17625	8.22115	0.977132	2.00661	18.616	3.21371	2.67251	7.99704	1.58127	5e-05	0
MFAP4	chr10:47646156-47649095	4.78482	3.71254	-0.366059	5.46885	5.06806	-0.109804	19.1227	27.8483	0.542309	6.7391	73.4477	3.44609	8.80171	26.0695	1.56651	5e-05	0
TYRP1	chr5:99518305-99537289	0.645404	1.68809	1.38712	1.02794	0.786022	-0.387108	4.30482	3.81454	-0.174442	1.35063	15.3386	3.50547	1.77327	5.14743	1.53744	5e-05	0
OLFML1	chr1:164953063-164977360	0.586986	0.5674	-0.0489612	0.567554	0.982957	0.79237	1.59422	2.72137	0.771484	0.909606	6.57567	2.85382	0.896168	2.58903	1.53057	5e-05	0
ENPP6	chr16:48396462-48516698	0.336757	0.485032	0.526374	0.303525	0.432909	0.512248	0.65744	0.610298	-0.107347	0.2394	3.03337	3.66343	0.380725	1.09744	1.52733	0.0102	0
STAC	chr8:115960736-116076188	0.312759	0.422497	0.43389	0.670782	0.525136	-0.353153	0.800606	1.67996	1.06926	0.260734	3.51475	3.75277	0.509755	1.46816	1.52613	0.01345	0
GZMM	chr7:11526383-11533590	0.489925	1.05814	1.1109	0.398328	0.708519	0.830851	3.02782	3.03966	0.00563339	1.20661	9.13596	2.92059	1.23244	3.32269	1.43083	0.00805	0
CLDN19	chr5:139838013-139842711	0.803667	1.13524	0.498322	1.20379	0.596038	-1.01411	2.33654	3.16013	0.435613	0.262806	7.94705	4.91835	1.14122	3.06283	1.42428	0.00105	0
VCAN	chr2:19712628-19812592	0.958051	0.737123	-0.378196	0.597903	0.746174	0.319602	2.40776	4.05169	0.750832	1.5803	8.97575	2.50584	1.35348	3.44629	1.34837	5e-05	0
CLIC6	chr11:32516491-32559195	0.41849	1.26586	1.59686	0.226205	0.645579	1.51296	0.987054	1.01477	0.0399568	0.288029	1.82317	2.66216	0.470925	1.17178	1.31513	0.01505	0
FBN1	chr3:112607811-112804951	2.40452	2.41042	0.00353547	2.04173	2.1517	0.07568	9.68461	12.9712	0.421544	4.70293	28.5859	2.60367	4.56832	10.9492	1.26109	5e-05	0
CRYAB	chr8:54107289-54111502	39.8479	45.6605	0.196445	46.8403	46.3331	-0.0157055	115.223	107.407	-0.101344	81.9483	478.008	2.54425	69.4824	161.623	1.21792	5e-05	0
BMP2	chr3:121371551-121382429	0.652574	0.804921	0.302706	0.451702	0.881163	0.964039	1.90827	2.44081	0.355092	0.694596	4.62879	2.73639	0.905365	2.10308	1.21593	0.00715	0
NID2	chr15:4801182-4856895	1.52039	1.86035	0.291136	1.70165	2.08404	0.292446	3.16132	4.97286	0.65355	2.2536	11.4586	2.34612	2.13103	4.89505	1.19977	5e-05	0
FMOD	chr13:46987713-46998331	3.80513	3.64676	-0.0613317	4.31095	4.91137	0.188121	15.3231	15.6651	0.0318483	5.18247	42.5556	3.03764	6.97449	15.912	1.18995	5e-05	0
NPY	chr4:78037985-78045189	11.1813	10.8891	-0.038203	8.32073	11.8312	0.507812	10.5679	21.4255	1.01965	9.07555	47.9751	2.40223	9.80826	22.2778	1.18354	0.00085	0
HSPG2	chr5:156226988-156328912	0.845946	1.11649	0.400338	0.876025	1.25702	0.520959	1.67999	3.20857	0.933478	1.70587	5.99292	1.81275	1.25631	2.78442	1.14819	5e-05	0
GSTM2	chr2:203549021-203553380	2.08987	3.38394	0.695289	1.36337	2.21631	0.700977	9.67057	8.7534	-0.143759	6.54153	27.0207	2.04636	4.74084	9.8713	1.0581	0.01165	0
COL4A1	chr16:83045182-83157835	6.64257	7.78202	0.228404	6.49869	7.69795	0.244326	14.2632	16.5689	0.216182	12.5295	51.8442	2.04885	9.8094	20.1361	1.03754	5e-05	0
GPRC5C	chr10:104732181-104754454	0.585469	0.704739	0.267495	0.358176	0.472915	0.400913	0.998629	0.866015	-0.205556	0.656552	3.33941	2.34661	0.640696	1.29807	1.01866	0.0357	0
COL9A1	chr9:22907067-22990836	11.5447	10.8503	-0.089495	12.8275	12.149	-0.0784052	37.4894	47.9026	0.35362	24.8804	104.196	2.06621	21.1683	41.7369	0.979419	5e-05	0
COLEC12	chr18:996296-1188288	0.720576	0.406161	-0.827099	0.812556	0.362476	-1.16458	1.70372	2.3896	0.488079	0.922183	5.2942	2.52129	1.02494	2.00467	0.967823	0.00845	0
ZIC1	chr8:96313493-96318868	4.87246	4.12493	-0.240279	2.39079	5.14765	1.10643	6.65801	8.27586	0.313819	3.96017	18.0509	2.18844	4.4309	8.62288	0.960568	0.00135	0
FGFR2	chr1:189482974-189589279	1.41177	1.2479	-0.178005	1.64078	1.47737	-0.151352	2.19414	2.74864	0.325057	0.92371	6.94182	2.9098	1.54243	2.9924	0.956104	0.0007	0
CLDN2	chrX:127538684-127549019	1.39491	1.41082	0.0163543	1.57149	0.9443	-0.734816	2.96128	3.5502	0.261679	1.36314	8.55218	2.64936	1.80418	3.46097	0.939831	0.002	0
SNED1	chr9:92509498-92568597	5.39693	5.09796	-0.0822176	5.26283	4.92102	-0.096881	7.17131	10.8533	0.597825	3.93553	21.8767	2.47476	5.44173	10.3227	0.923686	5e-05	0
MGMT	chr1:196629365-196866937	2.44362	8.08042	1.72541	5.1378	4.41734	-0.217973	4.52917	9.28394	1.03549	4.06775	8.30177	1.02919	4.03523	7.43141	0.880985	0.01525	0
DIO3	chr6_random:1588183-1590044	0.617865	0.444966	-0.473595	0.501124	0.446784	-0.165592	3.66221	2.44504	-0.582853	0.484488	6.33634	3.70912	1.27006	2.29467	0.853386	0.04005	0
PRKCDBP	chr1:163212921-163214511	7.4614	9.29522	0.317043	7.15516	9.39562	0.393003	8.1111	12.2306	0.59253	5.21016	18.8375	1.85421	7.01373	12.2254	0.801624	0.01	0
COL18A1	chr20:11872458-11982466	12.3319	12.5645	0.0269517	12.9409	13.9901	0.112475	28.5773	34.9253	0.289406	17.2821	64.0069	1.88895	17.5081	30.2111	0.787058	5e-05	0
FAM129A	chr13:66467072-66620136	1.53795	1.7407	0.178661	1.47699	1.31807	-0.164237	2.20282	3.46721	0.654423	2.37689	6.86267	1.5297	1.88132	3.23117	0.78031	0.00455	0
LAMA5	chr3:169233896-169282410	1.02789	1.13475	0.142685	0.981216	1.53686	0.64734	2.00136	2.92237	0.546161	1.37381	3.68925	1.42514	1.32858	2.25535	0.763462	0.00025	0
MEGF6	chr5:170848978-171078739	0.958367	0.800096	-0.260405	0.541197	0.525009	-0.0438114	1.52551	1.10139	-0.469972	0.417232	3.52833	3.08006	0.854582	1.43652	0.749286	0.03225	0
CHSY3	chr18:54963185-55274116	1.47119	1.56382	0.0880918	0.845995	1.8989	1.16644	1.19547	1.72314	0.527457	1.05248	2.46047	1.22514	1.1455	1.89585	0.726862	0.0222	0
NBL1	chr5_random:1704945-1716142	14.5744	13.629	-0.0967597	14.4097	14.2616	-0.0149116	27.3016	34.2001	0.325018	19.9227	66.9897	1.74952	18.8226	31.096	0.72426	5e-05	0
CPXM1	chr3:118000979-118007777	2.81546	2.40792	-0.225586	2.07119	2.75223	0.410143	4.72618	5.11505	0.114074	2.59465	10.2973	1.98866	3.02105	4.97721	0.720288	0.0082	0
DAPL1	chr3:41187966-41207910	21.5709	27.8119	0.36662	31.45	35.3798	0.169864	39.0941	71.6811	0.874642	73.8681	143.258	0.955596	40.7989	67.0871	0.717504	0.002	0
SEMA3B	chr8:112845708-112852565	1.20667	2.40968	0.997809	1.9366	2.1153	0.127336	1.78009	2.72436	0.613969	1.19919	2.85268	1.25026	1.53445	2.50407	0.706554	0.0287	0
COL9A2	chr5:141623364-141640224	5.71706	5.11952	-0.159264	8.29247	5.74794	-0.528759	17.8683	19.9607	0.159754	12.7368	43.1179	1.75929	10.9299	17.6606	0.692257	0.00025	0
ABI3BP	chr11:44853363-45072422	1.57404	1.03628	-0.603053	0.770592	1.23307	0.678212	1.5138	1.727	0.190093	1.34684	4.65392	1.78886	1.29777	2.09601	0.691607	0.0288	0
PODN	chr5:129120260-129142307	0.801128	0.413928	-0.952653	0.941145	0.638077	-0.560687	1.89102	2.67942	0.502761	1.65506	5.05904	1.61198	1.29887	2.09181	0.687499	0.048	0
OLFML2A	chr3:18731164-18751940	4.05684	4.11236	0.0196083	4.3479	4.3192	-0.00955307	7.93296	10.3035	0.377201	5.33865	16.8809	1.66085	5.35693	8.60132	0.683152	0.0004	0
LRP2	chr3:51563763-51724478	0.780646	0.673606	-0.212763	0.61459	0.51746	-0.248177	1.2093	1.61521	0.417547	0.781824	2.76117	1.82036	0.839454	1.34105	0.675844	0.0041	0
DDR2	chr13:85796682-85900990	0.934703	1.24929	0.418524	1.14514	0.988164	-0.212707	1.52358	2.56235	0.750001	1.92552	4.18605	1.12034	1.36656	2.17391	0.669741	0.0314	0
DLL1	chr1:54240069-54248488	2.34109	2.67731	0.193601	2.02074	2.1844	0.112351	2.37235	3.23139	0.445841	2.15506	6.17306	1.51826	2.22519	3.4912	0.649792	0.0189	0
NID1	chr17:66855842-66930373	7.20432	8.71151	0.274059	7.6859	8.84638	0.202873	6.33835	8.64228	0.447305	7.43558	19.0314	1.35586	7.20051	11.1315	0.62848	0.00055	0
MMP11	chr20:13129666-13138450	2.08503	3.69402	0.825128	2.25401	4.70404	1.06141	5.40992	5.44769	0.0100381	2.76268	5.19098	0.909937	3.07509	4.71224	0.615787	0.02855	0
MRC2	chr10:94689060-94753073	1.80959	2.0319	0.167162	1.90713	2.07186	0.119525	3.92041	4.10696	0.0670641	1.91577	6.68849	1.80375	2.35948	3.6156	0.615767	0.01185	0
ANTXR1	chr4:121296007-121483876	1.3893	1.36035	-0.0303782	1.15709	1.53878	0.411284	2.92938	3.12367	0.0926449	2.37535	6.11296	1.36373	1.92734	2.93171	0.605132	0.0321	0
PEAR1	chr2:179809432-179829207	2.71874	2.87395	0.0801001	2.51429	2.65901	0.080739	3.16784	3.9451	0.316563	2.26809	7.06818	1.63986	2.6691	4.04531	0.599899	0.0088	0
MT2A	chr19:11267810-11268585	56.2914	104.238	0.888896	58.4292	125.076	1.09804	174.808	161.46	-0.114589	55.2882	123.863	1.1637	84.5177	127.458	0.592701	0.0119	0
MLF1	chr2:157230782-157263847	2.22949	4.18767	0.909434	4.51455	5.2336	0.213222	10.6814	15.2029	0.509246	11.2241	18.6813	0.734993	6.96158	10.4303	0.583301	0.046	0
PHGDH	chr2:193147942-193177137	10.3319	12.518	0.276904	10.3575	14.8858	0.523256	18.7564	32.2632	0.78251	16.4778	24.8717	0.593982	13.8022	20.6283	0.579726	0.00345	0
LOXL1	chr8:62083050-62106827	14.4326	12.3436	-0.225576	13.6501	14.8936	0.125781	18.8106	24.3649	0.373253	14.2312	41.1455	1.53168	15.2384	22.5551	0.565738	0.0016	0
COL4A2	chr16:82899293-83045155	6.80086	6.78266	-0.00386568	6.54477	6.87936	0.0719324	10.3563	11.6617	0.171278	9.44238	24.378	1.36836	8.21229	12.062	0.554611	0.0013	0
WLS	chr2:258014377-258128180	5.16843	5.18418	0.00439147	4.16218	4.32219	0.0544253	4.23743	4.89499	0.208117	3.87967	11.7714	1.60128	4.39017	6.42331	0.549041	0.04325	0
POSTN	chr2:143537080-143568342	27.2803	36.8858	0.435207	29.5413	43.598	0.561528	38.8291	56.1185	0.531338	35.7023	56.7906	0.669636	32.6546	47.7321	0.547676	0.00015	0
COL4A5	chrX:36918650-37130562	6.22663	6.50734	0.0636175	5.81106	6.18082	0.0889985	8.13574	9.59724	0.238346	4.85225	14.9006	1.61865	6.25154	9.09822	0.541373	0.0016	0
LTBP1	chr6:19942625-20355085	4.11104	3.8474	-0.0956207	3.73655	4.34053	0.216163	7.76278	7.93211	0.0311309	4.45621	13.5078	1.59991	4.96	7.19021	0.535693	0.00485	0
COL6A2	chr20:12436782-12464512	1.62663	1.41124	-0.204929	1.94384	1.3307	-0.546719	5.48167	5.32785	-0.0410617	4.99148	12.5393	1.32892	3.41951	4.91411	0.52314	0.03405	0
SERPINH1	chr1:156666873-156674336	17.8836	19.0258	0.089317	19.3753	22.3388	0.205329	35.2224	43.5332	0.305623	28.0212	61.6582	1.13778	24.7985	35.588	0.52114	0.00225	0
FAM107A	chr15:18598081-18613890	2.9277	3.0563	0.0620216	3.30623	3.55222	0.103535	6.05017	6.04802	-0.000512713	3.07284	9.74554	1.66517	3.80059	5.44886	0.519731	0.03835	0
TIMP3	chr7:19510486-19947062	34.0809	45.62	0.420706	32.4879	39.8287	0.293907	38.3327	52.4857	0.453349	37.0872	67.3075	0.859844	35.4549	50.6832	0.515525	0.00785	0
IRF7	chr1:201456688-201459756	6.59775	9.17119	0.475135	3.46216	7.67086	1.14772	7.8166	7.41307	-0.0764696	7.98181	12.1471	0.605829	6.40265	9.04181	0.497942	0.03255	0
MX1	chr11:37438472-37464077	3.78556	6.02158	0.669637	2.53984	5.68969	1.16361	8.15198	4.86593	-0.744434	3.44564	8.08715	1.23086	4.40827	6.13422	0.476665	0.03865	0
INHBB	chr13:32170986-32178000	4.6714	6.26998	0.424606	5.41571	6.53367	0.270744	6.02488	6.14721	0.0289987	4.6416	10.1759	1.13246	5.18866	7.21213	0.475063	0.0258	0
SYT15	chr16:9852030-9862842	14.6634	17.1097	0.222595	16.3103	16.6721	0.0316526	24.0096	24.0985	0.00533202	14.2435	39.8378	1.48384	17.2219	23.9218	0.47408	0.00245	0
F5	chr13:79934955-79997282	2.08074	1.83669	-0.179986	1.58627	1.92749	0.281088	6.21558	5.51335	-0.172959	2.98689	8.84028	1.56545	3.1402	4.35964	0.473353	0.0234	0
IGFBP2	chr9:71966847-71994208	9.83732	9.80457	-0.0048107	8.21552	11.0334	0.425456	23.7198	18.6286	-0.348574	13.186	37.4077	1.50433	13.4843	18.6455	0.467549	0.0395	0
VCAM1	chr2:212277653-212297376	8.88112	9.62721	0.116375	7.68414	10.0381	0.385532	18.0431	17.8007	-0.0195114	11.9582	25.51	1.09306	11.467	15.3511	0.420855	0.0206	0
ID3	chr5:154934137-154935712	51.5176	57.9905	0.170751	47.9612	68.7187	0.518834	58.8318	82.368	0.485487	68.5147	97.0803	0.502764	56.4685	75.5475	0.419938	0.012	0
KCNG4	chr19:49880613-49892567	5.16861	6.56139	0.344226	6.70038	8.55475	0.352482	7.7085	9.20647	0.256198	6.17018	10.3825	0.750773	6.4184	8.5852	0.419638	0.02385	0
NT5DC2	chr16:6559618-6598118	23.91	29.8469	0.319965	29.486	33.4576	0.182305	31.8344	36.5785	0.200407	25.8706	48.1388	0.895889	27.7599	36.5912	0.398496	0.0248	0
FAT1	chr16:50472073-50591399	5.60675	5.85542	0.0626092	4.35473	5.76182	0.403943	8.20753	10.5066	0.356281	6.67276	10.6794	0.678478	6.15362	8.03679	0.385184	0.01045	0
RSAD2	chr6:44100774-44113910	6.69511	8.22086	0.296182	3.81695	8.38452	1.13531	8.88134	7.19212	-0.30436	6.35612	9.50438	0.580447	6.38396	8.30476	0.379487	0.0484	0
AGT	chr19:54738511-54750349	14.8396	15.8528	0.0952887	17.7031	21.5148	0.281323	15.9869	22.5603	0.496889	16.9599	26.0576	0.619579	16.4037	21.2673	0.374615	0.04525	0
COL9A3	chr3:169688967-169731866	8.29817	7.36029	-0.173031	10.5032	8.46767	-0.310788	26.8414	25.6305	-0.0665982	19.4952	43.9035	1.17122	15.913	20.4826	0.364194	0.0476	0
ATP1B3	chr8:101405876-101437757	71.7499	78.0791	0.121958	72.3876	81.217	0.16604	123.418	143.904	0.221546	103.157	175.189	0.764072	91.6817	116.902	0.350599	0.0165	0
EFEMP1	chr14:109733624-109828628	45.1076	44.075	-0.0334094	45.4777	48.67	0.097874	59.9791	74.5264	0.313292	62.4227	104.609	0.744859	52.9245	66.5054	0.329536	0.03335	0
GPR56	chr19:10438316-10475607	17.1246	19.3271	0.174554	17.7842	21.109	0.247257	26.5427	29.318	0.143473	19.9151	33.1596	0.735563	20.211	25.3323	0.325839	0.0353	0
FSTL1	chr11:64680819-64735683	28.6157	28.7016	0.00432051	29.7794	28.1201	-0.0827098	32.0287	33.5455	0.0667539	26.3602	58.2781	1.1446	29.2522	36.5534	0.32146	0.0468	0
RAB3B	chr5:130185154-130284038	55.0512	59.9633	0.123305	50.8993	68.9633	0.438183	86.7802	100.881	0.217215	77.5939	108.588	0.484853	66.8961	83.1678	0.314103	0.04895	0
HADHB	chr6:26139396-26166945	32.8315	39.1857	0.255246	33.7759	42.9595	0.346986	46.8948	64.9574	0.470067	46.7807	53.0292	0.180874	39.7788	49.3612	0.311378	0.04725	0
ATP1A2	chr13:88258984-88283933	39.9115	36.3031	-0.136712	42.0041	45.3455	0.110429	76.3471	67.044	-0.187467	46.7974	108.335	1.211	50.7358	62.6868	0.305156	0.04875	0
SAT1	chrX:61634963-61638251	76.5928	102.892	0.425853	79.3786	101.927	0.360712	127.449	137.835	0.113026	95.1173	125.217	0.396645	93.8406	115.805	0.303411	0.04465	0
SLC3A2	chr1:211375883-211390347	102.862	107.597	0.0649187	95.9498	118.199	0.30086	125.524	161.58	0.364283	110.773	152.201	0.458366	108.48	133.221	0.29639	0.0388	0
LENG8	chr1:69451366-69464241	56.6674	47.2671	-0.261682	82.3514	54.3624	-0.599185	121.391	111.036	-0.128634	132.744	109.506	-0.277641	96.8719	78.5411	-0.30263	0.0494	0
COL27A1	chr5:80197867-80318027	8.92642	7.75143	-0.203619	14.321	8.66988	-0.724047	15.9771	14.5944	-0.130587	16.4793	13.9069	-0.24486	13.8217	11.0195	-0.326879	0.04025	0
COL11A2	chr20:4924451-4953310	11.1797	9.73504	-0.199624	16.1202	10.0679	-0.679112	23.3595	24.0967	0.044826	33.3418	23.464	-0.506888	20.6454	16.3803	-0.333858	0.03155	0
CP	chr2:105086259-105177925	73.3957	60.5502	-0.277563	60.6075	82.2856	0.441145	292.921	121.674	-1.26749	69.6912	113.663	0.705718	120.752	92.8818	-0.378578	0.0338	0
COL16A1	chr5:149072831-149126351	2.93805	2.45968	-0.256385	4.58596	2.95588	-0.633637	16.2148	10.9749	-0.563109	10.8146	10.3556	-0.0625652	8.36783	6.42896	-0.380267	0.0486	0
COL22A1	chr7:109509147-109749930	2.07877	1.82191	-0.190279	3.407	2.07435	-0.715841	4.28087	3.50436	-0.288753	4.85633	3.61495	-0.42589	3.61185	2.69823	-0.420723	0.04885	0
SNHG11	chr3:149094247-149101183	40.4333	35.4005	-0.191775	54.0947	32.9111	-0.716914	97.4585	74.1638	-0.394073	90.1052	61.3311	-0.554992	69.3323	49.8136	-0.476989	0.0011	0
COL12A1	chr8:84641357-84760142	0.817649	0.692786	-0.239072	1.07218	0.74698	-0.521403	1.58207	1.32586	-0.254885	1.89009	1.00155	-0.916211	1.32145	0.925932	-0.513144	0.04305	0
PRSS56	chr9:85989071-85993974	5.86987	9.86374	0.748806	6.45595	8.22307	0.349047	7.41858	19.8925	1.42301	67.3021	19.8173	-1.76389	21.0467	14.0903	-0.578889	0.0095	0
COL14A1	chr7:91801533-92032966	0.96573	0.573142	-0.752727	0.528842	0.78686	0.573269	1.37722	1.00357	-0.456609	2.41609	1.1173	-1.11265	1.29507	0.856341	-0.596776	0.0431	0
ITGB4	chr10:106080451-106116632	0.483218	0.300595	-0.684856	0.284672	0.437663	0.620522	1.32753	0.650217	-1.02975	1.22927	0.681989	-0.849979	0.807727	0.507195	-0.671326	0.0493	0
MAL	chr3:115166670-115190432	2.49814	1.94664	-0.359869	1.77085	1.46094	-0.277539	1.7053	3.4612	1.02125	7.12083	1.33874	-2.41117	3.22871	2.02592	-0.672378	0.0379	0
TXNIP	chr2:191356953-191360754	12.2462	7.70857	-0.667796	11.7643	8.86338	-0.408486	18.1241	8.96871	-1.01494	14.1203	9.67488	-0.545452	13.9722	8.74994	-0.675218	0.00045	0
ACTA1	chr19:54081495-54084508	4.9722	2.8745	-0.790574	2.95544	5.33405	0.851859	7.43063	6.32051	-0.233443	19.1397	6.11894	-1.64521	8.40612	5.08174	-0.726119	0.01045	0
SERPING1	chr3:67968793-67978636	11.6622	10.9475	-0.0912287	12.912	18.7866	0.540991	138.175	30.2337	-2.19227	21.9413	49.5609	1.17556	44.112	26.5547	-0.732204	0.00075	0
SMPDL3A	chr20:36821915-36844891	1.00057	1.39872	0.483288	1.71894	1.41866	-0.276992	9.59907	2.55652	-1.90872	1.50386	2.58647	0.782313	3.32688	1.95016	-0.770575	0.0417	0
MXI1	chr1:259508901-259592797	2.73569	1.63207	-0.745198	6.31189	2.32267	-1.44229	0.566772	0.734957	0.37489	0.492089	1.27128	1.36929	2.64152	1.51523	-0.801827	0.02245	0
GNAS	chr3_random:1609396-1611359	3.70348	2.22208	-0.736968	2.45181	3.47144	0.501686	10.0565	2.49914	-2.00862	1.79351	1.86027	0.0527233	4.4156	2.52517	-0.806226	0.04225	0
DSG1A	chr18:12127028-12158022	0.716943	0.576448	-0.314667	0.810403	0.610869	-0.407776	0.842848	0.752814	-0.16298	2.4319	0.512744	-2.24577	1.18162	0.610427	-0.952879	0.00615	0
SDC1	chr6:32253319-32275812	0.29971	0.389405	0.377703	0.712778	0.52014	-0.454553	0.501818	2.03024	2.01642	6.3913	1.15123	-2.47293	1.90888	0.98545	-0.953872	0.012	0
KRT15	chr10:89071915-89075732	0.70831	0.382563	-0.888682	0.383086	0.455275	0.249069	0.44677	16.2059	5.18084	31.8194	0.409526	-6.27981	7.98	4.10854	-0.957764	0.00565	0
CXCL13	chr14:15126331-15131368	1.69379	3.1206	0.881568	1.72679	3.26606	0.91946	30.6758	5.37877	-2.51175	3.48053	6.99322	1.00665	8.92299	4.58834	-0.959556	0.0052	0
CRYGD	chr9:63711050-63712662	1.55368	16.7706	3.43217	23.1779	4.70763	-2.29967	123.823	2.07133	-5.90157	18.7997	52.4629	1.48059	40.015	18.4955	-1.11337	0.00035	0
APOBEC1	chr4:159033169-159048108	1.13954	0.439579	-1.37426	0.440563	0.549334	0.318338	4.87731	1.06148	-2.20001	0.957841	1.24031	0.372837	1.7905	0.800755	-1.16093	0.02665	0
LCN2	chr3:11511401-11514747	20.477	14.2564	-0.522399	16.3634	27.5352	0.750803	306.025	40.8938	-2.9037	23.6142	72.0007	1.60835	87.0939	37.4947	-1.21589	5e-05	0
IL17RB	chr16:5335805-5349160	0.82598	0.991432	0.263408	0.99228	0.707881	-0.48724	5.94133	1.03883	-2.51582	0.43322	0.641194	0.565662	1.97666	0.843409	-1.22876	0.00645	0
CRYGE	chr9:63698608-63701230	0.445111	4.80455	3.43216	6.29445	1.7165	-1.87461	46.3513	1.27776	-5.18092	4.495	14.8451	1.72359	13.709	5.51214	-1.31444	0.0019	0
EMP1	chr4:172315121-172335536	3.20082	3.39567	0.0852544	1.3914	1.78241	0.357292	2.73194	6.24305	1.19233	28.7353	2.39288	-3.586	8.70898	3.39413	-1.35946	0.00635	0
COL17A1	chr1:253012166-253059385	0.461446	0.292259	-0.658916	0.360914	0.414224	0.198758	0.447036	0.617849	0.466862	3.78185	0.577403	-2.71144	1.22427	0.466701	-1.39135	0.00025	0
PI16	chr20:7636281-7645221	0.813634	0.769066	-0.0812733	1.04483	1.42184	0.444494	1.93195	2.53437	0.391571	14.0122	1.69299	-3.04904	4.28509	1.56861	-1.44984	0.0002	0
EVPL	chr10:106336952-106353217	0.225884	0.32032	0.503932	0.335446	0.136117	-1.30123	0.188561	1.04137	2.46537	4.08768	0.256396	-3.99483	1.16721	0.42479	-1.45824	0.0003	0
COL3A1	chr9:44281581-44317831	0.931103	1.2624	0.439162	1.30157	1.90108	0.546564	2.93314	4.73971	0.69235	27.0179	3.40898	-2.9865	7.71919	2.74443	-1.49194	5e-05	0
COL1A2	chr4:29393502-29429101	0.254512	0.359585	0.498596	0.367049	0.604037	0.718664	0.590712	1.84123	1.64014	10.2969	1.2034	-3.09703	2.75767	0.967607	-1.51096	5e-05	0
RPS12	chr1:22265325-22267482	39.2653	26.5599	-0.564001	12.2781	1.63753	-2.90649	58.4514	16.6795	-1.80916	39.5904	4.72338	-3.06726	36.8196	12.5082	-1.5576	0.0001	0
SERPINA3N	chr6:128461774-128469309	0.871382	1.18906	0.44844	0.842967	1.19388	0.502115	27.4994	4.18887	-2.71477	0.432985	2.49218	2.52502	7.00043	2.19499	-1.67323	5e-05	0
PERP	chr1:13976355-13988802	0.460516	0.386924	-0.2512	0.332001	0.493339	0.57139	0.84815	2.66926	1.65405	13.3525	0.87142	-3.9376	3.59205	1.06156	-1.75863	5e-05	0
AQP5	chr7:138337730-138341257	0.570942	0.693793	0.281161	0.386152	0.619275	0.68141	1.2206	1.10033	-0.149654	9.65437	0.819916	-3.55764	2.84133	0.797233	-1.83349	0.0006	0
FAM83A	chr7:94692897-94717221	0.204014	0.293826	0.526296	0.367913	0.262264	-0.488347	0.372773	0.315063	-0.242657	3.97507	0.260886	-3.92949	1.18626	0.282063	-2.07233	0.0028	0
COL1A1	chr10:83622437-83639368	0.334496	0.191325	-0.805965	0.191293	0.152107	-0.330696	0.552682	1.70039	1.62134	12.5812	1.19061	-3.40151	3.26836	0.768058	-2.08928	5e-05	0
ALDH3A1	chr10:47365194-47374880	1.75669	1.59155	-0.142423	2.51296	1.74834	-0.523403	1.5224	5.45617	1.84154	87.3256	2.09949	-5.3783	22.3051	2.65218	-3.07213	5e-05	0
B3GALTL	chr12:5664793-5750164	2.74069	3.06311	0.160461	2.62914	3.75866	0.515624	4.28206	4.6625	0.122799	2.81524	5.77236	1.0359	3.09671	4.24853	0.456226	0.0505	0
CD83	chr17:26705645-26725470	13.6093	12.4032	-0.133872	12.7965	13.506	0.0778514	16.9858	18.2166	0.100926	11.5768	27.9661	1.27244	13.734	17.6753	0.363985	0.05105	0
DIO1	chr5:128385701-128404015	14.764	11.3453	-0.379992	14.8021	11.2257	-0.398996	13.4978	11.259	-0.261648	18.5426	13.2253	-0.487539	15.4132	11.7077	-0.396714	0.05295	0
FAM38A	chr19:52765785-52834347	4.95108	5.47253	0.144463	4.06029	4.70373	0.212223	6.82761	7.85237	0.201747	4.46796	8.33482	0.899534	5.05258	6.48564	0.360228	0.05335	0
HES1	chr11:72603481-72605699	5.10549	5.43352	0.0898382	4.71301	5.13955	0.124993	8.71675	13.8079	0.663637	12.2249	19.5711	0.678896	7.5576	10.6196	0.490733	0.05395	0
CXCL10	chr14:17198267-17280642	1.51176	5.4085	1.839	3.27449	5.10135	0.63961	3.51706	3.74508	0.0906294	4.01981	8.07944	1.00713	3.04763	5.55243	0.865432	0.05435	0
RGS11	chr10:15469911-15478150	21.0381	17.8053	-0.240694	27.7678	20.6714	-0.425778	37.9068	27.9817	-0.437976	35.4863	32.3373	-0.134063	30.2583	24.3068	-0.315972	0.0544	0
APOE	chr1:79003606-79007561	938.041	959.102	0.032033	1106.97	1350.38	0.286751	1550.7	1734.83	0.161871	1271.07	2139.17	0.751011	1207.72	1518.05	0.329932	0.05525	0
USP12	chr12:8757237-8813533	40.1232	28.7554	-0.480602	36.9077	24.0345	-0.618815	23.6593	23.1716	-0.0300489	24.8628	20.8905	-0.251147	31.8754	24.2938	-0.391857	0.05535	0
RENBP	chrX:159849351-159858411	3.06351	6.07943	0.988751	4.08611	5.28906	0.372285	7.11645	9.21528	0.372871	4.03607	6.53162	0.694492	4.52172	6.69708	0.566658	0.0556	0
RAPGEF3	chr7:136452944-136474659	1.67625	1.43728	-0.221892	1.29369	1.89835	0.553253	1.93358	2.28587	0.241469	1.2474	3.7146	1.57428	1.53747	2.28796	0.573504	0.0558	0
MGST1	chr4:175248653-175263881	9.1599	12.8171	0.484671	9.51236	13.5578	0.511245	25.8679	29.0162	0.165695	18.8884	31.8426	0.753453	15.5085	21.2349	0.453376	0.0566	0
LOC690806	chr17:29430962-29445347	20.5235	14.1981	-0.531584	22.6432	13.9518	-0.698627	5.78	3.89287	-0.570233	7.20071	3.29541	-1.12768	14.5001	9.13037	-0.667321	0.0575	0
MLC1	chr7:127265490-127288102	159.111	142.09	-0.163222	163.324	157.509	-0.0523032	253.862	132.071	-0.942733	119.007	139.275	0.226894	173.238	142.8	-0.278758	0.05755	0
THBD	chr3:137158954-137162607	1.55314	1.33715	-0.216027	1.07498	1.91864	0.83577	2.80113	2.98741	0.0928818	2.29977	5.03127	1.12943	1.90123	2.73971	0.527093	0.0576	0
COLGALT2	chr13:67354276-67461263	4.16426	4.67796	0.167819	3.88549	4.76781	0.295232	4.50338	4.89324	0.119782	4.28029	8.08534	0.917599	4.2078	5.5403	0.396901	0.0581	0
CHP1	chr5:71383788-71385433	0.206524	0.334567	0.695988	0.223734	0.39823	0.831815	0.904849	1.4108	0.640764	0.257124	1.94469	2.919	0.387231	0.980081	1.33971	0.0582	1
SLC4A5	chr4:117432384-117515453	7.33571	6.64881	-0.141839	7.76603	6.97783	-0.1544	7.21416	8.37076	0.214528	5.04978	14.1287	1.48434	6.89306	8.8774	0.364994	0.05825	0
STC1	chr15:49566884-49578955	8.60545	8.0192	-0.101791	7.50405	6.99161	-0.102046	17.2435	9.28069	-0.893745	12.732	10.3087	-0.304598	11.3434	8.56216	-0.405813	0.0583	0
MTAP	chr5:108788724-108861905	0.901363	1.655	0.876647	0.878434	1.91187	1.12198	1.34479	1.99669	0.570234	0.829195	1.91416	1.20693	0.984149	1.85932	0.917829	0.0585	1
ADAMTS18	chr19:43721462-43896253	0.997706	1.3044	0.386703	0.600433	1.09681	0.869238	0.641595	0.580366	-0.144699	0.851972	2.02263	1.24735	0.777208	1.24587	0.680786	0.05945	0
MCAM	chr8:47121604-47127934	18.042	16.3509	-0.14199	17.6953	16.0286	-0.142713	30.5948	18.196	-0.749663	15.6239	14.8307	-0.0751704	20.3581	16.3019	-0.32056	0.05985	0
IFI27	chr6:127725193-127731665	52.5804	82.7604	0.654415	49.907	87.346	0.8075	108.067	91.9107	-0.233624	110.946	135.649	0.290028	78.9157	98.3191	0.317159	0.0601	0
CAPG	chr4:105845189-105862113	1.34288	1.25922	-0.0928049	1.45565	0.690683	-1.07557	5.52561	5.40984	-0.0305474	8.02285	2.37567	-1.75578	3.94833	2.33965	-0.754952	0.06045	0
RYR1	chr1:84116099-84254639	0.736747	0.600091	-0.295988	1.05248	0.715808	-0.556142	1.41606	1.07891	-0.392314	1.41515	1.06545	-0.409494	1.14259	0.850285	-0.426294	0.0611	0
PDE2A	chr1:158921606-159013840	9.81063	12.7642	0.379682	11.5386	11.9093	0.0456146	13.652	14.9766	0.133595	11.0738	17.9452	0.696447	11.4904	14.2421	0.309731	0.06125	0
F3	chr2:218371049-218382645	18.9583	24.5518	0.372995	21.213	26.3907	0.315078	30.5897	40.8521	0.417366	27.9427	31.873	0.189863	24.4646	30.5075	0.318469	0.06215	0
SLC7A3	chrX:89159609-89164314	14.8585	16.6264	0.162189	14.4338	18.9443	0.392309	18.9924	27.5126	0.534674	20.5368	24.1903	0.236218	17.1041	21.5175	0.331166	0.0638	0
TGFB2	chr13:102717738-102819661	88.21	98.4425	0.158339	83.0478	102.763	0.307313	109.224	128.704	0.236766	89.2192	123.537	0.46952	92.2226	112.31	0.284296	0.0666	0
ASF1B	chr19:25867383-25881909	0.186583	0.671824	1.84826	0.470977	0.659607	0.485949	0.384588	0.866908	1.17257	0.63441	1.19664	0.915499	0.415126	0.835788	1.00959	0.0672	1
SLC7A1	chr12:7230518-7253858	4.2326	5.66258	0.419916	3.98367	5.56487	0.48225	4.71216	6.36962	0.43482	4.97012	4.86355	-0.031272	4.46523	5.60124	0.327012	0.06735	0
SLAMF9	chr13:88480176-88482957	0.859245	1.23735	0.526115	1.4476	0.368188	-1.97515	6.91059	1.52751	-2.17763	0.557185	2.09407	1.91008	2.36215	1.27477	-0.889872	0.0676	0
KRT18	chr2:80043182-80044568	0.43965	0.63318	0.526261	0.237899	0.777118	1.70779	1.35227	3.1603	1.22468	1.29955	2.01836	0.635174	0.806358	1.5857	0.975629	0.0679	1
LRAT	chr2:174636381-174645444	1.02303	0.666696	-0.617752	0.876971	1.09596	0.321598	2.69124	0.437441	-2.62111	0.453969	1.07585	1.2448	1.24217	0.82035	-0.598548	0.06795	0
S100B	chr20:12791286-12824517	48.2942	61.2356	0.342521	56.1679	76.2404	0.440809	103.978	113.844	0.130787	64.1357	96.2579	0.585778	67.3071	85.5589	0.346159	0.06915	0
GIPR	chr1:78515050-78526160	1.48481	1.42181	-0.0625447	2.80825	1.23637	-1.18356	5.66352	4.55851	-0.313136	5.42613	3.6913	-0.555794	3.75578	2.63594	-0.510797	0.07125	0
GDPD2	chrX:88744484-88753272	10.8864	8.66169	-0.329804	10.4549	9.64508	-0.116312	17.1608	10.9884	-0.643133	14.4403	12.5373	-0.203879	13.1159	10.3532	-0.341234	0.0716	0
LIPT1	chr9:36822119-36827479	0.727482	0.500137	-0.540588	0.679	0.255056	-1.4126	1.05962	0.57154	-0.890619	1.28691	0.878758	-0.55037	0.927621	0.540048	-0.780448	0.0722	0
KLF4	chr5:73446799-73451815	2.58766	1.52401	-0.763774	2.18365	2.26372	0.0519498	2.80821	3.26136	0.215824	5.90137	2.20072	-1.42308	3.32905	2.28008	-0.546026	0.07235	0
CPM	chr7:56931919-56992248	2.82304	3.40994	0.272494	3.44313	3.80755	0.145141	4.24417	5.54256	0.38507	3.15979	5.07965	0.684899	3.4064	4.397	0.368271	0.0727	0
C1QC	chr5:155656103-155659430	13.8602	13.8083	-0.00541123	12.6891	13.8809	0.12951	73.8729	31.334	-1.23731	24.0205	36.0203	0.584543	30.0678	23.1061	-0.379943	0.07375	0
CBR1	chr11:33787956-33790320	4.87474	6.48875	0.412615	3.56283	4.80915	0.432759	5.09601	5.39465	0.0821598	4.39695	11.0443	1.32873	4.47852	6.84464	0.61195	0.0739	0
WSB1	chr10:65427130-65443413	53.6066	43.7502	-0.293121	55.6758	48.0109	-0.213688	89.8882	77.3879	-0.216025	88.6216	71.7296	-0.305091	71.1276	59.2001	-0.264812	0.0771	0
APLN	chrX:134387284-134396776	1.80942	2.39624	0.405246	1.48219	2.16663	0.547722	1.2628	2.48106	0.97433	1.77088	2.26296	0.353743	1.59022	2.3187	0.544092	0.07965	0
SUDS3	chr12:40668590-40692489	41.6851	26.3207	-0.663334	36.1908	25.0595	-0.530265	26.8954	29.8803	0.151836	29.6485	27.8996	-0.0877146	34.0017	27.1292	-0.325761	0.0817	0
PDPN	chr5:162142250-162175921	29.3077	33.6734	0.200327	35.2218	46.3793	0.397012	87.1274	82.8246	-0.0730669	45.9691	77.4968	0.753472	48.4551	58.7145	0.277069	0.0818	0
TSKU	chr1:155611068-155622378	2.02923	3.03836	0.582363	2.27019	2.4027	0.0818432	3.54209	4.66495	0.397261	3.25866	5.55761	0.770184	2.7451	3.8356	0.482591	0.08195	0
EMR1	chrUn:64717305-64825222	5.196	4.33492	-0.261395	4.1486	4.00779	-0.0498174	10.9612	5.04529	-1.1194	4.10457	5.20107	0.341579	6.02291	4.60795	-0.386335	0.08485	0
TMCO4	chr5:157796781-157850453	0.402373	1.52122	1.91862	0.290242	0.581916	1.00355	1.05734	1.19156	0.172411	0.284213	0.617756	1.12006	0.499068	0.981488	0.975735	0.08555	0
CCND1	chr1:205357234-205366757	6.24084	7.92061	0.343873	7.51937	9.28295	0.303972	10.0026	11.6498	0.219934	9.6275	12.9067	0.422885	8.28133	10.3022	0.315019	0.08595	0
IFI27L2B	chr6:127733539-127735026	5.69681	15.5931	1.45268	1.92097	7.18175	1.9025	15.5517	16.8376	0.114615	5.78196	9.25918	0.679328	7.04463	12.149	0.786244	0.08685	0
SEC31B	chr1:249567755-249593300	3.03428	2.40577	-0.334856	4.01852	2.50085	-0.684247	5.92225	4.46005	-0.409084	5.21163	4.55383	-0.194654	4.49659	3.40961	-0.399225	0.08695	0
FAM46C	chr2:195462848-195481953	1.0746	1.56464	0.542033	1.36396	2.25234	0.723616	1.42281	1.49477	0.0711852	0.681354	1.99393	1.54914	1.14124	1.82611	0.678173	0.08745	0
WIPI1	chr10:98722265-98753713	39.7076	49.2731	0.311383	36.8395	50.5653	0.456893	63.6869	70.7677	0.152093	40.0861	48.0164	0.260427	44.7547	54.2283	0.277005	0.08845	0
TRIL	chr4:82177049-82182324	53.6098	59.1818	0.142656	53.1453	62.2914	0.229092	36.2396	44.9801	0.31172	33.6933	44.8446	0.412473	44.7965	53.1714	0.247265	0.089	0
MAMDC2	chr1:226590899-226755601	10.2246	13.0276	0.349539	10.9035	16.1462	0.56641	18.9459	20.5398	0.116538	16.3837	19.5581	0.255501	13.9395	17.1061	0.295332	0.0906	0
RPL37A	chr9:71840484-71841925	786.848	1599.54	1.0235	683.257	1010.15	0.564069	983.38	1014.34	0.0447231	878.031	1055.02	0.264922	829.202	1176.08	0.504188	0.09105	0
LYZ2	chr7:56607707-56613004	20.6622	20.5925	-0.00487119	24.8694	23.4265	-0.0862303	104.35	41.0106	-1.34737	18.4078	48.5967	1.40054	40.8907	32.6359	-0.325311	0.09115	0
IRAK4	chr7:133055184-133081614	1.59756	1.12181	-0.510045	1.85646	1.46327	-0.343351	3.27228	2.0013	-0.709357	2.37356	1.43071	-0.730325	2.24697	1.48713	-0.595451	0.09155	0
CCL2	chr10:70256262-70258061	0.15923	0.171924	0.110657	0.518497	0.92109	0.829006	1.04627	1.64751	0.655028	0.768299	2.91455	1.92354	0.607321	1.35723	1.16014	0.09235	0
ITGA8	chr17:86427196-86649274	1.54356	1.33417	-0.210318	2.03229	1.14807	-0.823902	3.15098	2.68095	-0.233055	2.93089	2.2048	-0.410688	2.38338	1.80139	-0.4039	0.0925	0
STBD1	chr14:17031751-17035157	0.935538	1.64892	0.817651	1.33108	1.89894	0.512593	0.816911	1.61171	0.980338	0.71699	1.22097	0.768003	0.962094	1.60159	0.735253	0.09305	1
CDH1	chr19:36442692-36512091	1.73171	1.48386	-0.222843	1.05359	1.47773	0.488065	1.56279	1.76305	0.173947	2.49854	4.90414	0.972918	1.70036	2.34659	0.464725	0.0934	0
FZD2	chr10:91709178-91712641	1.55438	2.05823	0.405066	1.84435	1.78025	-0.0510334	3.02566	2.62443	-0.205247	1.20642	5.41566	2.1664	1.89623	2.90059	0.613212	0.09375	0
COL5A1	chr3:6825780-6973521	2.6134	2.26159	-0.208593	2.68501	2.22625	-0.270314	7.70985	7.65083	-0.0110864	5.8027	11.9317	1.04	4.59291	5.7767	0.330836	0.0939	0
HFE	chr17:48469925-48478502	0.526326	0.821229	0.641828	0.873626	0.902344	0.0466623	1.05015	1.22535	0.222592	0.487749	2.42417	2.31328	0.73262	1.31138	0.839951	0.09495	0
OCLN	chr2:31317090-31367485	1.93594	2.80412	0.53451	2.0684	2.68701	0.37749	3.88985	3.88377	-0.00225571	2.94616	4.98665	0.759235	2.67408	3.53131	0.40116	0.095	0
RELN	chr4:8150748-8609281	20.5176	21.0053	0.0338915	14.5859	19.9965	0.455175	36.143	44.1275	0.287963	34.533	41.6724	0.271116	26.0055	30.9482	0.251039	0.095	0
AKIP1	chr1:167324918-167344180	1.75908	0.2339	-2.91085	1.29077	0.537922	-1.26277	2.055	1.99881	-0.0399947	2.33137	1.38076	-0.755711	1.84561	0.99537	-0.890796	0.09515	0
OCEL1	chr1_random:2090988-2092757	1.10836	0.997566	-0.151937	2.00045	2.58245	0.368414	0.876008	0.422856	-1.05078	0.694297	4.5481	2.71164	1.19292	2.1106	0.823161	0.09515	0
RACGAP1	chr7:138366355-138395716	1.11633	1.36679	0.292034	0.884852	1.8656	1.07613	1.06069	1.75044	0.722714	1.41248	1.91533	0.439356	1.11555	1.71313	0.618889	0.0956	0
GPR4	chr1:78586540-78588029	0.872519	0.797477	-0.129744	0.726198	1.61775	1.15555	1.61026	2.85162	0.824486	1.42218	2.42145	0.767767	1.13993	1.87283	0.716279	0.0962	0
NES	chr2:180051906-180060948	2.04135	2.55622	0.32449	2.70715	3.42589	0.339704	3.8055	4.56247	0.261728	2.1426	3.26384	0.607205	2.65913	3.41412	0.360563	0.09675	0
PMEL	chr7:2007881-2045336	0.498371	1.61514	1.69637	1.37157	1.13573	-0.272199	3.23973	2.08741	-0.63416	1.19997	9.4915	2.98364	1.53924	3.44392	1.16183	0.0971	0
SPTA1	chr13:89951923-90028590	1.30627	1.27254	-0.0377408	1.31814	1.46592	0.153305	0.392033	1.31858	1.74994	1.14502	1.70251	0.572292	1.05984	1.432	0.434183	0.09715	0
CTGF	chr1:21327099-21330215	25.8497	31.1858	0.270743	29.7885	35.2597	0.243263	45.0277	33.6903	-0.418478	23.3129	48.5848	1.05938	30.8376	36.851	0.257012	0.0985	0
TTR	chr18:12406468-12413682	4.71016	18.9161	2.00577	7.77884	9.62702	0.307534	22.606	11.126	-1.02277	7.60381	20.3932	1.42329	10.4129	14.9527	0.522043	0.0986	0
PNISR	chr5:36598470-36625381	50.9506	44.4913	-0.195578	60.4489	44.3562	-0.446581	77.7856	71.8319	-0.114878	83.5535	72.1466	-0.211768	67.6345	57.2344	-0.240878	0.0991	0
CLEC4A3	chr4:159464409-159474023	0.638157	1.03354	0.695617	0.346339	1.2305	1.82899	6.70821	0.825234	-3.02305	1.41104	1.28469	-0.135333	2.16925	1.09306	-0.988821	0.09965	0
C3	chrUn:64513124-64539808	41.7141	35.7927	-0.220871	28.8926	37.4157	0.372944	84.375	41.2169	-1.03358	32.4214	42.9706	0.406406	46.2144	39.087	-0.241656	0.09975	0
SLCO2A1	chr8:108012828-108099184	0.788772	0.766954	-0.0404692	0.624983	1.29285	1.04866	1.01063	1.0156	0.00708478	0.730597	1.75315	1.2628	0.785593	1.19297	0.602705	0.10125	0
GSDMD	chr7:113832419-113837007	3.75496	6.48248	0.787748	2.75877	4.62664	0.745938	5.20475	5.71107	0.133932	5.41084	6.68827	0.30578	4.23581	5.84685	0.465022	0.1019	0
KCNG2	chr18:77190050-77258811	0.53221	1.89722	1.83382	1.6116	1.94989	0.274894	1.39542	0.993498	-0.490111	0.591235	1.85194	1.64723	1.03424	1.6845	0.703756	0.1034	0
CIDEA	chr18:63871537-63896975	0.635102	0.823	0.373903	0.413154	0.857238	1.05302	1.18566	3.05017	1.3632	2.1842	3.68652	0.755152	1.07643	2.02295	0.910211	0.1044	0
THEMIS2	chr5:152349540-152364664	0.625137	1.66232	1.41095	0.41597	1.25181	1.58947	0.731723	0.637467	-0.198948	0.659484	0.63386	-0.0571733	0.604662	1.06934	0.822516	0.1046	0
TMEM171	chr2:29301091-29310650	0.195947	0.31744	0.696023	0.636712	0.566753	-0.16792	1.12541	0.521878	-1.10867	1.71288	0.222017	-2.94769	0.891979	0.407665	-1.12963	0.10465	0
FKBP9	chr4:85816059-85865958	7.26873	7.75643	0.0936896	7.36761	7.53954	0.0332796	8.1424	8.66426	0.0896219	6.10907	13.1778	1.10908	7.24011	9.1649	0.340108	0.1059	0
FCHO1	chr16:18904593-18921885	7.73119	6.68683	-0.209367	9.99344	7.20922	-0.471139	14.4838	12.8256	-0.175407	15.8907	12.6076	-0.333886	11.8729	9.63341	-0.301552	0.10685	0
PLOD2	chr8:97525278-97623151	10.2347	11.2859	0.141051	10.124	11.1888	0.144283	13.9621	15.4846	0.149311	11.7311	18.2061	0.634084	11.4599	13.8394	0.272186	0.1086	0
OSMR	chr2:56080699-56121463	3.47889	2.70877	-0.360987	2.98051	2.74982	-0.116221	8.54365	4.78099	-0.837544	2.93038	3.31012	0.175793	4.41172	3.33893	-0.401956	0.10925	0
MMP14	chr15:32493750-32503076	14.4273	17.8887	0.310254	15.8264	21.621	0.450099	39.2721	35.8775	-0.130426	22.4891	35.9118	0.675231	22.5736	27.2641	0.272365	0.11005	0
TNFRSF11A	chr13:11957983-12015169	0.804287	0.905108	0.17038	0.724357	1.45398	1.00523	1.86719	1.50038	-0.315542	0.666419	2.2259	1.73989	1.0013	1.49643	0.579649	0.1107	0
IFIT3	chr1:238571299-238576441	3.08014	4.23487	0.459323	2.32115	4.22959	0.865676	3.64997	3.56891	-0.0324026	3.80336	5.68547	0.580003	3.19337	4.40795	0.465029	0.1112	0
PKP1	chr13:48910027-48958983	1.6673	1.51479	-0.138396	1.80102	1.5162	-0.248356	1.80716	1.90385	0.0752006	3.25547	1.34295	-1.27746	2.11789	1.56222	-0.439024	0.11155	0
SLIT1	chr1:246813908-246964408	8.95522	8.08397	-0.147665	8.08263	7.66857	-0.0758677	11.9237	13.1876	0.145353	8.03009	16.6205	1.04948	9.22148	11.1524	0.274282	0.11175	0
GATSL3	chr14:84840814-84845228	1.70879	1.49084	-0.196849	1.13773	1.90097	0.740586	2.07374	3.25154	0.648892	3.01055	5.4021	0.843492	1.95821	2.92477	0.578788	0.1119	0
RAMP2	chr10:90275358-90277242	6.99231	12.1781	0.800449	9.13969	13.6465	0.578318	11.6246	14.2786	0.296676	10.7509	13.5061	0.329156	9.55618	13.338	0.481034	0.11395	0
KIF1C	chr10:57580645-57624827	23.6156	28.6387	0.278223	25.0639	28.4778	0.184225	25.4859	28.5212	0.162338	20.427	26.0824	0.352595	23.7314	27.9005	0.233496	0.1142	0
TGFA	chr4:120355648-120437774	3.03383	3.79412	0.322625	2.82841	3.54617	0.32627	2.83934	3.58091	0.334772	2.15438	3.18809	0.565417	2.73166	3.52777	0.368976	0.115	0
LOC290595	chr16:13308802-13316409	0.342316	1.66313	2.2805	1.30098	1.15509	-0.171593	1.78983	3.39631	0.924143	12.1694	2.74054	-2.15073	3.75452	2.18382	-0.781777	0.1181	0
RGD1560289	chr4:126114045-126151110	0.623485	0.80189	0.36305	0.481242	1.05914	1.13806	0.849341	1.28507	0.59743	0.874779	1.20889	0.466692	0.700308	1.07614	0.619808	0.11825	0
MATN2	chr7:69715529-69882871	0.808145	1.01861	0.333922	0.669455	1.58433	1.24281	2.35256	2.10165	-0.162714	0.8184	1.9857	1.27877	1.13782	1.6452	0.531991	0.1191	0
MICU1	chrUn:41874915-42001350	12.0876	17.1372	0.503609	10.5568	17.3598	0.717581	14.7015	15.3509	0.062359	13.5867	13.4642	-0.0130718	12.6827	15.875	0.323894	0.1196	0
SNRNP70	chr1:95847849-95868393	153.184	140.959	-0.119988	220.977	156.78	-0.495157	311.576	301.61	-0.0468987	358.63	296.46	-0.274658	257.502	218.85	-0.234642	0.1196	0
BBS12	chr2:123860639-123869150	8.06537	5.0302	-0.681125	7.86508	5.57162	-0.497366	4.93233	6.11452	0.309969	6.76108	5.11089	-0.403678	6.9867	5.4331	-0.362834	0.12025	0
PDGFRA	chr14:35369421-35418126	6.1053	6.73858	0.142383	6.16735	7.38348	0.259649	7.69923	7.6326	-0.0125397	5.44736	8.95029	0.716377	6.35274	7.62014	0.262438	0.12025	0
FCN1	chr3:3797915-3801117	0.330156	0.534902	0.696125	1.07225	0.238736	-2.16715	2.97715	1.89845	-0.649108	1.17865	0.439943	-1.42175	1.34897	0.752434	-0.842224	0.12095	0
FOS	chr6:109559134-109562550	14.1738	14.5496	0.0377498	12.7607	17.4498	0.451501	26.1582	27.3877	0.0662658	16.8289	27.4995	0.708462	17.276	21.3192	0.303385	0.122	0
CCDC130	chr19:25582028-25589845	6.3638	6.25545	-0.0247742	7.50437	4.66305	-0.686457	12.6713	10.686	-0.245838	15.4039	11.0113	-0.484306	10.3125	7.97418	-0.370985	0.1228	0
ZFP36L2	chr6:7530952-7534988	36.5052	35.0484	-0.058755	37.4355	43.252	0.208362	52.0192	60.0831	0.207914	50.9957	70.0134	0.457255	43.9265	51.1824	0.220556	0.12345	0
SLC7A2	chr16:54752118-54805406	2.61126	2.54288	-0.0382824	1.5901	2.19851	0.467412	1.66238	1.70162	0.0336644	1.36469	3.84437	1.49418	1.82885	2.55486	0.482311	0.12375	0
HDAC10	chr7:127423735-127428853	4.92694	4.29713	-0.197318	7.69731	6.62435	-0.216575	12.038	7.10569	-0.760554	11.5884	9.93865	-0.22156	8.92291	6.88078	-0.374941	0.1242	0
STX1A	chr12_random:690406-731265	1.80584	4.23474	1.2296	2.95235	4.88358	0.726075	1.2209	1.03244	-0.241886	2.68688	1.9166	-0.487388	2.18524	3.10216	0.505477	0.12575	0
IGFLR1	chr1:85611298-85613177	1.20513	1.11569	-0.111253	1.77078	0.829929	-1.09332	2.1055	0.790597	-1.41315	2.0926	1.57019	-0.414355	1.77958	1.06849	-0.735969	0.1262	0
ZC2HC1C	chr6:109333911-109343371	0.776756	1.19868	0.625914	0.720092	1.17685	0.708678	0.650099	0.948344	0.54475	0.331442	0.899883	1.44098	0.627826	1.0614	0.757531	0.12775	1
TEAD2	chr1:95693134-95715116	3.01101	3.74978	0.316558	2.85832	3.86822	0.436503	3.56365	5.46334	0.616429	4.35325	6.78618	0.640508	3.42739	4.88529	0.511334	0.1279	0
SLC44A5	chr2_random:3473470-3477966	1.19631	0.775149	-0.626048	1.16706	0.115339	-3.33893	0.480198	0.360362	-0.414184	0.295112	0.268091	-0.138536	0.808806	0.383798	-1.07545	0.1283	0
ACYP2	chr14:111511939-111512680	7.92272	13.3886	0.756934	8.60335	14.1142	0.714182	23.1777	24.4175	0.0751807	19.3892	26.6857	0.460816	14.4288	19.2475	0.415721	0.1291	0
LOC690349	chr1:211562022-211563989	17.9212	23.0167	0.361016	30.3568	20.9955	-0.53194	79.9931	60.6062	-0.400409	110.06	85.7806	-0.35957	57.7505	45.951	-0.329738	0.13155	0
COL6A1	chr20:12320079-12338486	2.18833	1.05899	-1.04714	2.41341	1.91209	-0.335923	3.43087	3.51023	0.0329881	5.07799	3.67266	-0.467432	3.23287	2.46747	-0.389781	0.13175	0
COL11A1	chr2:209996466-210193800	11.9232	9.51183	-0.325974	15.5135	10.982	-0.498379	27.5336	25.5388	-0.108503	27.3965	25.191	-0.121085	20.244	17.3039	-0.226401	0.13285	0
RPE65	chr2:257846391-257879314	0.904712	1.1945	0.400882	0.597865	1.11457	0.8986	1.38913	1.91841	0.465732	1.11868	2.10205	0.910004	0.990507	1.55293	0.648751	0.13495	0
SLC38A5	chrX:26244420-26253588	0.468087	0.6742	0.526402	0.337469	1.20348	1.83438	2.36981	2.59058	0.128499	0.889525	2.01216	1.17764	0.980826	1.57399	0.682359	0.1351	0
FCGR2A	chr13:86898650-86911743	2.55814	1.61186	-0.666369	2.69136	1.98682	-0.437873	5.25097	2.90372	-0.854683	3.36504	3.15716	-0.0919985	3.42262	2.3714	-0.529362	0.13525	0
TINAGL1	chr5:149198273-149208283	1.86477	2.34591	0.331144	2.75084	2.7787	0.014539	1.97977	1.95557	-0.0177479	1.75825	5.04029	1.51937	2.10424	2.99502	0.509266	0.13585	0
HHT1	chr6:6606346-6606758	5.52932	9.53388	0.785962	4.25859	11.7269	1.46137	3.97969	5.47482	0.460157	6.16449	6.71179	0.122716	4.99592	8.47596	0.762627	0.1363	0
LRP5	chr1:206102746-206206354	6.66723	8.72376	0.387863	8.30346	9.48365	0.19173	9.41078	9.74995	0.0510812	7.06108	9.69062	0.4567	7.85094	9.36962	0.255125	0.1366	0
BMP7	chr3:163723428-163799567	8.70998	8.79855	0.014597	8.80328	8.90669	0.0168484	7.99351	10.1963	0.351146	8.81266	15.0224	0.769468	8.61183	10.5933	0.298766	0.137	0
CELSR3	chr8:113882882-113923954	23.1273	21.4433	-0.109068	25.0979	20.9019	-0.263929	21.444	22.0303	0.0389182	24.1716	17.1174	-0.49785	23.556	20.3719	-0.209515	0.13705	0
MYOF	chr1:242209177-242372206	0.460164	0.599169	0.380816	0.44598	0.693948	0.637848	0.797146	0.890093	0.159111	0.630479	1.03546	0.715757	0.577077	0.793088	0.458717	0.1374	0
ZCCHC3	chr3:142727644-142730727	14.454	14.1643	-0.0292086	14.8826	14.0454	-0.0835319	44.6236	25.7616	-0.792581	38.2171	34.5332	-0.146235	27.3351	21.592	-0.340255	0.1375	0
IER5L	chr3:9514874-9517551	8.88001	6.62455	-0.422739	8.59552	8.45066	-0.0245211	13.0099	7.50101	-0.794455	7.17485	6.78502	-0.0805952	9.38724	7.33153	-0.356587	0.13765	0
GM13247	chr5:164529907-164748524	0.536935	1.93229	1.84749	0.583198	1.38042	1.24305	1.16568	1.57269	0.432065	1.42368	1.81658	0.351605	0.909117	1.67129	0.878426	0.1379	0
MMD2	chr12:12359068-12406100	46.0165	54.2692	0.237981	47.5166	58.3082	0.295266	72.248	79.8814	0.144902	60.9522	71.9614	0.239546	56.2278	65.3442	0.216776	0.1384	0
AKAP8L	chr7:12889648-12919236	30.3434	30.8686	0.0247537	41.2905	31.7919	-0.37715	73.9434	68.4244	-0.11191	85.2005	66.5646	-0.356105	56.5938	48.1989	-0.231645	0.13925	0
LHX2	chr3:18129454-18147357	30.7039	38.3168	0.319555	33.6903	36.2299	0.104847	41.0448	46.3115	0.174171	33.5437	43.4816	0.374364	34.6636	40.7585	0.233679	0.1394	0
NOTCH2	chr2:192855286-192989188	10.1912	11.3481	0.155127	7.79335	10.7343	0.461919	13.4006	14.2897	0.0926696	9.47637	11.6664	0.299948	10.165	11.9224	0.230054	0.1395	0
PLP1	chrX:124488601-124503645	3.26348	2.89347	-0.173613	4.25576	2.84915	-0.578885	4.78929	3.80038	-0.333666	5.48544	4.19051	-0.388482	4.41993	3.39126	-0.382204	0.13965	0
CYP1B1	chr6:2545653-2553767	5.589	3.79033	-0.560266	4.95172	3.75222	-0.400184	4.51826	3.17099	-0.510833	2.71752	2.56718	-0.0821056	4.49887	3.33935	-0.429997	0.14035	0
HEY2	chr1:27505116-27515204	7.35812	9.14353	0.313415	8.24197	9.59389	0.219127	11.5781	12.8172	0.146689	8.44824	12.5115	0.566527	8.85712	10.8897	0.298059	0.1408	0
BZRAP1	chr10:76052529-76077816	19.049	17.471	-0.124756	21.9437	17.3271	-0.340772	19.9253	20.0703	0.0104615	23.1724	17.9969	-0.364662	21.0454	18.1228	-0.215695	0.14165	0
ID1	chr3:143086154-143087289	17.0207	24.0042	0.495991	17.6279	24.615	0.481675	27.0162	29.5648	0.130057	25.3784	30.2702	0.254296	21.5556	26.8785	0.31839	0.1426	0
VIM	chr17:87847231-87855765	218.475	223.072	0.0300437	210.477	250.613	0.251799	348.352	302.824	-0.202067	185.297	349.637	0.916022	239.406	278.135	0.216323	0.14325	0
ZGPAT	chr3:170498048-170522003	24.7944	24.2825	-0.0300981	33.4568	23.1335	-0.532318	26.2426	22.2575	-0.237618	29.5455	21.6731	-0.447033	28.6078	22.836	-0.325097	0.14415	0
ZFP566	chr1:85114490-85128017	8.72399	7.50235	-0.217645	10.4047	7.28719	-0.513804	12.3375	11.3694	-0.117903	13.6598	9.79991	-0.479099	11.211	8.87154	-0.337654	0.1442	0
IGF2	chr1:202906622-202916730	25.4476	22.7292	-0.162985	24.9727	25.0877	0.00663201	38.296	27.5478	-0.475256	33.603	28.9364	-0.215705	30.3372	25.8789	-0.22931	0.1449	0
LECT1	chr15:60891173-60916953	1.5894	1.79482	0.175361	1.87638	2.57721	0.45786	1.72914	2.83912	0.715389	2.13677	3.76092	0.815658	1.83203	2.70188	0.560522	0.1451	0
SDC4	chr3:155446137-155464825	22.7777	23.3289	0.0345014	24.8995	27.4157	0.138886	32.1896	36.2132	0.169922	33.8186	47.8762	0.501491	28.2283	33.1217	0.230636	0.1451	0
SPON1	chr1:171700390-172022898	91.7214	96.8466	0.0784419	85.3516	101.638	0.251944	104.238	114.754	0.138657	89.0087	117.143	0.396252	92.5464	106.826	0.207015	0.14525	0
TMEM106A	chr10:90602483-90611299	0.233622	0.546835	1.22693	0.420888	0.825906	0.97254	1.43356	1.09804	-0.384677	0.906026	2.2147	1.28949	0.724976	1.13921	0.65203	0.14655	0
EMID1	chr14:85765393-85801932	1.04545	1.19573	0.193764	0.73179	1.423	0.959438	1.6484	2.28662	0.472149	2.09184	3.45627	0.724441	1.35601	2.03825	0.587965	0.14675	0
ARID5A	chr9:35239812-35244452	2.85013	3.16115	0.149424	3.45042	3.33418	-0.0494397	7.13079	4.0206	-0.826651	4.71868	3.19942	-0.560573	4.46351	3.40911	-0.388785	0.1468	0
POLR2I	chr1:85489088-85490526	9.21243	13.1108	0.509107	9.10841	13.3324	0.549667	14.3373	18.7244	0.385152	15.2278	19.6925	0.370941	11.8418	15.9953	0.433758	0.1468	0
MOB3B	chr5:51616231-51809856	14.2998	19.9187	0.478135	15.0597	18.7647	0.317327	8.38847	10.3245	0.299598	9.13461	7.58991	-0.26726	11.9175	14.4303	0.276021	0.1469	0
KIFC2	chr7:114710356-114719463	29.8046	28.5246	-0.0633295	36.7139	33.1996	-0.145161	46.8971	40.1415	-0.224404	47.7238	37.3852	-0.352243	39.9728	34.4822	-0.213168	0.1472	0
GPC4	chrX:138966578-139077074	2.10954	2.42846	0.20311	2.65373	2.40069	-0.144568	3.82767	4.07235	0.089397	1.73312	5.10457	1.55842	2.57077	3.42785	0.415104	0.1475	0
TGM2	chr3:148832866-148862385	7.42825	6.738	-0.140702	7.06709	8.48195	0.26328	12.1423	11.957	-0.0221927	16.6967	8.75508	-0.931373	10.6648	8.87458	-0.265113	0.14875	0
SH3TC2	chr18:57941932-58002841	2.06679	2.98427	0.529984	2.94201	3.166	0.105857	1.66597	2.39901	0.526073	1.4317	2.02286	0.498662	2.05701	2.66241	0.372181	0.1497	0
CDC23	chr18:27100043-27128285	65.5502	57.9088	-0.178817	74.2276	60.3582	-0.298406	60.5389	59.8279	-0.0170443	74.0032	60.8917	-0.281342	68.8334	59.5631	-0.208689	0.1499	0
SLC7A8	chr15:32800926-32860797	15.3434	14.4007	-0.091479	14.5382	15.8058	0.120607	21.2859	24.5546	0.206091	23.3844	33.2705	0.508699	18.4769	21.5388	0.22121	0.15005	0
CTSL1	chr17:6288015-6294174	154.17	175.758	0.189073	147.544	180.676	0.292267	271.384	267.161	-0.0226261	199.197	272.23	0.450626	190.987	220.649	0.208278	0.1502	0
CAR4	chr10:73229153-73237712	0.656361	0.620319	-0.0814792	1.06581	0.870127	-0.292653	1.11699	0.377509	-1.56503	1.65449	0.624889	-1.40471	1.1117	0.628791	-0.822112	0.1507	0
DDAH1	chr2:243932165-244071245	43.5418	36.2331	-0.265093	38.8243	36.6185	-0.0843878	58.7073	38.8073	-0.597211	30.6923	35.5669	0.212658	42.8912	36.6936	-0.225153	0.1507	0
ID2	chr6:42780931-42783325	38.227	53.4492	0.483578	33.4694	52.5569	0.651038	81.5048	90.4291	0.149903	78.2193	82.8822	0.0835385	56.7383	68.6437	0.274806	0.1512	0
DCAKD	chr10:92165554-92187843	22.8179	23.6036	0.0488359	24.1878	27.2117	0.169948	42.0548	43.5603	0.0507454	31.6837	49.7561	0.651135	29.8539	35.3009	0.241787	0.1514	0
ACSS1	chr3:141259015-141308871	7.01206	9.49633	0.437531	8.50961	9.87922	0.215304	9.77404	9.81756	0.00640942	6.82449	9.40182	0.462219	8.02575	9.62725	0.262488	0.1516	0
MROH7	chr5:127757622-127797548	1.09745	0.615648	-0.833984	0.980369	0.630801	-0.63614	1.62649	1.60133	-0.0224903	1.91192	1.26176	-0.599578	1.38733	1.00035	-0.471809	0.1522	0
EDN1	chr17:28303381-28310203	2.50889	2.95582	0.236512	2.2509	3.70744	0.719925	2.59373	3.39316	0.387603	2.37796	3.93875	0.728011	2.43552	3.47933	0.514579	0.15325	0
RAB11FIP1	chr16:69209991-69239791	2.32063	2.57644	0.150863	2.56674	2.64717	0.0445149	2.51967	3.66153	0.539212	3.51471	4.67379	0.411188	2.72231	3.33487	0.292799	0.15355	0
LOC497940	chr10:56740758-56744790	0.897415	0.372829	-1.26726	0.896362	0.599007	-0.581507	0.945555	0.799153	-0.242689	1.1689	0.635243	-0.879766	0.975267	0.59271	-0.718471	0.1546	0
LANCL3	chrX:25629604-25763349	12.6819	9.35045	-0.439665	11.7709	9.30836	-0.338629	6.6625	7.01801	0.0749989	5.98742	4.47298	-0.420697	9.46536	7.62646	-0.311644	0.15465	0
ZIC5	chr15:107590740-107598927	2.61869	2.82595	0.109891	1.76694	1.70057	-0.0552316	1.41698	2.0404	0.526034	1.29241	3.70812	1.52063	1.80269	2.54653	0.49838	0.1547	0
SELENBP1	chr2:189840449-189847640	3.33251	3.79615	0.187929	3.47385	4.08929	0.235315	5.62433	5.49397	-0.0338333	3.91804	8.63413	1.13992	4.05423	5.39655	0.412609	0.1548	0
RECK	chr5:60341367-60407988	18.8342	17.2493	-0.126819	21.3311	17.6153	-0.276131	28.6608	25.2308	-0.183894	28.5824	24.0109	-0.251433	24.1632	20.7579	-0.21915	0.1549	0
RBM33	chr4:2227293-2333538	29.5721	26.0941	-0.180514	32.8829	23.5473	-0.481775	26.3291	29.5337	0.165703	29.153	21.4748	-0.441001	29.6549	25.0827	-0.241578	0.15565	0
DHRS9	chr3:51521342-51543552	0.661145	0.714175	0.111311	1.30033	0.463591	-1.48795	0.992073	0.698862	-0.505439	0.869608	0.463078	-0.909112	0.958386	0.584076	-0.714449	0.1559	0
SLC43A3	chr3:68152749-68173185	2.04646	1.45708	-0.49005	2.21269	1.43497	-0.624774	2.60767	1.66965	-0.643216	1.79565	1.58811	-0.177198	2.16682	1.52825	-0.503694	0.15645	0
SEMA5B	chr11:66944880-67070820	7.84156	10.2974	0.393064	7.8655	9.08926	0.208625	7.53878	7.7543	0.0406658	5.15117	7.22982	0.489059	7.15415	8.64047	0.272329	0.15705	0
PPIL6	chr20:45452040-45479938	1.26616	0.569766	-1.15202	2.40062	0.508642	-2.23869	0.92362	1.28	0.470769	1.83674	1.58783	-0.210091	1.62389	0.957363	-0.762316	0.15735	0
HS3ST3A1	chr10:50734684-50821280	0.882033	2.19111	1.31276	1.05055	0.765357	-0.456937	0.359217	0.539506	0.586782	0.443084	1.33928	1.59581	0.701389	1.22476	0.804211	0.15755	0
GREM1	chr3:99597200-99608935	0.585123	1.21451	1.05356	0.930683	1.92768	1.05051	0.529839	0.512884	-0.0469221	0.383485	0.455745	0.249054	0.616713	1.05695	0.777233	0.15775	0
CFP	chrX:12584708-12590319	2.47963	2.05056	-0.274105	2.85772	2.07618	-0.460934	13.3086	7.52878	-0.821872	7.74325	8.09866	0.0647437	6.3772	4.75305	-0.42407	0.15855	0
PNN	chr6:79758959-79767942	42.2621	36.322	-0.218521	48.6429	38.4998	-0.337381	59.5668	55.7101	-0.0965698	64.227	56.9631	-0.173152	53.3349	46.1865	-0.207607	0.1588	0
ZFC3H1	chr7:54655953-54713868	17.6141	14.8112	-0.250046	20.1468	15.2363	-0.403042	24.4993	27.2965	0.155975	30.1423	23.6028	-0.352827	22.9233	19.8711	-0.206141	0.16015	0
CFB	chr20:4072123-4077801	4.45147	5.61047	0.333842	4.17868	7.26608	0.798131	24.1132	11.4698	-1.07198	9.45561	27.2285	1.52588	10.1899	12.4757	0.291982	0.1602	0
CSRP1	chr13:48750162-48775815	25.9016	29.2258	0.174202	28.8827	35.3904	0.293153	37.7853	35.9733	-0.0708999	23.5442	36.6232	0.637383	28.971	34.091	0.234781	0.1603	0
TCF7	chr10:37687248-37715689	0.624657	0.86761	0.473983	0.675352	1.11849	0.727837	1.17464	1.35926	0.210608	1.18801	2.14891	0.855056	0.902665	1.34717	0.577667	0.1606	0
CREB3L1	chr3:76361148-76401633	1.27956	1.45708	0.187428	0.971787	1.23369	0.344268	1.82958	2.47056	0.433328	2.03193	3.34903	0.72089	1.50973	2.07588	0.459436	0.16115	0
COL5A2	chr9:44374112-44525086	1.90753	1.28238	-0.572884	2.19753	1.68931	-0.379452	3.11888	3.29487	0.0791914	4.10352	2.95665	-0.472897	2.79583	2.24995	-0.313385	0.16165	0
TRIM14	chr5:63092631-63118519	0.955412	0.725335	-0.397477	0.781188	0.348549	-1.16431	0.758112	0.753338	-0.00911383	1.14388	0.688885	-0.731598	0.91047	0.622527	-0.548474	0.16205	0
COL13A1	chr20:29208653-29348751	0.485115	0.493272	0.0240562	1.01756	0.495239	-1.03891	1.71327	1.3482	-0.345714	2.42513	1.67688	-0.532281	1.37684	0.970335	-0.504805	0.16225	0
TMC7	chr1:176758816-176811225	2.18722	1.15834	-0.917046	1.34496	0.86814	-0.631558	1.0098	0.907593	-0.153947	0.851674	0.666894	-0.352845	1.37622	0.905255	-0.604309	0.1629	0
INSRR	chr2:179857188-179876572	2.06793	1.91506	-0.1108	2.02719	1.82626	-0.150589	4.0615	2.66952	-0.605434	3.58038	2.90388	-0.30213	2.88977	2.29564	-0.332055	0.1634	0
SLC7A5	chr19:52120727-52149332	61.2059	75.6674	0.306002	65.9634	70.3079	0.0920215	71.0642	79.4896	0.161643	66.7872	79.5472	0.25224	66.2452	75.8817	0.195936	0.16345	0
PCGF6	chr1:252357986-252377545	7.29146	5.64021	-0.370459	8.32127	5.38102	-0.628924	9.66466	8.96354	-0.108651	9.81699	8.73901	-0.16781	8.73827	7.06311	-0.307043	0.1644	0
HHATL	chr8:127146271-127153272	14.1673	15.6572	0.144258	15.9115	11.4525	-0.474404	7.69248	6.84447	-0.16851	14.562	4.96431	-1.55254	13.2369	9.94201	-0.412954	0.16455	0
METRN	chr10:15061785-15064117	61.764	83.5102	0.435187	65.3415	82.2471	0.331966	76.0705	75.9774	-0.00176662	56.0741	62.3628	0.153352	64.8486	76.2539	0.233735	0.16455	0
GINM1	chr1:2438836-2455297	2.58455	3.69715	0.516503	2.79672	3.16534	0.178624	6.50371	7.11329	0.129254	4.78801	8.29919	0.793545	4.09017	5.42747	0.40812	0.1649	0
PLA2G7	chr9:13057987-13100289	0.817895	0.647915	-0.336111	0.471772	0.578284	0.293688	2.14314	0.847673	-1.33815	1.16398	0.716284	-0.70046	1.12164	0.690827	-0.699213	0.16505	0
DIO2	chr6:114307757-114317563	4.60046	3.65582	-0.331585	3.03089	3.36487	0.150812	3.64914	1.43978	-1.34171	3.52532	2.24933	-0.648255	3.71855	2.72215	-0.44999	0.16555	0
NUDT22	chr1:209666128-209669604	6.75592	8.18081	0.276091	6.09891	10.6586	0.805388	12.3557	12.903	0.0625297	10.6256	14.6577	0.464107	8.8334	11.4372	0.372689	0.1658	0
PRDM8	chr14:12793684-12800310	47.0185	41.0709	-0.195113	46.3851	42.5347	-0.12502	54.9227	46.5282	-0.239296	54.4296	47.0424	-0.210429	50.5819	44.0353	-0.199958	0.1665	0
SEC16B	chr13:72771007-72830907	1.9099	2.04175	0.096308	1.84599	1.97713	0.0990126	2.70566	4.32416	0.676441	3.81995	4.82617	0.337323	2.5394	3.20715	0.336807	0.1668	0
IFITM2	chr1:201134350-201135537	3.81442	6.78137	0.830114	4.39365	6.70608	0.610049	20.2712	17.5373	-0.208999	10.7961	23.6591	1.13188	9.4967	13.222	0.477438	0.16695	0
ETS2	chr11:36014046-36030833	14.0183	11.0074	-0.348834	13.5805	13.8235	0.0255804	25.0881	17.685	-0.504477	14.6184	15.0551	0.0424668	16.6729	14.2334	-0.228231	0.16705	0
FGFR3	chr14:82682461-82697913	0.56852	0.699489	0.299089	1.00901	1.17069	0.214419	0.859399	0.638095	-0.429557	0.887045	2.2929	1.37009	0.830036	1.18127	0.509096	0.1672	0
TSPAN1	chr5:136442093-136447120	3.47834	2.0159	-0.786973	2.84733	2.29025	-0.314103	3.63353	5.45757	0.586887	7.40146	2.90348	-1.35003	4.29195	3.09657	-0.470961	0.16755	0
PTPN14	chr13:106004808-106156580	4.93997	5.95582	0.269796	4.87497	5.8464	0.262155	2.4964	4.4827	0.844518	3.71219	3.6068	-0.04155	4.06932	5.01704	0.302049	0.16775	0
CXCL9	chr14:17284084-17288996	0.283032	2.44335	3.10982	0.308521	1.09144	1.8228	0.704427	0.592837	-0.248813	1.27743	1.7555	0.458634	0.626221	1.48776	1.2484	0.16785	0
LAMA1	chr9:106855254-106981152	0.678397	0.888206	0.388764	0.680824	0.654084	-0.0578057	0.939723	1.35253	0.525352	1.17025	1.57444	0.428022	0.859135	1.09417	0.348875	0.16795	0
SHISA2	chr15:38739736-38746136	4.63355	3.3807	-0.454797	4.12621	4.81166	0.22172	3.55062	4.59953	0.373413	3.16031	9.82119	1.63583	3.90599	5.54539	0.505603	0.16805	0
SLC20A2	chr16:73948918-74187292	9.18947	10.317	0.166965	9.38703	10.6668	0.184387	20.2303	20.2981	0.00482865	13.72	22.9478	0.742078	12.9303	15.6829	0.278442	0.1681	0
STEAP4	chr4:22688596-22711432	0.468776	0.221571	-1.08113	0.284936	0.508468	0.835518	2.16733	0.76103	-1.50989	0.660288	0.849014	0.362693	0.865072	0.569899	-0.602115	0.16835	0
TAF1C	chr19:49842370-49848891	4.707	4.80099	0.0285251	6.79228	5.10203	-0.412825	8.85511	6.55872	-0.433096	8.66713	7.3961	-0.228788	7.18369	5.88878	-0.286756	0.16835	0
CLEC7A	chr4:166723514-166734589	2.54729	2.71081	0.0897614	2.87668	4.21547	0.551289	4.78244	4.82691	0.0133526	1.57361	3.79362	1.2695	2.9317	3.84904	0.39276	0.1684	0
CHCHD10	chr20:13122225-13126461	68.238	79.3959	0.21849	73.2444	83.8505	0.195101	222.583	252.975	0.184647	216.225	272.624	0.33438	141.163	166.323	0.236624	0.16845	0
TF	chr8:108217773-108244487	22.586	27.1595	0.266031	21.0842	26.7414	0.342915	107.464	42.244	-1.34704	26.8826	53.1595	0.983654	43.1553	36.6142	-0.237135	0.1686	0
CGNL1	chr8:76088864-76243068	9.9902	10.0435	0.00767462	9.1062	10.0406	0.140923	8.36588	9.60238	0.198876	8.1218	12.308	0.599729	8.95493	10.4469	0.22232	0.1705	0
ARR3	chrX:88602646-88614721	57.8999	46.2191	-0.325073	60.3086	48.4181	-0.316816	57.6204	53.6607	-0.102712	65.9341	60.8666	-0.115374	60.5219	51.8646	-0.222707	0.1706	0
COL4A3	chr9:81910655-82036998	2.83614	3.17633	0.163432	3.15684	2.80118	-0.172443	4.00561	3.56055	-0.16992	2.76303	6.35248	1.20107	3.18395	3.90526	0.2946	0.17065	0
CLEC12A	chr4_random:1814268-1824428	2.102	0.75647	-1.47441	1.52188	1.68879	0.150134	5.71399	2.5699	-1.15279	2.37369	2.41744	0.026349	2.86518	1.81375	-0.65965	0.17095	0
TMEM72	chr4:153036954-153062248	3.33845	3.60678	0.111533	3.34949	3.4487	0.0421095	3.11056	3.6757	0.240842	2.50753	5.05013	1.01005	3.09779	3.91139	0.336443	0.1722	0
RHOC	chr2:200047968-200075536	35.4346	37.8221	0.0940737	33.055	41.8672	0.340953	69.5052	76.7916	0.143828	46.9363	65.6132	0.483284	45.6164	54.4326	0.254919	0.1725	0
GDA	chr1:224579793-224655298	1.64984	1.33658	-0.303784	1.19014	1.65696	0.477401	2.21307	1.75104	-0.337837	3.55083	1.00175	-1.82563	2.11778	1.436	-0.560497	0.17255	0
ZIC4	chr8:96322317-96342765	1.06722	1.08394	0.0224266	0.835871	0.828965	-0.0119691	1.35256	1.37498	0.0237224	1.11429	3.53201	1.66436	1.08691	1.65689	0.608239	0.17265	0
DAP	chr2:83281936-83335449	10.4713	12.4489	0.249578	11.2608	12.4853	0.148926	23.5444	23.417	-0.00782456	18.3838	28.7578	0.645516	15.6536	18.8213	0.265873	0.17295	0
CRIP2	chr6:138147461-138152407	100.583	88.5838	-0.183275	100.223	97.5987	-0.0382734	251.164	167.169	-0.587321	153.517	172.128	0.165086	148.628	128.729	-0.207365	0.1739	0
RGD1306730	chr1:187949937-187995550	20.6149	16.7534	-0.299235	19.8244	17.5037	-0.179617	20.5	19.0553	-0.105433	22.7684	18.4896	-0.300323	20.942	17.8565	-0.229952	0.17465	0
CHDH	chr16:5349303-5380798	1.04668	0.876375	-0.256197	1.49845	1.28668	-0.21982	2.85299	1.13459	-1.3303	0.386307	0.821129	1.08786	1.434	1.0296	-0.477961	0.17535	0
PABPN1	chr15:32994492-32999104	65.0686	60.2067	-0.112038	85.7767	64.7643	-0.405385	164.637	147.708	-0.156535	182.363	162.732	-0.164311	121.972	105.788	-0.205382	0.17765	0
FAM161A	chr14:103692651-103705775	20.9445	15.4437	-0.439558	20.4322	16.579	-0.301494	15.6479	17.6799	0.17614	24.4375	19.8244	-0.301815	20.4509	17.2563	-0.245044	0.17775	0
GSN	chr3:14345107-14386325	8.86234	7.75061	-0.193379	9.38412	10.1222	0.109233	13.0455	12.6702	-0.0421143	21.5548	13.1539	-0.712515	13.0269	10.7743	-0.273905	0.1785	0
SLC17A4	chr17:48325941-48337147	1.75606	1.93748	0.141834	2.82696	1.80118	-0.650312	5.11695	4.83302	-0.0823596	5.70475	3.35068	-0.767709	3.77127	2.90595	-0.376041	0.1792	0
B3GALT5	chr11:36580435-36641598	13.0749	15.2104	0.218255	11.6887	13.3991	0.197025	9.71215	11.4917	0.242735	8.86398	10.5706	0.254036	10.9488	12.7391	0.218492	0.17935	0
RGD1359529	chr5:153698945-153702685	198.417	178.617	-0.151665	239.705	196.117	-0.289541	367.322	364.071	-0.0128243	437.812	352.348	-0.313311	306.415	266.94	-0.198973	0.1797	0
NOTCH3	chr7:12687619-12740015	2.81588	3.64975	0.374211	3.02122	3.71644	0.298788	3.85127	4.66974	0.27801	4.20097	4.59024	0.127847	3.44949	4.11786	0.25551	0.18005	0
PDIA5	chr11:67117644-67204482	0.945755	1.5024	0.667734	1.14324	1.9846	0.795727	3.02901	2.8093	-0.108636	1.80397	3.48009	0.947953	1.69275	2.39538	0.500886	0.18015	0
CPT1B	chr7:127737128-127750150	2.83716	2.50994	-0.176795	4.13311	2.20196	-0.908442	7.48043	5.45217	-0.456291	7.96942	5.36683	-0.570406	5.49687	3.78156	-0.53963	0.1807	0
GPX8	chr2:44424009-44427603	8.86939	11.9179	0.426229	10.3906	12.0314	0.211526	18.0058	16.9094	-0.0906384	14.7244	24.3963	0.728456	12.8278	16.0149	0.320143	0.1808	0
SLC16A11	chr10:57051552-57055278	2.3162	1.70028	-0.445991	2.62437	1.54194	-0.767227	4.58682	3.81394	-0.266213	4.42481	3.28021	-0.431826	3.43761	2.51974	-0.448128	0.18085	0
LOC100194648	chr4:4988537-4989198	3.42203	6.23347	0.865182	3.95393	5.56729	0.493687	3.429	5.70188	0.733647	3.83922	4.41997	0.203225	3.67141	5.4935	0.581393	0.18115	0
APOBEC2	chr9:7947499-7961013	0.440073	0.665434	0.596553	0.667095	0.424288	-0.652848	0.597466	0.2019	-1.56521	1.84243	0.668274	-1.4631	0.872146	0.492672	-0.823943	0.1818	0
SAFB2	chrUn:25194132-25215328	30.2478	26.04	-0.216105	31.3197	27.2969	-0.198334	31.4471	29.0612	-0.113834	31.9579	27.0262	-0.241815	31.2907	27.2463	-0.199674	0.1818	0
SENP8	chr8:63564235-63577603	7.64823	4.93113	-0.633207	9.52582	5.94309	-0.68063	5.51232	6.20574	0.170945	5.93201	4.27555	-0.47241	7.25155	5.32974	-0.444225	0.1819	0
ALDH2	chr12:36081777-36116444	8.20714	8.75354	0.092986	8.53839	10.3669	0.279945	16.1738	15.3626	-0.0742323	12.4381	20.8204	0.74323	11.1892	13.5343	0.274521	0.1828	0
PCDHB12	chr18:30243894-30246913	4.19747	3.3039	-0.345348	3.88786	3.55558	-0.128892	4.51798	2.90174	-0.63876	3.94857	3.35664	-0.234315	4.1416	3.28047	-0.336284	0.18335	0
RNF112	chr10:47599957-47605503	7.79407	7.31769	-0.0909896	10.2944	8.40929	-0.291798	11.0425	8.41644	-0.39179	9.02578	7.88987	-0.194049	9.5262	7.97849	-0.255786	0.1838	0
PHLPP1	chr13:12343187-12565692	33.9612	37.7421	0.15229	28.7594	36.4079	0.340215	30.7009	33.4004	0.121588	26.4457	29.1732	0.141612	30.1154	34.2747	0.186643	0.18395	0
PGAM2	chr14:86466029-86468259	5.75145	4.27861	-0.426784	5.43082	6.7773	0.319541	4.85561	3.73919	-0.376927	10.3279	3.99324	-1.37091	6.56175	4.73223	-0.471561	0.184	0
OLR1	chr4:166747227-166769340	2.5237	2.49724	-0.0152054	2.0895	2.45598	0.23314	2.88836	3.53748	0.292469	1.41549	3.07583	1.11968	2.23651	2.85952	0.354526	0.1841	0
RIN2	chr3:134307537-134503915	13.8295	12.2727	-0.172294	13.3821	13.2797	-0.0110778	20.7787	18.8513	-0.140442	13.1739	27.402	1.0566	15.2163	17.5971	0.209723	0.18465	0
MCTP1	chr2:3652721-4356575	3.79818	3.84582	0.0179827	4.15459	2.86087	-0.538251	4.12441	3.23054	-0.352411	3.78336	2.73735	-0.466887	3.97401	3.1736	-0.324476	0.18525	0
SRSF5	chr6:104728263-104732992	165.435	148.956	-0.151379	191.983	159.909	-0.263723	263.169	241.962	-0.12121	288.185	249.771	-0.206392	224.986	196.893	-0.192428	0.1863	0
IFT88	chr15:36467951-36560959	10.312	9.68855	-0.0899749	11.9892	9.08338	-0.400437	15.0005	13.3777	-0.165184	16.7389	13.9074	-0.267352	13.4091	11.3592	-0.23936	0.18705	0
PLEKHG3	chr6:99132367-99174857	1.00043	0.623582	-0.681969	0.872857	1.05732	0.276594	1.14675	1.17195	0.0313646	0.973087	2.62088	1.42941	0.996948	1.33308	0.419174	0.1877	0
MFAP2	chr5:159868932-159874481	3.84285	5.64888	0.555788	7.98023	7.30707	-0.127137	13.5771	12.3756	-0.133683	11.4066	22.5552	0.9836	9.02622	11.612	0.363425	0.1897	0
TNFRSF25	chr5:169344694-169348961	0.905531	0.652108	-0.473654	1.43667	1.22228	-0.23315	3.81921	1.45048	-1.39674	2.82539	2.92983	0.052366	2.18803	1.5217	-0.523948	0.19	0
ENPP1	chr1:21223677-21287411	1.67355	1.55489	-0.106105	1.08521	1.2263	0.176347	1.91157	2.07698	0.119726	1.47594	3.58333	1.27966	1.53114	2.06288	0.430054	0.19045	0
GALNT14	chr6:21776048-22007581	20.7108	17.5144	-0.241841	19.4614	15.8243	-0.298478	14.8007	12.1005	-0.290605	12.8774	12.3749	-0.0574278	17.1785	14.5557	-0.239019	0.1907	0
PRKCD	chr16:5954216-5975743	8.37296	9.1555	0.128901	8.49961	10.0011	0.234695	9.60719	11.1276	0.211958	8.11673	11.2821	0.475063	8.65429	10.3163	0.253434	0.191	0
FCGR3A	chr13:86867640-86877665	3.61337	4.19536	0.215448	4.10839	3.91924	-0.0680014	20.5818	7.65856	-1.42622	5.89198	10.2074	0.79279	8.27134	6.33358	-0.385099	0.19125	0
SUV420H2	chr1:67815977-67823611	17.244	11.5036	-0.584007	20.9682	15.6716	-0.420057	29.9515	26.9709	-0.151224	31.6905	32.178	0.0220239	24.6878	21.0419	-0.230534	0.19125	0
CBS	chr20:10047477-10075520	0.327781	0.393456	0.26347	0.511741	0.912976	0.835162	0.911888	0.771262	-0.241637	0.314345	1.1082	1.8178	0.51069	0.785208	0.620627	0.1915	0
KLF10	chr7:73821189-73826866	5.69188	5.71714	0.00638765	5.68541	7.35668	0.371789	7.31656	8.37304	0.194587	5.30237	7.72885	0.543617	5.99148	7.22788	0.27066	0.19295	0
CARD10	chr7:116737927-116766959	4.6009	5.18812	0.173294	3.79084	5.71132	0.591309	2.66969	3.12437	0.226895	2.74266	3.13136	0.191212	3.50285	4.34789	0.311786	0.19315	0
FGF22	chr7:11463298-11465189	4.37401	3.53859	-0.305782	4.78131	1.75698	-1.44431	3.28398	2.45336	-0.420687	3.94229	2.17476	-0.858179	4.1334	2.48779	-0.732463	0.19315	0
CCL19	chr5:59221737-59223682	0.728595	1.96649	1.43243	0.791458	2.98536	1.91532	2.48777	1.99774	-0.316487	2.3142	3.03248	0.389983	1.53708	2.48712	0.694287	0.1935	0
RCSD1	chr13:81370794-81387658	0.952241	1.68711	0.825152	0.782261	1.65259	1.079	2.06469	1.76114	-0.229413	1.08381	1.60334	0.564966	1.20172	1.67166	0.476175	0.1938	0
TAC3	chr7:67717067-67723674	10.3807	15.0719	0.537947	15.1631	16.7376	0.142525	11.5402	15.2027	0.397655	13.2402	18.4253	0.476766	12.619	16.2913	0.368504	0.19425	0
UNC13D	chr10:106170474-106185215	1.97231	1.58632	-0.314201	2.29644	2.1129	-0.120169	3.37647	2.21612	-0.60748	3.24356	2.70535	-0.261762	2.69447	2.13089	-0.338545	0.1944	0
CHI3L1	chr13:47139657-47147591	77.974	72.8881	-0.0973098	78.7823	109.775	0.4786	449.455	185.528	-1.27654	83.8189	216.849	1.37135	166.804	142.542	-0.226763	0.19475	0
ATHL1	chr1:201120787-201127372	6.06279	4.40182	-0.461882	6.12941	5.7826	-0.084028	9.28908	5.40466	-0.781331	5.5268	6.6767	0.272691	6.72287	5.52274	-0.283694	0.1949	0
CYTIP	chr3:39893886-39921114	0.584803	0.4422	-0.403252	0.948846	0.620217	-0.613401	1.36851	0.544421	-1.32982	1.0462	0.901907	-0.214109	0.975746	0.619732	-0.654861	0.1951	0
FUK	chr19:40803643-40823614	6.26328	4.6861	-0.418532	7.07518	6.50518	-0.121177	4.71569	4.60706	-0.0336234	5.66898	3.42211	-0.728201	5.98817	4.83838	-0.307591	0.1954	0
ZFP347	chr7:8930165-8940590	7.60518	6.53332	-0.219167	7.89446	6.93914	-0.186083	10.5005	9.05726	-0.213306	9.82281	8.22647	-0.255862	8.90651	7.6121	-0.226565	0.1957	0
SUCLG2	chr4:129995855-130276182	14.2058	14.1133	-0.00942604	13.7577	15.7755	0.197439	19.0309	19.7723	0.0551364	14.9821	23.8736	0.672172	15.437	18.1306	0.232033	0.19585	0
OPHN1	chrX:86519899-86801421	5.33525	8.01202	0.586612	6.05794	9.61632	0.666657	5.60819	5.80159	0.0489118	2.8686	5.24328	0.870122	5.01424	7.24791	0.531534	0.19615	0
ALDH4A1	chr5:158437689-158453827	13.288	16.2851	0.293432	13.9014	18.0356	0.375614	18.2634	17.1697	-0.0890977	13.137	16.7279	0.348625	14.6109	17.0172	0.21995	0.1962	0
RNF24	chr3:119006868-119063034	4.27685	4.24955	-0.0092374	20.7886	6.72239	-1.62874	9.40491	6.95024	-0.436351	3.58288	3.44451	-0.0568213	9.67236	5.33286	-0.858958	0.1964	0
CTSK	chr2:190394853-190405668	0.926976	0.308085	-1.5892	1.23461	0.756236	-0.707152	3.02455	2.03391	-0.572467	2.29101	2.07539	-0.142603	1.8269	1.24359	-0.554881	0.1969	0
PGM5	chr1:228107410-228300939	4.81138	5.31424	0.143412	4.73581	5.68131	0.262614	2.31173	3.40453	0.558481	2.21635	4.17847	0.914786	3.59854	4.6848	0.380575	0.1971	0
OPN4	chr16:10249759-10258923	5.50986	5.77329	0.0673788	4.83674	6.59048	0.446346	5.05901	6.48234	0.357662	5.91788	7.76886	0.392621	5.33719	6.60847	0.308237	0.1972	0
LUC7L3	chr10:82930043-82966064	60.1006	58.6347	-0.035623	78.0396	59.864	-0.382517	111.614	105.378	-0.0829453	119.795	102.674	-0.222491	91.2713	80.0859	-0.188613	0.19745	0
RMDN1	chr5:34210398-34233936	7.48548	9.7284	0.378108	6.83169	8.11921	0.249096	10.8274	12.7939	0.240774	9.11689	11.4993	0.334934	8.50289	10.4147	0.29259	0.1985	0
ZUFSP	chr20:30096105-30126201	22.4609	18.3007	-0.295516	23.3086	20.2333	-0.204129	37.0368	33.5165	-0.14409	39.8214	34.5823	-0.203513	30.2915	26.1449	-0.212385	0.19895	0
RGD1562608	chr18:17205201-17333938	11.2613	3.83156	-1.55537	5.87723	6.28513	0.0968056	9.35484	8.28925	-0.174472	8.76768	4.59148	-0.933237	8.82803	5.68859	-0.63402	0.19955	0
CLEC10A	chr10:56998777-57002953	0.537373	0.290228	-0.888736	0.290717	0.45334	0.640978	1.84175	0.778328	-1.24263	0.797045	0.567168	-0.490885	0.841174	0.511584	-0.717433	0.19965	0
SFRP1	chr16:73028104-73067315	3.49444	4.54614	0.379582	3.47774	5.53039	0.669233	2.27565	2.24868	-0.0171997	1.86913	4.84223	1.37331	2.82529	4.32612	0.614675	0.19975	0
TBKBP1	chr10:85855903-85869707	14.0769	11.9667	-0.234306	18.1277	14.2745	-0.344755	23.1587	22.0352	-0.0717424	22.1351	19.2597	-0.20075	19.2267	16.6114	-0.210936	0.2006	0
ASXL1	chr3:143697628-143767522	11.4049	9.44689	-0.271738	11.0298	9.88531	-0.15805	12.8707	11.3575	-0.180444	13.7798	12.1245	-0.18463	12.2427	10.6148	-0.205846	0.201	0
PSAT1	chr1:219268419-219290273	52.429	57.5323	0.134005	57.1839	60.6149	0.0840628	41.0434	57.1889	0.478583	50.4023	56.1912	0.156855	50.6556	57.8101	0.190602	0.2012	0
GBP2	chr2:240522999-240541078	3.83083	4.65572	0.281345	3.48269	4.82672	0.470843	6.75909	6.70248	-0.0121346	5.12575	7.88372	0.621113	4.74298	5.92578	0.321211	0.20125	0
RPLP1	chr8:66046218-66047553	466.877	596.573	0.353655	601.711	633.024	0.0731898	643.285	706.109	0.134432	537.077	634.92	0.241446	561.584	639.351	0.187105	0.20135	0
CASC1	chr4:182768860-182859566	5.67405	4.59733	-0.303583	5.47016	4.62047	-0.243544	7.43254	5.61765	-0.403889	7.43674	6.27506	-0.245041	6.46603	5.22478	-0.307511	0.20195	0
ZFP692	chr10:43945194-43952710	18.5398	15.3197	-0.275234	23.3687	17.3587	-0.428918	28.3645	27.5823	-0.0403431	33.7361	29.2897	-0.203896	25.781	21.9658	-0.231054	0.20215	0
CAR14	chr2:190683544-190690434	122.692	125.72	0.0351785	113.71	124.399	0.12961	60.3811	106.553	0.819407	102.549	107.121	0.0629179	101.214	116.224	0.199501	0.2022	0
MXRA7	chr10:106904479-106933413	5.25577	7.00441	0.414361	10.5426	3.55783	-1.56716	14.8656	12.3411	-0.268516	16.5327	14.593	-0.180051	11.6015	9.11047	-0.348713	0.20235	0
ANO6	chr7:134434724-134624126	5.32732	5.90892	0.149483	4.65979	5.92406	0.346322	10.5907	9.44722	-0.164841	5.41037	9.38044	0.79393	6.41708	7.54106	0.23285	0.2033	0
RHPN2	chr1:87853619-87923706	8.84075	6.93531	-0.350209	8.09253	7.89949	-0.0348315	9.81003	6.0536	-0.696466	6.78377	7.17096	0.0800787	8.40126	7.02127	-0.258874	0.2034	0
NGB	chr6:111231186-111236455	12.4634	14.0591	0.173808	12.8236	16.6423	0.376051	16.8793	17.9985	0.0926221	16.0047	20.4909	0.35649	14.4668	17.1354	0.244238	0.20375	0
QPRT	chr1:186358522-186374681	0.622766	1.34526	1.11112	0.770665	1.45818	0.919994	1.81098	1.35993	-0.413242	1.04235	2.36309	1.18084	1.04165	1.614	0.631771	0.20395	0
DLK1	chr6:134022015-134029075	1.77122	0.956584	-0.88878	1.5974	1.13847	-0.488637	1.31121	0.852366	-0.621352	1.05924	0.846788	-0.32296	1.4521	0.951975	-0.609143	0.2054	0
TBX5	chr12:37956657-38004255	2.28908	0.868775	-1.39771	1.00391	1.19297	0.248926	2.04065	0.862483	-1.24246	0.631192	1.14292	0.856577	1.50239	1.0148	-0.566069	0.20555	0
ARXES1	chrX:123288595-123290137	2.69138	1.40944	-0.933225	5.65041	6.13329	0.118305	2.49884	1.43885	-0.796338	3.8386	1.42906	-1.42552	3.70592	2.65961	-0.478616	0.2066	0
LRRN2	chr13:45777590-45838309	17.0938	17.6701	0.0478417	17.525	18.6678	0.0911374	22.584	20.7913	-0.119319	15.8031	27.6565	0.807415	18.2266	20.9637	0.201845	0.2079	0
DDT	chr20:13591784-13594253	37.8238	53.2263	0.492843	53.4146	54.4669	0.0281457	63.7615	77.4007	0.27966	64.6865	77.8415	0.267075	54.5034	64.8561	0.250896	0.20835	0
SSC5D	chr1:67630583-67648373	11.8967	9.78702	-0.281623	14.972	11.7514	-0.349425	30.9812	22.604	-0.454819	19.6448	23.8	0.276815	19.054	16.5665	-0.201828	0.20935	0
SDC2	chr7:68290443-68406157	22.1379	22.2332	0.00619406	21.4548	22.2732	0.0540074	22.118	22.5455	0.0276214	18.7179	32.0295	0.774978	21.1904	24.5623	0.213033	0.2096	0
LRP10	chr15:32527393-32533554	13.6911	14.221	0.0547881	13.4534	16.7923	0.31983	25.1329	25.9779	0.0477078	20.4034	27.547	0.433087	17.942	20.7403	0.209093	0.20975	0
4933427D14RIK	chr10:59051323-59095882	5.87924	5.57228	-0.0773623	6.80985	4.97273	-0.453584	5.33811	4.81421	-0.14903	6.43342	5.39258	-0.254608	6.14375	5.18181	-0.245663	0.2099	0
PRTN3	chr7:11334721-11338559	0.491976	1.23943	1.33302	0.17803	0.632422	1.82877	0.860207	0.604639	-0.508609	0.131531	0.838477	2.67237	0.410758	0.834285	1.02225	0.2104	0
PLD5	chr13:91712762-92058036	5.25807	4.69439	-0.163595	4.68863	4.51022	-0.0559678	7.03946	8.00203	0.184901	3.37424	8.86706	1.3939	5.08868	6.3876	0.327982	0.2132	0
ASS1	chr3:10578692-10622332	19.4109	18.33	-0.0826556	19.3753	21.9876	0.182466	36.715	36.947	0.00908817	26.5978	44.0498	0.727827	25.2153	29.6382	0.233161	0.21325	0
PROS1	chrUn:8218375-8300049	18.4934	15.156	-0.287122	16.6472	16.2361	-0.0360706	27.3733	20.562	-0.412792	20.0164	20.2013	0.0132608	20.4944	17.8522	-0.199129	0.21345	0
TMEM145	chr1:80580822-80590502	19.5619	14.2513	-0.456952	20.8803	20.3662	-0.0359641	54.3573	45.7607	-0.248365	55.7461	51.0463	-0.127066	36.7348	31.8298	-0.206766	0.2136	0
UBASH3B	chr8:43992237-44135869	20.7153	19.6773	-0.0741643	22.3861	18.3774	-0.284669	14.975	11.5988	-0.368575	10.4301	9.15331	-0.188382	17.4077	14.9292	-0.221587	0.21385	0
GSTA3	chr9:20051500-20068146	596.295	689.117	0.208722	622.237	748.31	0.266171	821.48	783.854	-0.0676403	589.575	778.524	0.401068	655.705	746.173	0.186463	0.2145	0
EGFL7	chr3:4760573-4769908	1.55341	1.95775	0.333758	1.39991	2.54612	0.862963	2.68139	3.0631	0.19201	2.08145	2.88509	0.471027	1.90682	2.58394	0.438403	0.21475	0
CCR10	chr10:90193775-90196213	4.89567	3.00481	-0.704235	4.33226	3.64738	-0.248261	3.71916	3.63048	-0.0348186	4.50991	3.3512	-0.428423	4.39119	3.39421	-0.371536	0.2153	0
WNK3	chrX:40531909-40640668	4.36998	3.91086	-0.160141	3.73364	2.8223	-0.403711	3.5836	3.65187	0.0272247	3.86122	2.73153	-0.499348	3.90712	3.27796	-0.253307	0.2153	0
SLCO1C1	chr4:178959892-179006727	7.90238	10.129	0.358126	10.0965	8.71676	-0.211997	11.4974	13.9135	0.275177	12.7098	17.4005	0.453191	10.4877	12.325	0.232882	0.2154	0
LGALS3BP	chr10:108388184-108397520	19.8492	24.6004	0.309603	16.3657	27.129	0.729165	41.0621	27.0019	-0.604746	24.257	37.5337	0.629785	24.9994	28.803	0.204329	0.2157	0
HSD17B1	chr10:90094248-90096451	0.49613	0.689012	0.47381	0.306787	0.546672	0.833438	0.581983	1.25696	1.11089	0.839176	1.19456	0.509436	0.54931	0.901423	0.714583	0.21615	0
EBF4	chr3:117910215-117977998	8.94237	8.27019	-0.112737	10.8268	7.43442	-0.542315	9.6363	7.62028	-0.338635	9.92964	8.56187	-0.213815	9.85846	7.94718	-0.310919	0.21625	0
MAL2	chr7:90945458-90978439	7.61591	6.85062	-0.152782	6.74699	6.55504	-0.0416401	8.90459	10.505	0.238456	11.2251	17.7339	0.659783	8.56738	10.1652	0.246706	0.217	0
PER3	chr5:168150556-168187825	57.2173	51.0488	-0.164574	58.5003	50.3691	-0.215906	52.1993	54.168	0.0534095	56.1634	41.7629	-0.427408	56.2641	49.2986	-0.190666	0.2175	0
DPM3	chr2:181439450-181439966	20.7529	12.8715	-0.68914	29.8315	17.5812	-0.762801	10.7841	13.5493	0.329312	14.3078	11.0577	-0.371751	19.3223	13.812	-0.484346	0.2177	0
ENO3	chr10:57536944-57542319	3.54173	3.6708	0.0516402	4.39377	2.98807	-0.556246	5.19361	5.33926	0.0399016	10.3749	6.26362	-0.728035	5.79089	4.48109	-0.369937	0.21845	0
CNIH2	chr1:207715691-207717584	22.7386	21.4423	-0.084689	22.9573	19.4632	-0.238203	45.9681	36.6557	-0.326594	48.0307	40.948	-0.230162	34.3226	29.0065	-0.242784	0.2186	0
CLASRP	chr1_random:1469805-1494146	12.1175	11.9521	-0.0198269	16.3282	14.6885	-0.152685	36.4818	32.1456	-0.182554	39.6871	31.832	-0.318194	25.5371	22.0316	-0.213023	0.2191	0
ANXA6	chr10:40383974-40439705	26.4411	27.7367	0.0690117	25.4899	27.0714	0.0868475	32.541	33.2529	0.0312207	27.9587	41.5108	0.570188	28.0442	32.0179	0.191178	0.21965	0
GADD45G	chr17:19230893-19232662	35.0723	33.6228	-0.060892	45.2635	50.6737	0.16289	41.4146	48.956	0.241348	31.078	46.6687	0.586563	38.3748	44.6734	0.219257	0.21965	0
LOC655234	chr11:5434536-5436477	23.4184	24.4468	0.062005	37.9319	28.2994	-0.422643	15.6201	13.5231	-0.207979	10.3693	8.04233	-0.366637	22.3604	18.9966	-0.235207	0.21985	0
CRADD	chr7:32504278-32517581	2.79579	2.68331	-0.0592427	3.87704	2.2462	-0.787469	6.33881	4.37008	-0.536553	5.00714	3.41831	-0.550703	4.44468	3.12901	-0.506376	0.22	0
ACADSB	chr1:190987656-191026275	35.7003	36.7124	0.0403332	40.8304	33.595	-0.281394	37.7188	30.6623	-0.298819	37.5398	30.22	-0.312915	38.0483	32.8662	-0.211228	0.22005	0
SREBF1	chr10:46365926-46483700	37.8011	41.8249	0.145933	37.0561	44.3724	0.259953	44.364	52.5265	0.243657	35.2326	46.4419	0.398517	38.6198	45.9814	0.251709	0.2204	0
KDM4D	chr8:11222555-11247715	0.358407	0.817402	1.18945	0.688765	0.844698	0.294424	0.829565	0.530082	-0.646138	0.343019	1.14752	1.74215	0.553038	0.832875	0.590722	0.22045	0
MPLKIP	chr17:55268586-55271153	12.6091	9.75881	-0.369693	13.5013	9.77572	-0.465828	11.0157	12.4648	0.178306	12.5208	9.58993	-0.384737	12.4798	10.3333	-0.272291	0.22065	0
NEK2	chr13:107895670-107908904	0.460412	0.870473	0.918872	0.715167	0.998794	0.481908	0.381647	0.883584	1.21113	0.873265	0.676298	-0.36876	0.608608	0.859633	0.498209	0.22065	0
CTF1	chr1:187001444-187006655	1.45	0.704796	-1.04077	0.863046	1.5378	0.833356	1.53674	2.62534	0.772631	1.34764	2.99674	1.15296	1.29469	1.90921	0.560369	0.2209	0
SLC16A13	chr10:57056390-57060041	5.06406	4.54972	-0.154518	5.63873	4.10903	-0.456573	7.137	5.74156	-0.313874	6.9108	5.59216	-0.305446	6.15347	4.94637	-0.315029	0.22145	0
SLC25A34	chr5:160519855-160523712	2.19649	4.82966	1.13672	2.54732	2.64714	0.055451	1.65816	2.29003	0.465782	1.71733	1.43664	-0.257466	2.05379	2.85399	0.474694	0.2216	0
CBX2	chrUn:51843828-51852658	1.55712	1.4274	-0.125487	1.96266	1.27384	-0.623628	2.09672	1.86236	-0.171004	2.4419	1.79783	-0.441744	2.00504	1.57228	-0.350777	0.2219	0
SH3PXD2B	chr10:17184222-17269779	1.61714	1.78984	0.146386	1.12173	1.41974	0.3399	2.06198	2.29527	0.154633	1.30035	2.07739	0.67588	1.51913	1.87395	0.302842	0.22325	0
GNG7	chr7:10203111-10271719	32.0654	33.9335	0.0816955	30.6366	30.9159	0.0130942	64.8922	24.233	-1.42107	47.2154	23.2309	-1.02321	43.0727	28.2783	-0.607076	0.2236	0
FAM84A	chr6:37782014-37786488	9.2935	8.10632	-0.197174	9.86401	10.0142	0.0218029	9.47684	9.24612	-0.0355576	8.73834	16.9844	0.958778	9.37647	10.9385	0.222294	0.22475	0
TRANK1	chr8:115701441-115782385	8.8895	7.9192	-0.166747	8.75377	7.97435	-0.134537	9.5324	9.51903	-0.00202538	9.80074	7.16664	-0.451595	9.2427	8.11241	-0.188184	0.2251	0
TFRC	chr11:69976257-69998098	41.3692	38.6056	-0.0997498	38.9702	31.2955	-0.316414	35.3268	32.1547	-0.135732	34.8771	32.2219	-0.114241	37.8717	33.5842	-0.173337	0.2261	0
ZNRF4	chrUn:25255202-25256442	5.15367	2.88228	-0.838388	3.73877	3.68434	-0.0211558	2.35183	1.63022	-0.52872	1.93379	1.35284	-0.515444	3.36896	2.4345	-0.468679	0.2266	0
RHOQ	chr6:10414041-10474852	8.18298	10.1546	0.311431	8.61388	10.1788	0.240838	12.3637	12.7305	0.0421835	9.75328	12.8997	0.403378	9.66985	11.3834	0.235365	0.22665	0
WBSCR22	chr12:22724687-22735895	3.50348	3.87212	0.144337	2.4696	7.61974	1.62546	2.1636	5.49994	1.34598	9.03959	5.21422	-0.793806	4.24523	5.54394	0.385069	0.2277	0
RGD1309676	chr16:17425526-17445308	17.1722	21.1228	0.298728	18.4304	19.5974	0.0885736	27.396	26.3301	-0.0572543	23.8404	35.2933	0.56599	21.5297	25.2145	0.227925	0.2278	0
ITGBL1	chr15:108785508-109051028	0.812188	0.7458	-0.123026	0.92188	0.66561	-0.469902	0.845631	0.921754	0.124354	2.13274	1.04323	-1.03165	1.16568	0.833884	-0.483252	0.22965	0
C2CD4B	chr8:72110727-72111977	3.10214	1.86142	-0.736858	2.05253	1.41236	-0.539297	1.22945	0.79139	-0.635547	1.08346	1.04784	-0.0482196	1.91287	1.29768	-0.559803	0.23	0
RGD1563986	chr4:67962304-67988706	39.8409	35.5531	-0.164277	40.5393	33.5298	-0.273878	16.4316	18.5717	0.176636	21.2426	13.8373	-0.618397	30.2007	25.868	-0.223413	0.23075	0
TACSTD2	chr4:97803150-97804851	2.05989	1.298	-0.666278	1.48535	2.0412	0.458612	1.53683	2.84274	0.887324	5.85372	1.89855	-1.62446	2.69528	1.99258	-0.435801	0.23075	0
CPLX4	chr18:62536596-62552045	302.81	270.713	-0.161653	352.072	270.838	-0.37844	170.852	209.676	0.295415	274.652	228.316	-0.266571	278.879	245.872	-0.181734	0.23085	0
DENND6B	chr7:127484381-127498349	12.9098	11.4614	-0.171679	15.7757	12.2015	-0.370642	18.2841	18.1249	-0.0126145	21.4554	17.178	-0.320771	16.9922	14.5288	-0.225965	0.23085	0
ACSBG1	chr8:58156230-58212485	1.49833	0.735775	-1.02602	0.993688	0.820807	-0.275751	1.49377	1.28353	-0.218839	1.05959	0.904474	-0.228353	1.26324	0.924091	-0.451017	0.23105	0
STK36	chr9:73951034-73978151	3.95947	3.23554	-0.291301	3.9641	3.00839	-0.398002	3.29223	3.39348	0.0436989	3.98887	3.22187	-0.30808	3.82076	3.20181	-0.254969	0.23105	0
FTL	chr1:95929247-95931092	42.4208	50.322	0.246416	51.6219	53.7177	0.0574138	145.919	157.389	0.109167	101.016	134.877	0.417066	83.1652	95.9812	0.206771	0.2311	0
WNT5B	chr4:155747647-155763554	0.708132	0.669363	-0.0812298	0.622043	0.768088	0.304255	0.521343	0.829866	0.670645	0.456262	1.23792	1.43999	0.583314	0.864679	0.567891	0.2314	0
FAM193B	chr17:15110779-15143500	20.4237	17.7595	-0.201652	27.4619	20.7206	-0.40637	31.4973	31.0946	-0.0185633	36.8764	33.5816	-0.135025	28.8438	25.3276	-0.187549	0.23155	0
GNA12	chr12:14275707-14356794	59.8733	72.1549	0.269183	60.8855	69.7976	0.197079	57.2234	52.9958	-0.110726	35.8962	45.9949	0.357641	53.945	60.7422	0.17121	0.23175	0
LOC500956	chr8:19893860-19905696	14.0989	13.3859	-0.0748749	13.9977	12.3693	-0.17843	25.7088	22.0379	-0.222275	23.7866	18.7233	-0.345316	19.1355	16.3629	-0.225821	0.2322	0
EPHX1	chr13:96722969-96752984	4.98181	5.68749	0.191121	6.05808	7.72244	0.350197	7.98938	9.45167	0.242486	8.36249	10.9578	0.38996	6.78789	8.3265	0.294747	0.23225	0
B3GALT2	chr13:57440978-57534385	44.032	38.875	-0.179712	42.9309	38.6957	-0.149845	47.8457	41.0871	-0.219706	44.6233	39.5391	-0.174516	44.8808	39.4081	-0.187606	0.23265	0
CLIC2	chr20:66517-81543	0.264894	0.381472	0.526162	0.191214	0.255393	0.417527	1.25855	2.02522	0.686315	0.88707	1.60879	0.858852	0.627251	1.01991	0.701332	0.2329	0
IGFBP6	chr7:140885387-140890027	0.408163	0.440748	0.110809	0.442676	0.262344	-0.754792	0.722724	0.813268	0.170285	2.99268	1.00785	-1.57016	1.10809	0.612998	-0.854116	0.23335	0
CH25H	chr1:238457017-238458339	1.16557	2.35875	1.01698	1.18175	2.32246	0.974726	4.09592	2.68723	-0.608068	1.83921	3.92903	1.09509	2.01978	2.78888	0.465491	0.23355	0
VGF	chr12:20903303-20906334	13.6777	11.6458	-0.232017	12.5841	12.5199	-0.00738337	26.0707	19.266	-0.436372	21.7039	20.4428	-0.0863634	18.2391	15.6945	-0.216771	0.23365	0
RGD1311756	chr6:125052274-125129572	3.41946	3.31858	-0.0432064	2.59902	4.2189	0.6989	3.27665	4.44859	0.441126	3.09015	3.31415	0.100961	3.0994	3.81066	0.298051	0.2343	0
METTL22	chr10:7157965-7175483	9.95314	8.63432	-0.205069	14.0817	11.0318	-0.352153	14.5891	12.8847	-0.179237	17.4216	14.2935	-0.285522	13.9314	11.5662	-0.268425	0.23445	0
ZMYM3	chrX:89476629-89493310	33.3821	32.2888	-0.0480385	35.8767	32.4896	-0.143067	51.4238	46.9753	-0.130534	53.627	43.0351	-0.317445	43.1724	38.2215	-0.175725	0.2351	0
BEGAIN	chr6:133296174-133317921	25.9596	23.5227	-0.142216	27.0414	23.4792	-0.20379	31.9389	28.0481	-0.187412	30.1211	26.4903	-0.185313	28.6994	25.2099	-0.187029	0.2352	0
PM20D1	chr13:44737879-44755913	0.3306	0.549498	0.733028	0.357195	0.367788	0.0421627	1.19127	0.962687	-0.307363	0.55236	1.51685	1.4574	0.592918	0.824053	0.474905	0.2353	0
CYP2J3	chr5:116742440-116766822	2.87423	2.94183	0.0335385	3.54127	2.38226	-0.571935	5.02439	3.4204	-0.554783	4.62252	4.55161	-0.0223006	3.97741	3.27735	-0.279299	0.23555	0
PSD4	chr3:2622917-2659328	3.23394	3.70993	0.198097	2.84561	4.48436	0.656166	3.31417	3.03434	-0.127264	2.94881	3.50709	0.250144	3.0901	3.69904	0.259499	0.2356	0
GPR156	chr11:64506979-64571771	1.20534	0.966106	-0.319184	1.05073	0.89971	-0.223855	1.02641	0.639632	-0.68229	1.20636	0.696812	-0.79182	1.12577	0.806776	-0.480676	0.23595	0
RPL36	chrUn:25163785-25164539	79.0988	82.4919	0.0605961	155.736	222.468	0.514491	223.357	243.164	0.122583	276.182	320.52	0.214797	180.267	212.538	0.237585	0.2365	0
SLC25A39	chr10:91510851-91515256	19.6249	24.6439	0.328548	27.0648	32.3838	0.258854	38.8144	39.0205	0.00763847	33.1077	41.4667	0.324788	29.3425	33.9305	0.209594	0.2369	0
RASSF4	chr4:152987395-153021524	28.6219	29.7236	0.0544864	24.9073	29.2538	0.232054	34.3355	36.2036	0.0764341	26.5554	36.0113	0.439446	28.557	32.5202	0.187493	0.2371	0
ALDH1L2	chr7:22398066-22450381	0.457189	0.658584	0.526577	0.63118	0.759157	0.266348	0.887924	1.12177	0.337263	0.595823	1.05652	0.826359	0.638096	0.885177	0.472192	0.23715	0
CD164	chr20:45486589-45498166	37.8525	41.033	0.116394	37.185	40.2196	0.113178	61.8665	61.1222	-0.017462	50.1051	70.1739	0.485976	46.314	52.2583	0.174212	0.23775	0
SQRDL	chr3_random:1169460-1176747	1.65765	1.57968	-0.0695084	1.58421	2.5383	0.6801	2.17473	3.93351	0.854982	4.54725	6.04114	0.409826	2.45227	3.42546	0.48218	0.23775	0
SEMA5A	chr2:84725091-85158599	19.3803	22.1551	0.193053	17.3175	20.4985	0.243283	23.7868	25.4359	0.0967048	20.1194	22.6102	0.168387	20.0913	22.5408	0.165963	0.23895	0
FSTL5	chr2:166987747-167672061	16.7599	16.7589	-9.13e-05	19.0306	14.3341	-0.408874	17.4131	16.7467	-0.0562928	16.4424	13.382	-0.297126	17.4752	15.2857	-0.193119	0.2391	0
RCN1	chr3:90832150-90846395	16.659	21.7301	0.383396	18.8873	21.5663	0.191361	25.1928	25.8338	0.0362494	23.8299	27.2182	0.191801	20.9947	23.8828	0.185943	0.2397	0
ITM2A	chrX:95637900-95643845	15.7537	18.4409	0.227212	18.7404	20.9376	0.159948	22.0732	27.1126	0.296669	24.2135	28.201	0.219931	20.0756	23.372	0.219334	0.23975	0
ANO1	chr1:205018519-205166049	1.02389	1.04321	0.0269775	0.974404	1.19179	0.290534	1.67727	1.701	0.0202736	1.29371	2.52635	0.965537	1.23069	1.58167	0.361986	0.2403	0
GIT2	chr12:43117685-43160723	19.2279	17.7165	-0.118105	19.9475	17.7199	-0.170841	30.0805	25.8539	-0.218448	29.2084	25.5837	-0.191161	24.3853	21.4246	-0.186745	0.2405	0
GSTT3	chr20:13595933-13603087	7.83877	7.82536	-0.00246931	7.83454	11.6232	0.56909	11.2977	13.492	0.256083	12.2823	13.9979	0.188627	9.72602	11.5792	0.251612	0.2407	0
PDZD7	chr1:250082091-250111782	5.35054	4.75627	-0.169855	6.0243	5.7247	-0.0735937	7.90817	6.32972	-0.321203	8.86123	5.89148	-0.588876	6.977	5.63397	-0.308454	0.24095	0
TMEM79	chr2:180442063-180446842	0.68602	0.247031	-1.47356	0.791172	0.661425	-0.258413	1.07672	0.678396	-0.666438	1.45247	1.1717	-0.309904	0.98962	0.67328	-0.555669	0.2411	0
DPP7	chr3:3514967-3519220	35.7199	39.0786	0.129651	38.3267	43.8466	0.194116	55.7659	57.1444	0.0352273	52.299	68.34	0.385948	45.1409	51.331	0.185397	0.2419	0
ATP6V0E1	chr10:16741506-16764579	17.9886	24.2412	0.430376	19.3589	24.0028	0.310208	32.1831	29.2458	-0.13807	22.761	33.1283	0.541501	22.8559	27.3766	0.260376	0.24215	0
RASSF3	chr7:60719223-60783887	4.37574	4.55125	0.0567356	4.05259	4.53334	0.161728	4.23393	5.03265	0.249322	3.70332	5.73244	0.630329	4.10743	4.92543	0.262014	0.2424	0
VWF	chr4:161721821-161854761	4.4384	5.20837	0.23079	3.57615	5.17677	0.533646	7.86813	8.13857	0.0487544	5.99796	6.51393	0.119055	5.3971	6.17939	0.19528	0.24335	0
MIOX	chr7:127632432-127634931	1.42089	0.472157	-1.58945	2.01334	1.05378	-0.934022	1.98365	2.56429	0.370402	3.43541	2.13407	-0.686875	2.19251	1.50333	-0.544424	0.2435	0
CD44	chr3:88021661-88110550	18.2035	21.6379	0.249346	18.1759	20.9505	0.204962	33.8935	34.6592	0.0322286	22.4826	28.2031	0.327042	22.9358	25.9919	0.180465	0.2437	0
SLC16A12	chr1:238643039-238665699	2.29544	1.26738	-0.85692	1.71001	1.72133	0.00951898	1.69117	2.54203	0.587963	1.57129	4.50192	1.51859	1.83239	2.44087	0.413668	0.24405	0
STC2	chr10:16514416-16525063	0.44429	1.64944	1.8924	1.91519	1.27696	-0.584776	0.27519	2.15925	2.97203	0.693652	0.52812	-0.393345	0.852783	1.4037	0.718979	0.24495	0
LPL	chr16:22533104-22556905	5.68631	5.99834	0.0770695	6.46476	6.38352	-0.0182454	6.61535	7.57831	0.196059	6.3046	11.1011	0.816223	6.26988	7.6521	0.287417	0.2452	0
CDH24	chr15:32710084-32719052	24.117	22.2655	-0.115241	29.2771	25.3781	-0.206193	26.9878	25.6612	-0.0727184	28.7092	23.1538	-0.310261	27.3014	24.0334	-0.183935	0.2453	0
NOTCH1	chr3:4631796-4677640	8.1667	9.96139	0.286595	7.84987	9.21577	0.231436	10.0577	10.8907	0.114796	7.93647	8.40864	0.0833754	8.49076	9.59455	0.176321	0.24545	0
CYP2D1	chr7:120769700-120774105	1.45205	1.24174	-0.225727	0.719924	1.10832	0.622453	1.28967	2.20383	0.773013	1.18404	2.14381	0.856457	1.16062	1.64041	0.499161	0.24585	0
GUCY1A2	chrUn:47405809-47455663	5.53886	8.34592	0.591483	5.72637	7.07874	0.305872	2.48858	3.47683	0.482446	2.42348	3.06467	0.338651	4.14401	5.61451	0.438134	0.246	0
LOC498662	chr16:80461694-80489957	6.84658	8.92536	0.382527	7.31792	9.36697	0.35615	7.28268	7.91272	0.119703	8.07939	8.67564	0.102724	7.38311	8.72464	0.240867	0.246	0
GALNT18	chr1:169251519-169567075	19.453	22.5957	0.216055	18.6941	24.1144	0.367311	16.4277	16.8337	0.0352225	16.3468	17.8293	0.125239	17.8498	20.4746	0.19793	0.2461	0
GLIPR1	chr7:51081711-51092707	4.54718	2.33258	-0.963043	2.34074	2.30162	-0.0243175	7.39714	3.69168	-1.00269	3.18899	4.68475	0.554872	4.32048	3.18873	-0.43821	0.24685	0
SCD1	chr1:249458859-249471460	5.76176	6.20396	0.10668	6.3084	7.34422	0.219335	6.23087	8.09535	0.37766	7.66319	8.73436	0.188756	6.4827	7.52513	0.215123	0.2473	0
IDUA	chr14:1573194-1587546	17.8098	15.216	-0.227075	18.5589	15.2216	-0.285992	29.5963	25.6677	-0.205464	27.0799	25.7277	-0.073899	23.021	20.0926	-0.196292	0.24735	0
SLC2A1	chr5:139690803-139719021	89.4764	92.8884	0.0539912	93.856	88.6413	-0.0824694	74.2873	81.0621	0.125911	83.1445	124.285	0.579955	85.7744	96.1502	0.164743	0.24735	0
AARD	chr7:88346188-88351030	3.01374	1.98924	-0.599339	2.17513	1.37211	-0.664705	3.35956	2.11684	-0.666364	2.81088	2.93044	0.0600958	2.83257	2.07292	-0.450444	0.2484	0
IGSF9	chr13:88487238-88503824	56.4134	50.3883	-0.16295	72.538	57.3481	-0.338991	60.4365	64.1563	0.0861705	82.2615	72.7657	-0.176959	67.9013	60.5693	-0.164852	0.2486	0
MRPL34	chr16:18636091-18636883	27.7497	36.5276	0.396514	33.6252	38.2806	0.187073	45.1972	53.1875	0.234853	43.8409	52.1147	0.249414	37.2884	44.4568	0.253677	0.24925	0
MT3	chr19:11284553-11286402	78.728	93.3975	0.246508	91.1879	115.248	0.337825	61.7709	74.7668	0.275471	58.4231	71.8718	0.298887	73.3843	89.51	0.286577	0.2493	0
UBE3D	chr8:91537390-91704052	1.34375	2.5682	0.934489	1.84439	1.94336	0.0754067	1.82	2.29311	0.333369	1.85662	2.27985	0.296255	1.71272	2.26575	0.403697	0.24935	0
CCDC173	chr3:51903510-51937671	1.15346	1.72068	0.577008	0.831677	0.847318	0.0268813	1.02244	1.32328	0.372108	0.79713	1.61252	1.01643	0.955752	1.36859	0.517981	0.2495	0
WNT7B	chr7:123531766-123572989	1.88913	1.60557	-0.234635	1.42931	2.12382	0.571344	0.653866	1.36632	1.06323	0.408359	2.58589	2.66275	1.12999	1.91216	0.758887	0.2497	0
DSE	chr20:37568888-37647574	1.42536	1.26415	-0.173162	0.781395	1.47683	0.918382	1.89276	1.79898	-0.0733165	1.00058	1.95785	0.968427	1.26729	1.60493	0.340767	0.24985	0
PPP1R12C	chr1:68048687-68071624	49.5781	45.7458	-0.116064	56.0885	47.8736	-0.228474	42.6599	39.6319	-0.106219	41.0889	35.9185	-0.19402	47.7665	42.4596	-0.169908	0.25005	0
RGD1560880	chr3:3403403-3404494	1.81841	1.24939	-0.54146	2.15363	0.956258	-1.1713	2.16652	1.82737	-0.245613	1.72239	0.965326	-0.835321	1.96973	1.23787	-0.670137	0.25045	0
SSMEM1	chr4:57419709-57429788	0.670621	1.59365	1.24877	1.59633	1.22849	-0.377875	1.51705	2.48672	0.712979	2.38739	3.2947	0.464712	1.52376	2.10189	0.464055	0.2508	0
CMTM5	chr15:33039011-33041692	11.5712	14.3927	0.314793	12.8227	17.5464	0.452472	21.4677	22.5257	0.069409	17.8295	22.9203	0.362364	15.7388	19.0908	0.27855	0.25125	0
PLEKHN1	chr5:173056073-173069548	7.71555	5.5326	-0.479813	8.80832	6.94198	-0.343519	13.2276	11.0551	-0.25885	16.1603	11.7641	-0.45806	11.3266	8.64401	-0.389937	0.25205	0
MYO16	chr16:83812188-84724836	6.36849	4.73676	-0.427052	5.38574	5.39086	0.00137107	6.00395	5.37461	-0.159751	5.64358	4.99615	-0.175796	5.86639	5.10748	-0.199861	0.25225	0
MUTYH	chr5:137103957-137115897	4.03801	2.27579	-0.827278	4.49441	2.93402	-0.615251	5.35701	5.13017	-0.0624195	5.58357	5.2798	-0.0807062	4.84537	3.81602	-0.344537	0.2526	0
TTC14	chr2:120105438-120154958	18.928	18.1033	-0.0642698	20.5909	15.8337	-0.379011	25.5894	24.5726	-0.0584945	26.058	19.1196	-0.446673	22.6717	19.2149	-0.238666	0.2528	0
CACHD1	chr5:121431271-121659471	3.06391	4.15855	0.440705	3.57859	3.76647	0.073823	3.65266	4.10564	0.168658	3.74084	4.67474	0.321524	3.50613	4.15426	0.24471	0.25285	0
RPS29	chr6:91115708-91117085	1720.3	2272.37	0.401538	1930.89	2043.11	0.0815011	966.756	886.549	-0.124952	841.066	944.666	0.167585	1393.7	1570.93	0.17269	0.25295	0
6330403A02RIK	chr13:96148640-96204219	1.31431	1.88711	0.521877	1.25153	1.83411	0.551389	0.886089	0.917527	0.0502986	1.0116	0.995131	-0.0236801	1.12838	1.43255	0.344326	0.253	0
PON2	chr4:30033228-30068643	41.4702	40.9951	-0.0166238	36.8213	45.0209	0.290058	74.8489	66.2074	-0.176988	60.3786	91.0559	0.592716	52.672	59.6002	0.178282	0.25325	0
SOWAHA	chr10:38945216-38948786	4.07306	5.55509	0.447699	4.18273	5.26392	0.331692	3.77052	3.29763	-0.193337	3.03046	3.96007	0.38599	3.79218	4.56289	0.266923	0.25335	0
CD99L2	chr15:5673663-5719158	12.2462	14.4833	0.242057	13.07	13.9818	0.0972873	12.5672	12.8444	0.0314795	10.539	14.1437	0.424426	12.1605	13.8537	0.188067	0.25365	0
NABP1	chr9:47194890-47201876	1.70644	1.93126	0.178553	1.93251	1.72361	-0.165048	6.11969	3.4026	-0.846821	4.09263	3.85867	-0.0849278	3.37297	2.66849	-0.337995	0.2546	0
PLK5	chr7:10858117-10866537	22.5575	18.3492	-0.29789	26.4289	22.1387	-0.255547	38.5344	38.113	-0.0158643	38.5493	33.19	-0.215956	31.1871	27.4073	-0.186388	0.255	0
ATXN2L	chr1:185635842-185647320	47.7839	41.9284	-0.188596	53.8558	45.6569	-0.238269	80.3873	80.073	-0.00565148	88.8485	75.8784	-0.227657	66.9263	59.6981	-0.164888	0.2554	0
ZBTB40	chr5:155745632-155813330	8.075	7.50872	-0.104896	8.69403	6.92193	-0.32885	6.38901	6.08538	-0.0702464	6.73583	5.33909	-0.335263	7.54299	6.49444	-0.215931	0.2554	0
PCOLCE	chr12:19672504-19690374	0.389666	0.631367	0.696241	0.351319	0.500923	0.511807	3.16402	3.41516	0.110195	3.03137	5.34031	0.816952	1.66031	2.35172	0.502262	0.25545	0
SFSWAP	chr12:28179090-28249470	16.6782	14.9205	-0.160675	20.3766	17.8208	-0.193355	25.1977	22.0762	-0.190794	25.6541	22.8834	-0.164891	21.8284	19.1898	-0.185868	0.25555	0
LIX1L	chr2:191399901-191426502	17.3569	19.1336	0.140603	19.2436	18.8022	-0.0334778	19.8804	23.7384	0.255876	21.329	27.2866	0.355374	19.4335	21.991	0.178368	0.2558	0
PLS1	chr8:100825542-100858153	6.34422	8.28786	0.385558	6.7538	7.58667	0.167767	6.59565	8.54741	0.373972	6.15053	6.97429	0.181336	6.47993	7.83615	0.274165	0.25625	0
ADAMTS10	chr7:16043112-16072984	3.82592	3.92661	0.0374783	3.52877	4.19753	0.250376	6.06021	7.53247	0.313755	4.77966	7.37763	0.626251	4.50739	5.64177	0.323855	0.25635	0
RASAL1	chr12:37047908-37080129	0.612042	0.348009	-0.814505	1.32286	0.838566	-0.657667	1.77347	1.44315	-0.297352	1.56089	1.36023	-0.198524	1.29914	0.969859	-0.421712	0.2564	0
CREB3L2	chr4:64703457-64816668	6.49781	7.02005	0.111528	5.43462	6.81536	0.32661	6.13455	5.93404	-0.0479432	3.91689	6.20329	0.663324	5.53264	6.50373	0.233301	0.257	0
CREG1	chr13:81491303-81503755	17.6885	21.248	0.264514	19.173	22.7825	0.248854	22.9146	23.9028	0.060911	22.3008	26.287	0.237252	20.4457	23.4041	0.19496	0.2571	0
NTHL1	chr10:13883279-13889790	1.46031	1.35181	-0.111375	0.791017	1.50849	0.931321	1.90121	1.9783	0.0573415	0.692181	2.43454	1.81443	1.20767	1.79039	0.568049	0.25725	0
RDH10	chr5:2285267-2314275	31.0291	36.3562	0.228578	30.3796	36.5822	0.26804	22.4731	23.3744	0.0567279	19.517	27.6511	0.502605	26.1824	31.2495	0.255238	0.25775	0
BCAM	chr1:79067351-79081739	7.92909	10.1349	0.354104	8.44371	10.3697	0.296428	16.5763	15.0337	-0.140929	11.7702	16.4822	0.485774	11.0253	12.8077	0.216198	0.2582	0
SOX12	chr3:142711858-142715905	26.2788	22.8637	-0.20084	29.0572	23.9106	-0.281249	20.9671	22.6289	0.110043	45.6941	29.9723	-0.608377	30.4574	24.6975	-0.302427	0.25865	0
RAD9B	chr12:35412462-35443713	1.62766	1.63698	0.00824346	1.57833	2.48923	0.657298	3.51924	4.22849	0.264879	2.77704	4.07338	0.552682	2.33574	3.03507	0.377854	0.25885	0
SST	chr11:79124990-79126216	29.6175	22.3506	-0.406136	27.2581	26	-0.0681723	34.1842	20.9077	-0.709298	20.746	21.8473	0.0746229	28.021	22.801	-0.297408	0.259	0
GPR135	chr6:94262987-94264361	3.333	2.64008	-0.33624	3.76745	2.14231	-0.81442	1.72062	2.05278	0.254651	2.18831	1.47285	-0.571208	2.80471	2.09161	-0.423241	0.2591	0
S100A4	chr2:182885069-182887380	19.948	27.8921	0.483616	23.0208	22.0797	-0.0602165	38.7466	44.4084	0.196766	23.9118	38.3589	0.681842	26.1546	32.6167	0.31855	0.25915	0
CASQ1	chr13:88200505-88210418	1.71199	2.07354	0.276424	2.63682	1.25046	-1.07634	3.29525	1.97853	-0.735954	4.21491	3.89401	-0.114243	2.92743	2.25712	-0.37515	0.2592	0
PTPRU	chr5:150611822-150695183	2.71261	3.21841	0.246667	3.77164	3.05704	-0.303058	2.87595	3.70743	0.366381	2.88035	4.75234	0.722394	3.07638	3.64258	0.243728	0.25925	0
NQO1	chr19:37251127-37266051	1.8623	2.54372	0.449857	1.86585	2.34325	0.328675	4.34602	4.27343	-0.0243	2.91989	5.3952	0.885764	2.70172	3.55865	0.39745	0.2593	0
L3MBTL3	chr1:19445630-19544437	3.05139	3.67698	0.269055	2.47297	2.7157	0.135077	2.84606	3.39481	0.254365	2.46683	3.69955	0.584687	2.71873	3.35472	0.303257	0.25935	0
PRORSD1	chr14:110529021-110533157	5.0053	6.48392	0.373408	3.87051	7.78439	1.00806	6.90241	7.78436	0.173477	8.18766	8.20861	0.0036873	5.92144	7.51925	0.34464	0.2596	0
NPC2	chr6:108793847-108814768	80.6341	87.6297	0.120029	87.0235	102.671	0.238549	149.547	134.803	-0.149745	85.3274	128.895	0.59512	99.7744	112.093	0.167954	0.26095	0
CABP7	chr14:85354283-85395730	1.00715	1.2998	0.36801	1.02155	1.62611	0.670667	1.50379	1.70553	0.181616	1.53144	2.24053	0.548952	1.2547	1.69814	0.436614	0.2611	0
L3MBTL2	chr7:120016772-120047519	22.949	20.4717	-0.164798	25.7342	21.5174	-0.258186	25.1424	23.1112	-0.12153	25.1609	21.8834	-0.201341	24.7786	21.6464	-0.19497	0.262	0
SHISA6	chr10:52896361-53190809	8.84092	7.5035	-0.236633	4.9872	5.96673	0.25871	7.19919	3.95912	-0.862654	5.20397	3.49747	-0.573299	6.59464	5.31234	-0.311946	0.2624	0
SLC25A20	chr8:113715181-113737063	8.11126	10.3722	0.354725	10.5611	13.247	0.326902	17.3462	18.4806	0.0913915	16.6741	19.7353	0.243172	12.9813	15.1971	0.227365	0.26265	0
FGFR4	chr17:15512143-15527348	7.25826	7.31674	0.0115774	7.31807	6.72257	-0.122451	10.1341	7.35777	-0.461879	8.89603	7.41077	-0.263539	8.35551	7.17467	-0.219815	0.2636	0
GABRA5	chr1:108821427-108955798	0.677876	1.04068	0.618429	0.848348	0.72237	-0.231918	0.918434	1.28769	0.487537	0.67776	1.28097	0.918389	0.780742	1.06866	0.452886	0.26385	0
SP7	chr7:141109770-141118397	1.39346	1.15855	-0.266357	2.2787	1.62633	-0.486593	1.40356	1.07317	-0.387217	2.26371	1.35441	-0.741025	1.83989	1.30476	-0.495827	0.26415	0
FHDC1	chr2:176220903-176258572	2.86459	3.33668	0.220084	2.65951	2.6756	0.00870099	5.48443	5.21463	-0.0727755	3.99324	6.77323	0.762285	3.70025	4.40057	0.250068	0.26455	0
TMEM121	chr6:138190638-138192172	5.20456	6.12001	0.233757	4.63314	4.44626	-0.0593969	3.88601	5.75435	0.566363	2.51459	4.45315	0.824505	4.11609	5.18862	0.334075	0.26455	0
NRARP	chr3:3341924-3344473	6.83807	7.42624	0.119043	7.07964	9.16071	0.371783	11.2162	12.677	0.176632	10.6885	12.6107	0.23859	8.8617	10.3093	0.218298	0.2647	0
SLCO3A1	chr1:129571169-130077200	12.1909	14.0237	0.202055	13.228	15.0813	0.189163	10.2116	11.2652	0.141663	10.1875	14.7234	0.531319	11.5521	13.7873	0.25519	0.2649	0
DOK6	chr18:86180758-86659236	34.9167	35.0255	0.00448901	34.4354	26.9654	-0.352779	18.6895	16.7413	-0.158823	14.7829	8.31287	-0.830506	26.2703	22.277	-0.23788	0.2657	0
SCTR	chrUn:57599966-57635782	2.57553	3.42404	0.410832	2.9295	3.56558	0.283483	5.70675	6.22714	0.125901	4.25669	6.44165	0.597697	3.80936	4.81687	0.338546	0.2657	0
ZFP871	chr7:13423657-13446138	3.7854	2.74341	-0.464477	3.55622	3.08299	-0.206012	4.3273	3.93482	-0.137172	4.25376	3.67585	-0.210661	3.97261	3.32363	-0.257328	0.26585	0
RPS-8	chr17:95246915-95247542	1.58359	0.488373	-1.69714	1.47672	1.09051	-0.437392	4.76173	5.18665	0.123318	10.348	5.76881	-0.84301	4.39329	2.98363	-0.558234	0.26595	0
PRPF4B	chr17:36316531-36350727	38.7119	37.0517	-0.0632362	38.5002	35.1164	-0.132719	45.6703	43.7721	-0.0612441	50.738	39.9523	-0.344789	43.2458	38.707	-0.159965	0.2661	0
SRSF2	chr10:106948685-106956880	183.741	139.815	-0.394152	183.63	161.246	-0.187542	226.667	213.672	-0.0851782	272.462	234.507	-0.216423	215.357	184.612	-0.222231	0.26635	0
LDLRAD3	chr3:87105729-87339574	4.8604	5.66564	0.221163	3.75891	4.88349	0.377598	3.36218	3.87321	0.204132	3.17788	3.754	0.240365	3.82951	4.57857	0.257736	0.26725	0
PMM1	chr7:120323805-120334094	78.1854	87.2676	0.158546	86.6223	97.0763	0.164381	81.869	97.4737	0.251696	99.4438	109.568	0.139874	86.5253	97.2581	0.168696	0.26785	0
TRIM47	chr10:106211264-106215736	1.57323	1.97515	0.328238	1.93061	3.73057	0.950334	3.42047	3.22507	-0.0848666	2.19396	2.54612	0.214764	2.25193	2.85835	0.344017	0.2679	0
NXN	chr10:67775925-67914156	38.4261	43.8741	0.191284	40.2765	46.0517	0.193315	44.0825	43.7504	-0.0109089	36.6789	49.7192	0.438852	39.9131	45.6843	0.194835	0.26805	0
FXYD1	chr1:86095256-86099391	42.3574	45.2446	0.0951325	61.8621	55.2073	-0.164197	159.928	98.7913	-0.694964	103.511	116.697	0.172991	89.7234	77.0477	-0.219733	0.26835	0
SNRPG	chr4:120549594-120557144	35.8438	47.8559	0.416972	15.2946	48.9949	1.67961	80.198	66.8491	-0.26266	68.6691	77.9239	0.182405	48.7325	59.5406	0.288989	0.269	0
ACADS	chr12:42765283-42774528	3.21365	4.12988	0.361885	3.35589	4.06	0.274785	5.42312	6.54361	0.270964	4.20856	5.56342	0.402645	4.01363	5.00264	0.317782	0.26915	0
LRRK2	chr7:130105901-130267747	4.2604	4.71247	0.145492	3.75113	4.08604	0.123379	3.65586	4.45552	0.285384	2.98465	3.80497	0.35032	3.69052	4.26343	0.208192	0.2693	0
MAPK11	chr7:127443073-127449992	10.2692	8.64803	-0.247883	11.8085	9.83306	-0.264115	12.7614	10.1796	-0.32611	10.9472	9.18398	-0.253375	11.445	9.42295	-0.280469	0.2695	0
TNNT1	chr1:68034661-68045154	0.127385	0.275223	1.11141	0.138124	0.860928	2.63993	0.68024	0.957138	0.492683	0.93992	0.94913	0.0140678	0.453742	0.746226	0.71774	0.2696	0
C2CD4D	chr2:189334822-189336967	2.31691	1.89847	-0.287369	2.4215	1.00137	-1.27393	0.81659	1.16532	0.513042	1.07541	0.548267	-0.97194	1.70246	1.16972	-0.541462	0.27025	0
GJA4	chr5:146755060-146757594	1.36415	1.13866	-0.260671	1.34158	0.956536	-0.488046	1.91731	1.34458	-0.511926	1.79227	1.19315	-0.587018	1.59311	1.149	-0.471463	0.27075	0
ALOX5AP	chr12:6245807-6269796	2.56449	3.29691	0.362439	2.38285	2.47246	0.0532566	8.24229	9.0251	0.130897	4.91372	9.15994	0.898523	4.41329	5.78826	0.391273	0.27095	0
DOK1	chr4:117242747-117245209	0.448703	0.424114	-0.0813079	0.242654	0.757074	1.64153	1.08212	1.35048	0.319604	1.00482	1.51568	0.593036	0.67646	0.983483	0.539896	0.27125	0
EDN2	chr5:140742685-140747580	5.53215	2.98451	-0.890344	3.6883	6.51849	0.821581	7.56903	9.76326	0.367254	5.70664	12.9803	1.18561	5.57822	7.83781	0.490646	0.27185	0
TRIP10	chrUn:64559532-64572821	7.74986	7.12482	-0.121316	8.73845	7.73694	-0.175613	14.0203	11.362	-0.303301	14.2638	11.847	-0.267835	11.0509	9.36797	-0.238352	0.27225	0
NXPH4	chr7:67502667-67516857	2.90182	4.34387	0.582025	3.51399	4.80643	0.451853	8.1247	8.9249	0.135522	6.24481	8.66422	0.472412	5.09073	6.54037	0.3615	0.27235	0
SNTA1	chr3:144843677-144874241	8.78011	8.51021	-0.0450443	8.8804	10.9787	0.306005	8.69222	10.8231	0.316314	10.0128	12.7408	0.347613	9.10074	10.6727	0.229875	0.27235	0
LAPTM4A	chr6:32409534-32427932	169.63	184.87	0.124126	186.492	199.066	0.0941312	205.567	199.542	-0.0429177	157.884	227.583	0.527529	180.096	201.615	0.16284	0.2724	0
C3AR1	chr4:159326401-159333433	2.14798	0.907988	-1.24224	1.06026	1.30561	0.300312	3.55504	2.04051	-0.800939	1.44207	1.95659	0.440203	2.02782	1.52134	-0.414586	0.2729	0
FBXO31	chr19:51823604-51837223	23.6378	16.1966	-0.545404	15.0595	14.501	-0.0545208	10.3554	8.66636	-0.256891	20.4081	11.7029	-0.802277	17.5513	12.8961	-0.444645	0.27315	0
SIDT1	chr11:57926683-58024032	4.63288	3.62512	-0.35388	3.93234	3.74785	-0.0693243	4.89738	4.14837	-0.239465	4.7927	3.96377	-0.273968	4.55934	3.85058	-0.243748	0.2734	0
FASTKD1	chr3:51831437-51857646	3.42369	3.2399	-0.079599	4.69806	3.56601	-0.397756	5.60978	5.71678	0.0272574	6.47183	4.72784	-0.452991	5.00652	4.24644	-0.237554	0.27385	0
PPM1N	chr1:78641172-78644507	14.2389	12.5666	-0.180247	15.4685	10.749	-0.525128	10.5821	14.5567	0.460057	17.4765	12.0411	-0.537449	14.5117	12.4008	-0.226784	0.27405	0
GNAT2	chr2:203652353-203661377	143.248	130.859	-0.130507	141.862	126.419	-0.166278	186.455	174.135	-0.098617	184.235	160.722	-0.196981	163.118	146.509	-0.154921	0.2741	0
RTEL1	chr3:170461570-170496959	17.2126	16.2311	-0.0847061	18.7849	16.6483	-0.174201	19.9422	18.2737	-0.126061	22.2212	18.6145	-0.255509	19.5014	17.339	-0.169554	0.27435	0
ADM	chr1:168380254-168382426	0.366049	0.632616	0.789296	0.475373	0.49409	0.0557133	0.450369	1.01494	1.17222	1.17478	1.68053	0.516524	0.608287	0.93001	0.612494	0.27505	0
RXRB	chr20:4954331-4961065	26.7211	23.276	-0.199139	29.5381	26.8063	-0.140006	45.9411	40.6129	-0.177846	46.8721	42.644	-0.136388	36.8342	32.7488	-0.169603	0.2753	0
BCKDHB	chr8:88997978-89191017	19.4322	22.3654	0.202819	21.8954	25.7126	0.231851	25.8154	27.9536	0.114802	25.4456	31.0178	0.285684	23.0566	26.5295	0.202419	0.2754	0
IL4R	chr1:184612902-184637863	6.12882	5.49498	-0.157494	6.64933	7.5274	0.178943	11.0593	13.0966	0.243932	7.93189	10.9772	0.468776	7.86559	9.08083	0.20727	0.276	0
CCDC80	chr11:57222550-57257169	2.23618	2.41123	0.108737	2.43392	2.06882	-0.234475	2.37484	2.74688	0.20996	3.28887	5.44497	0.727333	2.57694	3.10581	0.269307	0.2762	0
TPM2	chr5:59994100-60003407	1.54662	2.26556	0.550749	1.4365	1.38462	-0.05307	3.85555	2.10249	-0.874839	5.78022	3.19559	-0.855042	3.07156	2.20861	-0.475833	0.27635	0
CRIM1	chr6:962023-1143279	20.6332	20.5052	-0.00897494	18.1003	18.5925	0.0387034	13.7838	13.2679	-0.0550366	10.8335	20.5066	0.920587	16.0736	18.2606	0.184044	0.27645	0
LOC100359977	chr5:151901500-151905327	0.278559	0.601586	1.11079	0.604293	0.268562	-1.16999	0.923467	1.45473	0.655616	0.453048	1.54508	1.76995	0.557759	0.933547	0.743082	0.2765	0
PRDX4	chrX:61501140-61516286	13.1484	15.7607	0.261448	9.92359	16.3917	0.724036	21.9701	20.5569	-0.0959175	20.3625	25.6926	0.335443	16.1165	19.3414	0.263152	0.27695	0
NMNAT3	chr8:103472425-103584246	6.47083	7.55839	0.224128	6.14449	6.74604	0.134747	6.68092	7.81794	0.226741	6.29612	8.83051	0.488032	6.40775	7.68593	0.262401	0.27745	0
GNL2	chr5:144373790-144408020	20.0974	18.7023	-0.103793	22.1626	17.6958	-0.324719	29.2461	27.954	-0.0651923	31.8978	27.5541	-0.21119	25.6461	22.6342	-0.180236	0.27775	0
CCK	chr8:126492635-126499220	3.75095	5.8717	0.646522	4.89041	5.2436	0.100603	4.13725	5.06109	0.290777	3.56362	6.22803	0.805433	4.10597	5.5865	0.444222	0.2785	0
ECU04_0700	chr11:84270128-84270965	63.5295	61.6307	-0.0437773	67.9853	45.073	-0.59296	58.462	53.9236	-0.11658	52.0079	52.601	0.0163597	60.9202	53.2079	-0.19528	0.2785	0
NTS	chr7:40474653-40484058	1.69256	0.664558	-1.34874	0.667929	0.741732	0.151204	1.01349	1.36805	0.432793	1.73752	0.451842	-1.94313	1.27817	0.797909	-0.679788	0.2788	0
CD151	chr1:201653959-201657967	41.5887	48.534	0.222805	45.5034	52.6386	0.210147	61.6905	56.8569	-0.117713	45.1063	60.5589	0.425008	48.2674	54.2657	0.16899	0.2789	0
LGI1	chr1:242593052-242634490	2.23144	2.03688	-0.13162	2.92174	4.15861	0.509272	1.75304	2.71465	0.630908	1.29163	1.76591	0.451218	2.08231	2.68492	0.3667	0.27915	0
MXRA8	chr5:172698112-172702607	5.92289	6.69733	0.177284	6.33043	7.49865	0.244327	11.8045	9.57352	-0.302209	8.06378	14.2705	0.823507	7.93279	9.34187	0.235884	0.2794	0
DDHD2	chr16:70694503-70723976	14.7407	13.3083	-0.14748	14.8115	12.2756	-0.270931	16.4904	15.7629	-0.0650875	15.0538	12.6305	-0.253214	15.2789	13.4201	-0.187151	0.27945	0
CBX7	chr7:118148412-118165721	29.0132	29.4048	0.0193427	34.3516	28.8389	-0.25236	39.2452	34.785	-0.174051	39.8439	34.6788	-0.200304	35.4683	31.6818	-0.162874	0.2796	0
LYRM7	chr10:40246613-40265653	1.73872	2.84762	0.71173	2.60853	2.59568	-0.00712414	8.5024	10.0197	0.236892	8.27777	10.6098	0.35808	5.11573	6.27368	0.294373	0.2797	0
IRF3	chr1:95462428-95475493	14.4732	12.2835	-0.236667	19.8744	16.1657	-0.297979	48.2575	46.5522	-0.0519033	53.2089	43.74	-0.282715	33.0814	28.6724	-0.206358	0.2802	0
KRT8	chr7:140713901-140721199	0.703765	1.20368	0.774285	0.570935	0.508898	-0.16595	1.57412	2.2747	0.531134	1.74847	2.44188	0.481899	1.12342	1.5592	0.472915	0.28025	0
ADAMTS12	chr2:60421409-60721150	1.46526	1.55106	0.0820978	1.31501	1.83275	0.478936	1.82713	1.92796	0.0774968	1.44998	1.87267	0.369065	1.51029	1.78505	0.241141	0.2808	0
PLEKHH1	chr6:101664128-101722655	3.56579	2.99055	-0.25381	4.04396	3.5655	-0.181664	3.94314	3.63235	-0.118441	4.67971	3.06298	-0.611483	4.05423	3.3017	-0.29622	0.28095	0
DONSON	chr11:31652218-31661872	10.0013	8.45842	-0.241722	10.4867	10.0952	-0.0548903	11.9876	10.2683	-0.223348	12.3109	9.78635	-0.33109	11.1689	9.60353	-0.217855	0.28105	0
SLCO2B1	chr1:156992491-157028887	12.4323	11.4913	-0.113548	13.2298	11.6943	-0.177989	14.9042	10.7174	-0.475763	9.15109	9.87813	0.110294	12.4689	10.9576	-0.186396	0.2811	0
KCNT2	chr13:53407503-53803012	1.98631	1.79284	-0.147845	1.92875	1.52724	-0.336741	1.82848	1.4874	-0.297848	1.76971	1.20389	-0.55581	1.88724	1.50907	-0.322617	0.2814	0
PLAU	chr15:3680071-3686232	0.590513	0.58475	-0.0141483	0.425691	0.806566	0.921985	1.3267	1.38066	0.0575069	0.547968	1.37279	1.32495	0.710828	1.01277	0.510736	0.2815	0
FAM214B	chr5:59523078-59536736	7.164	6.43432	-0.154978	9.42443	8.26555	-0.189294	11.3648	8.43462	-0.430178	9.97291	8.53182	-0.225162	9.43029	7.86071	-0.262642	0.2819	0
FN1	chr9:70702157-70771208	10.6923	9.70414	-0.139898	11.0031	10.197	-0.109763	16.5313	15.3139	-0.110357	15.0316	12.5471	-0.260642	13.2022	11.7899	-0.163224	0.2821	0
CC2D2A	chr14:72514416-72599418	19.6544	18.2658	-0.105713	22.3356	16.8392	-0.40752	29.4367	34.7842	0.240816	45.8441	35.9024	-0.352654	28.9433	25.8495	-0.163094	0.28215	0
CREM	chr17:62770631-62838996	8.32974	6.9707	-0.256968	8.55995	6.66685	-0.360597	13.6659	10.712	-0.351351	12.1898	11.4557	-0.0896061	10.5808	8.80147	-0.265629	0.2835	0
ISM1	chr3:127873039-127932163	0.665865	1.1979	0.847206	1.69005	1.49788	-0.174143	0.709178	0.318667	-1.1541	0.172474	2.52074	3.8694	0.82986	1.37864	0.73231	0.28405	0
CAV1	chr4:42956101-42989056	91.6991	107.618	0.23094	94.6572	106.691	0.172657	73.3586	108.845	0.569238	111.789	102.534	-0.124675	93.1887	106.211	0.188712	0.28445	0
DROSHA	chr2:62336015-62447574	37.894	33.0986	-0.1952	36.1282	32.6414	-0.146424	46.7765	45.5939	-0.0369447	49.2366	42.7244	-0.204673	42.3039	38.0808	-0.151725	0.28445	0
RPS20	chr5:17119796-17120959	13.3858	17.0322	0.347565	15.3713	23.162	0.591518	27.0478	31.9527	0.240425	21.0176	23.6738	0.171698	18.9612	23.6519	0.318903	0.2845	0
FOSL1	chr1:208090611-208099118	2.46846	3.23785	0.391427	2.47936	3.34326	0.431285	2.42677	2.96327	0.288153	1.60191	2.03913	0.348159	2.26083	2.9123	0.365308	0.2848	0
DOCK10	chr9:79839311-80101073	3.3541	2.66428	-0.332177	2.82709	2.91839	0.0458523	4.49086	3.61021	-0.314909	3.47069	3.11397	-0.156469	3.51732	3.05152	-0.20495	0.28495	0
YPEL4	chr3:67945793-67947571	21.2688	23.6953	0.155863	25.5256	23.4616	-0.121641	44.0644	31.7466	-0.473011	38.8122	33.6164	-0.207346	31.9644	27.7886	-0.201976	0.2857	0
CHRD	chr11:82401700-82410401	0.931145	0.887631	-0.0690456	1.39081	0.897767	-0.631512	1.68341	1.33779	-0.331537	1.61607	1.26679	-0.351314	1.39403	1.08245	-0.364967	0.28635	0
ETF1	chr18:27385200-27413631	35.9082	38.662	0.106605	33.9484	39.1416	0.205358	44.4911	48.9961	0.139148	43.0698	50.6227	0.233108	39.1953	43.9197	0.164189	0.28635	0
ETV5	chr11:80846285-80904013	19.1746	21.2053	0.145228	17.658	19.9497	0.176047	26.3568	29.5535	0.165154	21.8093	24.84	0.187718	21.1314	23.6302	0.161244	0.28655	0
GARS	chr4:83718583-83759591	24.1561	18.5069	-0.384325	27.6126	20.0664	-0.460544	27.446	30.5381	0.154017	27.0564	26.7151	-0.0183171	26.5865	23.6131	-0.171106	0.28695	0
CWF19L1	chr1:249096947-249120184	19.815	18.0629	-0.133562	22.8102	18.5621	-0.297318	20.2862	19.6027	-0.0494458	23.9174	20.9055	-0.194177	21.7397	19.1782	-0.180868	0.28735	0
TMEM189	chr3:158778661-158790254	18.7609	21.7584	0.213843	22.5774	25.1965	0.158347	25.8265	28.3424	0.134112	23.4514	28.9737	0.305068	22.5848	25.8436	0.194452	0.2874	0
ASPDH	chr1:94942787-94945049	0.123362	0.266493	1.1112	0.133734	0.118925	-0.169314	1.07133	2.04072	0.929679	0.708741	0.984347	0.473909	0.488054	0.810536	0.731834	0.2876	0
CD48	chr13:87684544-87708091	14.7676	16.9483	0.198702	11.0635	15.5386	0.490055	31.8682	25.1263	-0.342916	17.892	30.1312	0.751944	18.5781	21.5435	0.213654	0.28785	0
CLK4	chr10:36776244-36800698	15.3379	14.2028	-0.110921	17.8066	14.3474	-0.31162	30.4961	29.5562	-0.0451635	34.8483	28.2943	-0.300573	24.2277	21.1049	-0.199076	0.28825	0
EFNB2	chr16:86187493-86230978	28.8685	26.0118	-0.150328	34.8324	23.2901	-0.580712	21.9463	16.6234	-0.40076	16.2471	19.455	0.25996	25.8774	21.4992	-0.267408	0.28825	0
ENTPD2	chr3:3564379-3569801	3.04173	3.28584	0.111373	3.56337	3.61696	0.0215336	5.35817	7.02755	0.391282	5.59681	7.77223	0.473724	4.33829	5.29306	0.286975	0.28825	0
RGD1564171	chr2:182287918-182290953	1.32458	0.714887	-0.889751	1.68091	0.42567	-1.98144	4.0933	2.53704	-0.69012	4.46312	4.23338	-0.0762416	2.81858	1.889	-0.577344	0.28925	0
ST8SIA2	chr1:129158715-129191810	17.4676	21.9894	0.332128	14.1653	18.9073	0.416582	8.72454	12.4214	0.509683	11.0047	8.05642	-0.449905	13.0495	15.6188	0.25929	0.2897	0
APOLD1	chr4:171904803-171907686	0.722226	1.42482	0.980256	0.950156	1.12019	0.237512	1.00703	1.43205	0.507985	1.65822	1.59675	-0.0544996	1.07388	1.38335	0.365338	0.28975	0
GPR182	chr7:67740513-67743417	2.93529	1.96587	-0.578336	2.36605	1.47648	-0.68032	1.82103	1.92877	0.0829303	2.24285	1.85809	-0.271511	2.36611	1.79853	-0.395698	0.2898	0
WDR44	chrX:9720138-9825726	7.06787	5.82183	-0.279803	6.90169	6.17352	-0.160858	9.03554	7.57306	-0.254734	9.18667	8.70023	-0.0784895	8.00697	6.98543	-0.196906	0.28985	0
HSBP1L1	chr18:77128896-77134655	39.6665	36.1596	-0.133543	59.877	32.9446	-0.86196	24.0639	36.4539	0.599204	49.0341	35.7127	-0.457349	43.664	35.1917	-0.311208	0.2899	0
UAP1L1	chr3:3526395-3531669	4.94843	5.41872	0.130981	5.27525	5.84209	0.147244	4.17291	5.04985	0.275187	3.25948	4.86603	0.578101	4.46194	5.3011	0.248621	0.29	0
GLOD5	chrX:26505714-26520399	1.13303	0.203866	-2.4745	0.820717	0.182059	-2.17248	0.612258	0.825875	0.431784	0.747006	0.817424	0.129966	0.839371	0.48712	-0.785032	0.2901	0
CHRNB4	chr8:58586960-58605545	12.8298	7.90872	-0.69798	11.0472	12.823	0.215052	21.1341	11.156	-0.92175	7.3442	12.7355	0.794179	13.0284	11.0742	-0.234463	0.2904	0
ZFP207	chr10:68613367-68625686	74.331	68.417	-0.11961	81.1734	67.2932	-0.270546	80.8278	74.3843	-0.119852	88.3114	82.3575	-0.1007	81.1656	72.6249	-0.160403	0.2918	0
RHBDD3	chr14:85759529-85765197	11.6948	13.9808	0.257585	12.7033	15.2845	0.26687	13.1695	15.2103	0.207847	13.068	14.1971	0.11956	12.6612	14.6285	0.208371	0.2923	0
ZIC2	chr15:107608818-107613644	3.09158	3.23536	0.0655804	4.14041	2.64744	-0.645176	6.06224	5.80802	-0.0618043	5.01863	10.7282	1.09605	4.53063	5.43281	0.261988	0.2928	0
ALAD	chr5:79505644-79515983	15.1235	18.9812	0.327774	17.8368	19.7944	0.150238	17.8087	23.8152	0.419298	24.1026	24.3577	0.015191	18.6442	21.542	0.208427	0.29305	0
ACER3	chr1:155452405-155556394	5.13537	6.10297	0.249041	4.91045	5.54545	0.175449	5.36708	5.7908	0.109625	5.08552	6.58874	0.373608	5.13069	5.98274	0.221654	0.2933	0
LGALS9	chr10:65129005-65152052	3.47199	6.30053	0.85971	4.05752	6.02547	0.570475	8.89148	6.37613	-0.479741	8.40498	11.3398	0.432074	6.08036	7.41329	0.285957	0.29345	0
FCGR1A	chr2:191095025-191103942	3.92263	1.98319	-0.984001	3.79486	2.89681	-0.389585	7.324	5.56446	-0.396391	3.7837	4.57343	0.273478	4.66209	3.66421	-0.347474	0.29375	0
FKBP11	chr7:137490985-137494418	0.363493	1.76593	2.28043	0.789699	0.876106	0.149804	1.18225	1.59496	0.431986	1.7322	2.10531	0.281428	0.994808	1.56738	0.655869	0.2943	0
BRCA1	chr10:90512725-90572676	1.58556	1.16424	-0.445612	1.36337	1.20221	-0.181488	1.33021	1.391	0.064473	1.81647	1.25274	-0.536052	1.52599	1.24525	-0.293313	0.2944	0
TESC	chr12:39669713-39703667	1.53372	0.690093	-1.15217	0.415733	0.616119	0.567549	0.425927	0.287622	-0.566433	1.04609	0.475377	-1.13787	0.866937	0.524461	-0.725093	0.29455	0
KCNT1	chr3:4050319-4090098	9.56659	8.47794	-0.174291	9.85261	9.37957	-0.0709849	12.6314	10.947	-0.206471	11.5695	9.5645	-0.274564	10.8602	9.52727	-0.188921	0.29465	0
NPEPO	chr17:7353425-7624936	2.33133	2.59983	0.157263	2.80443	1.70394	-0.718832	2.14329	1.50322	-0.511764	2.10807	1.58323	-0.413052	2.36425	1.86298	-0.343768	0.29535	0
REM1	chr3:142976927-142985368	0.78537	0.391552	-1.00417	0.849567	0.582468	-0.54455	0.747771	0.655524	-0.189947	1.23377	0.930765	-0.406585	0.90224	0.62909	-0.520245	0.29555	0
COL23A1	chr10:36808583-37099235	88.4578	86.3353	-0.0350375	113.04	91.2759	-0.308524	122.084	112.028	-0.124013	118.132	108.612	-0.121219	110.099	98.6653	-0.158182	0.2956	0
FRRS1L	chr5:74863585-74896375	15.5705	15.4157	-0.014422	14.5341	11.9361	-0.284111	13.17	11.5947	-0.183792	11.886	9.87572	-0.267308	13.8935	12.2701	-0.179262	0.2957	0
MYH11	chr10:666656-776540	1.85476	2.31338	0.318775	2.0768	2.10386	0.0186781	2.08086	3.10521	0.577512	2.56564	2.66058	0.0524224	2.14012	2.51945	0.23542	0.29585	0
EPB41L4B	chr5:74972596-75059096	3.82148	3.58114	-0.0937109	4.13181	2.5303	-0.707469	3.31512	3.73769	0.173087	2.33123	7.43363	1.67298	3.4384	4.23689	0.301268	0.296	0
OAT	chr1:192026622-192046404	45.7428	52.999	0.212423	53.8891	53.0665	-0.0221937	44.8651	48.54	0.113582	47.9014	61.2656	0.355008	48.307	53.7867	0.155017	0.2962	0
ZFHX2	chr15:33166513-33198613	3.24993	3.41929	0.0732844	3.30482	3.54456	0.101032	3.60479	4.63265	0.361923	3.35789	3.95278	0.235311	3.38099	3.85306	0.188561	0.2962	0
NIP7	chr19:36915151-36917294	8.36435	8.64545	0.0476884	7.20684	10.3189	0.517847	10.1868	11.8864	0.222615	10.6067	13.2348	0.319352	9.04075	10.8998	0.269786	0.29675	0
SLC25A22	chr1:201617688-201625537	72.1713	65.9924	-0.129127	73.2571	70.0907	-0.0637458	121.871	108.682	-0.165234	130.472	114.438	-0.189169	98.1724	88.2663	-0.153455	0.29685	0
GPT	chr7:114746053-114748903	4.73197	4.75081	0.00572978	6.02111	4.66965	-0.366714	10.1673	7.87121	-0.369278	12.3985	10.7911	-0.200329	8.18414	6.8654	-0.253487	0.2975	0
GALNTL6	chr16:34554996-35854145	6.74401	8.17808	0.278156	10.3838	6.12744	-0.76098	5.18226	4.67785	-0.147735	4.51442	3.37649	-0.419013	6.82183	5.67385	-0.265832	0.2977	0
TPD52L1	chr1:26788884-26951930	7.35783	10.9932	0.579265	7.19598	7.51756	0.0630724	8.20429	8.06657	-0.024424	6.30559	8.95883	0.506678	7.28012	8.89107	0.288396	0.29855	0
FAM210B	chr3:163260457-163284506	9.85462	12.5196	0.345314	10.3936	12.1627	0.22676	8.56841	7.64432	-0.164641	7.40141	11.3179	0.612736	9.13382	10.9734	0.264716	0.2993	0
KIAA0922	chr2:175665716-175800041	2.27171	2.03437	-0.159197	2.01068	1.81402	-0.148489	2.79264	2.56996	-0.119882	2.91333	1.9305	-0.593691	2.48333	2.07248	-0.260917	0.29975	0
RPP25	chr8:61248739-61250120	15.6038	12.4022	-0.331297	17.5241	16.6054	-0.0776938	18.7117	16.2097	-0.207084	19.8875	16.8921	-0.235514	17.8963	15.4219	-0.214679	0.30015	0
DHX40	chr10:75043069-75080652	18.1729	15.0755	-0.269581	16.5189	15.6133	-0.0813372	16.4387	13.4407	-0.290487	14.2901	13.8037	-0.049955	16.4481	14.5	-0.181866	0.3004	0
GRAMD3	chr18:52171661-52271700	6.02837	7.66352	0.346238	6.56841	7.26255	0.144933	7.90404	9.54847	0.27268	7.35258	8.21201	0.159484	6.94015	8.10939	0.224627	0.3005	0
TNK1	chr10:56687063-56698602	1.05601	0.595191	-0.827195	0.992835	0.885346	-0.165313	1.68482	1.0394	-0.696848	1.56192	0.81975	-0.930064	1.30981	0.826663	-0.663986	0.30085	0
PCSK5	chr1:221117505-221406377	3.12887	3.47478	0.151277	2.21566	3.5869	0.695001	3.84387	3.47906	-0.143859	2.94531	3.57322	0.278804	3.01941	3.52005	0.221326	0.30105	0
KCNF1	chr6:40910393-40913068	7.81107	9.54409	0.289087	7.74152	8.78075	0.181728	4.29863	4.60682	0.0998956	3.6851	4.82283	0.388176	6.00466	7.05775	0.233127	0.30115	0
RGD1309730	chr3:86659452-86773438	1.33591	2.52412	0.91796	1.63171	3.70286	1.18225	9.29419	11.1898	0.26778	7.75529	8.89055	0.197093	4.81206	6.34901	0.399876	0.30135	0
AATF	chr10:72701732-72794495	10.6619	9.24886	-0.205122	9.55081	8.25487	-0.210379	9.69439	9.04403	-0.100184	10.2577	7.78392	-0.398132	10.0713	8.57371	-0.232264	0.30155	0
LMF1	chr10:14831870-14918122	6.2709	7.54497	0.266844	4.97843	7.4483	0.581218	8.14269	7.74258	-0.0726909	7.37031	9.08481	0.301731	6.64581	7.90898	0.251047	0.30155	0
BAI1	chr7:112622005-112683383	31.2901	29.3384	-0.0929175	33.554	32.0851	-0.0645803	45.1672	38.7658	-0.22049	41.1772	36.5549	-0.171779	37.5694	33.8891	-0.148739	0.30165	0
FCGBP	chr1:83177410-83215268	0.87593	0.669406	-0.387934	0.553707	0.741545	0.421412	0.797287	1.41736	0.830039	0.83336	0.997159	0.258885	0.764521	0.938645	0.296025	0.3021	0
LAMB1	chr6:49115667-49183090	13.6754	13.3191	-0.0380897	11.9242	14.3972	0.271895	15.5887	16.5317	0.0847337	13.5439	17.1746	0.342641	13.6633	15.2269	0.156318	0.30225	0
RGD1303130	chr2:180438069-180441660	17.2368	17.5318	0.0244874	15.9932	18.5596	0.214708	28.6899	32.5296	0.181208	28.2224	35.0874	0.314111	22.2524	25.3879	0.190177	0.3024	0
SEBOX	chr10:64613724-64614596	76.9409	70.7522	-0.120976	79.112	62.1618	-0.347868	124.214	103.466	-0.263674	110.343	108.171	-0.028685	96.7349	84.7571	-0.190702	0.3024	0
FANCG	chr5:59493711-59501854	1.25495	0.638002	-0.975999	1.31654	0.889679	-0.5654	1.2576	1.41819	0.173385	1.40133	1.12282	-0.319663	1.30968	0.998919	-0.39077	0.30265	0
MAFG	chr10:110016493-110024927	33.2518	31.5947	-0.0737516	34.5755	29.4666	-0.23067	24.1386	21.7819	-0.148211	26.0408	21.3435	-0.286979	29.8251	26.2586	-0.183738	0.30305	0
IL7R	chr2:59103991-59128004	1.06396	1.52226	0.516774	0.745738	1.10899	0.572511	1.12408	0.747133	-0.589308	0.473732	1.0588	1.16029	0.856	1.11989	0.387669	0.30335	0
SOX3	chrX:146509688-146511936	0.242901	0.590362	1.28123	0.328449	0.409834	0.319373	1.08554	1.12939	0.0571361	1.03326	1.87084	0.856477	0.651876	0.968042	0.570471	0.30335	0
PHF14	chr4:37147378-37343625	14.4393	15.3165	0.0850834	13.2506	15.0701	0.185632	13.6193	17.6352	0.372807	13.5516	15.1762	0.163351	13.7568	15.7243	0.19285	0.30375	0
SULT5A1	chr19:53472682-53498840	0.10647	1.00677	3.24122	0.43331	0.525426	0.278088	0.707635	1.09619	0.631425	0.760772	0.560511	-0.44072	0.489713	0.793963	0.697137	0.30395	0
ITGB1	chr19:58599740-58647670	26.0635	25.5079	-0.0310904	24.6938	27.6839	0.164897	43.1421	39.6152	-0.123041	27.6377	43.4267	0.651948	30.1412	33.5237	0.153444	0.3042	0
PIK3R6	chr10:55270064-55303503	1.02434	0.663957	-0.625529	0.531519	0.355541	-0.580103	0.767758	0.641276	-0.259707	0.670106	0.446465	-0.585842	0.752333	0.524935	-0.519232	0.3045	0
BST2	chr16:18698547-18701768	1.97926	8.33299	2.07387	3.2268	4.57965	0.505135	7.92532	6.60853	-0.26214	9.66057	9.9508	0.0427054	5.53712	7.30241	0.399236	0.30465	0
RBM4B	chr1:207364031-207374148	31.9707	26.9593	-0.245965	36.7116	30.2749	-0.278114	26.5614	26.6117	0.00272782	31.0447	27.1336	-0.194267	31.8077	27.7264	-0.198113	0.3047	0
STAT3	chr10:89821072-89873043	51.3316	50.3582	-0.0276213	47.8208	52.468	0.1338	96.6981	63.2816	-0.611702	50.0828	54.9817	0.134637	60.8599	54.9005	-0.148674	0.3047	0
HEXA	chr8:63363200-63388153	28.2839	34.2048	0.274219	31.4587	30.7233	-0.0341294	44.5025	47.8033	0.103225	40.6477	51.1284	0.330951	35.935	40.3594	0.167512	0.30485	0
SNTG2	chr6:48059245-48263991	2.98948	2.19981	-0.442514	2.57619	1.92154	-0.422981	2.67306	2.81079	0.0724812	4.09656	3.09847	-0.402857	3.07746	2.47518	-0.314208	0.3051	0
BRWD3	chrX:97008946-97131287	4.06762	3.63708	-0.161404	3.83262	3.21861	-0.251894	3.3131	3.69365	0.156865	4.19639	2.92406	-0.521175	3.86925	3.36427	-0.201762	0.3052	0
CCNL1	chr2:155757335-155769641	25.2479	19.8878	-0.344277	27.3441	21.4488	-0.350334	43.3715	46.267	0.0932374	50.9513	44.6745	-0.189668	36.2343	32.2375	-0.168615	0.30625	0
PTN	chr4:64078754-64161718	98.3049	98.554	0.00365127	112.363	120.574	0.10175	151.307	143.785	-0.0735667	128.644	192.237	0.579498	121.894	136.671	0.165081	0.30635	0
ARSE	chr2:122663036-122670111	7.1661	6.89359	-0.0559326	8.59822	7.46391	-0.204107	11.1931	9.5246	-0.232876	12.3435	9.71211	-0.345897	9.73833	8.30388	-0.229888	0.30645	0
2810403A07RIK	chr2:180807413-180842917	25.4358	23.8573	-0.0924267	28.5684	22.9698	-0.314678	33.8567	31.4191	-0.107801	35.1191	32.9226	-0.0931779	30.6032	27.463	-0.156195	0.3068	0
DUS3L	chrUn:25012654-25017191	20.5693	20.2283	-0.0241197	25.4106	21.6555	-0.2307	25.8473	22.649	-0.190567	28.3849	24.7223	-0.199314	24.9938	22.1759	-0.172575	0.3077	0
CLRN1	chr2:148193632-148243575	1.31922	3.06872	1.21795	3.18792	3.42433	0.103206	9.4472	6.47559	-0.544874	4.13138	10.0234	1.27867	4.38962	5.58376	0.347143	0.3078	0
AKR1CL	chr17:77341132-77367689	0.950415	1.2832	0.433113	0.257192	0.839968	1.70749	1.56557	1.27726	-0.293637	0.799893	1.63114	1.028	0.878237	1.24384	0.502122	0.30795	0
PF4	chr14:18812427-18813396	0.29416	0.31741	0.109748	1.28309	0.567176	-1.17776	7.50871	3.53375	-1.08736	2.66553	2.67228	0.00364985	2.81118	1.68728	-0.736481	0.30815	0
CMKLR1	chr12:44056526-44061043	2.28637	1.64668	-0.473495	1.92206	1.95947	0.0278138	3.33199	2.4481	-0.444724	2.19282	1.75565	-0.320776	2.41848	1.93803	-0.319511	0.3084	0
TSKS	chr1:95417183-95431809	6.77222	5.24191	-0.369535	7.9007	5.44973	-0.535795	9.34496	8.66809	-0.108474	13.1228	12.6582	-0.0520031	9.20245	7.82573	-0.233794	0.3085	0
RASA2	chr8:101613673-101734769	8.68832	6.53358	-0.411203	7.06769	7.1624	0.0192048	8.74588	8.4844	-0.043791	7.67226	5.63061	-0.446361	8.05311	6.9278	-0.21715	0.30855	0
ROCK1	chr18:1390482-1512681	21.4897	17.0365	-0.335019	18.9243	19.7111	0.0587686	31.0395	30.8984	-0.00657428	31.1258	24.9291	-0.320278	25.3994	22.7937	-0.156161	0.3086	0
HMBS	chr8:47314234-47321604	6.13098	7.1803	0.227926	7.12183	8.27558	0.216612	10.2316	10.283	0.00724294	7.88876	11.7568	0.575628	7.78646	9.25081	0.248611	0.30875	0
ACCS	chr3:78252969-78266869	1.20041	0.540316	-1.15166	0.865384	1.06093	0.293914	1.76273	1.20793	-0.545271	1.67009	1.35599	-0.300584	1.3587	1.02348	-0.408743	0.30955	0
ZSCAN18	chr1:73242998-73251441	2.22354	1.55636	-0.514684	2.03062	1.63052	-0.316586	2.44545	2.2902	-0.0946275	2.5215	2.03359	-0.310257	2.301	1.85578	-0.310238	0.31015	0
GIGYF1	chr12:19586307-19597114	21.857	21.4203	-0.0291182	24.6862	20.8519	-0.243525	28.8974	27.8026	-0.0557193	30.1129	24.9698	-0.270197	26.2723	23.5455	-0.158094	0.3103	0
MOB3C	chr5:136088610-136095078	1.45461	1.83266	0.3333	1.0512	2.10363	1.00084	0.972427	1.00338	0.0451999	0.697098	1.08571	0.639202	1.05819	1.53026	0.532181	0.31055	0
ST6GALNAC3	chr2:251284791-251701550	5.6747	8.33609	0.554827	5.38591	5.65093	0.0692971	3.14052	4.97083	0.662485	3.30706	3.57466	0.112257	4.4539	5.70579	0.357359	0.31085	0
STS	chrX:63915802-63923834	10.6824	8.9894	-0.248942	12.0732	9.61284	-0.328777	18.682	16.7481	-0.157645	19.3014	18.5302	-0.0588305	15.0034	13.1855	-0.18633	0.3113	0
PDE6H	chr4:174009849-174014603	65.906	41.7562	-0.658421	62.239	50.8287	-0.292173	64.4747	85.4987	0.40717	96.5331	72.6304	-0.41045	72.0622	61.5189	-0.228214	0.3118	0
SLC26A10	chr7:67120586-67135594	0.875682	1.03203	0.237001	2.53859	1.22806	-1.04765	3.23377	1.86999	-0.790184	2.33143	1.85996	-0.325947	2.21553	1.47139	-0.590465	0.31225	0
NXF1	chr1:211428557-211441798	39.0688	35.325	-0.145326	44.1217	35.2927	-0.322117	64.824	63.2762	-0.0348643	73.4625	66.2659	-0.148741	54.7271	49.0309	-0.158562	0.3125	0
CASP6	chr2:227361502-227373844	1.34316	2.00539	0.578247	1.52946	1.92603	0.332616	1.9351	2.02035	0.062193	1.79642	2.87725	0.679568	1.64226	2.18786	0.413844	0.31255	0
SLC4A3	chr9:74823211-74836192	36.6657	36.9291	0.0103271	41.0481	36.4251	-0.172386	37.6968	32.2702	-0.224242	33.9458	29.3798	-0.208407	37.5007	33.8469	-0.147894	0.3127	0
ABRACL	chr1:13063557-13073748	10.688	6.83733	-0.644487	7.52919	8.20521	0.124045	14.4445	10.0565	-0.522402	11.6862	10.3773	-0.171375	10.9991	8.76431	-0.327668	0.31285	0
CXXC1	chr18:71006695-71011947	19.3872	17.0481	-0.185494	23.2447	19.5558	-0.249309	22.5686	19.8656	-0.184043	21.7779	21.3153	-0.0309732	21.7651	19.3271	-0.171393	0.313	0
CLDN5	chr11_random:1224086-1225513	30.398	35.7363	0.233413	35.1129	36.1918	0.0436646	34.2514	39.632	0.210502	35.9954	42.3017	0.232903	33.9499	38.2224	0.171014	0.31415	0
WDR85	chr3:5110005-5119595	4.57366	4.26467	-0.100914	6.29892	4.96669	-0.342821	7.69188	6.86998	-0.163031	7.30384	5.71125	-0.354849	6.42064	5.38794	-0.252983	0.31415	0
TEKT1	chr10:59219922-59248984	0.221341	0.318802	0.52639	0.552138	0.702715	0.34791	0.958146	1.68434	0.813867	0.738822	0.948246	0.360036	0.605041	0.886118	0.550466	0.31425	0
TMEM98	chr10:69028337-69039246	7.89153	8.9115	0.175364	9.00573	11.482	0.350453	12.3168	11.6118	-0.0850357	9.76342	14.1186	0.532142	9.68697	11.4196	0.23739	0.3145	0
FBN2	chr18:53881447-54014543	2.40116	2.83957	0.241939	3.04314	3.15596	0.0525142	4.21903	4.81809	0.191552	3.5816	5.0697	0.501295	3.28341	3.90214	0.249071	0.31455	0
ZBTB49	chr14:77873450-77895182	6.3152	5.64792	-0.161109	6.3147	5.21163	-0.276982	4.99273	4.17614	-0.257659	6.05637	5.193	-0.221885	5.95848	5.06868	-0.233336	0.315	0
CAPN1	chr1:208620285-208645046	3.88099	3.22782	-0.265863	3.39511	2.83761	-0.258781	5.06926	5.03907	-0.00861768	5.69344	4.2182	-0.432672	4.47266	3.77359	-0.245197	0.3154	0
NFRKB	chr8:31144716-31176261	21.1875	20.9685	-0.0149904	24.4148	19.7312	-0.307282	23.5345	22.9614	-0.0355633	25.3902	22.2067	-0.193274	23.64	21.3497	-0.147015	0.3159	0
OLFM2	chr8:19685432-19746974	31.6468	32.6504	0.0450421	31.6233	38.6938	0.291115	41.1534	41.9357	0.0271658	29.6365	39.1643	0.402161	33.464	37.862	0.178141	0.316	0
GPRIN3	chr4:88375851-88462999	4.2222	3.72296	-0.181544	3.92529	2.60415	-0.59199	1.49369	2.02647	0.440093	1.9355	1.21459	-0.672231	2.96952	2.43444	-0.286643	0.31755	0
GLT1D1	chr12:30025798-30098161	8.59593	6.59176	-0.38299	7.80936	7.90809	0.0181256	6.6167	4.46397	-0.567784	5.17689	4.48642	-0.206522	7.13019	5.93033	-0.265829	0.3184	0
BCAT2	chr1:96038286-96055622	4.56063	4.57942	0.00593044	4.23914	5.88343	0.472889	6.52549	7.60276	0.220436	6.6534	8.6419	0.377257	5.44602	6.57183	0.271093	0.31875	0
NAV2	chr1:98737516-99410078	6.34081	6.72649	0.0851863	5.20505	6.56662	0.335238	7.74945	9.19742	0.247135	7.09926	7.01575	-0.0170717	6.56742	7.31424	0.155382	0.3188	0
SCPEP1	chr10:77347472-77377945	11.486	13.4209	0.224609	10.5943	13.8314	0.384668	23.9441	20.3382	-0.235476	13.8734	20.6605	0.574551	14.7664	16.8137	0.187318	0.3192	0
AQP1	chr4:84098345-84110524	3.72856	4.10339	0.138195	4.93369	4.13246	-0.255668	3.22577	4.95079	0.618016	6.56278	8.97944	0.452319	4.61286	5.44362	0.238904	0.31935	0
MRPL36	chr17:41264-42361	18.0452	12.2909	-0.554025	20.1752	15.7917	-0.353414	29.8257	27.967	-0.0928312	30.4856	29.4698	-0.0488883	24.3753	20.8801	-0.223295	0.31955	0
VSTM2A	chr14:97074480-97102820	14.3361	13.7612	-0.0590501	14.7535	13.0389	-0.178239	18.1523	15.2688	-0.249573	16.751	15.3381	-0.127131	15.95	14.261	-0.161478	0.31955	0
HSD17B7	chr13:85771543-85796008	2.79791	3.51581	0.329511	3.02627	1.92684	-0.651299	3.14608	2.30505	-0.448759	3.60253	2.20316	-0.709438	3.13812	2.49836	-0.328918	0.3197	0
VPS13C	chr8:72196233-72365797	14.3691	12.7018	-0.17793	11.724	12.0017	0.0337768	13.7161	14.7869	0.108449	14.0239	9.34587	-0.585489	13.4708	12.1876	-0.144424	0.3204	0
PRKAB2	chr2:192498035-192512919	10.8453	9.00351	-0.268512	11.0566	8.7443	-0.338496	6.23809	6.16439	-0.0171451	6.6165	5.79548	-0.19114	8.83917	7.49691	-0.237616	0.3207	0
PLA2G5	chr5:157619702-157640971	33.1041	35.5298	0.102017	36.7254	39.2272	0.0950772	31.3489	38.5782	0.299368	39.0529	44.6279	0.192517	35.1439	39.2649	0.159968	0.3212	0
ACTN2	chr17:68705147-68773260	1.71977	1.4278	-0.268418	2.42259	1.83574	-0.400192	2.22734	2.41551	0.117004	4.06956	2.93207	-0.472955	2.58819	2.11563	-0.290854	0.32135	0
DGKZ	chr3:76312720-76354672	39.5941	39.5972	0.000115195	46.2116	42.0914	-0.134727	56.7807	51.2935	-0.146624	56.8264	48.1687	-0.238466	49.5669	44.9057	-0.142481	0.3215	0
CELF5	chr7:9709874-9735811	11.8807	10.765	-0.142274	11.9497	11.4549	-0.0610113	17.5104	15.696	-0.157819	16.8307	14.3969	-0.225339	14.4262	12.9263	-0.158379	0.32165	0
EXOC6	chr1:241964046-242008416	10.8186	10.888	0.00921379	11.155	7.24812	-0.622009	24.4345	17.0176	-0.52189	20.5165	20.0299	-0.0346322	16.4352	13.4839	-0.285545	0.32185	0
RPL30	chr7:69886755-69889664	29.7648	45.1441	0.60093	44.6181	16.7615	-1.41248	80.1228	118.175	0.560644	82.5088	117.106	0.505197	58.1287	71.5446	0.299594	0.3221	0
RPO1-3	chr12:8421462-8454852	12.821	19.822	0.628594	16.7549	15.732	-0.0908794	24.176	28.4998	0.237375	23.6104	27.387	0.214068	19.1208	22.5043	0.235056	0.32215	0
PNMA3	chrX:159058219-159062387	8.85933	8.57008	-0.0478895	9.73389	8.47618	-0.199602	11.2535	10.2039	-0.141255	11.6952	9.2614	-0.33662	10.3479	9.0693	-0.190269	0.32225	0
COL20A1	chr3:170105595-170136774	0.573955	0.551202	-0.0583579	1.46972	0.901809	-0.704648	1.74239	1.3608	-0.356613	1.61082	1.53832	-0.0664338	1.33232	1.06308	-0.325691	0.3226	0
5330417C22RIK	chr2:204019287-204109329	6.58026	4.98355	-0.400971	5.65987	5.06885	-0.159111	5.14261	4.19526	-0.29374	4.5043	4.60538	0.0320167	5.52155	4.72092	-0.226007	0.3234	0
CTDSPL2	chr3:108742476-108799265	18.5374	16.5552	-0.163154	19.5976	15.4711	-0.341098	17.5259	17.2219	-0.0252486	18.5579	17.1513	-0.113719	18.6287	16.5264	-0.172753	0.32345	0
TBC1D17	chr1:95313420-95321644	37.6192	37.6363	0.000655907	43.9581	35.9355	-0.29072	45.0176	42.5424	-0.0815876	47.7543	41.7684	-0.19322	43.5286	39.2163	-0.150508	0.32425	0
PREX2	chr5:7404474-7661400	12.9544	12.1818	-0.088713	12.3387	10.9244	-0.17564	8.27197	8.67506	0.0686422	8.32369	5.52414	-0.591474	10.6218	9.43948	-0.170248	0.32435	0
GALNT4	chr7:36684515-36687053	9.72809	8.3998	-0.211801	11.5308	8.82147	-0.386403	7.37045	8.16997	0.148577	11.0824	9.70745	-0.191111	9.9967	8.74366	-0.193215	0.3246	0
NFXL1	chr14:38054860-38095843	7.19997	6.76072	-0.0908123	8.43142	7.26802	-0.214213	10.4289	10.8108	0.0518835	13.5496	10.3224	-0.39248	9.81189	8.66109	-0.179982	0.3246	0
SNAI1	chr3:158676979-158681468	0.617278	1.06685	0.789372	0.667765	0.595143	-0.166104	1.90893	1.76901	-0.109819	1.25964	2.61349	1.05296	1.08782	1.46745	0.431863	0.3247	0
RGD1565512	chr3:4451178-4473859	6.29969	4.84808	-0.377867	6.86941	5.71332	-0.265857	3.65452	5.57145	0.608373	6.01098	3.76343	-0.675554	5.77617	4.97868	-0.21435	0.32495	0
SLC9A7	chrX:13633104-13808939	21.4699	22.8759	0.0915163	20.5444	16.2312	-0.339974	13.7415	11.7757	-0.222721	10.0174	6.98763	-0.519631	16.7358	14.7492	-0.182301	0.325	0
KAT3	chr2:240842935-240857331	1.60253	1.72897	0.109564	1.04946	0.926956	-0.179077	4.31659	3.30042	-0.387241	4.72832	1.73569	-1.44582	2.84169	1.88313	-0.593615	0.3253	0
IL15	chr19:27487267-27498973	0.729001	1.5727	1.10926	0.398443	1.05419	1.40369	3.06505	3.68003	0.263807	1.3141	2.4164	0.878788	1.33045	2.12353	0.674553	0.3254	0
S100A16	chr2:182807563-182813276	34.6767	36.857	0.0879732	31.6295	37.6646	0.251941	77.73	80.4585	0.0497736	58.8933	75.1393	0.351464	49.8167	56.1636	0.173007	0.32625	0
HS1BP3	chr6:31872269-31902537	3.51987	4.30196	0.289471	3.57378	4.21641	0.238561	4.87344	5.27277	0.11362	3.68437	4.88447	0.406785	3.89879	4.63296	0.248907	0.32635	0
ACP6	chr2:191942044-191964328	3.84385	4.23655	0.140336	5.09465	2.7984	-0.864379	7.59544	5.24296	-0.534753	6.473	6.52474	0.0114859	5.68838	4.62063	-0.299929	0.327	0
EMP2	chr10:5311156-5348038	0.889559	1.05405	0.244785	1.02324	1.16201	0.183472	2.20345	1.60415	-0.457957	2.26426	1.21399	-0.899282	1.56248	1.24613	-0.326385	0.32705	0
CCNL2	chr5:172666465-172677954	49.6044	46.2505	-0.101001	59.6678	47.4991	-0.329054	71.5443	66.5252	-0.104935	80.4754	66.3777	-0.27785	64.8743	55.9338	-0.213927	0.3271	0
CCDC53	chr7:24894879-24942581	13.0451	18.2119	0.481376	13.674	14.3154	0.06614	14.2792	14.6312	0.035131	14.853	18.5884	0.32365	13.9619	16.3946	0.23172	0.32775	0
RGD1311723	chr8:12107085-12154885	3.25455	2.82588	-0.203756	3.62975	2.63584	-0.461607	4.02269	4.71756	0.229881	4.40586	3.22799	-0.448785	3.81559	3.30602	-0.206813	0.3278	0
RGD1562310	chr12:39441307-39461715	13.7662	12.5361	-0.135042	13.2431	11.049	-0.261327	9.95218	10.3187	0.0521709	10.7644	8.26797	-0.380668	12.0517	10.5949	-0.185878	0.32835	0
CEP85	chr5:152879767-152928131	16.0951	14.1722	-0.18356	17.6386	16.0812	-0.133365	19.9779	21.3373	0.0949733	25.1998	19.9357	-0.338059	19.6204	17.6687	-0.151154	0.3295	0
RHOD	chr1:207000009-207013945	0.672816	0.363379	-0.888737	0.363992	1.0379	1.51169	0.876219	1.50715	0.782457	1.36851	1.70419	0.31648	0.806544	1.12204	0.476303	0.3298	0
CXCL14	chr17:14286746-14295500	30.9271	27.2962	-0.18017	30.1257	29.0908	-0.0504332	43.521	39.61	-0.13585	49.2995	42.0738	-0.228652	38.1201	34.0508	-0.162862	0.32985	0
CD74	chr18:56756510-56765711	165.815	138.82	-0.256357	142.395	154.285	0.115699	208.71	199.94	-0.061931	76.1185	169.889	1.15828	148.703	164.142	0.142511	0.3299	0
TCN2	chr14:84579159-84594188	19.0133	18.0427	-0.0755973	19.8679	23.2549	0.227098	32.1308	36.3842	0.179354	34.6052	41.8997	0.27595	26.0742	29.2586	0.166239	0.33005	0
ATOH8	chr4:105499941-105532118	0.77911	1.80962	1.21579	1.05272	1.72771	0.714741	1.35305	1.37319	0.0213148	2.21575	1.9122	-0.212564	1.33003	1.70573	0.358928	0.3303	0
ANPEP	chr1:135600750-135619208	0.215223	0.494109	1.19899	0.145343	0.492833	1.76164	1.22175	1.14487	-0.0937659	1.44787	1.85656	0.358698	0.727018	0.964523	0.407825	0.3306	0
LDLRAP1	chr5:153504534-153527523	3.30922	2.98909	-0.146784	4.57212	3.45212	-0.405381	3.08871	2.50073	-0.304656	2.58964	2.48843	-0.0575126	3.42665	2.87196	-0.254761	0.3309	0
POLK	chr2:26952024-27012088	4.61314	3.8261	-0.269875	4.75734	4.69489	-0.0190648	5.0223	4.50658	-0.156315	5.45209	4.22875	-0.366579	4.95796	4.29904	-0.205731	0.331	0
ZFP12	chr12:11677488-11690970	0.90154	0.717617	-0.329178	0.923495	0.457483	-1.01339	0.984864	0.666221	-0.563924	0.691667	0.736074	0.0897726	0.878953	0.63981	-0.458142	0.33135	0
ADAMTS4	chr13:87142280-87151783	0.628965	0.88294	0.489335	0.911346	1.32504	0.539966	3.57965	3.23047	-0.148073	1.76118	3.15536	0.841261	1.66614	2.07944	0.319683	0.33145	0
CROCC	chr5:159875183-159917880	94.8666	86.1099	-0.139721	109.701	92.712	-0.242753	59.6584	71.895	0.269166	86.6142	69.0059	-0.327885	88.7842	80.3011	-0.144883	0.33155	0
MDK	chr3:76301987-76312166	30.4146	30.3579	-0.00269141	30.0514	33.2396	0.145471	66.2867	69.3063	0.0642668	35.5511	72.8984	1.03599	40.0202	50.1362	0.325122	0.33165	0
KCTD21	chr1:154573144-154590363	8.50852	5.35175	-0.668898	9.39355	9.24209	-0.0234507	6.17515	4.65892	-0.406478	5.1876	4.11145	-0.335418	7.42317	5.90852	-0.32924	0.33185	0
SLAMF8	chr13:88586511-88596072	1.2924	1.52902	0.242546	1.06522	1.36473	0.357467	1.01514	1.00112	-0.020058	0.68034	1.61094	1.24357	1.02472	1.3779	0.427239	0.33185	0
WDR59	chr19:41369904-41441791	13.3489	10.8591	-0.297817	14.9635	12.1606	-0.299227	8.6788	10.0217	0.207565	12.2725	10.978	-0.160809	12.4552	11.0074	-0.178279	0.3321	0
LETM2	chr16:70844078-70865537	11.959	11.9484	-0.00127612	18.8107	13.0761	-0.524627	26.6312	27.108	0.0256004	30.287	25.9122	-0.225068	21.6001	19.0391	-0.18207	0.3324	0
ADARB2	chr17:72678282-73238156	9.35851	7.36482	-0.345628	7.34882	6.35531	-0.209549	5.4647	5.68072	0.0559309	4.10646	3.42462	-0.261952	6.68674	5.76322	-0.214427	0.33285	0
IAH1	chr6:41875019-41882237	33.1259	40.4142	0.286903	31.2543	32.303	0.0476113	47.1359	54.1906	0.201216	43.6006	49.8827	0.194192	38.491	43.6292	0.180772	0.3331	0
IQCE	chr12:14414009-14453173	4.39851	3.79718	-0.212086	4.47881	3.6727	-0.286275	4.32032	3.89238	-0.150483	4.47318	4.0231	-0.152996	4.42958	3.83065	-0.209584	0.3331	0
OSTF1	chr1:222182338-222229893	18.4557	25.889	0.488276	16.7164	20.4629	0.291748	30.9099	25.6376	-0.269809	19.181	25.2953	0.399193	21.1321	24.2022	0.195706	0.3331	0
ZFP217	chr3:161150457-161161178	3.80481	3.277	-0.21545	2.93236	4.59195	0.647043	3.03052	3.18764	0.0729236	1.5939	2.54596	0.675648	2.87542	3.42246	0.251259	0.3332	0
ITGB1BP1	chr6:41830110-41844514	10.9719	11.3503	0.0489131	11.3739	11.3979	0.00304263	19.7151	23.2818	0.239903	18.3591	24.4247	0.411846	14.9135	17.1946	0.205338	0.33375	0
TRIM46	chr2:181404400-181417096	6.54031	5.02015	-0.381629	5.9067	5.73103	-0.0435576	8.77552	6.91465	-0.343828	6.95353	6.52969	-0.0907299	7.01108	5.99244	-0.226493	0.3338	0
ACTC1	chr3:99901021-99906558	3.49008	2.31993	-0.589175	2.61431	3.10608	0.248663	4.14067	3.1627	-0.388707	6.08693	4.63681	-0.39258	4.03911	3.26189	-0.308327	0.33395	0
HSPA2	chr6:99000540-99003041	17.8663	15.6476	-0.191296	18.3177	18.0056	-0.0247931	34.9457	21.1024	-0.727708	15.3857	22.6833	0.560046	21.438	19.1571	-0.162287	0.33395	0
CARHSP1	chr10:6986582-7000181	10.8407	9.4978	-0.190788	11.4577	13.1152	0.194922	25.8416	14.5381	-0.829853	11.2989	15.4421	0.450678	14.653	13.0001	-0.172671	0.33405	0
ROBO3	chr8:38668912-38683439	1.03229	0.902097	-0.194496	1.62322	1.12702	-0.526346	1.51459	1.55241	0.0355848	2.41529	1.96475	-0.297852	1.63318	1.36056	-0.263484	0.3348	0
RGD1308117	chr15:50555248-50559887	0.882075	0.688187	-0.358101	1.27174	0.755955	-0.75043	1.21966	1.18406	-0.0427379	1.55329	1.06339	-0.546653	1.22597	0.908398	-0.432525	0.335	0
DGKH	chr15:59730291-59883806	5.47936	4.62564	-0.244353	4.64137	3.39908	-0.449406	2.28923	3.15831	0.464287	2.41108	1.05978	-1.18592	3.79281	3.1121	-0.285379	0.3351	0
MAST1	chr19:24872676-24900537	35.4674	33.4557	-0.0842448	37.4094	32.6621	-0.195781	38.5608	36.1311	-0.0938954	42.4537	38.4933	-0.141281	38.4536	34.9749	-0.136799	0.3351	0
PAQR4	chr10:12982318-12997295	20.4151	22.618	0.147836	24.4868	25.7254	0.0711899	22.5661	26.0343	0.206255	26.7459	32.1109	0.263744	23.5497	26.4076	0.165241	0.3352	0
ODZ3	chr16:46648770-47149524	17.2447	16.8985	-0.0292552	13.3063	17.7741	0.417661	20.4437	23.0943	0.175884	19.9714	20.5574	0.0417212	17.6473	19.3962	0.136324	0.33535	0
LHFPL1	chrX:33160887-33220843	1.84252	0.663309	-1.47393	0.665336	0.690832	0.0542525	0.552209	0.62183	0.171306	0.680042	0.54002	-0.33261	0.95722	0.630326	-0.602753	0.3355	0
TRAM2	chr9:19760430-19838568	0.619883	1.3391	1.1112	0.335473	0.896477	1.41807	0.898581	0.714646	-0.33042	0.783345	0.828194	0.0803214	0.650675	0.953556	0.551381	0.33605	0
KCNB2	chr5:2683949-3155155	7.95277	6.74035	-0.238632	6.57013	6.12893	-0.100286	4.57169	4.85586	0.0869983	4.38474	2.52207	-0.797881	5.96446	5.1328	-0.216645	0.33625	0
CPE	chr16:26748591-26748988	1106.65	908.061	-0.285337	733.489	776.417	0.082056	230.029	281.372	0.290665	542.592	391.319	-0.471523	671.073	603.423	-0.1533	0.3366	0
TAX1BP3	chr10:60053937-60058595	9.81214	10.2127	0.0577289	7.32086	10.9761	0.584276	14.6181	12.2451	-0.255546	9.28545	14.7275	0.665474	10.1797	11.9239	0.228156	0.33665	0
GSTT1	chr20:13604354-13621456	2.3996	2.07309	-0.211013	1.82075	3.00756	0.724061	3.04964	4.87826	0.677728	3.74824	4.65964	0.314005	2.72658	3.57697	0.391646	0.3369	0
RGD1562234	chr2:183499182-183502085	1.98988	1.71686	-0.21291	1.74215	0.383665	-2.18295	0.471204	0.527763	0.163537	1.69247	0.77907	-1.1193	1.50259	0.863999	-0.798348	0.33695	0
RGD1566099	chr13:52164822-52170015	3.90355	3.6397	-0.100968	5.39593	2.56596	-1.07237	11.9111	8.19128	-0.540146	9.18185	9.78386	0.0916189	7.44063	5.85513	-0.345722	0.33715	0
CCDC89	chr1:147091687-147092950	4.44373	3.02202	-0.55626	5.25601	4.68105	-0.167134	2.52047	2.90257	0.203639	4.56285	2.75741	-0.726622	4.2461	3.36097	-0.33726	0.3376	0
BCL2A1	chr8:94045108-94053777	0.755356	0.815462	0.110461	1.43626	1.45647	0.0201643	6.12258	2.33998	-1.38764	2.24102	2.86099	0.352358	2.54831	1.81866	-0.486666	0.33785	0
ISOC1	chr18:54471689-54492099	21.313	24.8716	0.222764	21.2709	22.7974	0.0999862	23.4135	25.4479	0.120202	21.1575	24.047	0.184688	21.8076	24.208	0.150657	0.33795	0
LAD1	chr13:48850259-48864622	1.26772	1.32387	0.0625189	1.59891	2.2001	0.460475	3.16534	4.49445	0.505785	3.01673	3.22099	0.0945155	2.21959	2.73793	0.302792	0.33815	0
PCDHB4	chr18:30117015-30119555	7.26256	6.71394	-0.113318	6.52187	5.60873	-0.217611	5.30315	4.53495	-0.225761	5.08418	3.9473	-0.365149	6.10617	5.24837	-0.2184	0.33815	0
NFE2L2	chr3:58366692-58394256	12.2341	15.2629	0.319118	14.9554	16.8197	0.169483	19.2116	20.012	0.0588823	16.8251	19.4078	0.206022	15.7097	17.7193	0.173664	0.33845	0
OGFRL1	chr9:22230655-22247453	31.5533	32.518	0.0434484	29.1077	25.7497	-0.176844	37.0499	28.0567	-0.401126	24.9157	22.2826	-0.161139	30.6891	27.2151	-0.173322	0.33865	0
CD320	chr7:16338135-16343892	12.936	16.1516	0.320279	13.2137	15.1256	0.194962	13.5533	14.4252	0.0899507	12.2648	14.8783	0.278682	13.0245	15.1406	0.217192	0.3388	0
MMEL1	chr5:171675006-171703353	6.93932	6.38106	-0.120999	6.83659	5.72588	-0.255778	9.73918	7.7624	-0.327298	8.93654	8.55565	-0.0628377	8.06086	7.02693	-0.198041	0.33895	0
PKM	chr8:63486281-63508256	520.162	623.022	0.260321	696.264	478.563	-0.540926	601.395	520.983	-0.207077	613.48	565.036	-0.118673	609.083	546.072	-0.157547	0.33925	0
VWA5B2	chr11:82535427-82552800	7.70718	8.09645	0.0710864	9.81053	7.74777	-0.340549	10.2904	9.44971	-0.122962	9.36966	7.92776	-0.241084	9.28133	8.26237	-0.167776	0.33925	0
CHST11	chr7:22718338-22950085	10.1745	12.4493	0.291107	10.0855	11.4405	0.181859	6.98494	7.7309	0.146388	5.40796	7.98205	0.561674	8.29172	10.0024	0.270598	0.33935	0
TBC1D16	chrUn:51968434-52054940	5.65417	4.73972	-0.254512	5.59522	5.47838	-0.0304465	3.5051	3.00476	-0.222206	3.16774	2.5405	-0.318344	4.55574	4.0007	-0.187436	0.3398	0
ING3	chr4:48255444-48281126	9.72547	10.2718	0.078853	11.7347	8.91633	-0.396262	15.3793	14.083	-0.12704	15.8228	13.2631	-0.254586	13.0564	11.4843	-0.185092	0.3401	0
PLXND1	chr4:152080258-152120237	4.4394	5.73434	0.369264	5.08553	5.24877	0.0455802	4.46927	4.60255	0.0423928	3.83323	4.61498	0.267765	4.48268	5.06546	0.176333	0.3405	0
SLC16A8	chr7:117234092-117237887	0.945741	0.681089	-0.473602	0.852309	0.709202	-0.26518	1.34177	0.981136	-0.451614	1.617	1.17865	-0.456186	1.17618	0.873793	-0.42875	0.3405	0
RGD1307315	chr6:137809372-137816169	7.10933	9.19037	0.37041	10.7154	9.60741	-0.15747	10.9505	14.468	0.401863	14.1995	16.6729	0.231666	10.6668	12.2684	0.20182	0.34115	0
KIF26B	chr13:94184946-94606719	1.66617	1.5395	-0.114081	1.24093	1.08574	-0.192738	1.10804	1.49668	0.433748	0.7148	1.61737	1.17804	1.20048	1.42476	0.247105	0.34145	0
NR2F6	chr16:18535180-18543093	15.0743	17.5691	0.220958	17.3737	19.0535	0.133155	15.7245	18.9232	0.267142	18.3519	20.3531	0.149316	16.6498	18.8874	0.181922	0.34145	0
VEGFB	chr1:209655764-209661271	16.0636	18.1169	0.173544	16.283	20.0947	0.303447	25.3419	27.8736	0.137375	22.2191	25.3824	0.192026	19.8009	22.5808	0.18953	0.34155	0
GLMN	chr14:2664859-2789190	17.1689	17.1085	-0.00508315	21.4439	16.2782	-0.397623	25.6643	25.0768	-0.0334132	33.5193	27.8494	-0.267345	24.2246	21.2336	-0.190126	0.3416	0
NCF4	chr7:116167620-116190630	0.871214	0.513279	-0.763284	0.342922	0.992689	1.53346	0.917745	1.15561	0.332491	0.733235	1.4499	0.983607	0.712073	1.00814	0.501601	0.34165	0
RPL18A	chr16:19042062-19044069	196.917	226.127	0.199549	204.858	226.738	0.146398	384.296	422.928	0.138194	386.14	425.257	0.139211	288.491	318.509	0.142808	0.3422	0
MSL3	chrX:46330789-46348466	13.0345	10.3142	-0.337697	12.3856	12.3671	-0.00215386	21.1977	19.1282	-0.148204	22.3965	19.7673	-0.180155	17.039	15.1093	-0.173401	0.3423	0
TSPAN12	chr4:48084835-48164956	13.6278	15.4254	0.178757	14.0262	17.4609	0.316003	21.4983	18.0342	-0.253488	13.9797	19.8014	0.50227	15.6931	17.5608	0.16223	0.3426	0
MTMR10	chr1:118726104-118777543	7.09804	7.40508	0.0610937	6.0243	8.18339	0.441904	7.29656	8.24661	0.176586	7.87867	8.04584	0.0302905	7.06454	7.93922	0.1684	0.3429	0
SLITRK2	chrX:152668555-152671996	39.3269	46.1959	0.232249	38.2914	44.7735	0.225627	50.9423	52.8267	0.0524011	39.3701	41.3094	0.0693687	41.8791	46.1158	0.139032	0.34315	0
LRRC55	chr3:68414796-68427502	2.27156	3.21935	0.503087	2.8202	3.332	0.240591	3.64297	3.1109	-0.227785	2.0418	3.5639	0.803619	2.68809	3.29675	0.294461	0.3432	0
COLEC11	chr6:46466455-46502225	0.621053	0.50311	-0.303842	0.336108	0.673627	1.00302	0.741354	0.954592	0.364721	0.588567	1.24454	1.08033	0.567879	0.826332	0.541136	0.34335	0
LRRC15	chr11:72377089-72378826	12.8947	9.8892	-0.382858	9.05623	12.6477	0.48189	20.3114	10.7539	-0.917427	6.668	8.87974	0.413264	12.1671	10.5562	-0.204885	0.3437	0
DDX56	chr14:86984621-86994552	11.7942	9.64055	-0.29089	12.3328	10.3049	-0.259174	12.0177	11.0101	-0.126326	12.4838	11.9105	-0.0678227	12.1809	10.6451	-0.194436	0.3439	0
LRRC48	chr10:46614081-46662672	1.52857	2.16369	0.501306	1.53908	2.54098	0.723316	1.78249	2.37848	0.416142	2.83853	2.56849	-0.144227	1.90676	2.40295	0.33368	0.34415	0
F2R	chr2:25985799-25989072	2.32322	2.48041	0.0944535	2.33308	2.39806	0.0396307	3.07382	3.10102	0.0127084	2.53794	4.41433	0.798535	2.55839	3.0518	0.254425	0.34425	0
RAB23	chr9:32465247-32488547	20.4789	18.6378	-0.135906	19.6869	17.7247	-0.151477	19.818	19.3124	-0.037282	21.3513	17.4303	-0.292731	20.3719	18.2276	-0.16046	0.34435	0
TAOK2	chr1:186045137-186064327	45.3876	41.7473	-0.120616	49.4081	42.4821	-0.217893	45.0698	43.2769	-0.0585639	45.6716	42.7489	-0.0954099	46.548	42.4335	-0.133518	0.34445	0
ECHS1	chr1:199901584-199934938	17.7749	23.0546	0.375216	23.7631	26.5994	0.162673	31.6381	32.1036	0.0210725	26.4433	32.6888	0.305892	24.7098	28.3089	0.196175	0.3445	0
CCNT1	chr7:137284132-137314974	12.7722	10.9786	-0.218319	12.3139	11.3099	-0.122698	9.86389	9.67705	-0.0275887	11.1447	8.5909	-0.37547	11.6123	10.1747	-0.190669	0.3447	0
PMP22	chr10:49305834-49335864	20.3316	21.7344	0.096251	19.1822	23.176	0.272867	48.5214	36.6575	-0.404515	27.1064	47.9093	0.821674	28.297	31.6943	0.163576	0.3449	0
FAM89B	chr1:208355216-208356792	32.0323	38.7225	0.273643	31.956	37.4949	0.230609	44.5469	45.4831	0.0300033	43.3595	48.5945	0.164445	37.7211	42.2048	0.162037	0.34495	0
NETO1	chr18:82888368-83107662	13.2447	12.7012	-0.0604465	12.9472	10.9457	-0.242281	10.5311	10.7251	0.0263243	10.6536	8.03945	-0.406167	11.9442	10.6531	-0.165039	0.34495	0
ITPR3	chr20:5292429-5357502	1.4934	1.28044	-0.221966	1.51902	1.30054	-0.22404	1.6969	1.58545	-0.0980065	1.03102	2.65398	1.36408	1.44114	1.67631	0.218078	0.345	0
CENPM	chr7:120607097-120619299	1.21445	0.319769	-1.9252	1.46343	1.49808	0.0337663	1.52397	1.31363	-0.214273	1.43	0.800119	-0.837731	1.40685	0.974057	-0.530389	0.34545	0
MYL9	chr3:147187543-147193865	4.04288	5.10484	0.336481	4.61455	5.06117	0.133282	10.2367	12.7816	0.320315	12.0712	14.939	0.307512	7.56838	9.18438	0.279198	0.34555	0
LOC365985	chr2_random:4241929-4291270	4.14631	3.31563	-0.322545	4.19304	3.8938	-0.106816	6.53721	5.23382	-0.320813	6.16379	5.20315	-0.244432	5.20963	4.35134	-0.25972	0.3456	0
MTHFD2	chr4:117517610-117529128	4.39297	5.19054	0.240688	5.73919	6.44145	0.166539	4.02404	6.14461	0.610676	4.90963	4.97353	0.0186559	4.79488	5.67929	0.244215	0.3457	0
RGD1304587	chr10:45512639-45515066	9.46062	14.1825	0.584105	8.74048	10.0649	0.203546	13.1605	14.2634	0.1161	16.5882	17.0244	0.0374466	11.8594	13.7517	0.213575	0.34575	0
PTPRC	chr13:51246162-51357995	3.50267	2.69153	-0.380029	2.75169	2.6728	-0.0419635	5.42599	3.40904	-0.670522	2.40186	3.46707	0.529563	3.50128	3.02999	-0.208569	0.3462	0
PIP5K1B	chr1:227689732-227961671	9.63208	10.1534	0.0760435	9.13778	11.2755	0.303276	10.5217	11.5246	0.131355	8.64628	11.8413	0.453676	9.49812	11.141	0.230167	0.34635	0
FADS3	chr1:212489125-212508072	7.18805	7.28628	0.0195828	7.45935	8.17436	0.132056	8.89273	10.4073	0.226894	7.37858	10.8483	0.556048	7.72161	9.06825	0.231922	0.34675	0
VAT1L	chr19:44252314-44445140	90.0791	93.8932	0.0598286	85.293	100.571	0.23772	90.0657	93.4307	0.0529201	62.9074	74.2644	0.239439	82.5506	90.7103	0.135988	0.3471	0
OLFML3	chr2:198958479-198961309	21.3544	24.1973	0.180316	22.0838	25.4175	0.202837	21.1717	22.4969	0.0875936	21.7053	25.0003	0.203901	21.6381	24.2509	0.164467	0.34715	0
MFSD2A	chr5:142260559-142275435	2.57658	2.02862	-0.344959	1.55804	2.86315	0.877868	2.05827	3.17398	0.62486	2.77724	3.08863	0.153312	2.24068	2.75985	0.300651	0.3473	0
NAPB	chr3:137428307-137490557	239.929	219.806	-0.126371	219.974	193.693	-0.183564	121.563	121.992	0.00508771	130.449	106.522	-0.292341	181.406	162.95	-0.154789	0.34795	0
TFPI2	chr4:28807079-28811502	0.949209	0.410072	-1.21085	0.822413	0.640612	-0.360412	1.54149	1.22975	-0.325964	1.58327	1.14901	-0.462517	1.20798	0.834843	-0.533023	0.34805	0
LOC499602	chr2:127780794-127874232	6.38518	4.81248	-0.407948	5.4972	4.59908	-0.257352	6.84308	6.01665	-0.185686	7.69609	6.26451	-0.296923	6.58614	5.36726	-0.295247	0.34815	0
IFI47	chr10:34197629-34205260	2.75795	3.08963	0.163838	2.48536	4.08708	0.717615	9.38325	3.8972	-1.26765	3.62707	3.71659	0.0351777	4.45218	3.68053	-0.274597	0.3482	0
HIST1H1B	chr17:50360615-50361284	1.21683	0.875716	-0.474595	4.18874	1.7597	-1.25118	2.87532	1.90936	-0.590634	0.796168	1.74371	1.13102	2.29117	1.55152	-0.562403	0.3483	0
LIME1	chr3:170522419-170524743	5.46837	5.25088	-0.0585518	7.33697	6.34629	-0.20927	9.86398	9.42455	-0.0657465	10.5736	7.6453	-0.467818	8.22075	7.06451	-0.21868	0.3484	0
SPATA20	chr10:83117657-83124501	2.84816	2.72641	-0.0630288	2.41596	3.02414	0.323931	6.32163	3.53529	-0.838469	2.92568	2.75715	-0.0855903	3.57338	2.9946	-0.254927	0.34855	0
KPTN	chr1:76460094-76467772	29.8884	23.2751	-0.360801	31.8912	30.4796	-0.0653146	35.2017	24.8088	-0.504795	31.0056	28.1861	-0.137544	31.9983	26.6239	-0.265277	0.34885	0
LMNB1	chr18:52470263-52508697	20.4895	17.1606	-0.255784	22.7168	18.5503	-0.292316	16.7609	18.0415	0.106225	22.197	19.9456	-0.154296	20.6585	18.3445	-0.171386	0.34885	0
NCALD	chr7:72875313-72976373	45.1728	44.0286	-0.0370127	42.2214	43.7374	0.0508943	79.1501	56.9796	-0.474145	51.6158	53.2587	0.0452036	53.9992	49.0421	-0.138916	0.3491	0
ENOX2	chrX:135484264-135809859	1.53983	0.92967	-0.727977	1.1498	1.3318	0.212	0.792663	1.44857	0.869849	0.630613	1.53067	1.27934	1.04888	1.29559	0.304762	0.34935	0
TSC22D4	chr12:19813445-19834821	18.4429	17.0212	-0.11573	16.3257	22.559	0.466559	31.9628	32.1815	0.00983976	28.1968	34.7063	0.299667	23.4218	26.1328	0.158008	0.3495	0
PSD	chr1:251527889-251543344	52.3992	44.0046	-0.251892	61.36	52.7907	-0.217016	55.0267	61.7115	0.165408	80.4686	71.0334	-0.179929	62.1923	56.6939	-0.133543	0.34975	0
SRCRB4D	chr12:21818235-21833937	1.5378	2.34098	0.606241	2.22866	2.42619	0.122518	1.55679	2.44148	0.649183	2.20403	2.01945	-0.126181	1.88678	2.30585	0.289367	0.34985	0
ACSS2	chr3:146013994-146057119	23.3164	20.6503	-0.175187	23.2855	22.9985	-0.0178915	29.4025	26.2061	-0.166037	28.5512	24.9362	-0.195308	26.0375	23.5236	-0.146482	0.3504	0
KCNH6	chr10:95400861-95421678	21.8135	20.1187	-0.116686	23.8826	20.2687	-0.236706	25.3641	23.5991	-0.104056	29.3619	27.3942	-0.100079	25.042	22.6313	-0.146025	0.3507	0
RGD1305713	chr1:137997574-138004006	5.65778	6.4745	0.194532	7.20638	6.3795	-0.175831	5.43913	6.76783	0.315319	4.76772	7.73344	0.69781	5.81586	6.79806	0.22513	0.3507	0
DNAAF1	chr19:49821883-49842234	0.64412	0.64945	0.0118883	0.882049	0.331215	-1.41309	1.10161	0.772129	-0.512704	1.51369	1.40225	-0.110328	1.02285	0.769566	-0.410474	0.35075	0
PPP1R11	chr20:1694085-1703019	82.7487	74.3354	-0.154687	86.0222	70.0374	-0.296585	78.8157	67.4128	-0.225461	65.2803	66.9669	0.036799	78.7261	69.6806	-0.176086	0.35115	0
NGDN	chr15:33123039-33130280	24.1885	24.9895	0.0469986	33.2122	25.3488	-0.389794	38.379	38.4056	0.000998351	48.1499	39.8668	-0.272344	35.6611	31.6535	-0.171986	0.35125	0
KCNQ4	chr5:141286680-141339403	0.712529	1.10235	0.629555	0.766453	0.801621	0.0647237	0.670959	0.588473	-0.189247	0.636835	1.2375	0.958436	0.700643	0.932145	0.411874	0.35185	0
SLC39A12	chr17:88525526-88605947	1.1392	1.23067	0.111429	0.912257	1.34243	0.55734	1.58028	1.3529	-0.224123	0.725833	1.73934	1.26083	1.0869	1.40507	0.370426	0.35195	0
EPDR1	chr17:53134999-53160954	24.6572	25.9963	0.0762996	23.6791	25.3254	0.0969687	24.9752	28.4262	0.186721	20.2592	25.2726	0.318997	23.484	26.1563	0.155482	0.35205	0
RGD1310587	chr13:100875931-100885668	2.43068	3.72012	0.613985	2.88237	3.64552	0.338869	3.691	4.4543	0.271185	3.70643	3.29713	-0.168818	3.15491	3.76409	0.254701	0.35205	0
IGSF1	chrX:136291192-136306435	1.74697	1.65151	-0.0810687	1.54403	1.24412	-0.311566	2.50503	1.78982	-0.485014	2.30162	2.09402	-0.136374	2.00748	1.67663	-0.259817	0.35225	0
TFR2	chr12:19638501-19655420	2.95455	2.53383	-0.22162	3.62068	3.05421	-0.24546	5.22622	4.7683	-0.132293	4.93372	3.95754	-0.31807	4.14119	3.52137	-0.233911	0.35265	0
APOL3	chr7:115625312-115634307	0.493569	1.07032	1.11672	0.534109	0.951746	0.833443	0.965142	1.19633	0.309806	1.49113	1.51282	0.0208316	0.853735	1.16983	0.454439	0.353	0
N4BP2	chr14:45096626-45154785	3.02018	3.00948	-0.00511944	3.31275	2.91193	-0.186052	3.60548	3.12533	-0.206183	3.80191	2.95075	-0.365641	3.42795	2.98995	-0.197222	0.3538	0
GPNMB	chr4:77161351-77182624	8.85105	11.735	0.406898	10.8726	14.391	0.404463	44.5495	20.1569	-1.14414	9.5276	18.1376	0.928796	17.9303	15.8777	-0.175393	0.35385	0
PENK	chr5:17509321-17514265	137.593	165.938	0.270235	145.574	163.376	0.166442	201.348	214.172	0.0890748	202.667	218.079	0.10574	170.474	188.385	0.144132	0.3539	0
ART3	chr14:17198267-17280642	2.29508	0.947885	-1.27576	1.60683	1.49688	-0.102263	2.31317	2.3461	0.0203939	3.08886	1.8132	-0.768537	2.31264	1.62009	-0.513464	0.35395	0
KDM2A	chr1:206903426-206972529	36.4034	32.9288	-0.144724	36.0824	32.4824	-0.151635	33.5244	33.4494	-0.00323094	37.5771	32.9884	-0.187893	36.0104	32.8684	-0.131712	0.3541	0
DVL1	chr5:172705628-172717700	47.7164	47.1322	-0.0177743	53.672	47.8064	-0.166967	41.5096	38.7418	-0.0995532	47.4552	39.8772	-0.251005	47.8825	43.5315	-0.137438	0.3544	0
MC4R	chr18:63390921-63392809	0.860761	0.601663	-0.516658	0.821302	0.488176	-0.750511	1.18927	0.906965	-0.390963	0.953355	0.862546	-0.144411	0.95145	0.703018	-0.436566	0.35535	0
EZR	chr1:41177778-41221735	19.2115	20.0382	0.0607792	19.477	23.1323	0.248139	31.0113	30.6895	-0.0150525	25.1932	31.7359	0.333078	23.5178	26.0403	0.14699	0.3557	0
SLC16A3	chr10:110159678-110163182	24.7107	20.7789	-0.250015	25.1253	23.1149	-0.120318	23.225	19.4326	-0.257202	25.827	25.8964	0.00387033	24.7966	22.2293	-0.15768	0.35615	0
SLN	chr8:57314469-57318717	2.32515	2.48782	0.0975555	13.5971	6.741	-1.01227	2.06757	3.05482	0.56315	5.46679	1.47496	-1.89002	5.98968	3.49513	-0.777131	0.3574	0
ASNS	chr4:32758867-32776523	25.8538	26.4155	0.0310051	24.6223	26.5636	0.109483	31.0006	37.1447	0.260861	30.4308	35.2234	0.211003	27.8877	30.9678	0.151142	0.3575	0
UBP1	chr8:118573597-118669105	37.4337	32.0169	-0.225505	37.4869	33.6037	-0.157767	36.4815	35.141	-0.0540085	37.6837	35.0893	-0.102909	37.373	33.8093	-0.144578	0.3578	0
ACN9	chr4:32086333-32151178	10.2741	15.063	0.551994	16.7807	8.51512	-0.978706	7.1761	4.73164	-0.60086	7.10328	3.49644	-1.0226	10.53	8.1738	-0.365427	0.3579	0
MPP7	chr17:63989810-64282604	20.218	17.2322	-0.230529	18.8844	16.1788	-0.223096	10.5856	11.6711	0.140842	14.1123	11.0218	-0.356592	16.2023	14.1559	-0.194796	0.358	0
EVC2	chr14:78915868-79018416	1.12458	1.75239	0.639944	1.35506	1.00086	-0.437116	0.939172	1.07656	0.196973	0.696792	1.27557	0.872347	1.04256	1.28062	0.296716	0.35825	0
IQUB	chr4:50903800-50948982	2.14694	1.43538	-0.580845	1.66127	1.77422	0.0949008	4.27455	2.9502	-0.534959	3.05661	2.46576	-0.3099	2.73942	2.11717	-0.371731	0.3583	0
KLHL34	chrX:58442914-58445527	4.70763	6.39694	0.442382	4.01499	5.42536	0.434321	5.62651	5.36444	-0.0688117	4.69706	4.93457	0.0711658	4.74905	5.5415	0.222638	0.3585	0
1110034G24RIK	chr3:120455194-120537111	2.13843	2.99413	0.48558	2.48619	3.28351	0.401304	2.59128	3.10191	0.25949	2.46634	3.02063	0.292479	2.41942	3.09448	0.355036	0.3588	0
GRIA2	chr2:172265158-172385285	52.8013	52.0218	-0.0214594	57.3188	49.8702	-0.200833	49.9337	46.7543	-0.094914	47.6519	36.4216	-0.387737	52.2175	46.4388	-0.169203	0.35885	0
DGKI	chr4:64206331-64663627	22.515	22.1273	-0.0250631	19.5069	16.5229	-0.23952	13.8023	13.8104	0.000840773	11.3381	7.97025	-0.508481	17.0697	15.3333	-0.154776	0.3596	0
SERAC1	chr1:40820601-40858811	8.76319	7.49421	-0.225681	8.718	7.15609	-0.284826	5.59958	6.48096	0.210887	7.08094	5.8141	-0.284385	7.62978	6.75611	-0.175448	0.3602	0
GPR165	chrX:84285429-84291215	4.63532	4.36266	-0.0874613	4.63998	3.45469	-0.425563	3.1369	3.04551	-0.0426542	3.2554	2.60703	-0.320428	3.96748	3.39341	-0.225488	0.36035	0
SPICE1	chr11:57836724-57878435	3.24673	3.15365	-0.0419637	4.02344	3.30266	-0.2848	4.82147	3.65663	-0.39896	5.18804	4.73445	-0.131992	4.29089	3.67388	-0.22397	0.3606	0
RGS9BP	chr1:88115882-88116596	113.548	106.623	-0.0907834	110.06	93.2794	-0.238661	39.4107	44.7067	0.181906	58.1154	42.0119	-0.468123	82.3124	73.2146	-0.168978	0.36065	0
SPAG8	chr5:60128060-60130274	0.703829	0.829384	0.236816	1.45369	0.863661	-0.75118	3.86539	3.31677	-0.220833	3.9119	2.75502	-0.505809	2.40867	1.87012	-0.365104	0.36085	0
2010300C02RIK	chr9:36545456-36660932	0.927499	0.605903	-0.61426	0.792263	0.873458	0.140759	1.16336	0.784024	-0.569333	1.05187	0.882106	-0.253939	0.978977	0.781281	-0.325433	0.36105	0
COL2A1	chr7:136678921-136708058	22.7473	16.6472	-0.450412	26.1538	19.1095	-0.452727	29.6657	27.9343	-0.0867579	34.653	41.0678	0.245027	28.1583	25.6254	-0.135981	0.3611	0
IL1RAP	chr11:76092251-76222576	14.9525	11.1751	-0.4201	11.9584	12.9923	0.119635	11.6774	9.88638	-0.240207	10.3052	8.69273	-0.245488	12.3238	10.7423	-0.19814	0.36145	0
GTF2IRD2	chr12:23650479-23681961	7.95419	7.42804	-0.0987327	8.92433	8.44895	-0.078972	10.1398	7.91481	-0.357396	9.20748	8.11105	-0.182916	9.03958	7.95284	-0.184785	0.36155	0
GALM	chr6:3024122-3078720	5.87992	6.67898	0.183831	5.65569	6.37776	0.173346	7.34328	6.69146	-0.134103	5.31462	8.43606	0.666605	6.04288	6.99903	0.211918	0.36165	0
ENPEP	chr2:226731078-226732069	0.113054	1.46511	3.69592	0.980137	0.762989	-0.361321	0.682755	0.939474	0.460485	0.559869	0.338945	-0.724039	0.58182	0.889779	0.612875	0.36215	0
FGD6	chr7:31160020-31290471	5.83369	5.86508	0.00774251	5.71532	4.71072	-0.278887	4.49816	4.88125	0.117916	5.64636	3.70536	-0.607709	5.45876	4.8106	-0.182355	0.36235	0
TMEM147	chr1:85771679-85773503	27.3455	33.5752	0.296094	35.5324	40.2822	0.181008	47.6843	49.7191	0.0602855	43.8105	51.2384	0.225951	38.2585	43.1795	0.174568	0.36295	0
OVOL1	chr1:208192951-208204453	0.391764	0.520917	0.411069	0.488478	0.31961	-0.611982	1.19827	1.09069	-0.13572	1.82758	1.1088	-0.720939	0.949449	0.73797	-0.363527	0.3631	0
VAV2	chr3:6153680-6347676	16.4103	14.4021	-0.188325	16.3848	14.3491	-0.191401	13.8846	13.615	-0.0282854	13.8476	12.7014	-0.12464	15.2398	13.7705	-0.146262	0.3631	0
MYADML2	chr10:110039336-110040967	4.87199	4.22321	-0.206172	5.14006	4.75528	-0.112254	3.68155	2.56431	-0.521742	3.02018	2.13166	-0.502655	4.23379	3.47416	-0.285284	0.36325	0
ZFP27	chr1:84910247-84921191	0.425879	0.45994	0.111005	0.807485	0.8212	0.0242992	0.859918	0.32275	-1.41378	1.0585	0.480428	-1.13962	0.779964	0.526543	-0.566856	0.36335	0
ZFP358	chr12:2658622-2662716	16.3344	21.0139	0.363432	18.416	19.0242	0.0468767	17.9095	18.5942	0.0541298	17.647	20.3679	0.206875	17.6036	19.7228	0.163994	0.36355	0
UCHL3	chr15:85628489-85670420	7.08035	7.23633	0.0314385	7.12818	8.53286	0.259496	12.4796	16.3236	0.387385	15.9489	19.2002	0.267659	10.4891	12.493	0.252227	0.36395	0
DRC1	chr6:26009318-26044919	2.40214	1.50028	-0.679087	1.37937	1.51989	0.139961	3.23526	2.55973	-0.337888	2.88128	2.5462	-0.178368	2.44775	1.99511	-0.29499	0.36425	0
SPSB1	chr5:167012675-167073607	4.75868	5.34707	0.168188	5.11691	6.51213	0.347856	5.13911	5.09401	-0.0127187	2.80297	4.63153	0.724532	4.48732	5.41361	0.270737	0.3644	0
SMIM20	chr14:62461059-62470889	70.4537	83.6221	0.247209	17.7434	83.6878	2.23773	91.0028	65.5138	-0.474112	67.9453	80.9594	0.252825	60.9473	78.5785	0.366573	0.36505	0
ENTHD2	chr10:109503085-109510429	6.51493	7.60427	0.22306	8.49141	6.66017	-0.350445	11.6329	9.59536	-0.2778	11.4125	9.80219	-0.219445	9.41798	8.31935	-0.178946	0.3652	0
SLFNL1	chr5:141129297-141133769	2.67037	2.70433	0.0182308	2.828	2.25279	-0.328071	2.45388	1.55592	-0.657298	2.32617	1.6756	-0.473277	2.58546	2.0691	-0.321418	0.36525	0
4922501L14RIK	chr2:252555944-252591286	2.66193	2.35276	-0.178119	2.09333	1.72655	-0.277912	2.71111	2.26409	-0.259949	2.23975	1.46332	-0.614094	2.42928	1.95303	-0.314817	0.3654	0
ZFP161	chr9:108512809-108514157	22.1459	17.9404	-0.303831	21.0138	20.8398	-0.0119929	16.7756	14.8761	-0.173364	15.0296	12.4597	-0.270536	18.9453	16.657	-0.185713	0.36585	0
FERMT2	chr15:21358410-21427264	23.9183	27.3916	0.195616	24.5325	26.7498	0.124834	32.2466	34.5703	0.100384	32.103	36.0662	0.167939	28.0395	30.872	0.13884	0.36595	0
RBM45	chr3:59058685-59073662	12.0569	14.843	0.299927	12.9222	14.8187	0.197566	13.371	12.8772	-0.0542955	11.6415	14.2286	0.289512	12.5224	14.1971	0.181083	0.36605	0
LIF	chr14:84887855-84893722	0.46961	0.787621	0.74604	0.316311	1.14941	1.86148	2.10506	2.5989	0.304041	0.376539	0.773728	1.03903	0.791562	1.30138	0.717274	0.3665	0
KCNQ3	chr7:103324949-103627045	5.00778	5.28213	0.0769484	5.16793	4.02597	-0.36025	3.43551	3.48739	0.021625	3.10529	1.99393	-0.639115	4.23992	3.74779	-0.177996	0.36655	0
PDGFRB	chr18:57014474-57053581	4.17204	4.28133	0.0373073	4.6628	5.21839	0.162406	8.80129	10.3001	0.226872	8.52869	9.69449	0.184841	6.43454	7.19562	0.161281	0.3667	0
RGD1305537	chr10:1779732-1785219	5.16841	6.19301	0.260922	4.89544	6.69596	0.451853	5.4455	4.89554	-0.153598	3.80268	5.60093	0.558649	4.84807	5.86799	0.275458	0.3668	0
RT1-A2	chr20:5021815-5025341	20.9992	21.7238	0.0489403	19.904	25.3842	0.350868	47.6147	39.5232	-0.268706	31.0935	47.5247	0.612065	29.403	32.8522	0.160028	0.36755	0
NNT	chr2:51496456-51590052	13.3813	12.6296	-0.0834185	11.0507	14.7645	0.41799	14.85	13.3571	-0.152856	10.5147	14.679	0.481344	12.4596	13.8118	0.148644	0.3678	0
DUSP14	chr2_random:2483338-2485454	0.749439	0.405242	-0.887027	1.54581	0.794818	-0.959666	0.153554	0.576722	1.90913	1.13816	0.916681	-0.312214	0.914132	0.666829	-0.455086	0.3682	0
FGFRL1	chr14:1550893-1562953	4.64959	5.7041	0.294893	5.62235	6.30646	0.165658	11.3296	9.10345	-0.315613	4.651	9.2082	0.985376	6.48244	7.46627	0.203851	0.3685	0
SAMD4A	chr15:22847700-22952499	4.62405	4.89502	0.0821586	3.68905	4.12916	0.162596	3.50562	4.31991	0.301334	2.60658	3.691	0.501851	3.64561	4.26488	0.226346	0.36945	0
STX2	chr12:28751449-28776415	6.6204	6.05045	-0.129876	10.7278	9.73487	-0.140117	10.2922	8.40767	-0.291772	10.9452	7.25407	-0.593429	9.60982	7.83868	-0.293898	0.36985	0
ATP7B	chr16:74607987-74680080	5.85251	6.10284	0.0604252	6.37205	6.80761	0.0953911	4.64004	5.35947	0.207955	4.14106	5.48387	0.405195	5.3112	5.95441	0.164921	0.37055	0
ZFAND4	chr4:152403930-152477554	8.04477	6.78233	-0.24627	6.76726	5.553	-0.285306	5.61706	5.26099	-0.094483	6.83768	6.20508	-0.140057	6.87068	5.95157	-0.207183	0.37065	0
WDR83OS	chr19:24731658-24733024	11.2186	15.1345	0.431945	6.94158	12.0446	0.795056	38.2217	38.9442	0.0270148	42.2417	50.4035	0.254858	23.841	28.1315	0.23874	0.3709	0
RBMS1	chr3:42435776-42663730	6.00241	6.40537	0.0937409	4.88614	7.48967	0.616206	6.53288	7.31862	0.163853	6.86862	7.12413	0.0526941	6.05329	7.05744	0.221426	0.3711	0
RPH3AL	chr10:63179936-63265568	0.762311	0.768591	0.0118363	0.549568	0.881975	0.682439	0.596788	1.06855	0.840357	1.04376	1.21979	0.22484	0.736374	0.972606	0.401417	0.37145	0
MALL	chr3:115230797-115253566	0.108621	0.234672	1.11135	0.117475	0.418904	1.83427	0.486901	1.13995	1.22727	2.78284	0.713528	-1.96351	0.837384	0.606681	-0.464952	0.37165	0
INPP5B	chr5:144069518-144134613	24.6153	23.3859	-0.0739214	25.641	23.0843	-0.15154	38.7112	35.8286	-0.111641	39.9027	35.9309	-0.15126	31.8913	29.105	-0.131894	0.37195	0
RPL34	chr2:228146284-228150017	220.823	204.036	-0.114069	201.973	310.89	0.622245	357.504	385.503	0.108783	367.154	374.454	0.0284057	283.289	314.083	0.148868	0.3722	0
ALPK1	chr2:224933611-225056763	2.88373	2.92088	0.0184659	2.83391	2.3749	-0.254926	2.58292	1.742	-0.568259	1.85026	1.57625	-0.231229	2.56058	2.17905	-0.232773	0.37245	0
EPB4.1L5	chr13:32373376-32426745	11.4594	10.2003	-0.167912	11.1358	8.81399	-0.337344	8.42154	10.4687	0.313932	9.92626	6.8742	-0.530058	10.324	9.09371	-0.183065	0.3733	0
BOC	chr11:57668347-57743722	1.2773	1.35845	0.0888556	1.29356	1.27001	-0.026511	2.30841	1.81506	-0.346887	1.40913	3.1262	1.1496	1.55764	1.85356	0.250942	0.37345	0
CPSF7	chr1:213008858-213032949	27.8525	25.593	-0.122059	30.3183	26.8383	-0.175895	47.6165	42.9999	-0.147129	48.628	46.0626	-0.0781927	38.1521	34.7344	-0.135399	0.37345	0
ARHGAP33	chr1:85568527-85579936	14.9	13.9583	-0.094185	15.7438	12.838	-0.294362	14.8806	14.7462	-0.0130896	14.2818	12.9157	-0.145056	15.0058	13.57	-0.145098	0.374	0
SLC25A37	chr15:49803822-49847010	2.75941	2.03342	-0.440449	3.39322	2.35952	-0.52416	2.63363	1.90477	-0.467431	1.96869	2.16823	0.139277	2.71506	2.1159	-0.359714	0.3741	0
APOC4	chr1:78985349-78989564	1.59191	0.85843	-0.890982	0.435539	0.767331	0.817048	1.64921	1.58329	-0.058855	3.94909	1.55814	-1.34169	1.86634	1.16617	-0.678431	0.3742	0
HCN3	chr2:181214852-181237288	32.5684	30.5647	-0.0916107	37.466	31.1701	-0.26542	24.1628	21.6419	-0.15896	21.4544	20.5987	-0.0587187	29.3173	26.2249	-0.160815	0.3744	0
PLAT	chr16:73711322-73736328	24.0208	24.8789	0.0506398	21.7948	26.276	0.26976	46.7918	30.7618	-0.605117	31.6953	30.1129	-0.0738873	30.6561	27.791	-0.141554	0.3745	0
RGD1563982	chr1:83799994-83807135	5.6535	4.2483	-0.41226	3.65621	5.15454	0.495493	10.1366	5.95042	-0.768516	6.27101	6.3398	0.015739	6.33821	5.36536	-0.240401	0.3745	0
ZBTB20	chr11:58662836-59399213	4.66366	6.00073	0.363677	4.19739	4.03323	-0.0575578	2.51342	3.92313	0.642357	1.9903	1.28329	-0.633133	3.41071	3.8761	0.184533	0.37455	0
MTO1	chr8:83444227-83457260	5.78122	6.09407	0.0760335	4.92674	7.16625	0.540583	14.3392	16.3407	0.1885	11.2038	14.1617	0.338012	8.86767	10.6514	0.264419	0.3746	0
ZDHHC4	chr12:11591852-11605772	8.80588	11.3264	0.363156	8.74675	9.87882	0.175591	13.0064	14.0716	0.11357	12.2864	14.6357	0.252437	10.6251	12.3374	0.215555	0.3748	0
HOOK2	chr19:24808197-24819480	5.53808	5.25113	-0.0767593	6.89099	5.87733	-0.229549	8.18893	7.29989	-0.1658	8.47658	6.98145	-0.279957	7.22938	6.28849	-0.201158	0.375	0
IWS1	chr18:24489546-24524125	20.6257	18.198	-0.180666	20.0501	17.7991	-0.171801	15.7267	16.5256	0.07149	17.8517	14.7347	-0.276842	18.7138	16.8457	-0.151719	0.375	0
BRD8	chr18:27073612-27099845	34.4667	31.4346	-0.13285	34.7821	30.4779	-0.190582	32.1119	30.7507	-0.0624893	31.5679	29.2691	-0.109081	33.3887	30.4397	-0.133407	0.37515	0
NPPC	chr9:85434253-85438454	1.27849	2.09003	0.709077	0.706821	2.04758	1.5345	2.2302	1.48148	-0.590132	1.4516	2.58427	0.832114	1.39525	2.04718	0.553117	0.37515	0
SLC30A3	chr6:25257764-25265001	5.49731	4.6673	-0.236137	5.15849	8.25461	0.678252	8.43774	9.15683	0.117991	6.9752	8.46459	0.279206	6.46234	7.54059	0.222619	0.37565	0
TMEM198B	chr7:2099866-2104201	2.67139	4.38861	0.716175	2.5061	3.20451	0.35466	3.98034	3.56393	-0.159421	3.62311	3.90903	0.109582	3.16769	3.76126	0.247783	0.37575	0
EHHADH	chr11:81474160-81507645	1.94224	1.84778	-0.07193	2.75656	2.04032	-0.434073	3.09569	2.39623	-0.369497	2.41266	2.31616	-0.0588856	2.54384	2.13219	-0.254675	0.3758	0
ASB1	chr9:90758692-90779095	10.8184	10.186	-0.0868982	11.9111	8.86076	-0.4268	6.07131	5.78268	-0.0702698	5.47415	4.79425	-0.19133	8.74579	7.51795	-0.218248	0.37615	0
TCEANC	chrX:48642413-48643490	4.6508	3.38499	-0.458326	6.13321	5.26378	-0.220544	3.75195	3.99464	0.0904248	4.20105	2.51615	-0.739532	4.73465	3.80962	-0.31361	0.37615	0
ZFP804B	chr4:23229254-23773114	10.5398	10.0433	-0.0696063	9.2646	8.96277	-0.0477836	8.28346	7.3618	-0.170174	7.10594	5.06198	-0.489324	8.88145	7.93903	-0.161832	0.37615	0
CLK1	chr9:57070821-57082069	35.8887	36.0339	0.00582667	45.8126	37.1339	-0.303006	72.3839	65.6449	-0.140986	81.6095	66.0581	-0.305002	58.0398	50.2089	-0.2091	0.3762	0
TRMT44	chr14:80815910-80833797	5.01122	4.54771	-0.14002	4.98174	4.00331	-0.315456	4.67769	4.28396	-0.126852	4.59372	3.97101	-0.210156	4.83766	4.19667	-0.205064	0.37625	0
OTUD4	chr19:30121514-30167942	15.286	14.7962	-0.0469805	15.8748	13.9352	-0.188011	15.2836	16.0372	0.069435	17.1242	12.7757	-0.422628	15.9151	14.3506	-0.149284	0.37705	0
RGD1563547	chr10:10688459-10689937	0.216124	0.233293	0.110279	0.940186	0.208363	-2.17385	0.276929	0.311127	0.167988	0.168472	2.30768	3.77586	0.410328	0.731147	0.833385	0.37705	0
LMBR1L	chr7:137677211-137692594	46.5229	42.7559	-0.121816	58.8556	49.2108	-0.258204	45.4878	44.8664	-0.0198454	60.5222	53.3686	-0.181473	52.9781	47.3347	-0.162499	0.3771	0
CCDC11	chr18:71083090-71151860	1.23642	1.16868	-0.0812862	1.05851	1.49012	0.4934	1.0236	1.60422	0.648212	1.05763	1.51519	0.518663	1.09981	1.4336	0.382381	0.3772	0
2810474O19RIK	chr4:186780131-186789650	5.87737	5.01518	-0.228868	5.16648	4.96901	-0.0562236	5.73477	5.44986	-0.073516	6.7171	5.57793	-0.268109	5.87076	5.22477	-0.168179	0.37725	0
SMYD3	chr13:94643718-95215840	12.2854	11.2668	-0.12487	6.18872	10.4294	0.752947	9.11955	10.9876	0.268841	9.04932	10.0884	0.156822	9.1947	10.6779	0.215747	0.37725	0
TRAFD1	chr12:36301823-36315741	53.853	47.3256	-0.186407	59.42	54.1909	-0.132898	71.0861	69.1839	-0.0391322	76.6094	69.6923	-0.136523	64.9107	59.379	-0.128503	0.37725	0
JDP2	chr6:109708744-109740375	13.985	18.8411	0.430006	18.3437	20.2889	0.14541	10.0066	10.4637	0.0644374	10.4335	12.3509	0.24339	13.3879	15.6941	0.229288	0.37735	0
4930432K21RIK	chr19:25673903-25695610	0.670499	0.468696	-0.516584	0.596882	0.760543	0.349584	1.45177	0.803093	-0.854179	0.95146	0.737347	-0.367799	0.902726	0.685574	-0.396976	0.3778	0
REL	chr14:104645090-104671544	1.01188	1.68177	0.732939	1.09379	1.7636	0.689186	1.32475	1.34142	0.0180409	1.10685	0.879403	-0.331867	1.13182	1.43137	0.338759	0.3778	0
DHH	chr7:137666983-137672479	1.29944	1.84502	0.505741	1.44467	1.7898	0.309058	1.70367	1.80478	0.0831799	1.53749	1.91109	0.313817	1.49226	1.83218	0.296062	0.3783	0
PPAPDC1A	chr1:188518589-188643804	0.168115	0.998684	2.57058	1.09203	1.29668	0.247815	0.74315	0.901573	0.27879	1.05818	1.08722	0.0390633	0.758908	1.07271	0.499259	0.37845	0
ST18	chr5:12665462-13053502	14.6039	13.4328	-0.120594	13.2069	12.433	-0.0871105	13.4203	12.3087	-0.12473	11.821	9.67913	-0.288396	13.3296	11.994	-0.152312	0.37845	0
RGD1565367	chr4:62344187-62394263	1.04873	1.02992	-0.0261107	1.34013	0.873247	-0.617913	2.47332	2.34233	-0.0785047	2.73826	1.8485	-0.566906	1.86458	1.48535	-0.328052	0.37875	0
GLRA4	chrX:124410008-124430532	2.52194	3.11323	0.303877	2.80715	3.19568	0.187016	1.57691	2.33217	0.56457	1.58332	2.15155	0.442424	2.15789	2.71909	0.333503	0.3788	0
URB1	chr11:30732789-30793473	6.70604	6.55006	-0.0339528	6.81238	5.86765	-0.215376	7.13294	6.85887	-0.056525	7.26902	6.03317	-0.268844	6.98421	6.30591	-0.147392	0.37895	0
ABCC2	chr1_random:3583056-3596051	2.12748	1.08146	-0.976168	1.82771	0.965267	-0.921034	1.50445	2.03472	0.435589	1.27626	1.34812	0.0790308	1.70462	1.33388	-0.353818	0.37905	0
POMP	chr12:7719720-7732544	84.1962	108.839	0.370365	96.784	116.515	0.267677	207.276	202.393	-0.0343911	196.913	229.724	0.222349	143.423	160.847	0.165419	0.3791	0
SYT16	chr6:96520634-96775437	3.38106	3.00584	-0.169707	3.31169	2.71655	-0.285793	3.38226	2.79165	-0.276873	3.49829	2.99709	-0.223091	3.39903	2.87043	-0.243859	0.3792	0
JUNB	chr19:24831486-24833320	18.2903	17.7653	-0.0420154	20.6921	20.3787	-0.0220193	36.015	33.0976	-0.121872	20.415	36.1171	0.823053	23.6262	26.3033	0.154858	0.3793	0
CALN1	chr12:26852387-27340159	15.6603	23.3277	0.574936	17.4504	18.5644	0.089279	9.65566	9.53992	-0.0173977	8.78487	9.55502	0.121238	13.1231	15.5624	0.245949	0.37935	0
PGP	chr10:13722364-13724991	35.0956	39.6182	0.174872	39.1167	42.7675	0.128729	25.2387	27.8411	0.141577	26.8823	31.0815	0.209398	31.97	35.5941	0.154918	0.37935	0
CACNA1H	chr10:14617610-14679051	29.3564	27.6059	-0.0886965	30.1024	28.127	-0.0979193	31.0231	30.2038	-0.0386138	28.8774	23.9661	-0.268945	29.8989	27.4305	-0.124312	0.3794	0
CHD5	chr5:169570780-169621197	37.4976	37.1202	-0.0145958	36.7767	34.6097	-0.0876155	31.9295	29.568	-0.110852	29.7165	23.3063	-0.350544	34.237	31.3632	-0.126482	0.37985	0
GM14378	chr12:1539655-1542998	2.11946	1.78022	-0.25164	4.3392	2.95159	-0.555935	6.14959	6.56765	0.0948871	8.52944	5.98683	-0.510659	5.18186	4.19094	-0.306196	0.38005	0
RNF135	chr10:68395226-68413513	2.49565	3.53582	0.502628	2.56517	3.27399	0.351996	4.11711	4.03413	-0.0293752	2.71174	3.31176	0.288378	2.95132	3.52251	0.255243	0.3801	0
TNFSF10	chr2:113204303-113221548	1.5116	1.48388	-0.0267031	0.447134	2.38476	2.41506	1.36784	1.02611	-0.414718	1.00679	1.11897	0.152415	1.08065	1.52449	0.496433	0.3803	0
RIMBP2	chr12:28809986-29012169	12.7455	12.4543	-0.0333438	13.6766	11.8135	-0.211267	12.9561	12.5984	-0.040399	12.5774	10.5963	-0.247283	13.0304	11.8537	-0.136537	0.38045	0
ITSN2	chrUn:42842412-42932046	22.4803	20.3814	-0.14141	22.2001	20.0191	-0.149188	23.3257	26.7538	0.197827	31.5152	24.5504	-0.360296	24.8118	22.7063	-0.127933	0.3806	0
TMEM108	chr8:108525169-108800405	10.2504	11.254	0.134762	10.9918	11.3078	0.040885	9.07379	10.7586	0.245711	12.2516	15.2184	0.312842	10.6714	12.0554	0.175934	0.38075	0
KIF18A	chr3:94825018-94885158	1.3221	1.13618	-0.218639	0.779279	1.41956	0.865228	1.48829	1.3949	-0.0934936	1.35373	2.18769	0.692467	1.22867	1.51523	0.302439	0.3809	0
PCDHB16	chr18:30289511-30294333	0.747351	0.745335	-0.00389625	0.972897	0.535804	-0.860583	0.739101	0.788343	0.0930516	0.969278	0.724331	-0.420262	0.859535	0.693591	-0.309471	0.38095	0
MTX1	chr2:181379689-181381406	3.78547	2.24768	-0.752039	2.67351	1.6423	-0.703017	6.13548	4.68978	-0.387656	6.88663	6.55303	-0.0716348	4.79136	3.66465	-0.386759	0.38105	0
CDH13	chr19:48507143-49575122	20.2856	17.5538	-0.208672	19.6289	17.5057	-0.16515	17.7968	15.2202	-0.225627	14.928	14.8298	-0.00951748	18.3004	16.3141	-0.165755	0.3812	0
PPP1R3C	chr1:240991883-240996887	25.4288	25.2569	-0.00978421	25.123	25.7288	0.0343739	33.5162	26.6805	-0.329072	29.4559	25.4065	-0.213361	28.2635	25.6887	-0.137808	0.38125	0
MTHFR	chr5:165112826-165130561	3.97258	4.0808	0.0387732	4.90979	3.47022	-0.500633	3.45192	3.59703	0.0594054	4.57212	3.84686	-0.249182	4.24993	3.74243	-0.183462	0.3813	0
CHODL	chr11:17993679-18015913	2.48104	2.11829	-0.228043	2.63871	1.89052	-0.481045	2.22273	1.81714	-0.290664	2.24021	2.11899	-0.0802602	2.41054	1.98305	-0.281631	0.3817	0
ANKRD37	chr16:49549526-49552416	8.41392	6.94692	-0.276404	8.05982	6.04415	-0.415208	11.7856	9.97113	-0.241198	14.5475	12.767	-0.188346	10.5928	8.76607	-0.273085	0.3818	0
LTBP4	chr1:82385952-82418177	8.18617	7.64589	-0.098505	8.47897	7.30932	-0.214152	8.66204	8.20161	-0.0787996	9.0723	8.04503	-0.17337	8.6055	7.76275	-0.14869	0.3818	0
ERI2	chr1:178054385-178090401	5.52416	5.07575	-0.122135	6.3591	5.10215	-0.317717	6.74792	7.08325	0.0699685	7.24073	5.76744	-0.328203	6.45325	5.70246	-0.178443	0.38195	0
NRBP2	chr7:114117883-114123617	22.5771	21.1963	-0.0910455	27.1457	22.8745	-0.246983	37.7731	34.9256	-0.113075	36.4262	34.4999	-0.0783858	30.6967	27.9202	-0.136775	0.38205	0
B4GALT7	chr17:15059957-15068556	15.5586	14.1419	-0.137738	17.4479	14.9398	-0.223896	14.7673	13.8041	-0.0973069	16.0111	13.8647	-0.207653	16.0159	14.1738	-0.176274	0.3821	0
PHLDA3	chr13:48789677-48793999	5.52831	5.05275	-0.129768	5.75226	7.38008	0.359507	6.64431	8.41617	0.341044	4.43564	5.91851	0.416091	5.60142	6.64253	0.245939	0.3824	0
CEP112	chr10:97749013-98220467	3.32999	3.62553	0.122678	3.20744	3.40973	0.0882347	3.08564	3.76552	0.287279	2.98213	3.90922	0.390538	3.16541	3.65943	0.209227	0.38265	0
RPS28	chr7:16319718-16321088	141.875	131.513	-0.109415	94.6808	128.415	0.439676	146.907	183.854	0.323654	145	166.923	0.203132	131.699	150.937	0.1967	0.3827	0
CYBB	chrX:25511848-25547257	0.94806	0.921846	-0.0404521	0.512133	0.731262	0.51387	2.80284	1.1225	-1.32017	0.597789	1.06127	0.82808	1.18651	0.949184	-0.32196	0.3828	0
SMCO4	chr8:12328340-12347918	1.16294	1.39535	0.262858	1.40108	2.36699	0.756513	1.37707	1.54981	0.17049	0.95108	1.44078	0.599212	1.22812	1.69428	0.464227	0.3828	0
GLT8D1	chr16:6428927-6444326	12.2279	13.0701	0.0960978	15.465	11.8838	-0.380015	26.1831	26.0795	-0.00571881	32.6269	26.4765	-0.301346	21.2428	18.9159	-0.16737	0.38285	0
SMG5	chr2:180448764-180475865	39.0069	36.8499	-0.082067	42.6561	37.468	-0.187094	38.9163	38.4308	-0.0181109	42.0836	37.2827	-0.17475	40.7733	37.3956	-0.124755	0.3829	0
NFKBIZ	chr11:45776026-45811515	2.19478	1.23692	-0.827327	1.52459	2.64969	0.797401	4.6433	2.61001	-0.831092	2.51092	2.54341	0.0185458	2.67245	2.2332	-0.25905	0.383	0
GPR124	chr16:69250415-69293569	18.7879	19.266	0.0362507	18.987	20.449	0.107015	17.0519	18.9706	0.153828	15.6265	19.5427	0.322629	17.7245	19.5268	0.139708	0.38315	0
POLI	chr18:67212983-67230580	5.8459	5.84916	0.000804397	6.82808	4.46366	-0.613252	5.8317	5.0396	-0.210606	4.93576	5.07379	0.0397896	5.89828	5.09955	-0.209924	0.38315	0
CAR11	chr1:96167748-96172947	32.7078	24.28	-0.429865	31.9719	26.526	-0.269398	76.6797	79.172	0.0461451	83.5797	75.2673	-0.15113	55.0218	49.6164	-0.149186	0.3835	0
EFHD1	chr9:86076008-86124552	12.848	14.3888	0.163408	13.1571	15.2187	0.209999	17.8087	19.1373	0.103809	17.5299	20.4054	0.219139	15.2384	17.0952	0.16588	0.38365	0
RGD1562533	chr12:7258574-7301594	29.4103	27.4397	-0.100056	27.8329	28.1064	0.0141091	25.019	21.3473	-0.228971	24.4702	18.7302	-0.385661	26.8578	24.0805	-0.157474	0.3837	0
SELRC1	chr5:129422788-129433620	3.84629	6.26819	0.704583	5.67146	5.65689	-0.00371025	4.58776	4.35447	-0.075294	3.91951	4.48511	0.194468	4.52757	5.22639	0.20708	0.3839	0
PHYHIP	chr15:50860497-50871752	9.79403	8.22634	-0.251652	9.63514	8.83814	-0.124563	12.1222	9.75465	-0.313489	9.855	10.2513	0.0568816	10.3354	9.2002	-0.167861	0.3842	0
TMEM117	chr7:133130908-133634814	7.05744	8.08335	0.195808	8.0508	9.60814	0.255125	7.85392	8.49828	0.113759	7.06596	7.86732	0.154987	7.5246	8.5113	0.177765	0.38455	0
ADH5	chr2:235979107-235991515	49.2701	54.2469	0.138826	47.3788	51.3147	0.115131	60.0491	65.0125	0.114574	57.9353	66.8291	0.206034	53.4799	58.8169	0.137233	0.3846	0
RGD1308299	chr9:7962958-7969801	3.2848	5.60187	0.7701	4.39881	5.16719	0.232265	6.342	5.75491	-0.140144	5.79573	7.2256	0.318126	4.90108	5.89099	0.26541	0.3847	0
LRRC16A	chr17:47923815-48206594	21.2348	20.7654	-0.0322495	23.6892	20.1597	-0.232756	26.5855	26.2893	-0.0161633	27.1756	23.5087	-0.209115	24.6019	22.4923	-0.129337	0.3853	0
RT1-DB1	chr20:4671488-4681058	3.50695	2.73079	-0.360899	2.38377	2.35896	-0.0150942	8.66264	8.75823	0.0158336	3.08459	7.95302	1.36642	4.32658	5.26186	0.282345	0.38565	0
NFKB2	chr1:251520130-251527883	2.06656	2.85818	0.467866	1.88799	2.4234	0.360185	3.73097	3.52381	-0.0824157	2.59128	3.28725	0.34322	2.53947	2.99342	0.237263	0.38575	0
AXL	chr1:80962745-80994374	18.6028	18.7666	0.0126432	16.8938	21.4765	0.346262	17.6175	15.2092	-0.212065	9.64898	14.5397	0.591552	15.8311	17.6102	0.153645	0.38585	0
RGD1563888	chr11:17447880-17475965	58.2934	58.2847	-0.000214481	61.7566	48.0055	-0.363396	34.1548	43.2767	0.341505	53.0201	37.1055	-0.514905	52.4314	46.962	-0.158936	0.38605	0
LSM5	chr4:85656849-85660066	22.6804	34.1328	0.589711	37.4295	31.3594	-0.255279	19.9205	25.244	0.341689	20.9319	28.7857	0.459654	25.5574	29.9879	0.230642	0.3862	0
EXOC3L1	chr19:35104613-35110283	2.37892	2.37448	-0.00269399	4.03489	3.12129	-0.370385	4.0469	3.70262	-0.128271	5.0536	4.08289	-0.307719	3.8494	3.27665	-0.232412	0.38625	0
UBAC2	chr15:106978548-107125419	27.562	30.3643	0.139696	24.9373	29.3803	0.236546	31.3078	31.3572	0.00227268	28.9711	33.8312	0.223739	28.1493	31.0787	0.142827	0.3866	0
TIE1	chr5:138945237-138964631	5.52924	6.37366	0.205041	5.72363	6.11175	0.0946549	5.00357	6.10097	0.286081	3.80409	4.19938	0.142626	5.05913	5.71556	0.176004	0.38675	0
MERTK	chr3:116308386-116416414	25.2085	30.7431	0.286354	24.5358	25.7413	0.0692012	17.9622	19.3214	0.105232	14.8725	15.3983	0.050122	20.9291	23.0819	0.141255	0.3868	0
PINX1	chr15:43124866-43184609	4.60071	4.3625	-0.0766995	3.76496	5.40906	0.522745	6.40222	7.64677	0.256278	6.85976	9.26297	0.433317	5.35204	6.54534	0.290379	0.38725	0
CACNA1F	chrX:26908849-26937165	46.759	41.3502	-0.177351	55.0925	46.6114	-0.241174	61.5681	70.5862	0.197203	79.4841	66.3011	-0.261634	60.3375	55.3284	-0.125036	0.38735	0
RAB3IL1	chr1:212466296-212483344	7.0939	5.64999	-0.328329	6.66032	5.57452	-0.256742	6.7103	5.33418	-0.33111	5.35337	5.26671	-0.0235454	6.49164	5.45282	-0.251581	0.38735	0
RGD1305939	chr7:117441098-117469873	1.65061	0.944061	-0.806044	1.99367	0.967343	-1.04333	3.29279	3.20494	-0.0390105	4.20032	4.37798	0.0597665	2.73755	2.28257	-0.262224	0.3874	0
FAM171A1	chr17:86143662-86266918	8.23483	6.41712	-0.359811	6.82978	6.66305	-0.035655	6.21127	5.09372	-0.28617	4.97254	5.00407	0.00911878	6.63227	5.82519	-0.187196	0.38745	0
LINGO2	chr5:52476740-52590042	6.0066	5.55725	-0.112175	5.48994	6.53059	0.250423	6.43564	6.22858	-0.0471816	5.30881	8.3458	0.652661	5.81886	6.61126	0.184187	0.38765	0
GRIN2D	chr1:96308547-96345931	3.24663	2.96082	-0.132946	2.77154	2.59172	-0.0967752	2.48687	2.32196	-0.0989899	3.35236	2.47644	-0.436907	2.97633	2.59358	-0.198587	0.3878	0
TFB2M	chr13:95228519-95246255	13.1351	13.1056	-0.00323618	14.0536	11.301	-0.314491	16.2017	16.0949	-0.00953506	18.283	14.943	-0.291036	15.3541	13.7302	-0.16127	0.3878	0
TLE2	chr7:9592237-9607494	10.5079	10.2707	-0.0329442	14.8506	11.9328	-0.315589	20.4038	20.2146	-0.0134345	20.999	18.0006	-0.222277	16.497	14.8231	-0.154351	0.38825	0
IGFBP7	chr14:33010182-33107615	134.555	141.311	0.0706866	138.877	151.484	0.12536	162.303	139.568	-0.217723	135.531	225.456	0.734226	142.747	162.985	0.191279	0.3883	0
RPAIN	chr10:57874556-57881526	4.66985	3.73467	-0.322393	5.82243	5.33594	-0.12588	6.43813	6.98526	0.117673	9.8005	5.2822	-0.891716	6.62213	5.27028	-0.329414	0.38835	0
CD82	chr3:77831770-77875764	26.1895	31.2691	0.255747	33.4259	35.6267	0.0919947	44.0827	41.5285	-0.0861083	35.9302	46.0014	0.35648	34.6732	38.1969	0.139637	0.3884	0
OTUD3	chr5:157718628-157741095	11.7085	7.65864	-0.612391	8.5154	9.03088	0.0847914	5.22194	6.23718	0.256307	6.40317	4.74864	-0.431271	8.1102	6.98577	-0.215318	0.3884	0
ABHD4	chr15:32312515-32325153	52.9618	52.0557	-0.0248966	57.8726	63.6154	0.136498	83.9536	87.3981	0.0580083	68.6314	86.4827	0.333542	65.3786	71.3164	0.125414	0.38845	0
AMER2	chr15:39468972-39471994	46.5663	42.4414	-0.133813	45.599	40.929	-0.15588	22.6716	27.8997	0.299368	32.2263	22.8652	-0.495085	37.4046	33.947	-0.139933	0.38845	0
FAM122B	chrX:140193646-140219594	1.16099	1.22924	0.0824078	1.25429	1.29847	0.0499472	1.33263	1.96159	0.557752	1.11102	1.47785	0.411617	1.21663	1.47415	0.276994	0.38845	0
RGD1565616	chr3:118334337-118467517	35.8098	32.315	-0.148154	40.893	34.1136	-0.261508	29.7274	34.878	0.230525	40.4785	34.8344	-0.216643	36.9222	33.9013	-0.123147	0.38845	0
DOCK8	chr1:228441383-228634717	2.51384	2.71608	0.111632	2.21112	2.93921	0.410651	3.4669	3.25241	-0.0921378	1.9734	2.58162	0.387589	2.53449	2.86216	0.175406	0.3886	0
ANO3	chr3:96121303-96505426	7.6815	7.07625	-0.118405	6.93439	6.14324	-0.174769	9.34669	9.1999	-0.0228371	8.73144	7.23224	-0.271777	8.14331	7.34737	-0.148386	0.38875	0
SULF1	chr5:5582455-5748171	40.3813	38.9629	-0.0515832	36.165	40.2902	0.155834	61.5923	38.9677	-0.660471	30.2253	35.5171	0.232755	41.9146	38.4113	-0.125923	0.38875	0
PRLHR	chr1:267068379-267070067	1.10823	2.61859	1.24053	1.94867	2.67122	0.455007	1.51782	1.01555	-0.579732	1.28994	1.11528	-0.209894	1.47162	1.89842	0.367395	0.3888	0
IGTP	chr10:43829272-43837086	3.62392	4.30152	0.247296	2.95062	4.65866	0.658896	9.08117	6.2203	-0.545894	4.34197	8.13194	0.905252	4.90491	5.7328	0.225011	0.3889	0
DPY19L4	chr5:25101965-25157757	13.1446	11.7247	-0.164928	11.0006	10.1712	-0.113088	10.6796	9.42366	-0.180499	8.65386	7.6897	-0.170417	10.9626	9.80309	-0.161288	0.39	0
RRP1B	chr20:10453905-10479719	28.7305	28.482	-0.0125318	31.0873	24.4174	-0.348415	17.5255	23.0295	0.394021	31.7953	24.7103	-0.363697	27.525	25.1846	-0.1282	0.39	0
COX4I2	chr3:143103347-143114236	17.9228	18.9461	0.0801013	19.2694	24.659	0.355803	67.4958	75.4655	0.161019	66.102	75.9117	0.199629	41.4213	46.9912	0.182019	0.3902	0
XXYLT1	chr11:71532860-71660303	12.7786	15.1983	0.250186	12.4627	11.3877	-0.130147	7.24797	8.52003	0.233281	7.39368	10.2631	0.473108	10.146	11.4397	0.173138	0.39065	0
BNC2	chr5:103143809-103474243	1.11752	1.02162	-0.129443	0.812579	0.911704	0.166057	0.677427	1.12083	0.726435	0.524039	0.878917	0.746054	0.795212	0.979999	0.301441	0.39075	0
NSMCE2	chr7:96167543-96393594	17.5911	20.4114	0.214526	19.8728	22.6541	0.188979	28.2187	29.5057	0.0643426	26.1807	31.8606	0.283268	22.772	25.7662	0.178221	0.39075	0
ZFP697	chr2:193211655-193244887	3.23564	2.33439	-0.471006	2.97979	1.80121	-0.726245	1.40998	1.61554	0.196348	1.20164	1.407	0.227612	2.26323	1.80284	-0.328107	0.39085	0
HEATR6	chr10:71976963-72007461	9.27223	8.18106	-0.180627	9.30416	7.53706	-0.303875	7.03533	8.05067	0.19449	7.93156	6.56329	-0.273185	8.45894	7.58212	-0.157874	0.3914	0
FOXC1	chr17:39026185-39030171	0.552426	0.477471	-0.210367	0.549054	0.34088	-0.687683	1.05223	1.22192	0.215694	2.03907	1.40724	-0.535046	1.02437	0.832731	-0.298821	0.3915	0
CLEC11A	chr1:94785178-94788320	6.42798	5.07439	-0.341131	5.34677	5.19638	-0.0411613	4.34058	3.66049	-0.245853	4.82769	4.02272	-0.26316	5.28771	4.5168	-0.227342	0.39205	0
BST1	chr14:72404262-72414498	0.689394	0.59554	-0.211131	0.598187	1.06345	0.830078	1.55509	2.05865	0.404696	2.13201	3.26534	0.615018	1.21375	1.68587	0.474021	0.3923	0
RRP9	chr8:111621967-111630963	10.805	9.46145	-0.191562	11.4821	12.4517	0.116959	18.7418	18.1544	-0.0459404	24.051	17.7959	-0.434558	16.0265	14.2142	-0.173128	0.3924	0
COX17	chr11:64180264-64186042	138.171	174.849	0.339655	157.985	165.268	0.065014	123.707	122.841	-0.0101309	130.15	153.855	0.241392	138.419	154.819	0.161541	0.3926	0
ERCC2	chr1:78899458-78913219	28.2743	26.8673	-0.0736377	33.3895	29.3132	-0.187843	31.3128	32.753	0.0648733	39.326	33.0859	-0.249268	33.036	30.2821	-0.125572	0.3926	0
GRIK2	chr20:53231472-53713129	11.5818	9.40272	-0.300713	10.1472	9.67996	-0.0680052	10.6399	10.1161	-0.0728394	9.35775	8.1902	-0.192265	10.4803	9.33547	-0.16689	0.3926	0
KLF15	chr4:124714346-124726991	6.52996	8.65846	0.407036	6.86931	7.50732	0.128132	5.59907	5.07141	-0.142799	5.92624	7.42325	0.324933	6.27285	7.20612	0.200101	0.3928	0
WDR8	chr5:171103734-171109776	21.3069	26.0334	0.289044	16.1054	22.3663	0.473784	10.3092	11.2309	0.123547	8.72147	11.3313	0.377673	14.4095	18.0944	0.328517	0.39285	0
CLK2	chr2:181249543-181257364	16.0679	13.2878	-0.274079	19.2267	15.9458	-0.269939	33.0905	30.7695	-0.104914	40.4038	38.7971	-0.058542	26.7286	24.0301	-0.153542	0.3931	0
CMYA5	chr2:23318522-23416856	1.3454	1.28593	-0.0652191	1.11748	0.947939	-0.237387	1.20429	1.0472	-0.201649	1.2596	1.01351	-0.313615	1.23501	1.07422	-0.201245	0.3931	0
KBTBD3	chr8:858329-881947	9.53174	8.77131	-0.119947	8.28814	7.13708	-0.215716	10.8799	10.2665	-0.0837238	11.0542	9.08757	-0.282629	9.90538	8.74432	-0.179866	0.3932	0
OASL	chr12:42956465-42969826	1.34174	1.44944	0.111391	1.55443	0.970228	-0.679986	2.22082	2.35432	0.0842167	4.60071	3.15851	-0.542615	2.38389	1.93268	-0.302714	0.39345	0
GUCY2F	chrX:36367527-36469112	10.47	10.1601	-0.0433563	11.9514	8.58738	-0.476891	5.8677	10.6951	0.866087	11.9284	7.07109	-0.754394	10.1546	9.12257	-0.154618	0.39385	0
SLC7A4	chr11:85426545-85430217	7.20775	8.8926	0.303057	8.41151	8.96308	0.0916284	7.27593	7.43517	0.0312336	6.87407	8.60621	0.324214	7.47849	8.48173	0.181612	0.394	0
SEMA6C	chr2:190065657-190079268	20.9299	19.9924	-0.0661099	24.9411	20.8616	-0.257676	26.3917	32.421	0.296842	46.5911	35.9054	-0.375852	29.4338	26.8143	-0.134471	0.39405	0
ABHD1	chr6:25401685-25410487	3.29853	9.19467	1.47897	6.89052	8.24098	0.258203	7.95559	9.84626	0.307607	8.70908	7.92476	-0.136153	6.63271	8.77677	0.404091	0.39415	0
STAR	chr16:70642579-70647203	0.923629	0.698296	-0.403475	1.90043	1.2467	-0.608211	1.43916	1.05714	-0.445056	1.31145	1.1895	-0.140804	1.39647	1.04002	-0.425171	0.39425	0
TPT1	chr15:56752359-56755291	434.227	515.56	0.247691	488.375	522.31	0.0969171	795.465	802.145	0.0120649	671.01	783.614	0.223809	590.614	646.04	0.129408	0.39425	0
CHRM1	chr1:211351737-211353120	2.42455	3.57118	0.558681	3.41904	4.03767	0.239933	2.71153	2.94215	0.11776	2.23351	2.7543	0.302369	2.71407	3.34646	0.302181	0.39445	0
SRRM3	chr12:21926405-22005681	25.1536	24.9582	-0.0112507	29.5293	25.917	-0.188247	29.6838	29.2389	-0.021788	33.9954	28.6454	-0.247035	29.5357	27.0171	-0.128583	0.3947	0
VPS9D1	chr19:53560827-53574504	14.5088	15.2747	0.0742154	16.7799	14.2443	-0.236344	18.2926	16.5548	-0.144014	18.9896	16.0204	-0.245297	17.0965	15.4416	-0.146871	0.3948	0
RGD1566239	chr16:19428803-19431276	9.51198	13.5078	0.505978	11.7197	11.5835	-0.0168669	13.7447	17.206	0.324037	12.2613	14.896	0.280817	11.7635	14.1604	0.267542	0.39495	0
XYLT2	chr10:83297805-83311288	26.768	25.3619	-0.0778452	25.1924	23.0177	-0.130244	27.5194	24.0709	-0.193159	25.4538	23.828	-0.0952224	26.279	24.0229	-0.1295	0.39515	0
COX5A	chr8:61264886-61276382	105.888	123.767	0.225083	122.054	133.238	0.126475	172.222	183.382	0.0905835	180.219	199.257	0.144875	143.662	157.62	0.13377	0.3952	0
AURKC	chr1:65242015-65244450	2.53024	2.48278	-0.027317	5.25589	2.43936	-1.10743	9.52062	8.3903	-0.182334	10.5002	8.94476	-0.231301	6.79242	5.36365	-0.340711	0.3955	0
CYP27A1	chr9:74039203-74068648	3.09815	3.23706	0.0632779	1.48292	3.77056	1.34634	5.15735	3.83654	-0.426826	3.52059	4.87623	0.469949	3.26304	3.89446	0.255207	0.39555	0
FBRSL1	chr12:46376297-46466040	18.17	14.851	-0.290997	17.7668	17.1403	-0.0517839	16.414	16.1094	-0.027024	17.1195	15.6236	-0.131915	17.445	15.8931	-0.134412	0.3956	0
FSD1L	chr5:71073343-71150183	5.55878	5.28457	-0.0729841	5.12589	4.1561	-0.30257	4.76376	5.99636	0.331988	7.20956	5.0415	-0.516059	5.66517	5.08468	-0.155961	0.3957	0
KIF27	chr17:12230380-12301010	0.89994	0.887755	-0.0196662	0.824206	0.528155	-0.642042	1.15221	0.80468	-0.51792	0.972268	0.924163	-0.0732066	0.958468	0.78019	-0.296904	0.39575	0
CACNG7	chr1:64112936-64140517	72.8833	67.5829	-0.108931	71.6054	73.1891	0.0315591	87.4651	85.1793	-0.0382041	94.3616	68.7881	-0.456041	81.2565	73.294	-0.148788	0.3965	0
TCTEX1D1	chr5:123913158-123928262	0.920889	0.621564	-0.567124	0.124755	0.332944	1.41618	0.540182	1.38999	1.36356	0.379591	0.689493	0.861093	0.495029	0.739882	0.579784	0.3967	0
CTTNBP2	chr4:44114096-44277748	21.047	19.3543	-0.12096	20.4914	18.614	-0.138628	23.1016	21.1765	-0.125531	18.5717	17.404	0	20.8418	19.0823	-0.127248	0.39685	0
SLC15A2	chr11:65819538-65849930	4.38282	3.40643	-0.363599	3.62365	3.92389	0.114841	4.36834	5.3164	0.283363	4.7491	7.08419	0.576947	4.27709	4.84412	0.179605	0.39705	0
PXDN	chr6:47878702-47914112	4.47752	3.59031	-0.318593	4.63388	3.68528	-0.330447	5.60016	5.62597	0.00663381	5.33122	9.97037	0.903182	4.9959	5.57998	0.159513	0.3972	0
TSSK6	chr16:20009496-20010939	2.41074	3.25852	0.434739	2.66371	3.28075	0.300589	1.31021	1.43922	0.13548	1.2537	1.86142	0.570206	1.9494	2.5032	0.360744	0.3973	0
CHRNA7	chr1:117587113-117716317	13.485	13.8285	0.0362912	11.1474	13.9436	0.322894	3.51325	5.5223	0.652465	4.01853	3.67323	-0.129617	8.30776	9.4997	0.193422	0.3974	0
SLC6A7	chr18:56958964-56977159	3.21322	4.08609	0.346703	2.4598	3.19485	0.377204	3.17042	3.78589	0.25596	3.82009	3.74026	-0.030466	3.15695	3.6906	0.225325	0.3974	0
TDP2	chr17:47290529-47301849	15.1083	12.3076	-0.295795	14.7302	13.7547	-0.0988567	24.3091	22.3876	-0.118793	24.4777	22.682	-0.109921	19.434	17.451	-0.155273	0.3975	0
CSTF3	chr3:89919337-89996188	17.2865	9.67678	-0.837048	13.8522	14.431	0.0590568	18.2387	13.2577	-0.460175	21.638	20.8704	-0.0521129	17.683	14.3679	-0.299518	0.3979	0
PLRG1	chr2:174780414-174796746	29.3898	26.9322	-0.125985	30.2387	24.9399	-0.277937	34.717	30.666	-0.179003	33.1686	33.844	0.0290782	31.8323	28.8392	-0.142458	0.3979	0
ICOSL	chr20:10944444-10954652	1.20555	1.46509	0.281301	0.869089	1.79191	1.04392	1.59655	1.2521	-0.350611	1.03201	1.40053	0.440516	1.16998	1.48254	0.341586	0.39795	0
DHRS1	chr15:33900693-33907979	6.27639	4.61022	-0.4451	5.97519	4.11491	-0.538125	11.7264	9.76637	-0.263863	10.4001	11.5894	0.156215	8.47195	7.31279	-0.212272	0.398	0
ZFP40	chr1:61142451-61164961	6.66271	6.69211	0.00635342	6.49582	5.54562	-0.228164	10.0598	10.0135	-0.00665487	9.44831	7.02425	-0.427712	8.09457	7.22953	-0.163052	0.39825	0
IRGM	chr10:34132511-34140450	3.46689	3.97365	0.19682	2.6967	4.44322	0.72041	5.77672	4.99267	-0.210438	4.76374	6.05061	0.344986	4.12252	4.81334	0.223512	0.39845	0
AKAP8	chr7:12873302-12889333	32.8291	32.4721	-0.0157738	38.5234	34.8302	-0.145397	43.3482	40.9975	-0.0804388	47.2056	41.0641	-0.20108	40.2996	37.0248	-0.122271	0.3986	0
SERTAD3	chr1:82553825-82557545	2.65955	2.45019	-0.118291	1.94736	3.31834	0.768939	2.61376	3.36552	0.364703	3.35943	3.93995	0.229961	2.63431	3.23629	0.296915	0.39865	0
SLITRK6	chr15:95106363-95112983	10.9001	10.5275	-0.0501799	11.0391	10.2307	-0.109709	14.8428	13.3172	-0.156467	12.843	11.1432	-0.204824	12.3495	11.2213	-0.138214	0.39875	0
NR2C1	chr7:31293166-31346649	19.7435	17.349	-0.186524	18.9602	17.1557	-0.144283	20.8826	21.1544	0.0186595	23.9978	20.2998	-0.241439	20.8651	18.8392	-0.147349	0.3988	0
ST3GAL5	chr4:105373384-105432196	39.0513	43.4296	0.15331	42.502	48.5488	0.191905	42.4693	42.3625	-0.00363272	33.4697	41.5873	0.313288	39.5245	43.9902	0.154435	0.3988	0
FOXRED2	chr7:115859068-115874842	9.27261	10.2298	0.141736	8.32825	10.3885	0.318903	7.6639	7.52953	-0.0255193	5.92906	7.62235	0.362433	7.8718	9.00356	0.193802	0.39895	0
UNC5C	chr2:239365108-239721231	10.9441	12.6973	0.21437	9.97559	11.9955	0.26602	14.5416	15.1607	0.0601536	12.2939	12.2076	-0.0101608	11.8795	12.9437	0.123777	0.39905	0
FBXO36	chr9:84085585-84164927	2.45124	2.64702	0.110856	2.37809	1.99013	-0.256939	1.80474	3.77211	1.06358	3.90431	5.37103	0.460131	2.63272	3.37035	0.356345	0.39935	0
FAM102B	chr2:204567963-204623194	12.6202	11.62	-0.119119	11.8597	11.2107	-0.0811968	15.2515	12.3781	-0.301156	10.0865	10.3401	0.0358236	12.4622	11.3616	-0.133394	0.3994	0
N6AMT2	chr15:36589141-36606136	10.3978	10.6038	0.0282921	11.437	13.3621	0.224444	18.0201	20.3134	0.17282	14.8071	20.1494	0.444453	13.5334	15.8148	0.224756	0.39965	0
FSD1	chrUn:25767742-25777547	21.5878	17.3604	-0.314412	21.5097	18.3964	-0.225564	18.531	17.1394	-0.112624	16.8967	15.7975	-0.0970532	19.7838	17.1728	-0.204195	0.3998	0
INTS9	chr15:44305672-44389325	7.85042	7.53873	-0.0584479	8.29615	7.16531	-0.211411	10.078	9.03759	-0.157194	11.1525	9.67176	-0.205522	9.29565	8.27365	-0.168032	0.3999	0
OAZ2	chr8:69934993-69948825	21.0823	20.3134	-0.053599	22.1353	23.1927	0.0673208	16.1438	18.0776	0.163215	24.951	33.1142	0.40835	21.175	23.5025	0.150457	0.39995	0
LOC288978	chrUn:57444957-57510537	0.885981	0.744238	-0.251512	0.746399	0.94911	0.34663	1.52957	2.24682	0.554756	1.47482	2.37894	0.689782	1.14247	1.5314	0.42269	0.4001	0
PLSCR4	chr8:97428402-97466096	5.54974	3.90509	-0.507066	4.5699	5.10532	0.159837	4.92363	3.25109	-0.598802	2.74481	2.79876	0.0280815	4.4893	3.79874	-0.24097	0.40085	0
GPR27	chr4:134541533-134542667	4.62975	2.75528	-0.748739	2.14888	2.45958	0.194825	0.447625	0.936271	1.06463	2.36459	1.35849	-0.799588	2.46708	1.91767	-0.363449	0.401	0
GHR	chr2:52496516-52658066	8.78947	7.47043	-0.234586	8.10342	6.45951	-0.327106	8.87305	8.33963	-0.0894465	7.58549	7.74438	0.0299082	8.36208	7.45436	-0.165777	0.40115	0
CBFA2T3	chr19:52904000-52980399	10.9667	10.7642	-0.026897	13.0778	11.7253	-0.157498	11.3216	9.5914	-0.239262	10.5352	8.6746	-0.280342	11.5293	10.2265	-0.172999	0.4013	0
SLC28A2	chr3:109350530-109372027	1.04101	0.95425	-0.12554	1.19317	0.638711	-0.90156	3.80446	2.70346	-0.492883	2.59414	2.96118	0.190918	2.10133	1.74911	-0.264674	0.40135	0
MAP2K7	chr12:1543327-1552523	63.4093	58.3974	-0.118792	71.2904	61.6824	-0.20885	52.9635	51.3963	-0.0433354	55.5023	47.243	-0.232449	61.304	54.8664	-0.160059	0.4015	0
SRSF6	chr3:153795473-153800796	50.3763	45.5896	-0.144042	56.6283	46.1685	-0.294614	82.365	81.9707	-0.00692193	102.06	90.836	-0.168081	71.9593	64.7604	-0.152069	0.40155	0
IDH2	chr1:135876053-135895400	32.6446	32.0268	-0.0275649	33.1226	35.8301	0.113356	34.0654	35.1474	0.0451132	32.2761	43.9909	0.44674	33.093	36.4876	0.140878	0.4016	0
MVB12A	chr16:18726944-18731772	10.546	11.7246	0.152845	11.5369	12.56	0.122588	22.1605	22.9136	0.048216	19.0497	25.7783	0.436393	15.5807	17.8313	0.194653	0.402	0
MCM7	chr12:17607240-17614555	14.1825	13.3755	-0.0845163	16.5329	14.7147	-0.168081	16.7264	14.817	-0.174879	16.2911	14.6866	-0.149589	15.9343	14.3405	-0.152041	0.40235	0
ABCC5	chr11:82714282-82809354	29.7984	26.8772	-0.148848	31.6496	28.9561	-0.128322	42.7692	40.0652	-0.0942241	45.5616	37.8681	-0.266837	37.154	33.0237	-0.170015	0.40255	0
ZRANB3	chr13:40648237-40803092	3.11451	2.57151	-0.276385	2.38015	2.19722	-0.115373	2.19536	1.89721	-0.210574	2.61808	2.18611	-0.26014	2.59467	2.21878	-0.225785	0.40255	0
CNOT10	chr8:119006228-119057213	26.4606	23.9517	-0.143717	28.5252	24.0117	-0.248497	27.2096	26.985	-0.0119582	27.5442	26.0071	-0.0828384	27.5012	25.102	-0.131691	0.40305	0
RGL1	chr13:67468217-67754947	17.6832	15.754	-0.166664	17.4363	15.5172	-0.168219	15.9324	12.901	-0.304482	11.711	13.1825	0.170762	15.8261	14.3833	-0.13791	0.40315	0
NUP37	chr7:24847156-24875363	4.6881	4.01281	-0.224392	6.15543	4.26034	-0.530889	9.69779	8.23483	-0.235917	7.9787	7.74049	-0.0437284	7.04404	5.93036	-0.248282	0.4033	0
CRH	chr2:104764022-104765887	0.882033	1.23846	0.489637	1.71908	1.78583	0.0549621	1.67635	2.8324	0.756707	1.84618	2.14285	0.214987	1.52067	1.9645	0.369455	0.40335	0
RNF123	chr8:113317162-113347147	32.0872	29.0501	-0.143455	33.6574	31.7792	-0.0828411	35.4565	34.7941	-0.0272075	36.9876	31.4896	-0.232164	34.5348	31.6143	-0.127475	0.4035	0
DES	chr9:74637790-74645498	0.390344	0.421685	0.111421	0.656451	0.669065	0.0274596	2.25491	2.20349	-0.0332771	3.05694	1.75311	-0.802168	1.53399	1.21495	-0.336391	0.40375	0
CABP5	chr1:73984989-73998011	48.0332	46.4893	-0.0471354	51.1127	44.5118	-0.199493	45.576	42.6911	-0.0943404	42.3636	37.6552	-0.169977	47.0313	42.8967	-0.132755	0.40385	0
LDLRAD4	chr18:64755403-64954896	13.2271	12.8012	-0.0472151	12.6334	11.0992	-0.186785	13.894	13.2428	-0.0692543	11.9603	9.08396	-0.396857	12.9562	11.5541	-0.165241	0.4039	0
FBXO16	chr15:44690041-44736309	3.3552	2.81849	-0.251478	1.11025	3.774	1.76521	5.86966	6.46882	0.140225	4.66835	5.29308	0.181194	3.67377	4.49755	0.291876	0.40405	0
CNIH	chr15:22632679-22644616	42.2979	46.7227	0.143537	43.1395	49.3581	0.194276	69.0268	74.6552	0.113086	72.0357	79.0504	0.134061	55.9723	61.4237	0.134084	0.4041	0
PLA2G2C	chr5:157536545-157555895	2.75394	3.09631	0.169052	2.37074	2.601	0.133733	1.47153	2.05158	0.47942	1.29447	2.03939	0.655782	2.01108	2.46627	0.294365	0.40425	0
BCAP29	chr6:49464361-49504424	16.1763	17.1718	0.0861594	15.5586	15.7582	0.0183839	18.4753	20.3474	0.139249	16.5706	21.9122	0.40311	16.6846	18.6142	0.157892	0.40445	0
NUP160	chr3:75041872-75102540	5.51556	5.88892	0.0944943	5.79348	4.86533	-0.251891	6.7469	6.34163	-0.0893703	7.82811	6.30032	-0.313238	6.44171	5.80813	-0.149371	0.40455	0
EXTL1	chr5:153100522-153116494	2.77513	2.28634	-0.279511	2.22309	3.01393	0.43908	2.2328	2.8654	0.35988	2.08905	2.87647	0.461456	2.34561	2.74611	0.227429	0.4053	0
SLC10A4	chr14:37602867-37608838	15.2051	11.6079	-0.389456	14.3351	12.5408	-0.192923	12.7393	12.9074	0.0189099	11.644	10.7802	-0.111207	13.585	11.9352	-0.186791	0.40555	0
MSC	chr5:3702999-3705056	0.9399	0.767462	-0.292413	0.882388	2.27456	1.3661	0.859383	1.00983	0.232738	0.340705	0.411899	0.273765	0.765192	1.13506	0.568872	0.4058	0
MAPKAPK3	chr8:112497623-112531895	5.72849	6.98599	0.28631	6.45727	6.60743	0.0331655	7.38593	8.05396	0.124917	5.67663	7.13402	0.329681	6.31009	7.1543	0.181149	0.406	0
HINFP	chr8:47275014-47284379	10.5292	10.3679	-0.0222785	11.2334	9.20842	-0.286766	9.54509	8.90745	-0.0997463	10.6718	8.85752	-0.268827	10.5432	9.34218	-0.174477	0.40615	0
RAB1B	chrX:73108016-73109840	30.0879	35.13	0.223517	32.2575	36.6145	0.182783	48.7524	49.8574	0.0323353	48.4956	53.7794	0.149201	39.4925	43.2573	0.131367	0.4064	0
IP6K2	chr8:113833025-113861895	39.0548	36.0631	-0.114973	44.9663	43.1496	-0.0594979	58.1885	54.358	-0.0982405	72.5307	63.7664	-0.185796	53.1697	48.6208	-0.12903	0.40675	0
RYR3	chr3:98475884-98870218	2.18715	2.09785	-0.0601399	2.18885	2.15832	-0.0202678	2.78114	2.70643	-0.0392835	2.8669	2.09729	-0.450965	2.49401	2.25096	-0.147929	0.40705	0
SIAH3	chr15:56320597-56387573	17.4866	16.0004	-0.128141	17.5283	14.4216	-0.281452	15.266	11.2461	-0.440894	10.069	10.229	0.0227426	15.2504	13.0806	-0.221417	0.40735	0
RS1	chrX:55242653-55266249	223.939	221.222	-0.017615	264.308	196.269	-0.42939	98.2277	148.964	0.600762	199.947	158.43	-0.335775	199.934	182.494	-0.131673	0.4075	0
C030046E11RIK	chr1:233219062-233322775	16.5061	15.2153	-0.117471	15.178	13.6491	-0.153175	13.7387	13.8725	0.0139742	15.3762	13.2389	-0.215916	15.2775	13.9892	-0.127093	0.4077	0
CHST7	chrX:13817185-13853707	0.682943	0.326594	-1.06427	1.26124	0.916095	-0.461267	0.669375	0.518342	-0.368909	0.485127	0.605292	0.31927	0.786617	0.591074	-0.412322	0.40775	0
GAB1	chr19:28979703-29088877	11.4467	12.7589	0.156579	11.8834	12.2529	0.0441737	18.1847	17.8771	-0.024613	12.8137	17.1328	0.419077	13.4935	14.819	0.135174	0.40795	0
GM608	chr11:58035312-58095439	4.40699	3.66958	-0.26418	3.99624	3.41787	-0.225545	3.39622	4.02179	0.243906	3.55735	2.90942	-0.290072	3.86982	3.49864	-0.145476	0.408	0
HIST2H2BE	chr2:191023463-191045409	3.53836	3.94358	0.156425	4.37375	3.73639	-0.227226	3.71507	3.09714	-0.262456	4.5516	2.73184	-0.736499	4.04986	3.39733	-0.253471	0.40815	0
PTRHD1	chr6:27210614-27214000	4.15956	5.44465	0.388409	3.96309	5.83317	0.557654	6.05364	5.77251	-0.0686025	6.29945	7.69558	0.288803	5.07159	6.13866	0.275484	0.40835	0
TGFBI	chr17:13904881-13935110	0.895761	0.818842	-0.129528	1.00536	0.498259	-1.01274	1.82279	1.10899	-0.71691	1.72672	2.01813	0.224983	1.34207	1.08188	-0.310927	0.40835	0
GULP1	chr9:43660025-43797356	8.43811	7.94094	-0.0876102	8.3712	9.08902	0.11869	13.5708	14.4247	0.0880337	12.0304	16.2831	0.436692	10.4995	11.698	0.155943	0.40845	0
EPHA7	chr5:44728036-44878332	11.649	9.98973	-0.221693	11.3496	9.69623	-0.227149	10.0466	9.96761	-0.0113811	9.01502	8.53895	-0.0782725	10.5943	9.54306	-0.150772	0.4086	0
AMOTL1	chr8:11291639-11364415	3.76833	2.76652	-0.445854	2.94786	3.03938	0.0441064	3.93493	3.76869	-0.0622742	3.38505	3.06477	-0.143395	3.50872	3.13606	-0.16199	0.4087	0
PTPRF	chr5:138670943-138752763	39.9103	44.5713	0.159354	36.749	43.0002	0.22664	39.6065	37.9838	-0.0603522	34.21	38.3195	0.16366	37.742	41.0439	0.120998	0.40875	0
LSR	chr1:85993857-86009522	10.1056	9.50417	-0.0885226	10.486	12.051	0.200697	12.2164	14.2362	0.220739	13.9479	17.0604	0.290606	11.6404	13.0311	0.16282	0.4088	0
FAM98C	chr1:84265740-84289150	13.9846	14.1506	0.0170235	17.706	15.6588	-0.177267	23.4108	20.9969	-0.156994	28.2932	22.1561	-0.352747	20.6181	17.9933	-0.196458	0.40885	0
AMER1	chrX:82981289-83001966	5.04036	3.72585	-0.435954	4.28527	4.00502	-0.0975751	3.17187	3.03269	-0.0647346	2.84498	2.82042	-0.0125072	3.89216	3.41573	-0.188375	0.4089	0
TRADD	chr19:35073149-35075251	1.53812	1.99363	0.374234	1.66479	2.29858	0.465404	1.73173	2.18763	0.337158	2.074	2.40801	0.215431	1.74826	2.21166	0.339207	0.40905	0
TMEM63C	chr6:111159622-111223801	12.5582	11.4394	-0.134616	11.5993	11.0397	-0.0713452	12.6931	11.8507	-0.0990654	12.1359	10.1695	-0.255031	12.2662	11.1052	-0.143461	0.4091	0
COBL	chr14:93154636-93309406	11.4997	11.4006	-0.0124895	10.2366	12.8095	0.323479	14.3459	14.6702	0.0322499	12.1972	14.215	0.220872	12.0273	13.169	0.130838	0.40915	0
2900026A02RIK	chr12:44480137-44563585	6.56681	6.33215	-0.0524965	6.65505	6.41393	-0.0532404	6.56307	5.15563	-0.348224	5.43972	4.67709	-0.217924	6.33606	5.67492	-0.158986	0.40925	0
NAA35	chr17:10940982-10992992	58.7612	55.5998	-0.0797833	60.3886	64.9422	0.10488	66.7004	79.4408	0.252185	70.618	81.0822	0.199349	64.0163	69.4797	0.118152	0.40945	0
RGD1306001	chr7:123812742-123816570	1.77829	2.469	0.473439	2.47893	3.42895	0.468053	3.3029	4.00334	0.277471	3.12029	3.59199	0.203105	2.64429	3.33793	0.33607	0.40955	0
PRKX	chrX:63484553-63533858	7.1301	6.69653	-0.090508	7.63245	6.37305	-0.260163	7.98443	7.32905	-0.123564	7.30323	6.73202	-0.117495	7.52084	6.75174	-0.155633	0.40995	0
SMO	chr4:56622991-56646572	23.2596	24.4984	0.0748671	23.2567	25.6109	0.139112	16.0368	17.1341	0.0954876	13.0852	16.6956	0.351528	19.1962	21.1786	0.141786	0.4101	0
NFKBID	chr1:85374915-85383738	0.722156	1.09217	0.596816	1.50966	0.696265	-1.11651	1.53172	1.0136	-0.595656	1.52679	1.41848	-0.106157	1.3129	1.04365	-0.331117	0.4102	0
SIVA1	chr6:137631289-137635731	11.0151	7.9082	-0.47806	11.7553	10.7491	-0.129086	19.52	15.009	-0.379132	19.1525	19.2793	0.00951955	15.169	12.9656	-0.22644	0.41035	0
HRH3	chr3:169154978-169160064	13.7027	9.59787	-0.513671	13.2879	12.707	-0.0644919	11.9098	11.6759	-0.0286105	12.8354	12.0559	-0.0903993	12.9988	11.4555	-0.182338	0.4106	0
TSR3	chr10:14487945-14490508	10.7731	11.5601	0.101717	9.35701	11.9585	0.353912	12.7066	13.9905	0.138867	13.3069	15.2578	0.19737	11.4826	13.0734	0.187184	0.4107	0
BMS1	chr4:154687168-154725011	13.8051	13.5101	-0.0311577	14.703	12.2655	-0.261504	15.726	15.4972	-0.0211463	15.6821	13.6856	-0.196463	14.972	13.6565	-0.132676	0.4109	0
PTGS1	chr3:15343831-15365412	1.53809	1.30812	-0.233644	1.76834	2.08245	0.235885	3.85331	2.34004	-0.719563	2.29294	2.17457	-0.0764696	2.32483	1.95329	-0.251218	0.4109	0
LPAR1	chr5:76449469-76571458	0.542852	0.674455	0.313162	0.615884	0.758921	0.30129	0.777421	0.855506	0.138083	0.965855	1.36208	0.495932	0.71919	0.898755	0.321555	0.41105	0
MPHOSPH10	chr1:118815635-118832462	8.27876	6.63848	-0.318562	9.41137	7.40594	-0.345723	9.46935	9.24246	-0.0349895	9.61419	9.68968	0.0112838	9.19419	8.14949	-0.174013	0.41105	0
P2RY2	chr1:158440017-158454210	0.622589	1.39686	1.16584	0.621408	1.29288	1.05698	0.43066	0.522884	0.279942	1.19058	0.408516	-1.5432	0.714196	0.929819	0.380629	0.4111	0
PNOC	chr15:44822635-44835637	1.6252	0.877554	-0.889059	2.01304	0.895367	-1.16883	2.56699	2.62708	0.0333828	2.10426	1.99808	-0.0746965	2.06613	1.55233	-0.412499	0.4117	0
FST	chr2:46541089-46550822	1.01268	1.7366	0.778093	1.041	1.79105	0.78284	0.949437	2.54852	1.42452	2.68127	1.39627	-0.941336	1.40546	1.85676	0.401748	0.41175	0
AGTRAP	chr5:165154267-165164570	14.9513	14.4615	-0.0480577	13.7207	15.882	0.211039	9.55048	10.9044	0.191261	9.45118	12.5336	0.407234	12.0858	13.5159	0.161344	0.41185	0
ABCC8	chr1:96622474-96703802	3.75064	3.24316	-0.209736	3.39167	3.1859	-0.0902966	4.30567	3.58286	-0.265126	3.53606	3.21971	-0.135212	3.74384	3.2943	-0.184544	0.41215	0
NBEAL2	chr8:115005588-115035776	1.93191	1.86596	-0.050108	2.07567	1.79682	-0.208128	2.20634	2.21044	0.00267532	2.54161	1.93839	-0.390886	2.18403	1.94089	-0.170271	0.4123	0
CASP8	chr9:57389352-57437803	1.08757	1.02163	-0.0902386	0.613536	0.729448	0.249656	1.11242	0.590201	-0.914416	1.01375	0.586879	-0.788563	0.953455	0.739425	-0.366762	0.41235	0
PRDM9	chr1:54432712-54452679	0.644605	0.843001	0.387118	1.09999	0.883181	-0.316716	0.944962	1.17228	0.310986	2.1408	0.954188	-1.1658	1.19321	0.954664	-0.321781	0.41265	0
GBX2	chr9:89034341-89037102	1.63884	1.343	-0.287215	1.58919	1.41662	-0.165843	1.94658	2.15031	0.143602	2.50629	1.30868	-0.937442	1.90855	1.53994	-0.309605	0.4129	0
ZFP653	chr8:21161792-21180092	6.94427	7.09501	0.0309815	8.02945	7.64323	-0.0711187	8.83706	7.46171	-0.244061	10.3814	7.85848	-0.401685	8.50957	7.48702	-0.184694	0.41325	0
ANXA1	chr1:223478435-223494455	1.17031	1.02709	-0.188336	1.10821	1.05782	-0.0671402	6.79973	10.8167	0.669718	13.6529	14.5521	0.0920208	5.4516	6.49643	0.252967	0.4133	0
CACNB2	chr17:88853245-89078871	30.0289	26.5238	-0.179067	28.7792	25.3403	-0.183591	29.7858	32.5108	0.126293	40.1308	35.0303	-0.196104	32.1223	29.5458	-0.120624	0.414	0
PAQR6	chr2:180478308-180482234	1.08635	0.642702	-0.757264	1.17829	1.20778	0.0356516	0.730201	1.6643	1.18855	0.690809	1.63592	1.24374	0.935412	1.26178	0.431782	0.4141	0
PAPOLG	chr14:104800057-104833509	4.99025	4.85227	-0.0404525	5.51975	5.0405	-0.131038	8.54653	6.8086	-0.32798	7.74983	7.33593	-0.0791847	6.63276	5.93058	-0.161435	0.41415	0
EPHB1	chr8:106871855-107328156	7.05352	7.09094	0.007632	6.80434	7.67353	0.173435	4.60318	6.38699	0.472505	6.28402	6.55058	0.0599343	6.24702	6.93569	0.150871	0.4142	0
GPR125	chr14:65770082-65872889	6.28719	6.71119	0.0941533	7.70794	7.6373	-0.013282	8.4659	7.99266	-0.0829891	5.75716	9.30817	0.693141	7.06061	7.8478	0.152495	0.41425	0
PRKAG2	chr4:5620991-5667438	8.50978	7.73677	-0.137391	8.69865	7.67667	-0.18031	9.81806	10.2798	0.0662991	11.9945	9.17518	-0.386571	9.71705	8.63485	-0.170346	0.41425	0
POU6F2	chr17:54329458-54802174	3.64726	4.67317	0.357588	3.02599	3.55739	0.233412	1.61768	1.35973	-0.250603	1.09422	1.68214	0.620393	2.40801	2.89167	0.264063	0.41455	0
KIF26A	chr6:136947393-137008524	3.24169	3.65686	0.173857	3.15504	3.53766	0.165141	1.93727	2.97588	0.619289	2.70277	2.35595	-0.198128	2.79245	3.1522	0.174828	0.4146	0
EDN3	chr3:166491367-166514051	1.56319	1.87522	0.262564	1.88618	1.84197	-0.0342165	1.02051	0.764986	-0.41578	0.415687	2.39878	2.52873	1.25129	1.72514	0.463292	0.4149	0
TWSG1	chr9:104694730-104729090	48.3029	64.2561	0.411724	61.4249	60.9346	-0.0115627	29.3279	35.0737	0.258115	29.1132	38.0496	0.386209	42.854	50.2536	0.229799	0.4149	0
IGSF9B	chr8:26905722-26952337	6.08022	5.77716	-0.0737635	6.00766	4.90735	-0.291861	3.21467	3.63865	0.178736	2.85872	1.78557	-0.678983	4.63611	4.09776	-0.17808	0.41505	0
TRIM27	chr17:51192590-51204942	18.9485	22.1348	0.224228	20.4378	23.0332	0.172472	20.8148	20.9552	0.00969829	20.5103	23.0211	0.166607	20.1955	22.2501	0.139774	0.41545	0
DUSP23	chr13:88636757-88638904	12.1353	9.75479	-0.315028	13.2888	10.6099	-0.324791	14.2274	8.7065	-0.708508	7.06134	8.1494	0.206752	11.7486	9.33358	-0.331985	0.4155	0
PLA2G4A	chr13:64135729-64280815	3.71485	4.29012	0.207711	4.60295	4.26097	-0.111376	5.20053	6.06668	0.222249	4.87756	6.58678	0.433414	4.58299	5.22669	0.189609	0.4158	0
DOS	chr7:11078876-11103522	18.278	14.9694	-0.288092	14.3347	16.3416	0.189031	29.9992	22.178	-0.435798	30.73	21.1944	-0.535964	22.9971	18.4409	-0.318545	0.41635	0
PAFAH1B3	chr1:80570159-80572738	16.7659	19.885	0.246154	17.1501	17.4747	0.0270533	25.8999	25.2136	-0.0387453	17.4491	26.5395	0.604992	19.2099	22.0117	0.19642	0.41645	0
ATP5H	chr10:105494351-105499413	223.289	277.173	0.311874	308.306	304.813	-0.0164404	240.203	268.518	0.160769	255.592	278.135	0.121947	257.886	281.979	0.12885	0.4166	0
GAS7	chr10:54249338-54403868	28.6971	25.9038	-0.147743	29.129	26.8188	-0.119211	32.6338	30.6748	-0.089313	31.9284	30.3708	-0.0721551	30.5717	28.2466	-0.114118	0.41665	0
CCDC77	chr4:156704406-156726949	9.2926	9.54927	0.0393083	9.55442	8.26748	-0.208722	14.3092	13.057	-0.132121	13.9431	11.5448	-0.272313	11.6677	10.4782	-0.155136	0.41745	0
LRRFIP1	chr9:90225045-90357403	12.1987	10.0031	-0.28628	11.5377	10.4011	-0.149614	11.457	11.7073	0.0311855	11.3063	9.8284	-0.202101	11.6669	10.4415	-0.160103	0.4175	0
EME2	chr10:14140950-14144076	16.8152	14.4531	-0.218387	17.5772	14.6944	-0.258435	10.9152	13.0166	0.254011	13.4894	10.3021	-0.388893	14.8806	13.1719	-0.175973	0.41755	0
VIPR2	chr6:143347747-143416680	40.1118	36.3332	-0.142739	41.3598	38.0593	-0.119981	42.1368	38.8188	-0.118325	38.3543	36.9202	-0.0549781	40.5913	37.4193	-0.117388	0.4177	0
CNN3	chr2:218044796-218075923	106.819	110.201	0.0449678	99.9813	121.777	0.284515	166.648	147.697	-0.174164	109.182	145.398	0.413274	119.852	130.011	0.117385	0.41775	0
HIP1	chr12:22287860-22422163	13.6006	15.2946	0.169347	13.5137	14.8192	0.133046	13.8297	15.3293	0.148524	14.2054	14.723	0.051631	13.8079	15.007	0.120148	0.41775	0
CSPG4	chr8:60610834-60645877	0.642183	0.659726	0.0388816	0.682121	0.883075	0.37251	1.32699	1.62283	0.290358	1.32898	1.50755	0.181882	0.978417	1.14111	0.221917	0.4178	0
KIF13B	chr15:44011577-44167269	8.12384	7.01966	-0.21076	7.47977	7.18976	-0.057051	6.79164	6.79577	0.000876285	6.44229	5.17923	-0.314836	7.26035	6.56335	-0.145608	0.4179	0
EHD2	chr1:76291270-76310660	3.54243	3.42394	-0.04908	3.47784	4.62898	0.4125	4.51828	5.7857	0.356718	4.56343	5.06677	0.150949	4.0059	4.67056	0.221469	0.41805	0
FTL1	chr13:86732193-86733115	6.20484	6.427	0.0507507	4.66794	8.79016	0.913105	16.4666	17.0125	0.0470531	13.7938	16.1174	0.224606	10.0281	11.7831	0.232663	0.41825	0
ANXA4	chr4:120889616-120947662	1.9902	1.62557	-0.291969	2.04703	2.48046	0.277074	3.9609	4.88182	0.30159	4.65872	6.20876	0.414371	3.10782	3.68363	0.245226	0.41845	0
MYSM1	chr5:115245477-115282352	6.06473	6.19787	0.0313277	6.466	5.45553	-0.245153	6.81851	6.66479	-0.0328975	6.93953	5.52487	-0.328898	6.57003	5.93916	-0.145641	0.41845	0
NUPL2	chr4:6352148-6369568	6.47734	6.46561	-0.00261436	7.77933	6.09905	-0.351062	8.87211	8.49078	-0.0633803	9.08098	7.64846	-0.24768	8.01762	7.10505	-0.174329	0.41845	0
TRHR2	chr19:52624098-52627808	1.69379	1.93692	0.193512	1.18717	1.92121	0.694493	0.538172	1.36363	1.34132	1.32592	1.05274	-0.332838	1.20584	1.58658	0.395882	0.41855	0
STARD8	chrX:87088564-87102511	2.11405	2.40219	0.184343	1.94889	2.03828	0.0646965	2.35262	2.26472	-0.0549383	1.43122	2.41225	0.753134	1.96865	2.27096	0.206096	0.4186	0
MOB1B	chr14:20911002-20944224	23.6213	21.9964	-0.102824	23.2373	21.3511	-0.122134	19.4986	20.3875	0.0643187	20.437	15.6768	-0.382552	21.851	19.9148	-0.13386	0.41865	0
TMEM116	chr12:36176675-36209125	5.61266	5.17072	-0.118319	5.18252	3.66062	-0.501566	5.28023	5.56879	0.0767647	9.22119	7.16478	-0.364031	6.29502	5.32232	-0.242154	0.41865	0
UNC5B	chr20:28092621-28162619	13.081	13.9491	0.0926991	10.2194	12.2849	0.26557	6.76085	8.54216	0.337396	6.75406	6.58688	-0.0361586	9.3688	10.4859	0.162507	0.41875	0
ZBTB8OS	chr5:148492933-148503437	3.51705	3.34994	-0.0702314	5.17332	3.98911	-0.375021	12.377	8.82329	-0.488272	9.56259	8.87617	-0.107464	7.47902	6.08707	-0.297101	0.4188	0
RHBDF2	chr10:106715038-106742165	4.14284	4.14461	0.000613829	3.95116	4.73404	0.260796	5.1806	5.5862	0.108748	4.06556	5.31823	0.387494	4.32687	4.90228	0.180129	0.41905	0
CHST2	chr8:100494449-100501506	58.6947	63.3672	0.110504	56.3028	67.8645	0.269451	66.7775	67.5863	0.0173671	58.1035	70.8269	0.285671	59.9559	67.1354	0.163171	0.41915	0
ENGASE	chr10:108478621-108491272	8.06281	9.66829	0.261978	8.92581	10.3793	0.217657	7.87966	7.66406	-0.0400255	6.65248	7.19236	0.112575	7.93021	8.78229	0.147238	0.41915	0
GRK1	chr16:80979322-80991796	179.33	175.894	-0.0279109	207.22	169.136	-0.292985	84.3117	122.867	0.543291	169.489	126.015	-0.427602	162.496	149.588	-0.119414	0.4194	0
TMEM252	chr1:228097428-228102637	0.526084	0.45464	-0.210568	0.625828	1.21733	0.959883	0.326784	0.695837	1.09041	0.809502	0.691791	-0.226698	0.574488	0.766159	0.415367	0.4194	0
PRRT2	chr1:186195707-186199436	15.4333	13.7745	-0.164046	17.5174	16.0606	-0.125258	26.1628	23.1873	-0.174181	22.6504	21.787	-0.0560667	20.2536	18.4247	-0.13654	0.41945	0
BAIAP2L1	chr12:10584748-10668948	0.818655	0.486418	-0.751059	0.619487	0.868236	0.487013	1.44879	1.85789	0.358809	1.83219	2.7399	0.580552	1.15739	1.43525	0.310434	0.41955	0
NMNAT2	chr13:67969421-68147479	32.8523	30.4588	-0.109133	31.1349	25.165	-0.307114	19.3778	17.9551	-0.110006	17.391	14.9163	-0.221444	25.6346	22.422	-0.193173	0.4198	0
GCOM1	chr8:75970990-76058808	0.810386	0.322536	-1.32915	0.368882	0.575719	0.642205	1.50841	0.733685	-1.0398	0.476799	0.829175	0.798297	0.779983	0.603396	-0.370337	0.41985	0
ETV6	chr4:170909002-171153794	5.58794	7.73084	0.468308	5.67401	6.34238	0.160656	6.54828	6.50484	-0.00960386	5.27385	6.06292	0.201155	5.77401	6.6691	0.207919	0.41995	0
TRAPPC13	chr2:35067975-35100692	30.3388	29.0396	-0.0631402	35.9109	29.3921	-0.288994	43.5255	41.5842	-0.0658236	43.2862	40.4824	-0.0966128	38.0556	34.6822	-0.133915	0.41995	0
WAS	chrX:26436291-26444997	1.89956	3.44697	0.859667	1.56251	1.90469	0.285694	2.4897	1.81169	-0.458638	1.53765	2.14803	0.482291	1.86723	2.34588	0.329224	0.42015	0
DEF8	chr19:53765016-53781292	21.0471	18.129	-0.215325	23.5163	19.9613	-0.236452	23.2086	23.2236	0.000933507	23.6887	23.0633	-0.0386014	22.8839	20.917	-0.129659	0.42035	0
PRPF38B	chr2:204509109-204518135	28.1769	29.2039	0.0516501	31.8813	26.3823	-0.27314	35.5277	33.5504	-0.0826136	37.7004	33.9717	-0.150246	33.2127	30.5277	-0.121615	0.42035	0
ADAM8	chr1:199780002-199792742	0.552771	0.564011	0.0290426	1.19469	0.680999	-0.810915	2.05601	2.22227	0.112188	2.97878	2.16299	-0.461694	1.65382	1.35653	-0.285879	0.42045	0
ARHGAP15	chr3:24256619-24868798	5.45418	3.35763	-0.699918	3.55248	2.99684	-0.245384	3.35005	3.41205	0.0264592	2.74759	3.07496	0.162398	3.82772	3.20114	-0.257902	0.42045	0
ZFP384	chr4:161129569-161158855	13.3623	11.6989	-0.191795	12.7457	12.3017	-0.0511504	20.2522	17.9731	-0.172241	22.2037	20.682	-0.102422	16.9536	15.405	-0.138196	0.42055	0
LAMC1	chr13:68241452-68369419	10.3428	9.8971	-0.0635533	8.88009	11.0264	0.312313	13.5645	13.8258	0.0275175	11.9284	14.1275	0.244111	11.1148	12.082	0.120387	0.42075	0
DAK	chr1:213081824-213095034	4.7248	5.82139	0.301111	4.81181	6.17429	0.359693	3.87873	4.0068	0.0468665	4.13893	4.13752	-0.00049362	4.42103	5.08065	0.200631	0.42095	0
APOL9A	chr7:115472724-115479486	1.13495	1.36218	0.263294	0.545703	0.790291	0.534269	2.1652	0.488054	-2.14939	1.39282	1.30961	-0.088872	1.28523	0.991738	-0.373995	0.42125	0
METTL7A	chr7:139062219-139062750	67.3078	55.3793	-0.281427	75.4425	63.1108	-0.25749	35.0068	32.2612	-0.117834	35.6094	39.1502	0.136762	54.4859	48.0636	-0.180939	0.4214	0
MLX	chr10:90104232-90112013	13.3602	11.9816	-0.157114	14.7744	12.7353	-0.214264	22.6757	20.9693	-0.112873	21.4475	19.4434	-0.14153	17.8752	16.0045	-0.159487	0.4215	0
ZFP668	chr1:187148887-187159858	3.41059	3.68387	0.111203	2.6247	3.53135	0.428068	3.63948	3.72309	0.0327687	3.34812	4.06935	0.281449	3.25031	3.73457	0.200367	0.42155	0
RBM41	chrX:127687340-127744248	5.09825	3.8159	-0.41798	4.46551	4.59421	0.0409922	3.99206	3.63842	-0.133821	4.14917	3.4114	-0.282459	4.45816	3.87498	-0.202259	0.4217	0
RGD1311188	chr7:113996965-114003913	5.41242	4.49751	-0.267148	6.52853	5.16819	-0.3371	5.24555	5.02234	-0.0627357	5.38492	4.99323	-0.108953	5.67372	4.90218	-0.210871	0.42175	0
GADD45B	chr7:10289072-10291102	8.44843	7.63357	-0.146325	7.47473	8.92863	0.256418	9.34885	13.0252	0.478443	9.76525	11.3273	0.214079	8.73678	10.0838	0.206865	0.422	0
CNTN3	chr4:137121005-137421081	4.23793	3.98045	-0.0904295	3.65796	4.20922	0.202516	4.14746	4.6451	0.163484	3.43143	4.74049	0.466228	3.88168	4.3649	0.169269	0.4221	0
KRTCAP2	chr2:181417283-181421280	28.823	36.9186	0.35713	31.5081	40.5687	0.364642	60.2017	59.006	-0.0289441	56.0332	65.6833	0.229245	43.438	49.7065	0.194475	0.4221	0
CLCN6	chr5:165077939-165110732	41.3888	41.579	0.00661603	44.1898	38.4032	-0.202486	29.6423	31.3045	0.0787117	34.3931	26.7181	-0.364303	37.8051	34.7539	-0.121404	0.42215	0
CNTN6	chr4:140078006-140450348	2.22953	1.44523	-0.625442	2.10795	2.09587	-0.00829089	3.09449	2.45864	-0.331846	2.94964	2.94888	-0.00037173	2.57712	2.20274	-0.226458	0.42215	0
SFXN5	chr4:119460106-119583363	52.6084	50.6322	-0.0552388	54.8323	48.3847	-0.180475	44.6821	37.316	-0.259904	40.2836	39.1233	-0.0421635	48.5233	44.104	-0.137769	0.42225	0
KLHL20	chr13:76655798-76700635	12.6375	10.9496	-0.206838	12.0148	10.4472	-0.201698	9.68666	9.4701	-0.0326194	9.44226	8.95311	-0.0767422	11.0503	9.97672	-0.147442	0.42235	0
ARGLU1	chr16:86143398-86181601	46.7917	46.5166	-0.00850536	56.6609	48.9279	-0.211697	71.0112	61.4373	-0.20893	76.0563	74.2022	-0.0356065	62.1548	57.0261	-0.124244	0.42265	0
ACER2	chr5:106185778-106237588	2.63961	2.41594	-0.127742	3.61383	3.04752	-0.245893	3.93058	3.48905	-0.171905	4.58112	4.25532	-0.106432	3.66794	3.25887	-0.170599	0.4231	0
SUPT20	chr2:143921830-143961849	14.9731	12.6714	-0.240802	15.7095	13.2778	-0.242618	22.5991	22.3249	-0.0176093	24.2002	23.067	-0.0691897	19.1892	17.4981	-0.133102	0.42335	0
CLEC4F	chr4:117839862-117849584	0.405064	0.601663	0.570805	0.985563	0.878717	-0.165549	0.52468	1.3013	1.31044	1.08336	1.25461	0.211733	0.748731	0.989948	0.402904	0.4235	0
SRD5A1	chr17:3845189-3879165	11.2333	10.4344	-0.106429	12.6704	12.1465	-0.0609306	12.0559	11.0416	-0.126785	12.9686	10.629	-0.287013	12.2451	11.0473	-0.148508	0.42365	0
KLHL13	chrX:10253514-10424679	11.413	11.7795	0.0455991	10.129	11.6592	0.202972	13.9003	14.1619	0.0268995	11.0283	13.892	0.333038	11.5928	12.7727	0.139833	0.42385	0
SPHK1	chr10:106639911-106645579	6.2601	5.17055	-0.275867	6.18842	6.98541	0.174774	16.385	10.46	-0.647497	7.89901	9.71352	0.298322	9.01906	7.93875	-0.184067	0.42385	0
CASKIN2	chr10:105901163-105915318	10.9426	11.1294	0.0244207	8.35471	8.4197	0.011179	9.14177	11.0756	0.276838	9.69063	11.6287	0.263032	9.56618	10.4949	0.133671	0.4239	0
DYSF	chr4:118213434-118371283	2.86999	1.99766	-0.522734	2.80159	2.31481	-0.275352	2.54167	2.68169	0.0773659	2.65588	2.76787	0.0595878	2.7308	2.41701	-0.1761	0.42405	0
NDST3	chr2:220272623-220427691	7.81476	7.44827	-0.0692957	7.88174	6.76725	-0.219943	6.49955	6.62181	0.0268855	5.91513	4.01543	-0.558855	7.08991	6.25273	-0.181282	0.4243	0
TMEM86B	chr1:67934750-67937117	1.24402	1.24023	-0.00440141	3.10925	0.922612	-1.75277	2.52441	2.84309	0.171512	2.87182	2.82239	-0.0250464	2.42657	1.89996	-0.35295	0.4243	0
SFT2D2	chr13:80925171-80946239	6.23999	5.48581	-0.185839	5.68748	5.88447	0.0491223	5.53228	6.26867	0.180286	5.06049	7.66873	0.59971	5.66218	6.27286	0.147766	0.42435	0
STON1	chr6:12473165-12490453	7.91719	6.78697	-0.222219	6.75724	7.71636	0.191486	6.08745	6.82095	0.164133	4.70108	7.5736	0.687986	6.43486	7.20763	0.163617	0.4244	0
PPIB	chr8:70343362-70352436	71.1937	77.1421	0.115769	74.0282	81.4271	0.137434	114.095	109.105	-0.0645112	104.086	131.974	0.34248	90.0035	98.4284	0.129094	0.4246	0
TMEM120A	chr12:22069813-22078476	8.25378	8.91567	0.111288	8.99809	10.1615	0.175424	14.7354	16.8529	0.19371	14.3449	16.6021	0.210827	11.4403	12.8823	0.171261	0.42505	0
LRP1B	chr3:20761303-22918609	1.3152	1.35844	0.046672	1.3137	1.134	-0.212216	1.81971	1.75822	-0.049594	1.56379	1.13052	-0.468059	1.4954	1.33621	-0.162378	0.4251	0
RPS18	chr20:5083625-5087304	237.843	271.929	0.193219	252.384	267.465	0.0837312	337.541	332.437	-0.0219787	301.878	360.056	0.254254	280.864	304.938	0.118642	0.4251	0
PADI2	chr5:159762823-159805399	37.8645	39.2536	0.0519773	37.8638	39.1819	0.0493672	30.3856	38.3767	0.33684	30.7501	32.6391	0.0860123	34.5057	37.3836	0.115569	0.4252	0
GALR2	chr10:106393623-106396403	3.76867	3.8856	0.0440833	4.37694	3.08309	-0.505547	5.97016	3.85614	-0.630612	4.02614	4.30635	0.0970673	4.51508	3.75712	-0.265124	0.42525	0
SASH1	chr1:3319805-3487194	9.28292	9.9396	0.098609	8.30635	9.06295	0.125766	7.40365	8.5897	0.214371	6.45598	7.11912	0.141063	7.93333	8.70771	0.134368	0.42535	0
IER3	chr20:3076567-3077772	9.85603	8.51576	-0.210871	9.28782	10.0726	0.117028	23.3027	17.6951	-0.397145	14.8469	13.9177	-0.0932342	14.0701	12.3196	-0.191676	0.42555	0
ZFP483	chr5:76990070-77003107	18.2324	16.948	-0.105385	16.3965	15.0942	-0.119398	14.8612	14.6087	-0.0247207	12.6544	9.89942	-0.35422	15.6722	14.2189	-0.140399	0.42555	0
SDHD	chr8:53955066-53964598	68.0678	73.1812	0.104501	72.3061	82.1175	0.183572	62.48	63.0903	0.0140238	63.055	72.7724	0.206781	66.8418	72.8994	0.125154	0.42585	0
MZT2B	chr11:86934909-86940800	31.1519	28.7865	-0.11393	27.4513	28.2826	0.043038	32.7413	22.1158	-0.566032	19.7977	20.778	0.0697254	27.9161	25.1455	-0.1508	0.4259	0
WARS2	chr2:193819861-193902421	5.99691	6.99654	0.222422	6.17309	6.24445	0.016582	4.47988	5.12553	0.194241	4.35918	5.98938	0.45835	5.31168	6.10805	0.201543	0.4261	0
TTF2	chr2:195988287-196018852	5.12911	4.74292	-0.112934	5.0814	4.42698	-0.198902	4.3754	4.35198	-0.00774294	4.28888	3.31012	-0.373719	4.7518	4.22084	-0.170942	0.42615	0
CHD1L	chr2:192382679-192438127	4.79729	4.71213	-0.0258396	5.213	5.02997	-0.0515619	3.37686	5.20195	0.62337	3.69418	5.08795	0.461831	4.32242	4.9872	0.206389	0.42625	0
F8	chr18:121133-162008	5.00358	3.84387	-0.380402	4.61696	4.7039	0.0269126	4.67377	4.95145	0.0832646	5.27137	4.39511	-0.262281	4.90014	4.44924	-0.139262	0.42625	0
METTL10	chr1:192296931-192320995	18.1078	17.6888	-0.0337806	18.5138	14.9082	-0.312498	17.9096	15.6089	-0.198369	15.7189	14.035	-0.163476	17.6418	15.5714	-0.180097	0.42625	0
WDR55	chr18:29461319-29467315	7.15894	8.94002	0.320533	8.24931	9.08061	0.138514	8.29092	9.53093	0.201084	7.55471	8.31774	0.138814	7.82251	8.9477	0.193884	0.42635	0
DQX1	chr4:117269043-117277882	3.9679	4.09698	0.0461842	5.76863	4.94288	-0.222875	10.8745	9.89365	-0.136378	10.6158	8.93748	-0.248278	7.65496	6.80141	-0.170562	0.42655	0
RGD1306215	chr3:3625546-3627090	20.0856	23.3117	0.214896	22.0187	28.0458	0.349053	28.3962	32.8386	0.209691	34.5382	33.2695	-0.0539916	26.0354	29.0658	0.158852	0.42675	0
OBSCN	chr10:45286929-45432832	0.910792	0.969076	0.0894888	0.810676	0.861393	0.0875463	0.766366	0.651447	-0.234387	0.774329	0.394802	-0.971817	0.820198	0.729388	-0.169284	0.42715	0
EPHX2	chr15:45497659-45556101	1.37301	1.86773	0.443947	2.58457	1.76504	-0.550224	1.8617	2.45518	0.399207	1.78416	3.3466	0.907448	1.90806	2.3207	0.282455	0.42735	0
KIF22	chr1:186205161-186293437	0.590937	0.540166	-0.129601	0.589766	0.745058	0.33721	0.975872	1.10028	0.173106	0.780473	1.41181	0.85513	0.727407	0.928305	0.351836	0.42745	0
SORD	chr3:109016829-109048446	14.2536	15.8718	0.155139	15.2203	16.4911	0.115691	15.8966	18.5407	0.221976	15.376	16.6663	0.116253	15.1947	16.8074	0.145529	0.4275	0
PECAM1	chr10:96056219-96057224	1.99656	1.19789	-0.737022	1.80293	1.28329	-0.490497	6.10921	3.52298	-0.794191	2.93317	4.32784	0.561187	3.13716	2.49582	-0.329945	0.4276	0
PANK3	chr10:20679743-20703570	24.9544	23.5277	-0.0849306	24.1589	23.557	-0.0363983	31.1996	29.8005	-0.0661913	31.6298	26.9274	-0.232207	27.8587	25.7442	-0.113876	0.42795	0
KCNK3	chr6:25744190-25782194	32.5703	29.2788	-0.153698	29.6078	25.4775	-0.216753	19.454	18.4426	-0.0770225	18.1269	16.5673	-0.129787	25.3504	22.6917	-0.159841	0.42805	0
ZBTB3	chr1:211469241-211471559	2.84518	2.56972	-0.146912	2.47113	3.82246	0.629332	3.42197	3.9309	0.200034	2.88096	3.51074	0.285223	2.89703	3.43218	0.244551	0.42805	0
S1PR3	chr17:19657821-19671061	51.9498	55.5941	0.0978115	55.0107	63.185	0.199872	82.5338	71.7809	-0.201385	49.5631	68.7099	0.471251	59.4765	64.3211	0.112972	0.4282	0
NUP54	chr14:17178760-17197062	13.3686	9.76184	-0.453628	12.2217	11.2583	-0.118454	15.1173	15.561	0.0417378	15.0564	14.2245	-0.0820014	13.9102	12.5357	-0.1501	0.42825	0
CD68	chr10:56481700-56483580	4.91829	6.16584	0.326141	7.41743	7.70556	0.054981	33.2107	17.1936	-0.949777	10.6645	17.6732	0.728751	13.5874	11.8358	-0.19911	0.4283	0
COQ3	chr5:36640717-36656981	5.13068	10.2906	1.0041	6.91979	7.0666	0.0302881	12.6956	12.3895	-0.0352169	13.5464	14.5813	0.10621	9.39313	10.9161	0.216777	0.42835	0
ACVRL1	chr7:139873595-139884675	3.12219	2.41332	-0.371543	2.96197	2.74107	-0.111818	2.94611	2.68259	-0.135185	3.17579	2.80902	-0.177049	3.0589	2.64956	-0.207259	0.42875	0
FJX1	chr3:87639893-87642306	10.1574	8.00752	-0.343105	8.36453	8.87521	0.0854969	7.66912	5.61671	-0.449337	5.9742	5.90352	-0.0171711	8.12882	7.16358	-0.182367	0.42875	0
RPL36A	chrX:122041846-122044560	71.5902	96.5476	0.431478	87.5226	81.5329	-0.102274	55.546	57.7215	0.055424	48.407	56.2348	0.216247	66.6724	73.8269	0.147057	0.4288	0
TSPAN6	chrX:121432320-121439205	11.9286	13.3455	0.161932	10.7971	13.0265	0.270803	18.4102	18.2506	-0.012561	16.3087	19.686	0.271526	14.2216	15.8649	0.157757	0.429	0
SKOR2	chr18:73823415-73827612	2.75757	2.82881	0.0367968	3.58912	2.79155	-0.362567	1.921	1.74985	-0.134624	2.69307	1.2245	-1.13705	2.77185	2.1834	-0.344278	0.42935	0
MIPEP	chr15:39871328-39992460	10.6009	10.6533	0.00712195	9.86462	11.857	0.265408	8.63857	9.46274	0.131466	8.21236	10.3253	0.330318	9.40289	10.5889	0.171371	0.4297	0
RXFP3	chr2:60390776-60392207	4.0157	4.56588	0.185243	4.49792	6.04527	0.426549	2.89305	2.60804	-0.149625	2.20507	3.1851	0.530513	3.4576	4.16195	0.267488	0.4298	0
SAMD14	chr10:83695828-83710239	96.6859	83.4755	-0.211953	90.4467	88.3263	-0.034225	81.2156	73.7893	-0.138344	78.0469	75.4761	-0.0483223	87.2028	80.4083	-0.11703	0.43	0
CCDC155	chr1:95660199-95682176	1.02845	0.72458	-0.505259	1.59537	1.16403	-0.454759	2.3233	2.37503	0.0317742	2.61148	1.94507	-0.425044	1.86107	1.51086	-0.300757	0.43005	0
EIF4EBP1	chr16:69110506-69123895	3.67099	3.65905	-0.00470165	3.82895	3.53925	-0.113504	4.58314	8.31399	0.859203	4.58775	5.32026	0.213709	4.1536	5.0975	0.295428	0.4302	0
IBA57	chr10:45460149-45468306	3.27956	3.22633	-0.0236087	2.47052	3.16197	0.356007	1.20918	1.77182	0.551194	1.14741	1.85146	0.690278	2.08074	2.53883	0.287065	0.4302	0
RBFOX1	chr10:8213473-9790755	63.2073	53.5318	-0.239697	60.8425	55.8311	-0.12401	49.6452	48.0896	-0.0459293	50.6267	44.2484	-0.194271	56.5572	50.5565	-0.161816	0.43025	0
B3GAT1	chr8:26333217-26360361	75.6931	69.2662	-0.128012	74.9484	68.3138	-0.133721	58.1742	51.5131	-0.175441	54.2173	49.6303	-0.12753	66.4519	60.0893	-0.145202	0.43055	0
CYB5D2	chr10:59667010-59683247	9.51044	7.4441	-0.353416	7.68085	7.30893	-0.071605	7.03296	7.81902	0.152856	7.76065	5.39084	-0.525667	8.05323	6.99665	-0.202904	0.43055	0
CDON	chr8:35238898-35291743	14.6433	17.1616	0.228938	13.9412	14.4498	0.0516982	14.6607	15.588	0.088486	13.5201	14.9295	0.143063	14.2293	15.5156	0.124859	0.43065	0
DPF1	chr1:84444070-84453656	2.76088	2.59913	-0.0870986	3.28285	3.4985	0.0917865	5.42361	4.20079	-0.368592	5.67478	4.48553	-0.339286	4.22354	3.6467	-0.211862	0.4309	0
NOD1	chr4:83398808-83449207	1.5397	2.07936	0.433494	1.47851	1.67007	0.175764	2.56164	1.99412	-0.361312	1.15471	2.11929	0.876043	1.67489	1.9562	0.22399	0.4312	0
GNA15	chr7:9669955-9689442	2.56039	2.95436	0.206481	1.95122	3.92729	1.00916	4.00566	3.83777	-0.0617707	3.07401	2.96201	-0.0535472	2.86701	3.41155	0.25088	0.4313	0
KDM3A	chr4:104866459-104911527	24.1885	21.8365	-0.14758	22.9882	23.1251	0.00856334	26.0514	24.1545	-0.109068	30.813	27.1311	-0.183592	25.9453	23.9077	-0.118001	0.4313	0
EPHA6	chr11:40551270-41459033	6.25802	6.42428	0.0378301	5.5818	6.46315	0.211509	3.49311	4.96081	0.506065	4.65253	4.67466	0.00684568	5.06409	5.66624	0.162089	0.43175	0
WRAP53	chr10:56380913-56398501	6.66395	5.11637	-0.381255	6.31388	5.62852	-0.165771	6.79606	6.29126	-0.111349	8.22702	7.61559	-0.111414	6.9911	6.10007	-0.196692	0.432	0
C11ORF30	chr1:155860916-155932863	14.9938	12.3329	-0.281853	12.9069	12.864	-0.00480472	12.0262	11.6328	-0.0479797	13.3351	12.051	-0.146077	13.3887	12.2132	-0.13258	0.43215	0
MYH7B	chr3:146115686-146139441	4.65326	3.3517	-0.473348	4.46216	3.82031	-0.224052	4.52999	5.16708	0.189839	5.50132	5.16636	-0.0906282	4.78724	4.31737	-0.149041	0.43225	0
CD97	chr19:26089267-26108993	0.777546	0.80772	0.0549265	0.807908	0.807341	-0.0010132	1.3979	1.76492	0.336345	0.751463	1.26437	0.750641	0.926522	1.13675	0.295021	0.43245	0
PRR11	chr10:75362905-75382514	1.43522	0.812049	-0.821629	0.813454	0.527142	-0.625867	0.842787	1.37185	0.702885	1.73656	1.04856	-0.727822	1.20781	0.921644	-0.39011	0.4326	0
RESP18	chr9:74551808-74558151	79.974	99.3662	0.313224	82.3715	95.2154	0.209049	119.013	113.233	-0.0718265	97.8629	107.51	0.135632	94.2067	103.191	0.131415	0.43265	0
LOC100910318	chr10:37197744-37201992	19.4601	21.2476	0.126781	17.4373	19.8474	0.186777	30.566	33.4914	0.131865	30.7001	36.3925	0.245396	24.255	27.2465	0.16779	0.4329	0
RSG1	chr5:160070842-160076506	3.23475	3.49325	0.110917	4.9348	3.58071	-0.462746	2.32415	2.42493	0.0612369	3.44764	1.70023	-1.01988	3.52782	2.83725	-0.314285	0.43295	0
PIGU	chr3:145760692-145841945	9.28606	10.3222	0.152613	11.3095	12.6637	0.163166	16.9588	17.806	0.0703281	16.3402	19.8248	0.27888	13.3208	14.8937	0.16102	0.4332	0
ERO1LB	chr17:67012198-67056250	6.41703	6.07223	-0.0796778	6.23291	6.50006	0.0605477	6.94458	6.94079	-0.000788502	9.09236	5.89566	-0.625002	7.14491	6.33172	-0.174318	0.4333	0
SPI1	chr3:75456352-75475722	5.41977	4.61728	-0.231189	4.95718	4.19504	-0.240836	11.9832	7.04432	-0.766482	3.53939	6.29785	0.831358	6.40026	5.4573	-0.229942	0.4337	0
SNAPC4	chr3:4535366-4552793	4.01708	3.28931	-0.28836	5.9841	4.34194	-0.462797	4.57703	5.23031	0.192484	5.67227	5.505	-0.043184	5.07077	4.53216	-0.162005	0.4338	0
ADRB1	chr1:263025654-263028122	35.8091	33.6037	-0.0917097	37.563	35.03	-0.100723	26.6868	24.406	-0.12889	28.9828	23.6597	-0.292767	32.5912	29.4131	-0.148024	0.434	0
SCHIP1	chr2:157848638-158631812	43.8876	49.2852	0.167342	46.7528	50.426	0.109115	47.7387	47.8216	0.00250372	40.4524	48.2572	0.254518	44.8301	48.8837	0.124885	0.43415	0
RGD1562161	chrX:56464424-56528474	6.42007	5.54134	-0.212354	7.15883	5.76416	-0.312614	6.45722	7.54906	0.225382	7.2523	5.67902	-0.352799	6.83709	6.08863	-0.167265	0.4344	0
NEUROG2	chr2:224895749-224898308	0.516915	0.83763	0.696386	0.884824	0.622979	-0.506208	1.85163	0.942873	-0.973658	0.962842	0.870726	-0.145082	1.03413	0.811572	-0.349624	0.43445	0
RGD1564300	chr1:190956347-190966765	6.11342	6.39959	0.0659987	6.72264	10.7001	0.670526	10.696	12.0467	0.171563	11.6149	11.4613	-0.0191983	8.67374	10.0238	0.208699	0.4345	0
DNASE2	chr19:24900948-24903617	9.81143	9.12806	-0.104154	9.84251	13.6024	0.466768	22.0447	22.1357	0.00594356	15.9829	20.2375	0.340506	14.1805	15.9324	0.168055	0.43465	0
FAM19A5	chr7:125835327-126057007	56.6695	62.2515	0.135535	57.7826	64.521	0.159133	73.542	71.9331	-0.0319137	59.0512	70.4952	0.255559	61.6183	66.8986	0.118616	0.4347	0
TMEM126B	chr1:147146180-147158120	22.8339	19.3293	-0.240388	25.8391	16.7147	-0.628441	26.3342	28.9999	0.139113	26.4525	26.0382	-0.0227727	25.3628	22.432	-0.177154	0.4347	0
FCGR2B	chr13:86809010-86823599	7.75333	8.37472	0.111225	7.52003	7.82788	0.0578844	15.7494	9.2393	-0.769438	6.85736	7.27607	0.0855075	9.37012	8.15535	-0.200322	0.4352	0
BOD1	chr10:16255403-16261744	17.0057	21.3089	0.325434	17.5848	22.1595	0.333597	24.3611	24.4506	0.00528933	24.4477	24.4467	-6.24e-05	20.6962	22.9528	0.1493	0.43525	0
SLC24A6	chr12:37227843-37250698	1.57491	1.99734	0.342807	1.66512	2.24467	0.430881	3.38483	2.52695	-0.421686	2.04164	3.44991	0.756829	2.13776	2.52233	0.238661	0.4361	0
HTR3A	chr8:52161146-52173514	4.54205	4.44665	-0.0306239	5.83195	4.9266	-0.243385	5.467	4.68736	-0.221974	5.55844	4.51416	-0.300222	5.35177	4.63436	-0.207646	0.43665	0
TXNDC12	chr5:130142599-130167628	26.1511	25.2018	-0.0533451	26.1874	32.762	0.323154	42.5526	46.0776	0.11482	44.7672	52.1624	0.220569	34.5037	38.3391	0.152064	0.43665	0
TRMT10A	chr2:235670050-235683260	7.81439	9.64619	0.303826	8.37245	9.91737	0.244308	6.35751	8.38691	0.399677	8.5874	8.02631	-0.0974837	7.82292	9.01973	0.205376	0.43695	0
GEMIN4	chr10:63564267-63571235	4.01906	4.04591	0.00960315	3.45729	4.33988	0.328013	3.75197	4.8335	0.365422	4.03356	4.20627	0.0604858	3.82142	4.33538	0.18205	0.4374	0
IL18	chr8:53936583-53943228	0.925083	0.79897	-0.211442	0.602999	0.178374	-1.75725	4.20619	4.59337	0.127038	1.7602	4.81437	1.4516	1.81027	2.4637	0.444628	0.4375	0
LPIN3	chr3:151689959-151702944	6.05263	5.05149	-0.260853	6.16831	5.7527	-0.100636	6.00736	5.42062	-0.148273	7.93463	7.28145	-0.123939	6.53554	5.83339	-0.163972	0.43755	0
SUGT1	chr15:60840403-60882423	46.4513	57.6768	0.312273	49.0391	52.8112	0.106911	58.8371	58.6122	-0.00552588	55.9696	61.4771	0.135407	52.4148	57.3699	0.130321	0.43765	0
CSTB	chr20:10576663-10578706	61.8966	67.6386	0.127986	70.8	77.8992	0.13786	99.9822	104.928	0.0696523	92.3386	111.043	0.266108	80.5706	89.0823	0.144885	0.4381	0
PTH2R	chr9:63942379-64049405	2.06655	1.55751	-0.407984	1.87077	2.13147	0.188217	2.2604	1.27421	-0.826979	1.56539	1.37879	-0.183113	1.9458	1.59649	-0.285461	0.4382	0
RIN3	chr6:126555386-126665098	0.964173	1.25002	0.374583	0.859393	1.16202	0.43524	1.85498	1.50278	-0.303772	1.00602	1.647	0.711189	1.15754	1.37617	0.249592	0.4383	0
USP48	chr5:156351098-156418283	30.0903	27.6791	-0.120498	31.2112	29.6835	-0.0724037	31.528	29.5974	-0.0911637	30.9677	28.2301	-0.133529	31.0031	28.7179	-0.110459	0.43855	0
SP110	chr9:84258231-84279462	3.01896	3.97272	0.396075	2.49336	2.91071	0.22328	7.90927	6.44148	-0.296154	5.06085	8.22702	0.70099	4.52022	5.25976	0.218605	0.43865	0
SSRP1	chr3:68228044-68282601	56.9645	52.1004	-0.128771	55.7757	53.2482	-0.0669034	59.5844	54.3658	-0.132236	59.2069	55.26	-0.0995285	57.935	53.549	-0.113576	0.43875	0
TMEM141	chr3:3791544-3793503	8.75768	13.582	0.633078	10.7156	11.9742	0.160212	19.1468	20.1232	0.0717542	17.1587	18.6532	0.120481	13.7314	15.8468	0.206716	0.43875	0
CARD11	chr12:14089003-14229263	3.00553	2.99543	-0.00485583	2.81917	3.8862	0.463092	4.40266	4.19388	-0.0700917	2.20921	3.11207	0.494341	3.10105	3.53019	0.186987	0.43885	0
FAM229B	chr20:43266771-43280001	3.06566	3.35282	0.129174	2.49983	3.60345	0.527551	2.07743	2.98457	0.522722	3.81161	4.84336	0.345607	2.87015	3.67428	0.356337	0.43885	0
ZDBF2	chr9:61951629-61989952	2.7454	2.69893	-0.0246284	2.50517	1.92374	-0.380995	2.4103	2.44916	0.0230769	2.11883	1.80768	-0.229129	2.46072	2.22109	-0.147811	0.43885	0
F10	chr16:81327236-81346544	0.377737	1.15608	1.61379	0.612974	0.42489	-0.528736	1.77283	1.02339	-0.792693	0.748874	1.93729	1.37124	0.855975	1.11333	0.379247	0.4389	0
RAB7B	chr13:44611966-44638175	3.75139	3.85406	0.0389522	3.21995	4.75162	0.561384	4.93598	5.16255	0.0647479	3.77669	4.24603	0.16899	3.90383	4.4789	0.198256	0.43895	0
HDHD2	chr18:73896017-73949689	26.4095	21.5173	-0.295562	27.5645	27.7047	0.00731949	26.4178	23.6271	-0.161064	24.8427	22.9063	-0.117078	26.4051	23.912	-0.143079	0.43935	0
DDX25	chr8:35326938-35343018	30.7259	27.5724	-0.156232	32.5609	29.2484	-0.15478	28.3491	26.8545	-0.0781381	28.2257	26.2593	-0.104182	30.1294	27.4711	-0.13326	0.43945	0
GNG5	chr2:244702796-244725738	41.4828	49.2137	0.246545	38.8448	43.7352	0.171073	42.9679	53.1572	0.307005	32.6867	38.7586	0.245814	39.137	46.1246	0.237005	0.43965	0
TMEM86A	chr1:97604466-97608864	6.04307	6.80653	0.171638	7.11301	7.42586	0.0620974	8.43985	9.00424	0.0933867	5.68649	8.15367	0.519911	6.81592	7.78329	0.191473	0.43965	0
SARDH	chr3:6076165-6142565	7.72276	9.77356	0.339768	9.50394	9.51254	0.00130479	5.53757	6.44376	0.21865	5.64824	6.09051	0.108761	7.20389	8.03839	0.158131	0.44005	0
HLCS	chr11:34379322-34536759	5.30475	4.43937	-0.256931	4.90873	3.83596	-0.355763	2.86271	3.17787	0.150678	2.68813	2.66706	-0.011353	4.01699	3.55912	-0.174595	0.44025	0
ATG13	chr3:76055115-76090369	50.3269	49.2407	-0.0314796	49.3521	45.7357	-0.109791	46.5714	43.3744	-0.102602	48.7044	42.2946	-0.203579	48.9227	45.199	-0.114211	0.4403	0
ATP8A2	chr15:38760112-39194325	21.3368	22.6362	0.0852873	23.39	17.5337	-0.415758	13.7328	18.4335	0.424711	17.5279	11.4113	-0.619199	19.2388	17.6233	-0.126528	0.4403	0
TFAP4	chr10:11144056-11159763	2.681	2.51642	-0.0913996	2.94603	2.66963	-0.142131	4.66018	3.8464	-0.276878	4.11635	3.27873	-0.328226	3.56312	3.04068	-0.228748	0.44045	0
C1QA	chr5:155662332-155665248	30.4047	27.6712	-0.135911	25.4193	36.398	0.517937	135.469	73.0925	-0.890165	59.2536	89.0756	0.588127	60.6572	54.9332	-0.143001	0.4405	0
CLDN9	chr10:12947422-12948854	11.6144	10.8727	-0.0952081	11.8826	13.9126	0.22754	23.7515	14.3866	-0.72329	13.2791	14.6178	0.138567	14.9533	13.3468	-0.163969	0.4405	0
GSTM1	chr2:203575443-203580821	20.1339	20.1753	0.00296267	23.7235	24.9149	0.0706916	72.8756	69.9331	-0.0594613	58.8163	80.582	0.454241	42.7071	47.1873	0.143925	0.4406	0
CD300A	chr10:104775534-104789150	2.38919	2.73251	0.193706	1.67288	1.62601	-0.0410011	3.46305	1.51759	-1.19026	1.3079	1.13088	-0.209807	2.19992	1.77501	-0.309623	0.4409	0
HSF1	chr7:114524210-114551166	26.2825	20.7256	-0.342694	25.6526	24.4472	-0.0694343	27.1142	26.8678	-0.0131714	30.5762	29.065	-0.0731271	27.3974	25.0483	-0.129327	0.44105	0
MTIF2	chr14:110538910-110559208	7.68848	5.41687	-0.50524	8.26647	6.68768	-0.305767	8.78326	9.41351	0.0999765	10.4974	10.3701	-0.017609	8.7852	7.83524	-0.165098	0.4411	0
HAPLN1	chr2:19576063-19638104	2.04385	2.58377	0.338191	2.49172	1.80287	-0.466847	1.74831	2.24318	0.359583	1.83141	3.27867	0.840158	2.04683	2.45565	0.262717	0.44135	0
CHMP4B	chr3:145178372-145179850	14.144	18.5893	0.394279	15.8328	15.4506	-0.0352576	24.9968	28.7059	0.199601	23.7637	24.9434	0.0698984	19.4588	21.5771	0.149076	0.4415	0
REEP3	chr20:22314082-22399471	17.0652	18.6229	0.126023	17.897	17.2563	-0.0525903	17.6793	18.1885	0.0409675	13.8749	19.6152	0.499498	16.7082	18.3503	0.135248	0.44155	0
BSPRY	chr5:79471060-79493239	2.48282	2.72842	0.136087	2.63787	3.13671	0.24988	2.28553	3.11255	0.445564	3.09179	3.49493	0.176822	2.62852	3.09897	0.237535	0.4417	0
ATOX1	chr10:40858189-40873226	64.8265	81.9054	0.337375	71.239	80.1051	0.169226	104.621	108.547	0.0531463	90.1635	97.8795	0.118464	82.0345	91.2165	0.153066	0.44175	0
GM581	chr1:95653013-95656199	0.610226	0.549333	-0.151663	0.604899	0.637375	0.0754483	2.14271	1.74238	-0.298375	2.26284	1.5355	-0.559429	1.36332	1.08166	-0.333884	0.44175	0
MST4	chrX:137577960-137627511	1.06724	1.64698	0.625945	1.20905	1.66595	0.462473	1.15847	1.10812	-0.0641072	1.43517	1.61327	0.168764	1.21623	1.51407	0.31601	0.442	0
TPMT	chr17:23697899-23714167	1.62566	0.797886	-1.02677	0.801743	1.56732	0.967085	3.31877	1.6472	-1.01063	3.58825	3.0472	-0.235798	2.27698	1.72477	-0.400723	0.442	0
DNAJB12	chrUn:42014523-42033348	1.76925	2.86708	0.696449	5.12143	0.834551	-2.61748	0.973	2.05169	1.0763	0.551663	5.43186	3.29959	2.18001	2.7369	0.328204	0.44205	0
GCH1	chr15:23022309-23139794	2.79941	0.506758	-2.46575	1.95078	1.35975	-0.520713	1.40283	2.47249	0.817631	0.792852	1.07281	0.436275	1.7769	1.32248	-0.426116	0.4421	0
ELOVL7	chr2:39527639-39599565	0.956411	0.927246	-0.0446793	0.720375	1.65228	1.19764	0.705053	0.364908	-0.950198	0.624815	1.216	0.960648	0.75859	1.05185	0.471532	0.4422	0
ARL15	chr2:45452899-45706522	7.62756	6.07012	-0.329496	7.56442	7.11203	-0.0889691	6.4119	6.39245	-0.00438228	6.87498	6.06538	-0.180758	7.16477	6.40384	-0.161983	0.4424	0
SLC1A4	chr14:101121592-101154016	12.9314	13.9967	0.114209	11.9652	15.3875	0.362913	11.3021	11.4041	0.0129694	9.5419	10.4927	0.137035	11.5177	12.9003	0.163549	0.4424	0
CCS	chr1:207429927-207450996	36.1432	37.7402	0.0623789	43.7632	34.7416	-0.333054	45.7446	43.5113	-0.0722117	50.979	45.2199	-0.172946	44.0235	39.9666	-0.139478	0.4425	0
EMC2	chr7:79265487-79300317	29.925	34.1273	0.189576	28.3992	32.2459	0.183266	41.5837	40.5146	-0.0375732	35.0799	42.1013	0.263218	33.5545	36.9162	0.137749	0.44255	0
TIAL1	chr1:187685007-187706184	34.2548	32.4113	-0.079806	34.9728	32.3222	-0.11371	44.3446	40.6865	-0.12421	47.6188	39.2952	-0.277179	40.0756	35.8617	-0.160279	0.4429	0
HOPX	chr14:33349867-33377945	91.0992	87.6088	-0.0563634	85.8007	94.3495	0.137025	90.5293	125.261	0.468476	127.33	125.106	-0.0254104	98.4229	106.778	0.11755	0.44295	0
YARS2	chr11:86609023-86614806	5.77815	5.00987	-0.205834	8.82657	6.62422	-0.414104	7.63143	5.57068	-0.454099	5.8132	6.94684	0.257026	7.03768	6.00819	-0.228168	0.44335	0
MAU2	chr16:19867097-19898257	22.8321	22.5236	-0.0196265	25.876	22.6591	-0.191524	24.9697	24.9944	0.00142813	27.2332	23.7064	-0.200095	25.2386	23.3609	-0.111537	0.44345	0
KITLG	chr7:37714156-37795722	12.5362	11.1113	-0.174078	10.1112	9.37174	-0.109566	11.3607	10.8573	-0.0653852	10.3497	9.59338	-0.109473	11.1302	10.2117	-0.124254	0.44395	0
C78339	chr17:24088383-24094767	32.1117	29.0067	-0.146713	33.0732	30.4849	-0.11757	14.3112	17.508	0.290876	24.6339	17.326	-0.507712	26.4878	23.8952	-0.148607	0.4441	0
RAC2	chr7:116520065-116532482	4.58925	4.95692	0.111185	5.90971	4.65352	-0.344763	15.5333	11.1201	-0.482196	8.72415	9.47602	0.119267	8.49808	7.36741	-0.205978	0.44415	0
CTHRC1	chr7:74630043-74640326	2.80792	1.77284	-0.66344	3.1862	2.24793	-0.50324	3.96128	4.83792	0.288421	3.90825	2.69201	-0.537839	3.44679	2.82622	-0.286382	0.4443	0
SHANK1	chr1:94791886-94840584	38.917	36.974	-0.0738894	37.5477	35.8431	-0.0670285	34.9467	34.296	-0.0271158	33.0113	27.1503	-0.281992	36.3102	33.6565	-0.109488	0.44435	0
PLCB2	chr3:105203523-105223342	0.703702	0.308863	-1.188	0.54641	0.784492	0.521775	1.21663	0.781782	-0.63805	0.650937	0.691628	0.08748	0.771522	0.633626	-0.284074	0.4445	0
INTS10	chr16:21907202-21938146	26.4915	25.8411	-0.0358653	28.5596	24.5321	-0.219302	24.9584	25.8694	0.0517247	26.5526	22.006	-0.270956	26.7547	24.5418	-0.124551	0.44455	0
RBMX	chrX:142112478-142119346	40.8978	40.3259	-0.0203158	42.7385	38.7701	-0.14059	48.7934	46.1341	-0.0808542	52.3932	45.879	-0.191544	46.0703	42.4821	-0.116984	0.44455	0
ZFP202	chr8:43144085-43164338	3.32347	3.48013	0.0664508	3.81182	3.22899	-0.239396	4.70059	4.15308	-0.17866	5.4635	4.49402	-0.281819	4.29289	3.8011	-0.175533	0.44455	0
KCTD1	chr18:6225048-6325708	17.0407	15.7759	-0.11126	15.8586	15.6139	-0.0224405	19.234	16.6918	-0.20452	18.4996	16.5072	-0.164403	17.6313	16.0813	-0.132753	0.4447	0
ITPR2	chr4:183677605-184066130	1.70927	1.95952	0.197124	1.46441	1.8337	0.324446	2.18953	2.22179	0.0210988	1.47958	1.62115	0.131837	1.70656	1.9037	0.157715	0.4448	0
STRADB	chr9:57540914-57559817	14.1458	14.4731	0.0329982	15.8448	14.8164	-0.0968155	17.4323	13.9483	-0.321667	16.9405	15.3163	-0.14541	16.0634	14.6038	-0.137427	0.4448	0
C1QTNF6	chr7:116479790-116486309	1.80691	1.08445	-0.736555	1.47579	2.12927	0.528872	2.31381	2.92345	0.337398	2.00563	3.09531	0.626033	1.89008	2.25861	0.256989	0.44485	0
A2M	chr4:158103710-158153423	105.871	94.5716	-0.162835	96.3267	126.989	0.398695	374.11	204.167	-0.873717	101.62	189.787	0.90119	165.443	150.848	-0.133234	0.44495	0
ABTB1	chr4:122930390-122936676	17.8183	16.9115	-0.0753568	19.0678	17.0327	-0.162831	18.8546	17.6212	-0.097606	19.9264	17.2018	-0.212126	18.9352	17.1368	-0.143973	0.44505	0
ALG3	chr11:82531569-82535341	7.3573	5.34596	-0.460728	10.5449	3.17785	-1.73042	18.883	16.1858	-0.222351	17.9453	20.3915	0.184357	13.4413	10.8266	-0.312097	0.4453	0
KCNN3	chr2:181715893-181860459	1.54056	1.26804	-0.280852	2.14088	1.44996	-0.562186	1.22437	1.09308	-0.163643	0.823	0.944266	0.1983	1.45726	1.19594	-0.285113	0.44555	0
AP1S2	chrX:51329573-51356406	28.1963	31.4313	0.156694	29.5849	29.3656	-0.0107375	38.8275	41.069	0.0809693	38.4479	46.4358	0.272332	33.564	36.5883	0.124464	0.44565	0
CCNA1	chr2:144275210-144285196	1.17865	1.75824	0.577001	2.12468	1.73164	-0.295107	0.734786	1.52574	1.05412	0.766079	1.08335	0.49993	1.22839	1.53429	0.320805	0.4457	0
ACOX3	chr14:80767771-80809809	19.4794	15.6577	-0.315083	17.2056	17.1333	-0.00607727	14.8855	13.1072	-0.183549	12.2504	12.5722	0.0374063	16.1267	14.6876	-0.134854	0.44585	0
ANKRD27	chr1:88117682-88192064	10.6947	9.02409	-0.245044	10.4256	10.3113	-0.0159008	12.8678	12.5366	-0.0376244	14.6432	12.4715	-0.231601	12.0997	10.9715	-0.1412	0.44585	0
SCRN3	chr3:55818803-55843527	17.2485	18.4543	0.0974835	20.269	14.4602	-0.487181	11.527	10.5356	-0.129749	13.0887	10.7862	-0.279136	15.7533	13.7081	-0.200622	0.44595	0
ZFP418	chr1:64978602-64989822	5.46913	4.56732	-0.259962	5.29428	4.04377	-0.388735	4.90729	5.11271	0.0591624	4.9026	4.61446	-0.0873837	5.16932	4.55738	-0.181772	0.44595	0
OTOR	chr3:131432571-131435826	0.376986	0.949905	1.33327	0.272478	0.363459	0.415654	0.586853	0.849236	0.533167	0.92679	0.935801	0.0139602	0.530587	0.766578	0.530842	0.446	0
LOC690344	chr1:211549820-211550599	26.4167	29.5591	0.162149	28.2874	38.4811	0.443991	33.6997	31.8459	-0.0816297	35.3153	39.2911	0.153911	30.8002	34.6529	0.170034	0.44605	0
JOSD2	chr1:94945273-94949078	9.95872	9.99505	0.0052528	8.06067	10.1146	0.327469	15.3269	14.8123	-0.0492768	12.1005	18.0747	0.578908	11.2506	13.0253	0.211326	0.4461	0
OTOP3	chr10:105412852-105423998	3.27788	4.11654	0.328668	4.42932	5.29361	0.257167	4.60655	5.00195	0.118804	6.6658	7.3029	0.131692	4.70808	5.37099	0.190048	0.44615	0
ELP5	chr10:56813487-56825095	15.2462	17.8861	0.230395	14.7811	17.8884	0.275265	19.7988	20.3859	0.0421573	21.5988	24.3912	0.175411	17.741	19.9551	0.169674	0.44635	0
PIN1	chr8:19669536-19681741	63.907	68.8783	0.108077	72.6526	75.519	0.0558248	73.5376	80.5285	0.131018	70.3551	83.1096	0.24036	70.1569	76.5242	0.125331	0.44635	0
FAM178A	chr1:249986433-250048899	15.7102	16.068	0.0324892	14.7327	13.547	-0.121056	17.2233	17.0347	-0.0158876	18.6916	14.7436	-0.342301	16.5552	15.2821	-0.115445	0.4465	0
RGMA	chr1:128547398-128591304	10.29	11.0067	0.0971478	9.7384	11.5705	0.248699	14.8878	12.8467	-0.212731	10.3813	14.4073	0.472821	11.2681	12.357	0.13309	0.4465	0
KCNA4	chr3:92777565-92785421	7.10731	6.69739	-0.0857035	7.71514	6.57226	-0.231303	7.43632	6.5407	-0.185143	6.13515	5.83123	-0.0732981	7.12967	6.40856	-0.153836	0.44705	0
PREX1	chr3:157692844-157863952	17.8086	18.43	0.0494829	17.0283	18.4497	0.115666	15.8095	16.3302	0.0467491	10.7608	13.7117	0.349621	15.4966	16.7927	0.115885	0.44705	0
CDH12	chr2:72175511-72601989	4.06326	3.90227	-0.058324	3.39604	2.65839	-0.353301	3.62359	3.48781	-0.0550979	3.09923	2.69624	-0.200962	3.56423	3.18592	-0.161877	0.44715	0
RPL23	chr10:86527233-86531610	299.152	345.92	0.209563	330.922	356.468	0.107281	454.562	459.648	0.0160514	432.787	487.145	0.170696	376.505	407.608	0.114512	0.44715	0
AFAP1L1	chr18:57707562-57768151	1.47788	1.93281	0.387171	1.62481	1.97487	0.281487	1.23239	1.47188	0.256209	1.08093	1.01716	-0.0877327	1.36795	1.61656	0.240913	0.4473	0
CPQ	chr7:68430068-68900500	5.37672	5.74947	0.0967022	6.1087	4.76503	-0.358378	9.1762	8.31739	-0.141767	6.63243	12.6756	0.934447	6.77195	7.70281	0.185812	0.4473	0
WDR74	chr1:211403238-211407978	10.5658	16.2188	0.618267	15.4082	15.7885	0.0351754	19.0099	18.5089	-0.0385361	15.983	18.0552	0.175873	15.137	17.0336	0.170301	0.4473	0
POLE	chr12:46491497-46540008	1.02258	1.01385	-0.0123607	0.935432	0.742345	-0.333543	1.39679	1.10802	-0.334131	1.44354	1.28387	-0.169117	1.19008	1.02543	-0.21483	0.4476	0
HES5	chr5:171763849-171765314	4.76066	5.4589	0.197451	5.48878	6.52255	0.248951	1.58473	5.47906	1.78969	7.00074	5.87004	-0.254138	4.75397	5.82643	0.293479	0.44765	0
S100PBP	chr5:148309347-148350022	20.453	18.2982	-0.160615	20.6486	17.9218	-0.20433	21.1307	19.8885	-0.0874045	19.701	19.5729	-0.00940682	20.5326	18.8266	-0.125144	0.44785	0
CSRP2BP	chr3:132906337-132946872	7.03107	6.70907	-0.0676308	7.84627	6.13578	-0.354762	5.91989	6.21217	0.0695282	5.88488	5.05423	-0.21952	6.72896	6.03773	-0.156378	0.448	0
POU3F3	chr9:41873622-41876409	6.0018	5.53689	-0.116321	6.01273	5.33152	-0.173473	5.42414	4.97854	-0.123671	5.15942	4.24158	-0.28261	5.68274	5.03508	-0.174572	0.4481	0
PAXBP1	chr11:31001488-31030927	11.8086	11.0532	-0.0953831	12.3146	9.99954	-0.300441	12.6858	13.7873	0.120121	14.5967	12.1617	-0.263296	12.8402	11.6494	-0.140414	0.44815	0
TMEM199	chr10:64617002-64621636	25.3197	25.8658	0.0307835	22.8644	27.8675	0.285476	33.4056	35.7703	0.0986704	35.1698	39.7189	0.175489	28.9759	31.8983	0.138627	0.44835	0
2700049A03RIK	chr6:93231508-93337598	2.70076	2.53227	-0.0929338	2.91703	2.39445	-0.284808	3.34747	3.54306	0.0819234	4.1512	3.33116	-0.317503	3.26147	2.91388	-0.162581	0.44845	0
POP4	chr1:90749091-90757426	22.4603	25.2288	0.167698	21.305	26.5919	0.319795	36.9265	38.2987	0.0526411	35.7701	38.7089	0.113912	28.7716	31.7473	0.141988	0.44845	0
SMARCC2	chr7:1743464-1771953	101.776	96.5186	-0.0765233	107.245	100.406	-0.0950618	98.1094	95.3648	-0.0409346	103.567	90.1065	-0.200862	103.027	95.5353	-0.10891	0.44845	0
ZMYM6NB	chr5:146568702-146572333	2.03345	2.774	0.448036	4.05851	3.61145	-0.168374	5.40108	5.676	0.0716272	3.54556	6.19582	0.805282	3.72145	4.46934	0.264197	0.44845	0
FAM173A	chr10:15057679-15059538	11.8377	12.9313	0.127478	11.7943	9.82041	-0.264237	21.3718	16.4434	-0.378199	22.5196	20.071	-0.166073	16.6348	14.5793	-0.190283	0.4485	0
SOX17	chr5:15241404-15246904	2.03393	2.28344	0.166939	2.4573	2.73004	0.151846	2.3261	2.87277	0.304532	2.09539	2.73311	0.383327	2.23343	2.63878	0.24061	0.44875	0
OSGIN1	chr19:49675214-49690479	0.676311	0.814309	0.267889	0.600341	0.917944	0.612624	1.30219	2.02556	0.63738	1.94719	1.90601	-0.0308361	1.10752	1.37915	0.316444	0.4489	0
PLEKHG1	chr1:34449583-34680057	24.3273	22.2645	-0.12783	24.1874	20.628	-0.229649	14.8257	17.524	0.241233	19.716	16.7147	-0.238243	21.0226	19.3697	-0.118137	0.4489	0
SLC26A6	chr8:113925197-113935378	5.78919	4.99893	-0.211743	6.29717	6.67664	0.0844194	7.332	7.37064	0.00758207	11.1827	8.39711	-0.413303	7.58409	6.78029	-0.161629	0.4491	0
ZFP606	chr1:72565071-72591810	4.62303	4.34894	-0.0881725	4.52015	3.85087	-0.231187	5.39351	4.79718	-0.169037	4.98214	4.28081	-0.218882	4.87302	4.29644	-0.181674	0.4491	0
UBE2O	chr10:106646997-106694575	34.578	33.1415	-0.0612169	35.2971	32.9224	-0.100479	34.1021	30.6235	-0.15522	32.6475	30.4566	-0.100219	34.2778	31.7856	-0.108902	0.44915	0
DHCR7	chr1:204245561-204258913	6.7301	7.65953	0.186627	7.85763	7.84212	-0.00284875	11.116	10.9547	-0.021088	8.42028	11.7962	0.48638	8.47377	9.43072	0.154364	0.44935	0
LOC691141	chr8:20629813-20648525	0.554943	0.599402	0.111184	0.943948	0.382172	-1.30449	1.56702	0.852292	-0.878602	1.20094	1.45124	0.27312	1.04991	0.799894	-0.392383	0.44935	0
CHST10	chr9:37851674-37881711	17.7119	16.3032	-0.119564	18.9244	16.9469	-0.159227	22.4849	19.6744	-0.192632	20.5164	20.3031	-0.0150708	19.8604	18.1607	-0.129074	0.44955	0
MYO5B	chr18:71381066-71580823	10.8905	12.1302	0.155535	10.5923	11.6998	0.143462	9.40257	11.2587	0.259913	9.21625	8.70095	-0.0830068	10.09	10.9795	0.121883	0.44965	0
LDOC1L	chr7:122565311-122570408	22.6323	21.8167	-0.0529452	22.1	20.1262	-0.134969	20.1123	18.2618	-0.139246	19.8953	18.2445	-0.124961	21.3027	19.6502	-0.116492	0.4497	0
ADAMTS3	chr14:19756886-19966599	8.39486	7.25188	-0.211152	8.4634	7.0404	-0.26558	4.91521	6.48389	0.399608	7.85586	6.18901	-0.344061	7.48906	6.74986	-0.149926	0.4502	0
LPP	chr11:77963581-78416872	2.72024	2.55325	-0.0914038	2.50709	1.97779	-0.342124	1.35938	1.63722	0.268291	1.68532	0.692831	-1.28245	2.10495	1.745	-0.270558	0.4504	0
TRMT2A	chr11:84731489-84736099	13.0609	11.2787	-0.211644	12.9952	10.9885	-0.24199	15.5546	13.6343	-0.190103	14.352	15.2755	0.0899706	13.9666	12.6643	-0.141217	0.4505	0
WDR89	chr6:98231300-98237690	14.5273	12.6905	-0.195016	16.1426	13.7903	-0.227225	15.1883	17.6851	0.219575	25.645	21.3483	-0.26456	17.7928	16.1492	-0.139828	0.4505	0
NOL4	chr18:14312204-14718842	11.066	9.78074	-0.178124	11.7511	10.8363	-0.116918	10.142	10.5145	0.0520341	9.83779	8.07322	-0.285191	10.7635	9.80588	-0.134429	0.45055	0
HIST1H2BK	chr17:50118775-50119156	4.18863	5.26225	0.329202	6.94785	4.03791	-0.782958	4.722	1.21614	-1.95708	3.84153	3.56873	-0.106268	4.96789	3.58387	-0.471114	0.45085	0
TMEM87A	chr3:106845249-106944283	9.66256	12.1023	0.324799	10.3104	11.0891	0.105043	11.9971	13.4989	0.170152	12.6344	13.4625	0.091587	11.1117	12.4528	0.164392	0.45085	0
TM7SF2	chr1:208700769-208705093	3.69056	4.79847	0.378737	3.84542	4.21714	0.133125	6.46136	6.91202	0.0972687	6.54105	8.07392	0.303748	5.06889	5.89714	0.218346	0.451	0
UIMC1	chr17:15579708-15644887	17.1048	15.0065	-0.188816	17.6496	15.6724	-0.171407	19.9595	19.9591	-2.69e-05	20.1777	18.3268	-0.138809	18.6904	17.0833	-0.129707	0.4512	0
NOVA2	chr1:78293285-78317998	8.63421	5.84285	-0.563391	6.7555	6.40253	-0.0774198	9.77297	10.5015	0.103724	11.5209	9.45529	-0.285065	9.11441	7.91334	-0.203862	0.45125	0
SCN7A	chr3:48633301-48710728	1.008	0.792065	-0.347811	0.424143	0.795172	0.906718	2.09921	1.05963	-0.98629	0.859382	1.07564	0.323819	1.07678	0.920117	-0.226828	0.45125	0
DDX17	chr7:117536188-117566504	296.629	268.713	-0.142595	318.301	280.561	-0.182076	345.438	341.36	-0.0171327	383.573	339.056	-0.177979	335.207	304.685	-0.137734	0.4513	0
KDM1B	chr17:23655642-23695480	7.12185	8.16832	0.197788	6.1368	7.63177	0.31453	6.84867	7.32988	0.0979653	7.64183	7.45979	-0.0347833	6.93912	7.64531	0.139822	0.4513	0
COA4	chr1:157965118-157968348	5.75495	8.71873	0.599315	6.79465	6.70151	-0.0199144	6.58547	6.84497	0.055758	6.62197	7.42853	0.165815	6.44388	7.42641	0.204736	0.45135	0
EZH2	chr4:75709958-75773279	2.46273	1.68562	-0.546977	1.9501	2.11477	0.116955	3.97952	2.68221	-0.569173	3.04761	3.39762	0.156849	2.82832	2.42929	-0.21941	0.4515	0
9930021J03RIK	chr1:233432437-233514993	14.4186	12.94	-0.156094	12.1629	11.6762	-0.0589055	13.3139	13.1805	-0.0145218	13.6321	12.0297	-0.180403	13.412	12.4194	-0.110929	0.4516	0
MACROD2	chr3:128575172-128616232	0.779076	0.647358	-0.2672	0.907571	0.75114	-0.272929	1.97853	1.53315	-0.36793	1.47928	1.15443	-0.357718	1.26275	0.999289	-0.337594	0.45185	0
RUNX1T1	chr5:28181388-28340984	30.0636	26.8458	-0.163319	27.8782	25.6602	-0.119607	22.7955	23.9463	0.0710517	21.3456	17.8225	-0.26024	25.7777	23.6742	-0.122806	0.45185	0
NTN1	chr10:54946976-55134217	1.00852	0.914406	-0.141337	1.36065	1.2413	-0.132444	0.737385	0.469516	-0.651243	0.920292	0.405903	-1.18095	1.01914	0.774803	-0.395458	0.45195	0
ALKBH7	chrUn:24764601-24766734	8.02159	8.30232	0.0496258	7.48652	8.71987	0.220012	12.1865	14.4535	0.246134	13.0432	15.9329	0.288711	10.0727	11.6217	0.206366	0.4521	0
CA10	chr10:81732106-82239596	63.5012	57.2617	-0.149212	62.5894	55.539	-0.172418	60.1795	58.2294	-0.0475242	52.9219	51.8477	-0.0295855	60.1109	55.6282	-0.111809	0.45215	0
TCERG1	chr18:35716852-35778041	35.4835	32.4222	-0.130164	36.8502	33.9247	-0.119337	41.801	41.5007	-0.010401	47.311	43.0263	-0.136958	40.2277	37.3516	-0.107019	0.45215	0
BHLHE23	chr3:169886342-169888557	22.887	20.7178	-0.143656	24.0589	20.8474	-0.206703	21.1662	19.1524	-0.144238	21.2819	21.5725	0.0195625	22.4643	20.5367	-0.129429	0.4522	0
NMRK1	chr1:222230109-222257462	3.09195	3.27174	0.0815436	3.20847	3.83281	0.256518	3.3369	4.4446	0.413545	4.34237	5.04816	0.217274	3.48548	4.10264	0.235193	0.4525	0
ZFP819	chr1:94009047-94019562	2.25789	2.26805	0.00647641	2.01251	2.29152	0.187304	1.04532	2.26442	1.11519	1.43323	1.29583	-0.145391	1.71788	2.03981	0.247809	0.45275	0
RAD17	chr2:31424503-31454313	9.53969	8.84906	-0.108417	9.20767	7.4216	-0.311105	12.5129	11.7083	-0.0958732	11.9784	11.5198	-0.0563167	10.7528	9.74811	-0.141521	0.4528	0
FAM210A	chr18:64711763-64752197	10.9267	10.2004	-0.0992372	10.377	9.58286	-0.114864	12.1652	11.9798	-0.0221591	12.0792	10.6676	-0.179298	11.3727	10.5395	-0.109774	0.4529	0
ALKBH2	chr12:43531681-43536317	5.98969	4.78168	-0.324965	7.61303	5.10531	-0.576473	6.66249	7.10649	0.0930764	7.20097	6.92496	-0.056386	6.87809	5.90209	-0.220783	0.4531	0
SMN1	chr2:31147742-31159933	10.6628	12.7241	0.254976	13.6859	14.3428	0.0676365	20.8002	22.8385	0.134872	23.9328	27.647	0.20813	17.0236	18.987	0.157476	0.45315	0
SNRPD2	chr1:78509141-78511992	69.4869	95.9837	0.466049	91.7945	84.8918	-0.112781	88.8157	84.0655	-0.0792999	80.4106	101.167	0.331277	82.6632	91.2659	0.14283	0.45315	0
GALNS	chr19:52859281-52890422	3.44938	2.91306	-0.243801	4.41012	4.17224	-0.079997	5.34189	3.78714	-0.496244	3.46415	3.28125	-0.0782541	4.15768	3.52803	-0.236913	0.45345	0
PLEK	chr14:97841594-97875052	5.28745	4.04302	-0.387138	3.79155	3.78043	-0.00423709	8.91011	6.54168	-0.445782	5.3618	6.0442	0.172835	5.77231	5.01838	-0.201927	0.4535	0
TMEM67	chr5:26324624-26377531	11.472	10.4386	-0.136193	11.3331	11.5235	0.0240319	14.2975	14.1472	-0.0152429	18.0784	14.7664	-0.29195	13.6996	12.5819	-0.122782	0.4536	0
TMEM132E	chr10:70584514-70640639	6.71823	5.64925	-0.250021	6.51921	6.67538	0.0341547	7.34684	7.32313	-0.00466192	6.03505	10.156	0.750889	6.66611	7.35461	0.141802	0.45385	0
GMEB1	chr5:151112530-151143840	17.3932	15.6387	-0.1534	18.6969	15.7152	-0.250642	12.5108	13.212	0.0786761	12.9139	11.3626	-0.184641	15.5662	14.0503	-0.147811	0.454	0
TPCN1	chr12:37140427-37227711	18.6202	18.2396	-0.0297974	19.6285	21.6957	0.14446	22.6279	25.8824	0.193868	23.0801	25.8126	0.161426	20.9323	22.6695	0.115021	0.454	0
SOX8	chr10:14818954-14823943	10.4596	11.3301	0.115327	10.9142	11.4683	0.0714477	16.5961	17.2627	0.0568172	12.1885	15.1439	0.313215	12.4542	13.622	0.129312	0.45425	0
PXK	chr15:18744747-18815195	15.3326	13.5169	-0.18184	15.5662	14.143	-0.138325	21.8229	20.4143	-0.0962675	19.7167	18.7013	-0.0762797	17.9964	16.4792	-0.127065	0.45435	0
A630007B06RIK	chr1:263095826-263118602	39.7789	35.1917	-0.176767	38.8552	38.0844	-0.0289048	30.1584	31.7166	0.0726762	31.1495	24.6491	-0.337673	35.3185	32.5813	-0.116376	0.4547	0
LOC297756	chr5:2501288-2505579	13.1119	14.155	0.110434	12.9913	17.1027	0.396685	6.98958	8.13684	0.219263	5.63218	6.24771	0.149633	9.89356	11.6329	0.233654	0.4548	0
MAPK4	chr18:70706343-70855653	19.6338	20.6466	0.0725629	15.1552	18.2453	0.26771	16.574	16.547	-0.00235258	12.3227	14.0871	0.193058	16.0403	17.4676	0.122984	0.4548	0
PID1	chr9:83411056-83630122	18.1915	27.0074	0.570087	23.7752	30.0488	0.337847	20.8402	23.3384	0.163338	22.9551	18.1191	-0.341302	21.4623	24.7985	0.208449	0.4548	0
DENND4B	chr2:182509109-182523437	23.5417	23.6663	0.00761383	26.7184	22.982	-0.217329	25.3484	25.3564	0.000454752	26.5429	23.3178	-0.186899	25.5735	23.7433	-0.107127	0.4549	0
TOP3A	chr10:46886322-46923699	3.24338	4.11591	0.343711	3.33746	4.24396	0.346658	2.57321	2.57779	0.00256626	2.52667	2.36326	-0.0964576	2.94798	3.36866	0.19245	0.4549	0
CALHM2	chr1:252454944-252460671	1.78185	3.39677	0.930789	1.81362	1.66743	-0.121244	3.43653	2.69143	-0.352581	2.28509	3.24339	0.505249	2.30212	2.73295	0.247501	0.4554	0
CDH8	chr19:5685815-6015796	11.9606	10.8856	-0.135869	10.8839	10.3534	-0.0720963	12.1521	10.9068	-0.155989	10.5992	9.33858	-0.182679	11.4256	10.3615	-0.141027	0.4555	0
SMC5	chr1:226494136-226566143	19.4374	17.6131	-0.142186	18.4063	16.1375	-0.189782	19.6399	20.0067	0.0266965	21.0485	19.5736	-0.104807	19.6433	18.2029	-0.109868	0.45555	0
CAMK1G	chr13:109192832-109216471	7.07776	6.16765	-0.198572	7.3971	5.80607	-0.349397	5.86698	6.27895	0.0979056	6.90783	6.18448	-0.159581	6.8545	6.08781	-0.171129	0.4556	0
RIIAD1	chr2:189437145-189445102	0.447746	0.482771	0.108659	0.981697	0.431642	-1.18544	0.778254	2.03246	1.38491	0.618876	1.71242	1.46831	0.707751	1.11922	0.661181	0.45565	0
DHX58	chr10:89630144-89641463	4.21798	4.88639	0.212216	2.45541	4.22277	0.782226	6.37618	4.63786	-0.459233	4.24158	5.90508	0.477355	4.27481	4.88111	0.191349	0.4558	0
ARHGEF5	chr4:71029369-71053495	1.32921	1.48865	0.163439	0.997973	1.04713	0.069372	1.27495	1.54119	0.273606	1.06212	1.40637	0.405026	1.16869	1.36198	0.22082	0.45585	0
HDDC2	chr1:26955258-26975139	12.4488	10.9636	-0.183273	16.7696	11.6525	-0.525211	13.5762	13.7355	0.0168289	11.7189	11.7294	0.00128993	13.7071	11.9466	-0.198319	0.456	0
RABGEF1	chr12:27497544-27544584	60.8307	55.0159	-0.14495	64.8922	58.4969	-0.149686	37.9897	42.3947	0.158276	60.8715	50.8823	-0.258603	56.7033	51.8772	-0.128334	0.4561	0
CLN8	chr16:79567371-79580173	11.0684	11.9757	0.113655	10.0747	12.4189	0.301799	14.7713	15.4	0.0601332	13.6747	15.0738	0.14053	12.3217	13.5916	0.141507	0.45625	0
DAXX	chr20:5121853-5127601	18.0701	16.8023	-0.104947	20.5089	16.5195	-0.312081	21.2831	23.176	0.122927	26.1857	22.9981	-0.187262	21.4432	19.6326	-0.127272	0.4563	0
BEST3	chr7:56313735-56355104	5.69378	5.46052	-0.0603486	5.42901	4.4622	-0.282934	5.79771	6.08395	0.0695249	6.06601	4.59957	-0.399249	5.75061	5.12877	-0.1651	0.45655	0
NHEJ1	chr9:74309151-74408397	0.429324	1.54578	1.8482	1.31635	1.17279	-0.166596	1.02789	0.937635	-0.132586	1.02834	1.20556	0.229387	0.947144	1.22192	0.367494	0.4566	0
TCEA2	chr3:170831270-170839091	20.0203	25.7083	0.360775	24.3904	22.3265	-0.127557	23.5943	27.6322	0.227915	23.831	26.6374	0.160617	22.9653	25.4257	0.146834	0.45665	0
LSP1	chr1:202707304-202741026	5.50309	4.38928	-0.326257	4.94962	4.73432	-0.0641594	8.8644	6.8085	-0.380686	6.32155	6.24629	-0.0172779	6.35297	5.47117	-0.215584	0.45685	0
KCNJ8	chr4:180144083-180149935	4.82179	5.54669	0.20206	5.62279	5.43376	-0.0493352	4.73177	6.73891	0.510134	5.42807	6.36011	0.228611	5.16775	5.97349	0.209035	0.4569	0
NDUFA5	chr4:50649499-50657853	131.844	117.327	-0.168292	135.382	121.393	-0.157353	136.186	130.573	-0.060713	141.427	132.286	-0.0963932	136.391	124.724	-0.129005	0.45715	0
ZFP446	chr1:72941955-72950042	9.82242	9.51292	-0.0461898	11.4304	8.93797	-0.354852	6.93666	6.97744	0.00845602	8.23809	7.8304	-0.073224	9.21559	8.35107	-0.142116	0.45715	0
BNIP3	chr1:198683008-198700111	123.94	111.841	-0.148198	129.409	118.793	-0.123481	118.657	107.48	-0.142731	115.261	117.255	0.0247484	122.368	113.652	-0.10661	0.45735	0
CHPF2	chr4:5959922-5965385	14.6739	14.5513	-0.0121035	17.4923	15.1376	-0.208576	15.2526	13.7938	-0.145036	15.1234	13.7268	-0.139786	15.6938	14.3	-0.134179	0.45735	0
ARHGAP25	chr4:121620925-121700835	2.31848	1.6992	-0.448325	2.07497	2.55292	0.299063	4.5722	3.38563	-0.433466	2.57118	2.30713	-0.156333	2.84806	2.45677	-0.213219	0.4574	0
GLI3	chr17:57590928-57867710	3.00661	3.38354	0.170394	2.58274	3.17569	0.29817	2.92194	3.07782	0.0749798	2.47237	2.79939	0.179222	2.75489	3.11223	0.175955	0.4584	0
HPGD	chr16:37419900-37457896	3.77705	1.69479	-1.15616	2.45128	3.30547	0.431318	5.00019	3.87759	-0.366822	3.41641	3.63021	0.0875733	3.63725	3.079	-0.240388	0.45845	0
TTF1	chr3:8062918-8087459	3.34185	3.17014	-0.0760989	2.87698	3.51021	0.287004	2.52434	3.4896	0.467151	2.92397	3.2381	0.147218	2.93611	3.34265	0.187086	0.45845	0
DENND4A	chr8:69056632-69171038	27.3701	27.4568	0.00456076	24.2213	27.2401	0.169454	33.3027	40.9487	0.298179	36.3997	35.6427	-0.0303213	30.148	32.411	0.104424	0.45855	0
SLC25A12	chr3:53545342-53670354	27.9989	26.198	-0.0959123	24.2569	27.7978	0.196579	28.7427	34.6298	0.268817	31.0634	34.5499	0.153465	27.9841	30.4882	0.123643	0.4588	0
LHPP	chr1:192082901-192174599	20.2569	22.3335	0.1408	21.6537	23.2177	0.100613	21.2913	23.0713	0.115838	19.9906	23.2998	0.221	20.8519	22.9119	0.13592	0.45885	0
SCARF2	chr11:85164351-85175734	1.94337	1.66215	-0.225506	1.77901	1.35323	-0.394664	1.75371	2.25462	0.362473	1.56969	3.15366	1.00655	1.77114	2.06553	0.221831	0.4589	0
EMCN	chr2:234892270-234972225	2.11368	1.96817	-0.102898	3.23395	2.10815	-0.617324	4.0858	3.48097	-0.23113	3.6941	3.51408	-0.0720775	3.25275	2.7169	-0.259703	0.4595	0
GABRA4	chr14:39047057-39124397	16.3805	15.7275	-0.0586886	16.2475	13.2285	-0.296569	12.5438	12.4268	-0.0135291	12.3208	10.1427	-0.280659	14.5175	12.9509	-0.164746	0.4595	0
USP51	chrX:38541806-38544854	1.16559	0.564466	-1.0461	1.0862	0.85254	-0.349451	0.697599	0.6293	-0.148651	0.830706	1.03276	0.314092	0.957945	0.763912	-0.326537	0.4598	0
SPINT1	chr3:105757665-105770345	3.40951	3.99025	0.226917	2.93978	3.63948	0.308023	5.01498	5.33723	0.0898485	3.73923	4.36051	0.221754	3.74859	4.29045	0.194782	0.4599	0
SPATA13	chr15:39722432-39852744	5.14567	4.51834	-0.187564	4.89622	4.1469	-0.239636	3.9588	3.20308	-0.305603	2.56836	2.83781	0.143927	4.19962	3.70789	-0.179659	0.46	0
DENND1C	chrUn:24699833-24700900	0.388256	0.419264	0.110853	0.701649	0.623873	-0.169497	3.53397	2.71617	-0.379713	2.75157	1.82767	-0.59025	1.77223	1.33985	-0.403497	0.46015	0
IMPA2	chr18:63809335-63840069	2.51905	2.96825	0.236734	1.81763	2.79669	0.62166	3.43866	3.58086	0.0584603	2.5741	3.0323	0.236342	2.56878	3.07437	0.25921	0.4603	0
TAF1A	chr13:99475708-99484662	5.22197	3.62518	-0.526543	6.20041	5.15447	-0.266539	8.54895	7.19338	-0.249077	9.48264	9.35794	-0.0190985	7.28747	6.1985	-0.233499	0.4604	0
YBEY	chr20:12580867-12590344	1.72213	1.39011	-0.308999	2.15967	1.75583	-0.298656	1.9289	1.80036	-0.0995005	2.08798	1.97896	-0.0773646	1.97718	1.71709	-0.203485	0.4604	0
ECT2	chr2:112969259-113031354	1.52347	1.36379	-0.159738	1.76337	1.19607	-0.560033	1.32615	1.13491	-0.224664	1.51602	1.59164	0.0702248	1.54229	1.31635	-0.22853	0.4605	0
WBP4	chr15:61515839-61543453	21.009	21.1279	0.00813608	20.6286	17.6247	-0.227048	19.5158	18.4276	-0.0827739	21.3324	17.8842	-0.254364	20.6859	18.7634	-0.140722	0.4605	0
TOMM34	chr3:154995685-155012576	14.4693	14.8236	0.0348984	14.1867	14.0114	-0.0179437	18.0819	20.4296	0.176113	16.1862	20.7474	0.358166	15.6849	17.276	0.13939	0.46055	0
FBXL4	chr5:37156863-37230228	8.44739	9.25701	0.13204	8.88328	10.7545	0.275772	9.92192	10.7923	0.121314	9.17347	9.93147	0.11454	9.10092	10.1461	0.156834	0.46065	0
PPP1R17	chr4:84846563-84863278	7.21565	7.61329	0.0773909	9.92171	6.903	-0.523366	9.55914	9.16765	-0.0603301	9.78312	8.9837	-0.122983	9.10704	8.09349	-0.170221	0.46065	0
ABCC1	chr10:449385-575705	20.381	19.3742	-0.0730883	21.2884	17.7436	-0.26277	15.6114	18.8236	0.269941	19.3442	15.52	-0.317778	19.3038	17.8659	-0.111674	0.46085	0
PCDHB2	chr18:30104782-30107179	4.97344	4.41493	-0.171854	4.54247	4.27474	-0.0876388	4.52701	3.71542	-0.285034	3.38985	2.85436	-0.248056	4.38953	3.83768	-0.193833	0.46085	0
RAD51AP1	chr4:163308787-163321854	2.25221	1.8118	-0.313915	2.1762	2.77208	0.34916	2.68487	3.28857	0.292608	2.17712	3.19566	0.553693	2.32099	2.73013	0.23423	0.46105	0
BEND6	chr9:32608632-32656071	56.5051	59.6962	0.0792562	53.033	61.549	0.214845	34.9076	40.3976	0.210727	31.7626	33.1073	0.0598176	44.7652	49.287	0.13883	0.4614	0
PDCD11	chr1:252413499-252454618	14.3264	12.7946	-0.163142	14.5732	13.6671	-0.0926161	17.7523	18.7592	0.0795905	19.555	16.554	-0.240359	16.4746	15.2708	-0.109471	0.4614	0
TSC22D1	chr15:57404928-57502817	230.293	246.03	0.0953651	239.765	252.307	0.073559	286.583	302.775	0.0792908	293.55	355.829	0.277581	261.605	286.13	0.129284	0.4615	0
IGSF21	chr5:158819579-159148045	25.6451	20.6482	-0.31267	21.7213	23.3795	0.106135	39.4766	38.6069	-0.0321404	49.5237	42.3472	-0.225852	33.6055	30.6098	-0.134705	0.46165	0
ADIPOR2	chr4:155661297-155726111	36.4248	44.8427	0.299951	34.6924	48.5415	0.484601	32.2183	31.304	-0.0415323	32.3127	31.4416	-0.0394273	34.0878	39.3963	0.208806	0.4617	0
CD63	chr7:2208658-2211323	85.1658	94.6853	0.152867	94.8379	107.549	0.181456	218.045	196.763	-0.148173	147.115	194.82	0.405193	133.819	145.216	0.117914	0.4619	0
PCDHB20	chr18:30316116-30319496	4.65805	4.94679	0.0867656	4.27419	5.50842	0.365989	5.57919	6.01337	0.108119	4.93848	5.28777	0.0985923	4.85062	5.41213	0.158027	0.46195	0
ETV4	chr10:90808438-90824019	4.05459	3.69409	-0.134338	5.36036	3.8238	-0.487322	14.6161	9.0606	-0.689879	10.8418	12.9336	0.25452	8.50093	7.14274	-0.251143	0.462	0
SBSN	chr1:85796214-85800682	0.202663	0.671572	1.72846	0.883866	0.602414	-0.553072	3.68017	2.35781	-0.642324	3.89725	2.43297	-0.679737	2.078	1.45991	-0.509316	0.4621	0
CDC45	chr11_random:1197092-1221894	0.878608	1.33993	0.608866	1.39727	1.99319	0.51247	0.820782	1.52874	0.89727	1.59139	0.87994	-0.854811	1.17375	1.44472	0.299661	0.46215	0
ZFP366	chr2:30176190-30238051	1.09015	1.65618	0.603336	1.21501	1.74083	0.518806	0.948812	0.775783	-0.290469	0.853903	0.745164	-0.196516	1.0362	1.25476	0.276104	0.46215	0
A430105I19RIK	chr3:105257836-105266089	3.09435	3.46878	0.164796	4.12222	3.18532	-0.371985	3.30552	2.71854	-0.282048	2.30733	1.93775	-0.251838	3.2344	2.85119	-0.181934	0.4622	0
RAB39A	chr8:57156016-57173029	20.638	19.7774	-0.0614501	27.9363	24.3635	-0.19742	20.1521	18.692	-0.108513	21.0753	15.9332	-0.403516	22.6006	19.78	-0.192322	0.4626	0
IL12A	chr2:158710260-158717689	0.931931	0.167707	-2.47428	0.337134	1.19798	1.8292	0.613433	1.26502	1.04418	1.37696	2.05099	0.574828	0.808874	1.1368	0.490995	0.46265	0
WDR18	chr7:11253372-11261805	31.1944	28.0637	-0.152579	31.0303	28.6289	-0.116205	34.5084	29.5381	-0.224369	33.2373	33.0147	-0.00969558	32.4887	29.6519	-0.131814	0.4628	0
TSEN34	chr1:63830250-63837492	51.4132	60.1652	0.22679	57.9943	58.325	0.00820443	65.4823	69.8491	0.0931375	64.2273	72.0828	0.166467	59.6208	64.5992	0.115701	0.46305	0
SEC24D	chr2:219987951-220096798	1.52963	2.05106	0.423186	1.48118	1.65806	0.162745	2.9726	2.5282	-0.233617	2.10381	3.10494	0.561564	1.99547	2.30173	0.205991	0.46315	0
ZNRF1	chr19:41454827-41553996	15.7416	15.3594	-0.035459	17.1021	16.0553	-0.0911236	17.2638	15.8791	-0.120615	18.0744	15.4205	-0.229094	17.0503	15.6416	-0.12441	0.46335	0
SERPINB6	chr17:37316388-37335124	5.36994	4.90162	-0.131648	5.97564	5.90656	-0.0167751	9.75973	9.8329	0.0107763	7.01657	12.0799	0.783769	6.96339	7.99207	0.198779	0.4637	0
PUS10	chr14:104553748-104634566	5.44776	4.45878	-0.289016	4.99514	4.2635	-0.228487	4.96397	4.25125	-0.223606	5.06008	3.96052	-0.353469	5.13566	4.23126	-0.279462	0.4638	0
ENHO	chr5:59060147-59062149	12.8864	15.6046	0.276122	14.6978	14.8714	0.0169372	33.825	24.1507	-0.486025	20.4258	17.6281	-0.212519	20.0979	17.8485	-0.171241	0.464	0
UTP14A	chrX:134625489-134653441	4.56079	4.77913	0.067463	5.27627	4.26536	-0.306852	9.15884	8.51038	-0.105941	9.59174	7.861	-0.287078	7.03688	6.2286	-0.176026	0.46455	0
RADIL	chr12:12420876-12485651	6.91974	7.50196	0.11655	7.55391	7.96898	0.0771714	5.48003	6.65571	0.280409	6.70643	7.60502	0.181407	6.71509	7.43303	0.146544	0.4647	0
RGD1561328	chr7:114707098-114708549	16.4094	13.6	-0.270916	17.7635	15.6643	-0.181436	21.2977	19.7559	-0.108413	22.0572	21.3548	-0.0466876	19.2969	17.3699	-0.15178	0.4649	0
UTP11L	chr5:144003626-144018513	36.3225	32.126	-0.177123	42.0894	35.3484	-0.25181	46.3062	39.9933	-0.21145	41.2718	45.2383	0.132389	41.4478	37.8139	-0.132379	0.4649	0
ZFP120	chr3:140420898-140448417	0.660662	0.778531	0.236842	1.16944	0.405346	-1.52859	2.60234	2.04854	-0.345214	2.24917	2.17493	-0.048424	1.62994	1.3033	-0.322656	0.46495	0
CITED1	chrX:90301066-90305762	4.36198	4.40623	0.0145634	3.96841	5.42637	0.451425	9.78957	11.4346	0.224086	11.8906	14.2463	0.260765	7.33515	8.617	0.23236	0.4653	0
GPX7	chr5:129506985-129514830	3.30484	3.22375	-0.0358376	3.46515	3.90576	0.172684	4.66363	6.059	0.377627	4.23913	5.7722	0.445352	3.89603	4.65659	0.25727	0.4654	0
THAP7	chr11:85474475-85477575	9.24721	10.5042	0.183875	8.70651	11.886	0.449099	12.9049	14.6051	0.178546	14.0311	13.9342	-0.0099971	11.1242	12.6063	0.180445	0.46555	0
S1PR1	chr2:211851303-211855511	20.4256	22.567	0.143838	18.7245	22.9928	0.296251	22.3709	20.3618	-0.135763	17.8531	20.3111	0.186096	19.8683	21.5798	0.119211	0.46575	0
ZFP641	chr7:137021617-137031750	3.60638	3.40652	-0.0822518	3.89585	3.53672	-0.139525	5.08342	4.33362	-0.230226	4.27359	3.87551	-0.141063	4.19635	3.75952	-0.158585	0.46575	0
FLOT1	chr20:3065791-3076166	48.0976	48.3069	0.0062627	52.6429	51.1759	-0.040774	92.3905	69.2497	-0.415937	59.3088	65.3896	0.140814	62.4602	57.8532	-0.11054	0.46585	0
SGMS1	chr1:236131993-236396632	42.5887	40.5443	-0.0709723	47.4055	40.3985	-0.230752	36.0625	33.9933	-0.0852491	35.8297	34.2924	-0.0632706	40.8186	37.4095	-0.125822	0.46585	0
PLEKHB1	chr1:158081931-158096197	194.495	189.376	-0.038476	217.164	196.481	-0.144394	249.062	244.002	-0.0296079	298.983	268.397	-0.155695	238.625	222.112	-0.103459	0.46595	0
1700011I03RIK	chr18:53301858-53526165	1.5666	1.17124	-0.419603	1.95941	1.97512	0.0115224	3.22348	3.08422	-0.063713	3.0703	1.61961	-0.922735	2.42052	1.9325	-0.324847	0.466	0
COL8A1	chr11:43604973-43737050	0.895828	1.93753	1.11292	0.870282	1.07779	0.308523	1.18766	0.298168	-1.99392	0.645204	1.13323	0.812615	0.899854	1.13462	0.334451	0.4661	0
SAPCD2	chr3:3538476-3543730	2.5554	2.13925	-0.256446	1.45142	2.58696	0.833788	1.05261	1.23574	0.231406	0.81376	1.27719	0.650302	1.50322	1.83821	0.290244	0.4663	0
ZCCHC8	chr12:34007439-34031260	20.9642	17.2468	-0.281604	19.4431	18.8463	-0.0449787	19.7632	19.1904	-0.0424348	21.5134	20.4055	-0.0762812	20.4626	18.8219	-0.120577	0.4663	0
SPR	chr4:119365577-119369311	15.674	12.0655	-0.377487	13.956	12.889	-0.114741	12.5627	10.3843	-0.274734	10.1621	11.3905	0.164627	13.2157	11.7017	-0.175536	0.4664	0
MFGE8	chr1:134870028-134885433	124.689	133.352	0.0969078	136.694	136.101	-0.0062702	161.41	205.667	0.349581	195.853	195.565	-0.00212439	153.718	165.27	0.104544	0.4665	0
SYNGR3	chr10:13938376-13943131	49.4634	51.7172	0.0642818	54.6585	47.1842	-0.212142	42.8389	37.2583	-0.201358	40.8981	36.6826	-0.156934	47.3556	43.4914	-0.122805	0.46655	0
SLC26A7	chr5:28899538-29035178	1.46483	1.84621	0.333831	1.53951	1.37309	-0.165051	0.903756	0.987233	0.127458	1.2611	2.12218	0.750869	1.30795	1.58121	0.273722	0.4668	0
RGD1309148	chr5:93253889-93254986	19.1927	18.8277	-0.0277045	17.5901	21.6314	0.298364	19.3034	21.4191	0.15004	18.9488	23.0386	0.281952	18.7837	21.1141	0.168727	0.4669	0
AIFM3	chr11:85496301-85512831	3.60487	2.91176	-0.308054	3.31339	3.52226	0.0881906	3.77741	4.93507	0.385671	3.87374	5.47563	0.499297	3.64114	4.14024	0.185325	0.46695	0
MNAT1	chr6:95548844-95698573	11.7218	11.6343	-0.0108059	12.7739	10.2323	-0.320059	16.6814	16.8476	0.0143059	17.9976	14.499	-0.311849	14.685	13.1296	-0.161527	0.467	0
WBSCR27	chr12:22822274-22830815	3.62953	2.85002	-0.348813	3.58214	2.38585	-0.58632	4.00062	3.89117	-0.0400192	3.83525	3.01109	-0.349032	3.76164	3.0025	-0.325198	0.4671	0
PDGFC	chr2:172634896-172812354	3.33378	1.97553	-0.754917	1.32241	1.86554	0.496427	3.05317	2.34591	-0.380156	2.57902	2.10819	-0.290817	2.56585	2.05966	-0.317033	0.4676	0
DTX3L	chr11:66649507-66659119	3.27407	3.96496	0.276219	2.99247	4.40554	0.557982	6.45006	4.20095	-0.618598	3.21839	5.018	0.640774	3.9385	4.37362	0.151183	0.4682	0
SLC25A27	chr9:13002822-13028531	13.5629	14.6896	0.115137	14.9561	12.4129	-0.268895	14.2109	14.0806	-0.0132823	15.0518	11.7224	-0.360667	14.469	13.2171	-0.130554	0.46825	0
S100A3	chr2:182881053-182883821	6.08416	4.15965	-0.548595	4.62966	5.27911	0.189388	3.6595	6.46245	0.820434	5.09548	8.57326	0.750628	4.91149	6.01839	0.293215	0.4683	0
BAG2	chr9:32491166-32493676	6.26405	6.38171	0.0268454	5.08395	4.94134	-0.0410467	6.37989	7.68301	0.26814	6.4403	9.05106	0.490959	6.03709	6.91849	0.196605	0.46855	0
TMEM129	chr14:82761552-82766583	12.351	9.71944	-0.345682	10.1945	9.24503	-0.141044	13.7298	12.083	-0.184341	11.8648	13.0633	0.138831	12.0192	10.909	-0.139822	0.46855	0
GTF2B	chr2:240877325-240895650	20.768	20.5618	-0.0143946	24.2566	21.4318	-0.178626	33.7993	28.8697	-0.227437	31.8303	30.1753	-0.0770329	27.4271	24.9406	-0.137107	0.4687	0
NDUFS7	chr7:10963915-10971188	80.5403	63.3791	-0.345703	80.2869	74.0251	-0.11715	92.3218	90.4297	-0.0298735	100.654	100.431	-0.00319865	88.2201	81.0488	-0.122318	0.4689	0
AP5B1	chr1:208213956-208217976	4.57047	3.82548	-0.256702	4.66676	4.76983	0.0315148	4.84664	4.12009	-0.234311	4.51716	3.94243	-0.196331	4.65868	4.16099	-0.162997	0.469	0
DYRK1B	chr1:83281270-83288788	32.6186	30.3076	-0.106015	35.2461	28.3684	-0.313179	32.5626	34.0142	0.0629204	35.545	34.1895	-0.056094	34.0729	31.5032	-0.113126	0.469	0
RRH	chr2:227256645-227266897	44.8752	43.1099	-0.0578983	50.2826	44.1287	-0.18834	70.3262	59.6913	-0.236542	68.6066	65.8579	-0.0589913	58.0274	52.4913	-0.144657	0.46905	0
MYH6	chr15:33044505-33068098	2.15032	2.27618	0.0820673	2.24397	2.18532	-0.0382123	1.76659	1.9356	0.131816	3.62127	2.30547	-0.651436	2.44087	2.17405	-0.167012	0.46925	0
CST3	chr3:137650906-137654776	1829.97	1925.27	0.0732452	1941.13	2153.23	0.149607	2787.86	2483.2	-0.166958	1969.19	2740.86	0.477028	2121.23	2302.5	0.118299	0.4694	0
SEMA3G	chr16:6651365-6662999	4.42776	4.46653	0.0125795	3.67374	4.5049	0.294248	2.15602	3.45504	0.680331	2.50936	2.11297	-0.248043	3.24994	3.67706	0.178139	0.4699	0
CCDC136	chr4:56279732-56307162	44.5192	38.7234	-0.201223	42.2954	40.153	-0.0749933	39.5316	37.639	-0.0707762	35.1516	34.3689	-0.0324859	40.6369	37.7312	-0.107033	0.46995	0
RAB20	chr16:82871001-82895146	0.744972	1.24362	0.739292	1.68542	1.6977	0.0104733	2.78465	2.35357	-0.242648	1.37717	2.80639	1.02701	1.62318	1.98639	0.291322	0.47	0
TMEM37	chrUn:57589312-57595934	1.12026	1.31097	0.226799	2.4402	1.63861	-0.574532	2.33239	3.5442	0.603647	1.91509	4.04964	1.08038	1.94419	2.55906	0.396443	0.47005	0
ASAH1	chr16:54279173-54311106	58.4326	62.1389	0.0887239	59.6387	64.2825	0.108178	61.2912	64.1789	0.066418	56.9817	65.28	0.196143	59.2129	63.7681	0.106924	0.47015	0
GABRR3	chr11:41667753-41720246	11.482	12.1253	0.078652	10.802	9.97817	-0.114453	11.7333	9.70001	-0.274549	11.6277	9.12592	-0.349525	11.4237	10.2606	-0.154909	0.47025	0
DOPEY1	chr8:91706266-91810010	14.7373	14.2571	-0.0477904	14.5524	13.6994	-0.0871451	16.0155	16.483	0.0415086	17.7884	14.4093	-0.303929	15.7504	14.6327	-0.106186	0.47035	0
ZNHIT2	chr1:208699135-208700417	12.1742	11.4263	-0.0914678	12.013	14.4907	0.270533	12.9642	16.8563	0.37876	15.5843	16.8712	0.114465	13.1585	14.7526	0.164971	0.47045	0
THNSL2	chr4:104329516-104348465	5.56993	5.59981	0.00772078	4.6523	5.47655	0.235323	5.77849	6.04235	0.0644162	4.89554	6.90129	0.495398	5.22942	5.96292	0.189369	0.4706	0
ANO4	chr7:25641688-25971720	2.19793	2.82516	0.362191	1.69018	2.22921	0.399361	2.89029	2.40703	-0.26396	2.03508	2.81222	0.466625	2.19279	2.56086	0.223857	0.47085	0
NEUROD2	chr10:87096768-87100963	21.9672	19.9232	-0.140903	19.2465	19.0311	-0.0162392	15.3741	13.0943	-0.231567	15.0456	12.8098	-0.232099	18.1075	16.3743	-0.145148	0.47085	0
PRELID2	chr18:35060005-35154166	2.25542	1.39154	-0.696711	1.74875	1.70851	-0.0335841	0.95191	1.54645	0.700062	2.5884	1.17842	-1.13521	1.90122	1.45778	-0.383153	0.47095	0
SLC35E2B	chr5:172431713-172453798	19.99	20.604	0.0436441	21.3069	20.3121	-0.068985	11.9685	11.0279	-0.118076	15.0183	10.2851	-0.546168	17.3197	15.8165	-0.130985	0.471	0
MOS	chr5:17158905-17160204	0.556015	1.02953	0.888791	0.429898	0.765819	0.833009	1.19098	1.03685	-0.199949	0.534735	0.726963	0.443058	0.6678	0.888442	0.411861	0.4712	0
CAND2	chr4:151912173-151940734	5.24586	5.7116	0.122714	5.27151	7.13586	0.436871	5.18724	5.19273	0.00152829	4.74883	4.52841	-0.0685678	5.13284	5.67341	0.144459	0.47135	0
USP39	chr4:105623920-105650275	15.4826	17.3312	0.162721	15.0711	18.4616	0.292745	14.4381	14.5459	0.0107311	13.9748	14.5555	0.0587304	14.8067	16.2841	0.137214	0.47175	0
RGD1305592	chr1:186193173-186195462	8.48809	8.00557	-0.0844352	9.93666	8.67229	-0.196347	20.5312	18.9723	-0.113924	18.51	16.3214	-0.181542	14.1009	12.6784	-0.153415	0.47205	0
GPI	chr1:86658835-86686712	371.728	335.579	-0.147594	376.22	358.853	-0.0681837	488.569	442.208	-0.14384	499.949	483.323	-0.0487922	431.738	400.507	-0.108328	0.47225	0
PWWP2B	chr1:199023640-199042277	17.8303	19.885	0.157343	19.2306	19.2556	0.00187763	12.7159	14.2095	0.160219	12.936	15.7989	0.28844	15.8765	17.3855	0.130993	0.47225	0
ST5	chr1:167119709-167284482	12.2144	12.1558	-0.00694017	13.9284	12.1811	-0.193381	15.9575	13.4918	-0.242159	15.3937	15.3953	0.000153124	14.33	13.206	-0.117842	0.4723	0
CNTNAP5B	chr13:7714566-8649647	10.6963	10.0996	-0.0828189	10.6574	10.0313	-0.0873489	10.1165	10.5248	0.0570748	9.07489	6.58868	-0.461891	10.189	9.33308	-0.126592	0.4724	0
TNS1	chr9:73231704-73444200	6.83552	7.33014	0.100789	6.25156	6.70798	0.101663	5.52805	5.99204	0.116276	4.34722	5.42862	0.320493	5.79829	6.38981	0.140145	0.4724	0
DOK3	chr17:15154413-15159609	0.84628	1.68764	0.995801	1.83121	1.63187	-0.166273	3.5733	1.61083	-1.14945	2.54112	2.20105	-0.207272	2.15083	1.77144	-0.279972	0.47245	0
ARL10	chr17:16093866-16100658	15.3692	14.0401	-0.130496	19.4228	14.2875	-0.443005	7.27406	7.64027	0.0708623	6.81937	6.81775	-0.000341416	12.5389	10.8797	-0.204765	0.47295	0
MAMSTR	chr1:96109442-96115195	0.93563	0.356718	-1.39116	0.773824	0.849019	0.133791	0.493247	0.556008	0.172796	1.36245	1.06294	-0.358147	0.893315	0.697642	-0.356682	0.47305	0
ZFP51	chr1:59370983-59383094	1.5009	1.0318	-0.540669	1.22936	1.53479	0.320136	2.67723	2.55687	-0.0663608	2.92835	1.87166	-0.645766	2.04883	1.71541	-0.256245	0.47305	0
ABCD2	chr7:129542757-129591363	13.0609	11.2688	-0.212921	10.9438	11.9435	0.126112	13.0578	11.2696	-0.212467	12.1808	11.1077	-0.13305	12.3234	11.3816	-0.114697	0.4732	0
PCED1B	chr7:136003625-136105933	2.06927	3.40626	0.719065	3.08996	2.80261	-0.140819	4.66593	3.72445	-0.325137	3.12283	5.11579	0.712104	3.20272	3.71497	0.21405	0.4733	0
INTS8	chr5:25032747-25091490	21.1557	19.7354	-0.100261	21.7026	18.4375	-0.235224	20.3792	19.873	-0.0362917	21.7738	20.4888	-0.0877616	21.3154	19.5559	-0.124296	0.47335	0
HOGA1	chr1:248779288-248806403	2.12794	3.18278	0.580833	2.24241	2.26206	0.0125917	2.55839	2.54466	-0.00776099	1.95674	2.57185	0.394356	2.22319	2.64045	0.248153	0.4734	0
IL2RG	chrX:89342054-89345715	0.373167	0.26873	-0.473666	0.134565	0.539679	2.0038	1.02557	1.20404	0.23146	0.793013	1.05304	0.409146	0.564127	0.74216	0.395711	0.4736	0
H2AFZ	chr2:235352885-235355230	99.5061	107.871	0.116455	102.871	109.958	0.0961183	126.896	138.215	0.123266	132.4	146.526	0.14625	114.888	124.33	0.113946	0.47365	0
PDZD11	chrX:88621185-88624218	10.6879	6.85465	-0.640822	9.05052	10.8418	0.260537	19.1383	15.3252	-0.320554	17.2911	16.709	-0.0494031	13.8359	12.1805	-0.183846	0.4738	0
GIPC2	chr2:250704695-250733939	0.442715	0.238936	-0.889755	2.40781	0.213408	-3.49604	1.98088	3.02002	0.608417	1.37652	1.25735	-0.130646	1.54462	1.12118	-0.462232	0.47385	0
ZFP367	chr17:6492141-6511270	2.4953	2.4758	-0.0113174	2.47595	2.50406	0.0162825	2.7949	3.9157	0.486472	2.87577	3.35714	0.223281	2.65703	3.02094	0.185186	0.47385	0
COMMD4	chr8:60915004-60918461	37.3589	35.5007	-0.0736055	40.891	32.1437	-0.347245	70.1376	66.9075	-0.0680197	68.491	64.6539	-0.0831757	53.4804	48.7207	-0.134474	0.47405	0
RT1-CE7	chr20:3410093-3413041	0.29392	1.05813	1.84803	0.848949	0.566753	-0.582957	1.39021	1.56563	0.171441	1.06036	1.55412	0.551546	0.880462	1.1615	0.399658	0.47405	0
PDLIM5	chr2:240174272-240296914	24.8864	25.0965	0.0121301	22.4945	25.9348	0.205314	17.8541	20.495	0.199013	16.2364	18.7058	0.204254	20.6053	22.6809	0.138463	0.4741	0
PIAS1	chr8:67023541-67123016	39.1997	35.1743	-0.156324	35.4177	33.9283	-0.0619818	32.1851	35.1613	0.127596	37.6733	29.9932	-0.328905	36.2886	33.5436	-0.113479	0.4741	0
NXNL2	chr17:19922402-19927149	41.8108	34.3931	-0.281758	49.4601	42.7114	-0.211644	44.5732	52.7149	0.242033	81.5941	71.2511	-0.195551	54.0574	49.4327	-0.129027	0.4743	0
RAB26	chr10:13780489-13785159	7.46248	7.44733	-0.00293311	9.29498	8.49551	-0.129751	14.4388	12.6683	-0.188728	16.8641	13.8361	-0.285514	11.839	10.4256	-0.183423	0.4744	0
TBCA	chr7:141657532-141658049	2.12126	1.52551	-0.47563	3.86319	1.0225	-1.9177	13.4417	10.0436	-0.420441	15.8944	16.2561	0.0324659	8.52128	6.83876	-0.317336	0.47485	0
LMTK3	chr1:96197901-96281094	15.3979	13.7428	-0.164055	15.4847	15.4724	-0.00114689	31.7368	30.0259	-0.0799474	31.7689	28.7016	-0.146486	23.1884	21.4838	-0.110155	0.47515	0
PDCD6	chr1:29769910-29785577	13.0403	14.0105	0.103524	15.3879	17.5412	0.188953	21.6677	21.3135	-0.0237831	20.3519	25.4797	0.324185	17.4547	19.305	0.145358	0.4752	0
MET	chr4:43134182-43211355	9.32944	8.90172	-0.067707	8.71952	8.42906	-0.0488759	9.65087	8.60045	-0.166247	8.01769	6.81176	-0.235158	8.95343	8.19526	-0.127651	0.47525	0
ACAD11	chr8:109124762-109190186	7.30761	8.31345	0.186047	7.67238	8.81331	0.20001	8.48363	9.26402	0.126956	8.76973	9.05681	0.0464702	8.04519	8.82178	0.132944	0.4753	0
SDCCAG3	chr3:4554196-4560918	21.4092	17.904	-0.257945	21.2393	18.3095	-0.214146	22.1092	22.1691	0.00390392	22.7504	22.5147	-0.0150273	21.899	20.0475	-0.127441	0.47545	0
TMEM203	chr3:3420988-3421892	12.5295	17.3333	0.468213	13.6446	13.7563	0.011767	15.8743	17.4201	0.134058	15.0843	16.7273	0.149153	14.2455	16.2293	0.188097	0.4755	0
ACAA1A	chr8:124305011-124313912	24.8143	25.351	0.0308732	23.7736	26.0456	0.131678	21.4209	25.5947	0.256827	21.5834	23.9395	0.149474	23.0336	25.1988	0.129614	0.4756	0
STK10	chr10:17379244-17481768	4.76095	5.43466	0.19094	4.2157	5.27155	0.322457	5.66914	5.82307	0.0386486	4.80428	4.82828	0.00718912	4.85168	5.32734	0.134931	0.47575	0
MMP15	chr19:10122552-10143853	11.0616	12.0759	0.126567	11.1755	11.1336	-0.00540871	9.97752	11.1821	0.16444	9.8048	11.747	0.260732	10.5642	11.513	0.124078	0.47635	0
SDCCAG1	chr6:91274860-91319272	12.8541	11.4306	-0.169324	11.6638	12.5078	0.100789	22.3484	20.9581	-0.0926676	23.1701	20.1444	-0.201883	17.2548	15.9599	-0.112547	0.4767	0
LOC688869	chr1:85669890-85677195	34.5192	39.6983	0.201678	49.4686	47.0324	-0.0728574	193.616	215.182	0.15236	193.761	225.746	0.220428	113.781	126.238	0.149891	0.4774	0
MRGPRE	chr1:204171074-204172004	9.5018	10.794	0.183956	12.1736	9.63675	-0.33714	7.08744	3.89597	-0.863282	5.7714	5.2441	-0.138227	8.77339	7.54798	-0.217043	0.4774	0
GRIFIN	chr12:14547384-14549367	6.6914	4.16628	-0.683548	5.32554	3.96984	-0.423845	24.7758	7.63523	-1.69819	9.41947	40.4028	2.10074	11.2349	13.4191	0.2563	0.47745	0
TRPC6	chr8:5472224-5577710	4.03582	3.23694	-0.318234	4.07938	4.26525	0.0642812	4.46819	3.60723	-0.3088	3.01284	2.70157	-0.157326	3.9143	3.46075	-0.177673	0.47765	0
HADH	chr2:228414103-228788636	16.091	17.9548	0.158118	15.174	21.0263	0.470594	31.0275	28.8923	-0.102865	23.6935	27.8091	0.231066	21.1996	23.5903	0.154155	0.47775	0
E130309D14RIK	chr10:61899629-61922210	7.38348	7.51111	0.0247247	7.74493	6.78106	-0.19174	9.1309	8.23941	-0.148215	9.59006	8.38913	-0.193019	8.43172	7.67758	-0.135175	0.47785	0
NRTN	chrUn:25028820-25029950	0.40165	1.51755	1.91774	1.09146	0.968067	-0.173083	2.33161	2.76588	0.246415	2.84127	3.45674	0.282874	1.61819	2.11649	0.387297	0.47795	0
FAM189B	chr2:181264169-181270006	7.55313	5.59404	-0.433184	6.60126	6.92855	0.069812	10.4323	9.1813	-0.184287	11.8765	11.5808	-0.0363785	9.0255	8.17548	-0.142704	0.47825	0
SLC13A5	chr10:59133557-59157617	1.93939	2.21672	0.192822	2.0956	1.86987	-0.164422	3.78787	2.28011	-0.732282	1.92606	2.04855	0.0889497	2.41508	2.09559	-0.204716	0.47825	0
GPM6B	chrX:48744114-48892052	199.164	220.016	0.143649	204.373	225.435	0.141504	229.806	241.189	0.0697497	214.584	230.665	0.104258	211.865	228.366	0.108205	0.4783	0
HGF	chr4:14864310-14932513	2.93702	3.21212	0.12917	2.82175	2.13254	-0.404017	3.0769	2.50286	-0.2979	2.19092	1.64097	-0.416994	2.76851	2.38599	-0.214525	0.4784	0
CD53	chr2:202186092-202234570	11.4943	9.34308	-0.298952	9.53971	10.9176	0.194638	16.6181	11.1772	-0.572191	9.89811	11.3302	0.194944	11.8265	10.63	-0.153872	0.47855	0
EVA1A	chr4:116280879-116330122	4.6763	4.93122	0.0765745	3.97393	4.18659	0.0752071	4.94936	5.62229	0.183916	4.18034	5.88995	0.494634	4.44805	5.11026	0.200224	0.47855	0
ZMAT4	chr16:72412849-72808724	17.8159	14.8177	-0.265848	15.6292	15.1125	-0.0485038	15.0397	14.9868	-0.0050902	14.1353	13.3397	-0.0835746	15.754	14.5525	-0.114453	0.47875	0
Sept9	chr10:107343671-107479964	24.1022	24.5757	0.0280683	22.9816	24.7189	0.105139	33.5535	31.9824	-0.0691836	24.832	33.4719	0.430748	26.2525	28.3747	0.11215	0.47925	0
ATP5S	chr6:91771988-91799619	3.85676	4.1149	0.0934712	3.75831	4.59072	0.288634	5.79748	6.53625	0.173036	6.16436	7.20101	0.224248	4.84482	5.52074	0.188418	0.47925	0
PCDH15	chr20:14507803-15240479	25.9818	22.5799	-0.20246	24.6078	22.7804	-0.111324	9.6018	12.6601	0.398907	16.201	13.2175	-0.293632	19.5117	18.0612	-0.111447	0.47925	0
RGD1306941	chr9:56272656-56281182	15.2015	16.7843	0.142902	13.9303	14.3341	0.0412334	13.2962	15.1638	0.189616	12.9835	14.3974	0.149127	13.9274	15.1608	0.122419	0.47925	0
CARS2	chr16:82801917-82839702	6.69957	6.56746	-0.0287322	6.78571	6.24648	-0.119455	9.38097	7.75978	-0.273721	9.96194	8.64779	-0.204095	8.14418	7.23442	-0.170892	0.47935	0
NCCRP1	chr1:83654276-83657968	1.51109	0.890309	-0.763215	1.56076	1.65557	0.0850862	2.07013	2.96906	0.520283	5.11841	3.05551	-0.744281	2.51874	2.08373	-0.273535	0.47965	0
SLC9A3R2	chr10:13890288-13900862	16.4619	16.6725	0.0183372	16.9163	18.7835	0.151057	14.8968	17.7664	0.254144	16.0524	17.6416	0.136194	16.1564	17.671	0.129279	0.47975	0
LOC100125368	chr7:9510067-9532434	6.00497	4.34209	-0.467769	6.12661	5.41615	-0.177822	6.89889	7.81561	0.179996	8.09261	6.7952	-0.25209	6.75841	6.00227	-0.171176	0.4798	0
RDH16	chr7:67752256-67766995	1.73792	1.55557	-0.159922	1.7719	1.00537	-0.817577	1.06388	1.16071	0.125664	0.978002	0.884793	-0.144497	1.4119	1.15741	-0.286737	0.4798	0
VCL	chr15:3478213-3576911	8.82291	8.92894	0.0172353	8.64241	8.66509	0.00378089	9.8525	11.0378	0.163891	9.35754	11.4931	0.296567	9.16497	9.9332	0.11613	0.4799	0
HMGB3	chrX:157027844-157033084	43.4697	41.7607	-0.0578654	42.775	39.5379	-0.113531	45.7998	43.1645	-0.0854962	51.3106	45.7099	-0.166753	45.805	42.3314	-0.113776	0.47995	0
RGD1312026	chr8:59804050-60014238	4.65687	4.62318	-0.0104746	3.84432	4.13736	0.105981	3.25093	4.89733	0.591144	3.59791	3.31483	-0.118226	3.87192	4.2415	0.131526	0.48005	0
ATP5O	chr11:31914319-31920659	148.033	172.78	0.223017	167.407	176.831	0.0790107	225.06	225.658	0.00382522	225.737	253.491	0.167289	190.062	204.74	0.107323	0.4803	0
STAT2	chr7:1564367-1581264	24.5827	23.3176	-0.0762215	22.3357	23.1435	0.0512535	29.9575	22.7851	-0.394827	22.0304	22.658	0.0405248	24.6997	22.9367	-0.106838	0.48045	0
ASAH2	chr1:236000767-236072477	3.97183	3.55527	-0.159844	1.96259	3.53767	0.850042	2.76056	2.7276	-0.0173287	1.92466	2.50672	0.381196	2.67992	3.10248	0.211231	0.4806	0
TRIM36	chr18:40329190-40356113	3.60356	3.23684	-0.15484	3.983	3.24015	-0.297797	3.31651	3.13757	-0.0800187	2.71925	2.23805	-0.280968	3.43402	2.97237	-0.208283	0.48065	0
ZFP821	chr19:39586010-39604199	6.85174	5.42637	-0.336482	6.62734	6.43005	-0.0436013	8.70713	7.22822	-0.268557	10.1344	9.04327	-0.164347	8.02604	6.9476	-0.208172	0.48065	0
CD46	chr13:110972811-111003407	0.201466	0.217585	0.111043	0.54559	0.874073	0.679939	1.08765	1.53103	0.493284	0.837303	0.98776	0.238411	0.651848	0.877646	0.429105	0.48075	0
DCLRE1A	chr1:262822170-262841965	8.49689	7.39935	-0.199538	7.59121	7.25297	-0.0657584	9.80332	9.29931	-0.0761462	9.28794	8.30516	-0.16135	8.77307	8.00017	-0.133051	0.48075	0
SEMA3D	chr4:18641724-18832339	0.865209	0.934788	0.111591	0.762907	0.698003	-0.128276	1.07805	0.615118	-0.80949	1.04807	0.918454	-0.190451	0.933766	0.791682	-0.23814	0.48075	0
ARID4B	chr17:59333395-59458111	18.1841	17.4333	-0.0608347	18.7096	17.7718	-0.0741878	20.0941	19.0873	-0.0741544	20.0731	17.5865	-0.190797	19.2635	17.9034	-0.105635	0.48105	0
DAB2	chr2:55684228-55737464	1.15873	0.59415	-0.963648	0.899376	0.877596	-0.0353677	3.01095	1.94841	-0.627925	1.83727	2.52808	0.460479	1.68889	1.43783	-0.232178	0.4811	0
MORC4	chrX:127559248-127607769	0.917813	1.13671	0.308597	0.943175	1.20866	0.357817	1.19122	1.52061	0.352202	1.22752	1.21423	-0.0157046	1.06457	1.2609	0.244188	0.4811	0
LHFPL2	chr2:24407386-24489407	17.8921	18.3286	0.0347688	15.8545	17.5092	0.143217	16.5108	16.0514	-0.0407065	12.0157	15.814	0.396285	15.673	16.9465	0.11271	0.48115	0
RASSF6	chr14:18956710-18987702	0.974626	0.60954	-0.677127	0.61019	0.494569	-0.303086	1.13362	0.91854	-0.303521	0.746038	0.71471	-0.0618899	0.863658	0.674813	-0.355972	0.4812	0
RPS27L	chr8:71258144-71262772	1.32871	2.14659	0.692025	2.93519	0.640449	-2.1963	13.9095	21.681	0.640357	11.1026	13.7546	0.30901	7.03283	9.03884	0.362031	0.4812	0
UBQLN4	chr2:180669524-180684724	23.1288	21.5452	-0.102325	24.4866	23.9418	-0.0324614	26.0744	23.5457	-0.147171	23.979	21.7714	-0.139334	24.4343	22.6448	-0.109726	0.4813	0
TCEANC2	chr5:128230041-128269948	3.34268	2.76558	-0.273426	3.38636	3.15424	-0.102444	5.06072	3.72863	-0.440695	5.35244	5.12103	-0.0637638	4.24379	3.63915	-0.221754	0.48135	0
SORL1	chr8:44958577-45101843	19.0024	18.4894	-0.0394855	14.6004	19.2279	0.397194	28.8967	31.3516	0.117636	24.4893	24.5408	0.00303326	21.5138	23.0681	0.100637	0.48145	0
DBH	chr3:6052705-6069826	0.66184	0.6703	0.018325	0.983774	0.558348	-0.817162	1.32028	1.06801	-0.305929	1.24591	1.15878	-0.104593	1.04176	0.846917	-0.298738	0.48155	0
GPKOW	chrX:26832381-26846629	25.3717	23.9939	-0.0805501	26.443	24.5044	-0.10985	24.3855	22.1486	-0.138809	24.5604	23.5363	-0.061443	25.2897	23.5317	-0.103946	0.48175	0
TGFB1I1	chr1:187504714-187511510	7.08543	6.71691	-0.0770558	6.98385	7.43553	0.0904118	10.8676	10.298	-0.0776792	11.1128	7.96003	-0.481379	8.92179	8.01918	-0.153877	0.48215	0
ALDH5A1	chr17:47193745-47220081	35.2859	36.8691	0.0633207	34.1084	38.7455	0.183904	35.6666	37.089	0.0564169	32.2647	35.0517	0.119526	34.4282	36.8992	0.0999987	0.48225	0
GSG1L	chr1:184939403-185161971	7.79114	8.75121	0.167646	8.61995	8.58498	-0.00586478	4.91556	6.41941	0.385086	5.24748	5.85473	0.15798	6.74786	7.46144	0.145023	0.4824	0
KATNAL1	chr12:6604615-6657794	11.8746	9.58788	-0.308592	10.1852	9.42501	-0.111909	9.73465	9.11241	-0.0952958	7.86101	7.53218	-0.0616473	9.99932	8.92852	-0.16341	0.4824	0
SSFA2	chr3:62438269-62475544	16.6128	18.0388	0.118807	15.4087	17.205	0.159089	15.5092	16.1661	0.0598462	13.9138	15.0426	0.112541	15.4329	16.6353	0.108241	0.4824	0
ADAMTS7	chr8:95068561-95108281	0.70188	0.727765	0.0522496	1.00913	0.632921	-0.673016	0.863243	0.858322	-0.00824747	0.937842	0.787229	-0.252561	0.878571	0.745578	-0.236801	0.4827	0
HCN2	chr7:11484695-11503614	75.3818	68.7148	-0.133595	70.5837	71.0224	0.00893982	67.6161	63.8416	-0.0828696	72.4962	63.3813	-0.193848	71.7888	66.7657	-0.104651	0.4827	0
SLITRK5	chr15:96403813-96412374	8.73479	7.63245	-0.194626	8.16216	7.65949	-0.0917025	6.32264	5.78744	-0.127601	5.45317	5.28781	-0.0444248	7.25709	6.63953	-0.128309	0.48285	0
LIG1	chr1:73728891-73767428	15.8918	15.0587	-0.0776829	18.6437	13.9811	-0.41521	19.4931	19.0515	-0.0330605	20.7484	21.6443	0.0609892	18.6563	17.2187	-0.115688	0.48325	0
HNRNPR	chr5:155053480-155091865	14.8926	13.2513	-0.168459	17.7632	14.8181	-0.261532	13.3087	11.9207	-0.1589	14.7916	16.0571	0.118432	15.2892	13.9787	-0.129289	0.4835	0
RGS9	chr10:98598325-98652880	77.8038	72.8415	-0.0950791	79.6817	65.9929	-0.271939	41.695	59.2806	0.507685	67.189	51.892	-0.372714	67.4923	62.7784	-0.104453	0.48375	0
DBP	chr1:96173572-96186431	143.212	135.265	-0.0823683	147.622	144.631	-0.0295242	236.426	218.324	-0.114917	259.76	235.528	-0.141278	194.339	180.361	-0.107694	0.48395	0
SIRT1	chr20:25666604-25688743	11.9053	11.0209	-0.111367	12.5057	11.7238	-0.0931445	13.7838	13.7626	-0.0022248	15.4266	13.0968	-0.236202	13.3714	12.3078	-0.119575	0.48405	0
ELMO3	chr19:35119812-35124187	0.767837	1.07836	0.489966	1.53545	1.29554	-0.245107	2.34754	2.49682	0.0889441	2.28372	3.38121	0.566154	1.70346	2.00507	0.235183	0.48415	0
TRPM7	chr3:114320797-114410524	18.5527	17.4391	-0.0893059	18.0531	16.1638	-0.15948	22.3189	22.7537	0.0278377	24.196	21.6581	-0.15986	20.6929	19.2953	-0.100885	0.48415	0
CLVS1	chr5:23135748-23557840	8.76321	6.33103	-0.469019	7.17785	6.61441	-0.11794	7.15401	6.69133	-0.0964583	6.94018	5.75934	-0.269069	7.55454	6.34035	-0.25278	0.4842	0
PTGES	chr3:9946193-9957538	2.15901	1.25566	-0.781925	1.88783	0.960728	-0.974526	1.97749	1.65489	-0.256937	1.46437	2.33889	0.67554	1.88454	1.52268	-0.307597	0.4842	0
SMC2	chr5:69561141-69607372	7.71901	6.70734	-0.202675	7.57461	6.84063	-0.147043	7.41528	7.20816	-0.0408697	8.00528	7.64177	-0.0670456	7.69635	7.06276	-0.123943	0.4842	0
GLRA1	chr10:40922866-41021767	12.063	11.695	-0.0447034	12.1342	10.8637	-0.159558	7.59348	7.56059	-0.00626204	6.5295	4.46324	-0.54888	9.74395	8.78435	-0.149571	0.4844	0
PLS3	chrX:29868936-29965118	31.1837	33.2161	0.0910891	28.6753	30.9394	0.109636	31.5735	29.7224	-0.0871618	25.6376	32.71	0.35147	29.3658	31.602	0.105879	0.4844	0
UPRT	chrX:92510900-92535135	18.5582	18.0495	-0.040098	17.3643	16.3936	-0.0829904	8.73515	6.80492	-0.360254	8.82128	6.0208	-0.551032	13.6647	12.118	-0.173307	0.48455	0
IKZF4	chr7:1925369-1949435	4.26535	4.14699	-0.0405988	4.8272	4.25495	-0.182044	6.1084	5.36384	-0.187529	4.95207	4.11186	-0.26824	5.01906	4.44182	-0.176268	0.4847	0
METTL14	chr2:220100818-220117011	17.1552	14.5837	-0.234286	18.97	17.7622	-0.0949129	16.9104	17.3444	0.0365618	18.5348	16.4191	-0.174861	17.9457	16.461	-0.124584	0.4847	0
PDE3B	chr1:172409046-172577852	14.7677	13.6059	-0.118219	15.0865	13.6457	-0.144812	12.2648	10.6681	-0.20122	9.81292	10.2228	0.0590337	13.1191	12.1028	-0.116332	0.4849	0
NACAD	chr14:87354751-87363699	29.0079	27.0986	-0.0982249	28.2817	26.0133	-0.120621	26.6734	25.1671	-0.0838651	27.4094	25.922	-0.080496	27.9573	26.0205	-0.103576	0.485	0
D17WSU104E	chrUn:25611759-25619054	37.632	36.0419	-0.0622849	43.2612	34.8713	-0.311031	34.5721	26.9654	-0.358499	30.277	35.4183	0.226269	36.7343	33.3783	-0.138215	0.48515	0
CD14	chr18:29374594-29376190	0.530016	0.572512	0.11127	0.430091	0.511009	0.248707	1.31756	1.89445	0.523909	0.955104	1.22111	0.354458	0.790806	1.0164	0.362068	0.48525	0
MARK2	chr1:209958901-210022099	22.1283	19.9926	-0.146429	23.1804	20.1248	-0.203936	19.5361	20.1462	0.0443664	21.7375	20.3208	-0.0972292	21.7575	20.0924	-0.114861	0.4853	0
NDUFA1	chrX:7726393-7730117	155.683	179.819	0.20794	172.344	180.283	0.0649722	138.749	147.997	0.0930817	136.986	155.508	0.182956	152.018	166.362	0.130082	0.48535	0
ZBTB7B	chr2:181574670-181590120	29.5795	31.3836	0.0854111	28.1916	34.2772	0.281982	27.192	28.4578	0.0656433	29.6362	30.9575	0.0629304	28.7381	31.285	0.122502	0.4854	0
IGIP	chr18:28933969-28936782	9.98847	10.1426	0.0220987	9.23161	11.1958	0.278299	20.9013	21.6878	0.053291	22.2837	25.3773	0.187551	15.3008	16.6708	0.123715	0.48545	0
PROX1	chr13:106417772-106471389	50.0572	45.7983	-0.128283	47.7665	44.8417	-0.0911572	40.8669	40.6421	-0.00795706	38.0637	34.3553	-0.147885	44.5597	41.5459	-0.101033	0.48565	0
RAP2B	chr2:150826482-150827034	5.98483	6.15062	0.0394219	10.8737	6.31926	-0.783022	5.49244	5.16893	-0.0875819	4.06902	4.12066	0.018193	6.71525	5.47427	-0.294775	0.48565	0
TRHR	chr7:80050670-80095991	8.75315	8.97099	0.0354662	8.82902	9.76521	0.145399	9.49872	9.17175	-0.0505352	7.00316	9.60396	0.455624	8.55139	9.35385	0.129401	0.48565	0
KCNJ13	chr9:86143281-86273719	1.15904	0.268258	-2.11123	0.806619	0.478914	-0.752121	0.957707	2.34821	1.2939	0.486721	5.48365	3.49397	0.861463	2.03336	1.23901	0.48585	0
TOMM22	chr7:117913210-117914960	52.6471	56.3934	0.0991728	55.4129	57.8024	0.0609089	78.8604	87.1655	0.144457	82.0256	91.666	0.160312	66.6466	72.1041	0.113551	0.48585	0
ZFP414	chr7:16131603-16134226	18.4807	17.2569	-0.098851	18.0352	16.4367	-0.133902	33.8926	31.4626	-0.107334	38.9838	34.6392	-0.170471	26.9061	24.4018	-0.140948	0.48605	0
ZFP612	chr19:39961601-39975049	20.4018	19.3521	-0.0762117	20.6732	18.9332	-0.126844	26.7109	25.7838	-0.0509615	26.0817	23.8855	-0.126906	23.3541	21.7639	-0.101734	0.48605	0
LOC498675	chr16_random:1118480-1122701	1.34373	0.967441	-0.473994	0.970761	1.72736	0.831378	2.02975	3.72401	0.875556	3.14429	3.02311	-0.0567035	1.83863	2.29213	0.318059	0.4861	0
CCDC112	chr18:40455512-40489699	5.84377	5.04133	-0.213095	6.63561	5.26946	-0.332576	6.56142	6.93812	0.0805351	7.19685	6.40979	-0.167089	6.55702	5.85407	-0.163602	0.48615	0
CNOT6L	chr14:14924399-15016293	14.8741	14.1963	-0.0672828	12.986	11.7634	-0.142652	14.4892	15.4625	0.0937971	16.4732	12.844	-0.359024	14.703	13.5019	-0.122946	0.4862	0
BASP1	chr2:76876844-76927721	238.771	222.653	-0.100834	229.723	223.551	-0.0392887	277.794	254.116	-0.128525	305.128	276.314	-0.143106	261.916	242.308	-0.112261	0.48625	0
WBSCR17	chr12:26293378-26821707	40.9315	38.1205	-0.102647	35.4983	35.3972	-0.00411375	34.1423	29.5839	-0.206746	30.1236	25.1475	-0.26048	35.43	32.2724	-0.13467	0.48625	0
PASK	chr9:92582176-92623004	3.08257	2.43539	-0.339983	3.53796	2.56342	-0.464846	3.20185	3.38357	0.0796407	3.07452	3.32238	0.111853	3.23592	2.89316	-0.161527	0.48635	0
ZRSR2	chrX:51304125-51327857	3.89213	4.97412	0.35388	5.62265	3.78153	-0.572283	9.93389	8.91038	-0.156872	10.7119	9.12036	-0.232055	7.39859	6.54251	-0.177407	0.48635	0
MBOAT2	chr6:42486111-42608004	21.3426	22.8158	0.0962987	22.0288	22.7338	0.0454502	22.0905	23.7088	0.101995	18.9956	22.6886	0.256302	21.1897	22.9187	0.113159	0.48645	0
ACAT1	chr8:57044053-57073038	29.4514	28.1629	-0.0645415	29.248	31.5735	0.110378	24.9331	29.519	0.243581	28.7095	33.0854	0.204666	28.2321	30.4646	0.109794	0.48665	0
USP53	chr2:219620237-219681958	8.52221	7.74465	-0.138027	8.84094	8.30529	-0.0901696	10.3185	8.68762	-0.248199	7.64679	7.75593	0.0204469	8.83858	8.09676	-0.12647	0.48675	0
NLE1	chr10:71109015-71125696	8.31801	10.8674	0.385699	9.05743	9.97052	0.138566	7.39636	8.24996	0.157572	7.28737	6.81244	-0.0972263	8.07094	9.0418	0.163873	0.48695	0
TOX3	chr19:17866114-17975738	13.2497	15.2788	0.205574	12.5455	14.0304	0.161388	15.3845	14.6986	-0.0658072	15.243	17.4137	0.192072	14.071	15.2792	0.11885	0.4871	0
SGK196	chr16:70462988-70473362	25.796	28.8973	0.163788	24.989	27.5064	0.138477	25.9785	26.8846	0.0494627	25.1866	26.773	0.0881203	25.542	27.4932	0.106201	0.4874	0
ALDH6A1	chr6:108473029-108516414	16.2869	17.0724	0.0679547	16.6381	18.6621	0.165614	19.4854	18.7965	-0.0519315	16.264	20.8998	0.361805	17.1621	18.751	0.127741	0.48775	0
SPDYA	chr6:24005833-24060920	0.666434	0.775295	0.218284	0.77612	0.691965	-0.16558	1.16833	1.55658	0.413926	1.53503	2.15265	0.487845	1.02159	1.25749	0.299729	0.4881	0
ORC3	chr5:51152705-51226698	20.1387	16.2721	-0.307574	17.1891	15.4011	-0.158455	17.9436	17.6499	-0.0238061	17.0315	14.1894	-0.263387	18.1541	15.8378	-0.196927	0.4886	0
HAUS5	chr1:85706543-85717494	5.87696	6.9631	0.244661	7.94314	5.43777	-0.546693	10.0343	8.28142	-0.27699	10.8104	10.6243	-0.0250543	8.5856	7.71288	-0.15465	0.48865	0
CDO1	chr18:40914027-40928671	8.95911	7.74186	-0.210676	9.99256	10.299	0.0435711	10.6202	10.319	-0.0415163	14.471	11.0988	-0.382761	10.956	9.78624	-0.162888	0.4887	0
PRR5L	chr3:86868128-86948468	4.16377	5.31993	0.353518	3.85179	4.59351	0.254066	4.61437	3.91812	-0.235973	3.41364	4.33353	0.344231	4.01818	4.55682	0.181487	0.4888	0
PRPSAP1	chr10:106582380-106604072	36.0591	41.805	0.213312	38.2574	42.7934	0.16165	57.0162	52.0113	-0.132547	48.2603	57.2822	0.24725	44.543	47.9841	0.107358	0.48895	0
PTCHD2	chr5:165315545-165366775	13.6514	15.6987	0.201603	14.9794	14.1483	-0.0823465	15.5714	13.7852	-0.175775	14.905	10.8039	-0.464244	14.7824	13.6574	-0.114202	0.489	0
ZSWIM8	chr15:3788238-3814937	33.8422	31.6621	-0.0960654	36.1453	32.3341	-0.160752	37.8716	37.8705	-4.34e-05	39.2374	35.391	-0.148846	36.7597	34.0903	-0.108763	0.4893	0
MOSPD1	chrX:140301919-140329537	1.7415	3.16616	0.8624	2.20413	2.04764	-0.106247	3.12244	3.35466	0.103494	2.95886	3.00601	0.0228092	2.48132	2.871	0.210446	0.48955	0
OGFOD2	chr12:33606537-33609847	4.82262	4.56631	-0.0787885	4.70145	4.01825	-0.226536	6.26662	5.40134	-0.214372	6.08268	5.18509	-0.230339	5.44086	4.75181	-0.195357	0.4896	0
PPP2R5A	chr13:107413760-107458595	22.5631	27.9177	0.307211	27.0814	29.0952	0.103479	27.9881	28.6418	0.0333118	26.9246	27.2721	0.0184993	26.1182	28.1784	0.109536	0.4896	0
HIST1H2AD	chr17:48448925-48449332	1.28721	3.4663	1.42915	0.71037	1.2409	0.804743	2.05639	3.06167	0.574206	2.42325	1.4988	-0.693134	1.58931	2.31654	0.543573	0.4897	0
SLC18A2	chr1:265789868-265825370	3.69085	3.75412	0.0245243	3.35059	3.72636	0.15335	6.47172	7.80242	0.269771	6.71113	7.44496	0.149709	4.98155	5.5509	0.156127	0.48985	0
RGD1304694	chr7:122969367-123005584	30.4743	35.5465	0.222114	34.7681	35.6781	0.0372763	21.554	23.9598	0.152658	20.6993	20.9541	0.0176547	27.2577	29.3615	0.107266	0.4899	0
ST8SIA3	chr18:60455515-60478486	31.6851	29.545	-0.100895	29.2651	27.3284	-0.0987775	29.5333	27.3113	-0.112842	26.6314	21.6029	-0.301904	29.4136	26.5053	-0.150198	0.48995	0
GABRR2	chr5:49349962-49387218	71.7613	74.0685	0.0456526	81.3656	75.7726	-0.102743	100.156	85.253	-0.232432	86.5482	82.3675	-0.0714295	84.6407	78.903	-0.101271	0.4902	0
ERCC4	chr10:894235-1230622	0.895266	1.20013	0.4228	1.00281	0.959088	-0.0643099	0.966177	0.958734	-0.011157	0.753008	1.12434	0.578344	0.908429	1.05963	0.222113	0.4903	0
ABCB6	chr9:74454804-74463083	28.2209	27.9736	-0.0127008	30.0155	28.4083	-0.0793909	32.5835	28.7773	-0.179213	33.1722	30.3767	-0.127009	30.9633	28.7729	-0.105851	0.4906	0
INTS7	chr13:107641145-107696311	17.3797	16.049	-0.114926	16.7414	16.4391	-0.0262948	14.0245	13.7212	-0.0315456	17.2592	14.4046	-0.26084	16.4379	15.1827	-0.114593	0.4908	0
SLC9A5	chr19:35164589-35184677	2.34988	2.76753	0.236015	2.56141	2.12277	-0.27099	3.7672	3.06187	-0.29908	3.52201	2.89759	-0.281546	3.02272	2.69075	-0.167836	0.4908	0
ADCY7	chr19:20051638-20073861	3.7116	4.03281	0.119742	3.71342	4.33088	0.22191	3.05843	3.36691	0.138632	2.09416	2.3723	0.179914	3.18225	3.55612	0.160259	0.491	0
P2RX2	chr12:46485124-46488319	7.86109	6.11418	-0.36257	7.4245	7.37712	-0.00923611	11.7565	10.154	-0.211413	9.85726	9.68962	-0.0247468	9.15329	8.21562	-0.155921	0.4912	0
BTBD9	chr20_random:185812-189710	30.8711	27.7248	-0.155079	27.7772	26.2037	-0.0841302	21.5096	17.6806	-0.282814	16.1459	15.9438	-0.0181686	24.4249	22.1445	-0.141405	0.49125	0
CLK3	chr8:61519188-61534201	20.7597	20.2818	-0.0336007	25.1706	22.3372	-0.17229	31.9896	28.3522	-0.174142	34.1186	32.6447	-0.0637075	27.7871	25.5626	-0.120385	0.49125	0
EIF2B1	chr12:33138341-33146597	8.0047	10.918	0.447785	9.76222	11.2494	0.204572	12.5045	12.7819	0.0316613	11.9543	12.0242	0.00840567	10.4827	11.6746	0.155358	0.49125	0
CDC14B	chr17:6371203-6454460	2.1688	2.96792	0.452553	2.06233	2.7602	0.4205	2.84597	2.68637	-0.0832605	2.33161	2.2879	-0.0273022	2.34336	2.68078	0.194069	0.4916	0
FBXO18	chr17:77945024-77982314	36.7328	36.9113	0.00699202	39.1226	34.7341	-0.171653	34.6635	31.3954	-0.142865	34.0376	32.1465	-0.0824712	36.3223	33.8421	-0.102037	0.4916	0
BAZ2A	chr7:1389068-1423112	29.6799	27.1625	-0.127867	29.1574	27.9162	-0.0627617	26.9782	28.8531	0.0969288	32.2027	26.6551	-0.272769	29.5811	27.5721	-0.101465	0.49185	0
SLC25A4	chr16:49353475-49357271	521.427	547.52	0.0704459	538.953	597.372	0.148469	593.609	627.112	0.0792115	579.978	638.656	0.139042	558.153	599.322	0.102671	0.49185	0
FZD1	chr4:25994422-25998821	10.3032	11.411	0.147336	10.8076	12.1201	0.165355	14.1666	12.1752	-0.218548	9.20675	12.5412	0.445913	11.1044	12.0141	0.113605	0.4919	0
TMEM179B	chr1:211443283-211445283	4.69058	6.35606	0.438366	6.48296	7.2917	0.169603	11.5981	10.3938	-0.158162	8.45958	12.5836	0.572886	7.69094	8.99161	0.225419	0.4919	0
ZBTB1	chr6:98981037-98990516	15.3831	13.8544	-0.151005	13.8936	13.6253	-0.0281303	11.9036	10.146	-0.230484	11.0734	9.84705	-0.169334	13.1844	11.9532	-0.141433	0.492	0
OAF	chr8:46224198-46242911	18.6232	19.9688	0.100641	20.1429	24.476	0.281095	23.0283	21.6955	-0.0860128	21.2138	24.5727	0.212054	20.7176	22.5903	0.12485	0.49205	0
ARHGAP27	chr10:92522545-92551340	4.69728	3.25685	-0.528348	3.59924	3.41356	-0.0764136	3.36667	2.77879	-0.276867	2.27103	2.95593	0.380268	3.52888	3.10782	-0.183305	0.49225	0
TSHZ3	chr1:89163877-89236299	7.17908	6.1012	-0.234707	6.15748	5.85688	-0.0722075	5.16269	4.62577	-0.158429	4.81992	4.84323	0.00696046	5.89202	5.38204	-0.13061	0.49255	0
ZFP36	chr1:83486642-83489123	3.02968	2.35411	-0.363981	3.21903	3.12603	-0.0422925	7.48176	7.89664	0.0778602	6.04121	9.53577	0.65851	4.84785	5.53316	0.190759	0.4928	0
DNAJB13	chr1:157931498-157945870	1.15647	0.535432	-1.11096	0.803692	0.876083	0.124425	1.00308	1.09875	0.131421	1.31517	1.06065	-0.310299	1.06815	0.878736	-0.281607	0.4929	0
SIX5	chr1:78451900-78455873	1.08635	1.44746	0.414031	1.83954	1.60602	-0.195854	2.64472	2.13035	-0.312019	1.59418	3.30594	1.05224	1.7736	2.08153	0.23096	0.4929	0
TMEM51	chr5:160938671-160988578	6.17891	5.47043	-0.175697	5.52546	5.86779	0.0867233	5.27389	4.45957	-0.241964	5.85935	4.39854	-0.413716	5.73314	5.07383	-0.176248	0.49295	0
AGBL3	chr4:62165890-62243108	1.7155	1.28103	-0.421333	1.82624	1.55672	-0.230367	1.95805	1.61174	-0.280796	1.9948	2.09897	0.0734358	1.87217	1.61974	-0.208944	0.49305	0
SDK1	chr12:12802563-13774644	7.28257	8.14099	0.160756	6.46855	6.58589	0.0259356	9.87921	9.47752	-0.059886	7.83074	9.95207	0.345847	7.82442	8.45024	0.11101	0.4932	0
CREBRF	chr10:16665423-16723929	22.2688	21.5642	-0.0463893	20.1206	20.3103	0.0135371	22.8319	20.8737	-0.129367	21.7218	18.3855	-0.240572	21.7571	20.2755	-0.101747	0.4935	0
ZRANB1	chr1:192421954-192462310	34.6677	31.1152	-0.155975	33.6683	30.5134	-0.141948	26.9161	27.1633	0.0131861	30.0777	27.9795	-0.104326	31.5759	29.2221	-0.111766	0.4935	0
PIGK	chr2_random:3394117-3403080	35.52	36.9766	0.0579841	35.753	38.0425	0.0895472	56.3889	54.7701	-0.0420224	49.5427	63.4048	0.355921	43.8983	47.5322	0.114739	0.49375	0
RBM42	chr1:85692753-85702684	38.673	43.4028	0.166459	46.5447	46.8102	0.00820683	59.4523	65.4907	0.139558	61.7615	68.1671	0.142367	51.2121	55.1727	0.10747	0.4939	0
AGRN	chr5:172999420-173032125	19.566	19.8407	0.0201155	22.2884	20.1833	-0.143133	31.3677	28.9531	-0.11556	28.7485	26.6638	-0.108607	25.2841	23.616	-0.0984681	0.4941	0
PEX7	chr1:15099264-15163734	6.83927	7.4652	0.126339	7.08963	8.67632	0.291371	8.02561	9.26533	0.207231	9.06601	9.70136	0.0977192	7.73029	8.7116	0.172414	0.4943	0
CFH	chr13:53252248-53355987	38.4613	33.2831	-0.208616	32.4987	34.5362	0.0877279	56.898	47.6475	-0.255979	38.2043	40.2806	0.0763496	41.2397	38.5351	-0.0978622	0.49455	0
CASP3	chr16:48944225-48962420	14.5166	15.8847	0.129933	16.0548	17.2788	0.105999	22.8621	25.6346	0.165138	21.849	23.3403	0.0952557	18.6598	20.2435	0.117522	0.4947	0
QTRT1	chr8:20515241-20522519	3.10819	2.76971	-0.16634	4.28931	3.74546	-0.195602	4.45166	4.2991	-0.050307	3.92661	2.66833	-0.557346	3.93668	3.3536	-0.231272	0.4947	0
IFITM3	chr1:201198658-201199814	7.96949	10.9879	0.463351	12.0922	15.832	0.388771	55.698	35.6429	-0.644012	29.1561	56.7257	0.960203	25.3093	28.736	0.183193	0.49495	0
ADCK2	chr4:67081184-67094070	16.8944	17.9743	0.0893911	17.4286	19.1507	0.13594	12.3095	13.4791	0.130958	13.9156	15.6097	0.16574	15.2908	16.6342	0.121488	0.495	0
ZFP830	chr10:70983766-70985231	9.92632	9.83475	-0.0133711	11.037	9.76837	-0.176156	11.3491	9.40701	-0.270763	12.2913	11.0801	-0.149671	11.1397	9.98593	-0.157744	0.4951	0
ATL2	chr6:2728723-2771112	29.8942	29.0215	-0.0427446	31.4743	27.6144	-0.188754	21.1901	21.4311	0.0163167	24.1399	21.4509	-0.170383	26.9703	25.0301	-0.107709	0.49515	0
CCDC13	chr8:127094152-127141746	2.42783	2.28276	-0.088888	3.45125	2.73092	-0.337732	1.49486	1.68545	0.173122	2.43233	1.71102	-0.507484	2.48576	2.12125	-0.228771	0.49535	0
CNGB3	chr5:33867638-34137694	4.94376	3.17322	-0.639664	4.87077	4.12166	-0.240923	5.96725	5.76898	-0.04875	5.3194	6.21856	0.225318	5.26561	4.73681	-0.152685	0.49535	0
RASL11A	chr12:8705992-8710040	2.70884	4.06237	0.584645	3.26595	3.48216	0.0924796	4.46738	5.91901	0.405925	4.01322	4.09474	0.0290119	3.58507	4.342	0.276357	0.4955	0
PAQR8	chr9:19631089-19680897	12.128	15.8669	0.387677	11.5853	16.4335	0.504346	11.9428	9.91015	-0.269163	9.14163	8.50695	-0.10381	11.258	12.8575	0.191651	0.4957	0
FABP12	chr2:93494780-93510205	6.29355	6.244	-0.0114057	10.3429	13.9391	0.430496	10.0101	15.0085	0.584323	23.7941	23.0385	-0.0465609	12.4186	14.2435	0.197802	0.49575	0
FZD5	chr9:63386989-63388747	40.122	48.7514	0.281049	47.739	46.8022	-0.0285929	23.6759	25.9613	0.132946	17.1481	18.2825	0.0924181	32.894	35.6415	0.115734	0.4962	0
SNTB1	chr7:92156714-92426444	12.3097	13.6558	0.149712	13.3051	13.7107	0.0433184	8.07461	8.44302	0.0643664	7.00773	9.08656	0.374788	10.3449	11.346	0.133258	0.4962	0
A330021E22RIK	chr4:25065227-25136401	7.26243	5.39418	-0.429048	7.14241	7.08416	-0.0118129	7.36803	8.22119	0.158069	9.15255	7.73582	-0.24262	7.72338	7.0364	-0.134394	0.49625	0
ITSN1	chr11:31721358-31909719	44.7627	40.6986	-0.137318	42.0207	40.9674	-0.0366237	36.1425	33.0504	-0.129026	28.9484	27.0757	-0.0964857	38.3564	35.6861	-0.104104	0.4965	0
RCOR2	chr1:209951233-209957328	3.67455	3.65213	-0.00882934	4.84546	3.0114	-0.6862	4.67612	4.61052	-0.0203815	4.18561	4.35696	0.0578849	4.34833	3.8645	-0.170179	0.49655	0
DCBLD1	chr20:30945728-31039357	4.92167	5.31709	0.111488	4.88775	5.83536	0.255652	4.65586	4.36265	-0.0938425	2.93317	4.00239	0.448398	4.38806	4.90888	0.161809	0.4967	0
TENM1	chrX:1785736-2560524	3.00455	2.72266	-0.142133	2.50301	2.37454	-0.0760139	3.71155	3.73019	0.00722631	3.37436	2.55356	-0.402103	3.13334	2.82065	-0.151672	0.49675	0
USP36	chr10:108264873-108296384	12.167	11.4261	-0.0906512	11.806	11.9316	0.0152668	12.1468	11.1816	-0.119456	12.981	10.9915	-0.240015	12.2901	11.3725	-0.111945	0.4973	0
CDHR2	chr17:15938003-15962808	5.39531	5.68455	0.0753401	5.90097	4.98697	-0.242788	6.57222	5.26551	-0.319807	5.8801	5.74881	-0.0325794	5.93268	5.40459	-0.134501	0.4974	0
MOB2	chr1:202138581-202195532	23.9575	24.0047	0.00283981	24.1364	29.8665	0.307316	23.7603	24.7879	0.0610809	27.3664	30.1161	0.138126	24.8279	27.1057	0.126633	0.4974	0
RPS10	chr20:5849317-5853894	58.292	77.5513	0.411852	100.29	98.8602	-0.0207131	175.997	195.153	0.149057	182.737	193.352	0.0814603	126.744	137.651	0.1191	0.4974	0
ZBED3	chr2:25692720-25703663	13.5094	16.1447	0.257098	16.1631	15.3839	-0.0712843	14.0555	14.5621	0.0510866	12.5445	16.04	0.354621	14.1387	15.5113	0.133671	0.4974	0
ZFP398	chr4:75975745-76002315	9.09413	7.88757	-0.205356	7.98811	7.2617	-0.137546	6.67084	7.82653	0.230505	7.61692	5.78112	-0.397857	7.90427	7.19557	-0.135522	0.49755	0
ZFP385D	chr15:6526421-6935331	24.8743	23.7301	-0.0679376	24.9083	23.5512	-0.0808234	17.9501	13.3299	-0.429323	14.0689	14.2868	0.0221698	20.7439	18.9775	-0.128391	0.49765	0
SCARB1	chr12:32390182-32457663	70.318	61.3187	-0.197567	81.2937	70.9444	-0.196456	70.0073	77.2397	0.141838	91.6255	85.7806	-0.0950974	78.3841	73.1672	-0.0993641	0.49775	0
NEMF	chr1:82118864-82122483	5.75677	5.26055	-0.130046	5.17865	4.96359	-0.0611911	6.45424	6.04032	-0.0956244	7.13903	6.13042	-0.219741	6.11103	5.55641	-0.137264	0.4978	0
KLHDC1	chr6:91193504-91248011	5.72121	6.20578	0.117292	6.68645	8.20184	0.294708	4.60991	5.05276	0.132331	5.10892	6.03754	0.240943	5.58279	6.40652	0.198556	0.49785	0
VASH1	chr6:110805016-110821612	14.6666	13.6623	-0.102336	14.8765	14.5791	-0.0291344	11.227	10.5557	-0.0889461	11.2702	9.61808	-0.228687	13.1411	12.195	-0.107796	0.49845	0
TSPAN33	chr4:56584839-56608349	5.35761	6.66615	0.315264	8.22406	7.65604	-0.103252	6.25401	7.75974	0.311226	6.15122	7.19657	0.226436	6.52491	7.29075	0.16011	0.49865	0
KDM4B	chrUn:25369755-25447529	42.2897	39.8324	-0.0863628	44.4563	39.1307	-0.184085	31.4809	31.7023	0.0101125	35.5899	34.0337	-0.0645063	38.8312	36.2901	-0.097639	0.49875	0
PYROXD2	chr1:248136868-248162250	4.91642	4.3738	-0.168719	5.26395	4.36837	-0.26905	6.46725	5.90066	-0.132275	7.39478	6.80153	-0.120647	5.97387	5.28875	-0.175739	0.49925	0
AEN	chr1:134615997-134625365	7.94692	10.1423	0.351914	9.97978	9.38974	-0.0879235	10.1749	11.3822	0.161761	9.43374	10.4109	0.142188	9.37795	10.2732	0.131542	0.49935	0
COASY	chr10:90099565-90103477	14.014	14.2391	0.0229909	14.5321	14.0445	-0.0492468	18.616	15.2763	-0.285249	18.6035	16.8519	-0.142662	16.3563	15.0097	-0.12395	0.49935	0
MAF	chr19:45857727-45861454	7.53794	8.01479	0.0884946	8.0409	9.04695	0.170075	10.0859	11.052	0.131956	8.72653	10.7236	0.297307	8.56872	9.61289	0.16589	0.49955	0
FUT4	chr8:11541523-11545485	1.71251	1.56185	-0.132858	1.36953	2.03711	0.572837	1.60406	1.72167	0.102078	1.16158	1.39878	0.268075	1.46944	1.68219	0.195079	0.4997	0
GPX2	chr6:99372417-99376262	2.09337	1.18987	-0.815019	1.19387	1.2747	0.0945026	1.85072	1.58362	-0.224862	1.91281	1.65404	-0.209704	1.7614	1.41035	-0.320668	0.4997	0
FXYD5	chr1:86076281-86085675	7.95847	8.60032	0.111898	7.82778	8.69123	0.150957	23.2992	23.8884	0.0360333	16.015	21.9633	0.45567	13.458	15.3155	0.186535	0.49975	0
SLC35C1	chr3:76847878-76854414	8.45325	9.77568	0.209691	8.45918	9.75731	0.205967	11.2351	9.86117	-0.188189	8.82114	10.977	0.315453	9.21437	10.0494	0.125147	0.49985	0
RANBP3	chrUn:25067461-25104703	35.3837	34.8003	-0.0239869	40.6065	35.9244	-0.176748	38.3112	37.6832	-0.0238442	38.6092	34.5787	-0.159061	38.2988	35.635	-0.104007	0.49995	0
LIMD1	chr8:128249174-128295335	7.26543	7.96149	0.13199	7.20626	8.10115	0.168876	6.13679	6.99185	0.18819	5.83706	5.98575	0.0362914	6.66209	7.28871	0.12969	0.50005	0
TMEM237	chr9:57663701-57696158	35.1756	29.0996	-0.273578	37.4915	36.5945	-0.0349399	42.7368	47.6285	0.156345	59.5646	50.5641	-0.236341	43.4554	40.3717	-0.106191	0.50005	0
PLCH2	chr5:171785837-171814907	91.2002	87.6015	-0.0580818	100.502	90.5134	-0.151016	83.0891	88.1522	0.0853377	97.2824	83.2198	-0.225252	93.4171	87.2581	-0.0983972	0.5001	0
PRAGMIN	chr16:59780250-59833359	2.68974	3.71656	0.466503	3.45881	3.59891	0.0572827	3.90236	4.04052	0.0501942	3.16115	3.2435	0.0371012	3.29529	3.64151	0.144132	0.50015	0
SPON2	chr14:82972884-82975463	2.09337	2.37975	0.184981	2.62652	4.03654	0.619964	3.03519	3.50063	0.205832	4.09889	4.3005	0.069272	2.93762	3.52259	0.261988	0.50015	0
RGD1309313	chr1:251573682-251590918	3.85166	4.96295	0.365718	5.87044	6.39807	0.124169	8.51243	8.61957	0.0180443	7.72426	9.07551	0.232582	6.40805	7.14881	0.157818	0.5002	0
KCNE2	chr11:32283168-32290828	59.7869	55.0104	-0.120125	71.7773	55.379	-0.37419	37.6144	39.3546	0.0652458	50.0321	45.9178	-0.123801	55.5663	49.1778	-0.176204	0.50025	0
IRX4	chr17:106224-116183	4.28842	5.02222	0.227879	4.47929	5.1423	0.199145	4.96356	4.89076	-0.0213149	4.48	5.42761	0.27682	4.55275	5.10615	0.165499	0.50055	0
PPCS	chr5:140008433-140012295	8.28914	5.53482	-0.582687	9.13443	8.42779	-0.116161	9.26212	7.71101	-0.264423	7.18268	8.58166	0.256736	8.49574	7.50625	-0.178648	0.5006	0
PDZK1	chr2:191643592-191675995	2.49331	1.90782	-0.386135	3.59511	2.30375	-0.642053	4.41103	5.17478	0.230381	4.79755	4.05957	-0.240971	3.78823	3.27649	-0.209374	0.5007	0
RNF44	chr17:15981864-15996336	31.9703	28.1919	-0.18145	29.0381	30.4344	0.067753	31.7189	29.8094	-0.0895727	34.2723	25.2974	-0.438054	31.7635	28.4136	-0.160786	0.5008	0
VAPB	chr3:164632287-164675322	129.762	125.729	-0.0455547	128.608	110.983	-0.212641	105.201	96.8321	-0.119594	102.716	88.1892	-0.219985	117.563	105.982	-0.149611	0.5008	0
GRIN1	chr3:3452456-3480482	68.7479	62.3572	-0.14076	61.3514	61.0682	-0.00667341	72.1772	66.274	-0.1231	67.5154	63.6805	-0.0843647	67.4715	63.0958	-0.0967338	0.5009	0
LITAF	chr10:4614177-4623903	13.5671	14.8137	0.126816	14.0392	17.6284	0.328444	32.3137	25.8919	-0.319648	21.167	29.9666	0.501538	19.9279	21.6655	0.120607	0.501	0
SERGEF	chr1:96974990-97181171	6.719	6.20916	-0.113848	7.16011	6.24201	-0.19797	7.27658	5.73384	-0.343761	4.98335	4.7561	-0.0673363	6.56804	5.75079	-0.191702	0.5011	0
RPS27	chr2:182451525-182452634	825.992	891.196	0.109614	936.486	967.01	0.0462737	556.186	587.894	0.0799879	459.378	555.19	0.273301	706.451	759.204	0.103898	0.5012	0
BCL7C	chr1:186993654-186997484	8.54557	9.82659	0.201514	7.86714	9.1908	0.224352	18.5453	16.1048	-0.203558	14.4045	21.3044	0.564635	12.1265	13.7978	0.186267	0.50135	0
UBA6	chr14:23666101-23729920	8.22118	8.58954	0.0632357	8.49847	7.5113	-0.178141	10.6924	10.2418	-0.0621115	11.5137	9.90798	-0.216694	9.6777	8.98132	-0.107737	0.50135	0
TMEM230	chr3:119997328-120007233	26.557	29.2243	0.138076	29.3352	31.3014	0.0935941	39.698	43.2009	0.121996	39.8621	43.5576	0.127907	33.603	36.3333	0.112702	0.5016	0
CCDC107	chr5:59972733-59975294	40.5478	46.7553	0.205507	42.1756	51.9266	0.300066	41.7405	45.1388	0.112921	49.5134	46.1877	-0.100312	43.4898	47.4918	0.127002	0.50165	0
LURAP1L	chr5:99599023-99647041	17.7205	18.7492	0.0814146	19.0419	20.1604	0.0823477	17.8925	22.1732	0.309458	24.5885	26.2619	0.0949838	19.7889	21.6389	0.128937	0.5017	0
ARPC5L	chr3:18794632-18802255	13.306	15.9738	0.263634	15.7461	18.4807	0.231029	22.4907	21.851	-0.0416296	18.3211	20.702	0.176263	17.328	19.0791	0.138885	0.50175	0
CHRM3	chr17:70748591-71218463	13.2773	13.4614	0.0198768	12.8323	11.9092	-0.107702	9.69221	9.02928	-0.102214	10.1008	7.98818	-0.338527	11.5942	10.7	-0.115796	0.5019	0
INHA	chr9:74781128-74784124	8.04589	6.39966	-0.330258	8.39707	8.27212	-0.0216305	12.4106	13.5622	0.128021	16.3431	12.3358	-0.405834	11.1582	9.94494	-0.166069	0.50195	0
KIF7	chr1:135428550-135490946	2.35568	2.14011	-0.138455	2.12275	2.08146	-0.028337	1.63862	1.33391	-0.29682	1.62427	1.17738	-0.464211	1.95751	1.70508	-0.19918	0.50195	0
MRPL43	chr1:250072418-250073222	17.6426	23.6102	0.42035	17.968	19.844	0.143275	26.2762	31.0166	0.239283	31.0553	29.5077	-0.0737481	22.9907	25.6798	0.159587	0.50205	0
QARS	chr16_random:1248192-1256228	20.3217	18.053	-0.170783	20.8267	21.1758	0.0239875	24.5648	23.3965	-0.0703007	25.4433	22.4042	-0.183518	22.7181	21.1019	-0.106473	0.5021	0
FUT1	chr1:96085913-96089332	0.736962	0.253327	-1.54059	0.434437	0.678247	0.642663	1.46983	1.13141	-0.377518	1.41919	1.33501	-0.0882253	0.993346	0.823671	-0.270229	0.50245	0
EXOC3L4	chr6:136172534-136186059	2.35061	2.25731	-0.0584331	2.43449	1.82567	-0.415193	2.66142	2.02671	-0.393059	2.20286	2.2971	0.0604333	2.41589	2.09381	-0.206425	0.50275	0
TRABD	chr7:127379629-127390602	12.9155	11.8287	-0.126817	14.5442	11.7834	-0.303689	14.7597	14.2877	-0.0468811	17.1819	17.0961	-0.00722187	14.8246	13.5997	-0.124411	0.50285	0
MRPL30	chr9:36839341-36850101	8.84561	6.51703	-0.440748	11.7283	11.2394	-0.0614285	25.5582	24.2292	-0.0770393	25.7486	21.1755	-0.2821	17.5718	15.326	-0.197273	0.5029	0
RGD1565785	chrX:72641313-72660592	1.08017	0.617715	-0.80625	0.549927	0.490089	-0.166195	1.61426	0.688389	-1.22958	0.809525	1.46598	0.856723	1.00362	0.798261	-0.330279	0.50295	0
NUDCD2	chr10:25763128-25768887	8.70202	10.0012	0.200746	9.11499	9.86658	0.11431	12.0115	11.4944	-0.0634832	8.36653	11.4742	0.455696	9.52693	10.6368	0.158984	0.503	0
ATG10	chr2:21076288-21374627	7.25481	6.29611	-0.204478	7.11039	6.8751	-0.0485486	5.75193	4.41791	-0.380681	5.42953	4.9635	-0.129472	6.44668	5.68123	-0.182355	0.50305	0
CTNS	chr10:60059355-60075352	2.94456	3.22336	0.130513	3.35471	3.06582	-0.129917	6.52457	6.64275	0.0258972	4.52746	6.96993	0.622442	4.2758	4.85321	0.182744	0.50305	0
RUFY1	chr10:35933369-35977968	22.8115	20.4628	-0.156761	20.9522	20.4416	-0.0355919	23.1312	21.4341	-0.109933	22.3488	20.7614	-0.106293	22.3402	20.7055	-0.109628	0.50305	0
IGFBP5	chr9:71999494-72016485	56.7032	54.9927	-0.04419	59.4521	49.4713	-0.265136	37.74	39.884	0.0797149	49.1547	39.8471	-0.302856	51.3194	46.3211	-0.147834	0.5031	0
RPS13	chr1:174425812-174428243	108.788	127.438	0.228276	142.099	151.324	0.0907401	229.488	242.817	0.0814465	219.602	238.436	0.118712	172.523	186.449	0.111995	0.50325	0
SARM1	chr10:64576067-64607479	24.197	23.8106	-0.0232263	25.5603	22.6625	-0.173593	16.9713	15.886	-0.0953449	15.6856	14.1303	-0.150649	20.8915	19.3265	-0.112337	0.50325	0
SPAG9	chr10:82628209-82762803	63.2482	60.4335	-0.0656747	59.7439	56.5809	-0.0784763	56.1281	54.4909	-0.0427087	54.9825	48.2838	-0.187433	58.8359	55.0349	-0.0963519	0.50345	0
DTD2	chr6:72153047-72158654	26.7629	26.912	0.00801472	26.1322	28.889	0.144694	21.2778	25.0456	0.235207	19.1269	25.0834	0.391127	23.5546	26.5018	0.170081	0.50365	0
BFSP1	chr3:132268137-132302378	0.572278	0.903561	0.658905	1.33261	0.381989	-1.80265	2.59306	0.894315	-1.5358	1.17253	2.59973	1.14873	1.39057	1.16011	-0.261417	0.5037	0
MAK	chr17:29644794-29698155	40.6034	36.9024	-0.137886	43.7627	38.6522	-0.179152	38.6588	43.1905	0.159917	55.5185	48.995	-0.180336	44.6325	41.5827	-0.102111	0.5037	0
RGD1562079	chr1:85267792-85268742	40.015	34.1562	-0.228393	46.1015	38.8103	-0.248372	49.8491	50.7906	0.0269939	63.2396	61.2979	-0.0449907	49.5548	45.5582	-0.121312	0.50385	0
DDX41	chr17:15147007-15152401	27.3028	26.013	-0.0698176	30.1174	25.3474	-0.248764	26.266	26.1998	-0.00363863	29.5157	28.305	-0.0604255	28.3939	26.3573	-0.107381	0.504	0
DNMT3B	chr3:144030731-144069265	1.16322	1.15343	-0.0121933	1.40066	1.28953	-0.11926	1.98438	1.49866	-0.40502	1.88787	1.64309	-0.200346	1.59371	1.38211	-0.205512	0.50415	0
[truncated: 11,134 more rows]
